# Supplementary material for: Coexpression Network Analysis of Genes Related to the Characteristics of Tumor Stemness in Triple-Negative Breast Cancer
Source: Biomed Res Int. 2020 Jul 11;2020:7575862. doi: 10.1155/2020/7575862 (PMC7374213; doi:10.1155/2020/7575862)
Supplement: Supplementary materials — Figure S1: (a, b) KM overall survival curves of mRNAsi in BC (a) and in TNBC (b). (c) OS curves between TNBC and other BC subtypes. Figure S2: WGCNA results. (a) Clustering of samples and removal of outliers. (b) Heat map of sample dendrogram matched with clinical trait. (c) Analysis of topology for appropriate soft thresholding powers of mean connectivity and scale independence. (d) Heat map of the expression of six key genes. Figure S3: other gene modules in WGCNA analysis. Figure S4: (a, b) GO enrichment analysis of other modules of interest. Red module (a) and magenta module (b) Figure S5. OS curve of key genes of breast cancer in GEPIA database. Table S1: DEGs between breast cancer versus normal tissues and TNBC versus non-TNBC. Table S2: DEGs results in other published study of breast cancer and the DEGs results calculated by the FPKM data. [file 7575862.f1.zip › Appendices6_TableS1.xlsx]

## Sheet: Sheet1
Breast cancer vs Normal						TNBC vs non-TNBC
Ensembl_ID	log2FoldChange	lfcSE	stat	pvalue	padj	Gene	log2FoldChange	lfcSE	stat	pvalue	padj
TNMD	-4.35865	0.21012	-20.7436	1.40089e-95	1.21407e-93	SEMA3F	-1.16137	0.0798385	-14.5465	6.14255e-48	4.09765e-46
C1orf112	1.34222	0.0732325	18.3282	4.9286e-75	2.38891e-73	SLC7A2	-3.5123	0.198688	-17.6775	6.25481e-70	1.24663e-67
CFH	-1.43399	0.0986166	-14.5411	6.6527e-48	1.39337e-46	CD38	1.41466	0.174084	8.12626	4.42737e-16	3.92252e-15
SEMA3F	1.13369	0.0822501	13.7835	3.20335e-43	5.66033e-42	PDK4	-1.03847	0.164057	-6.32991	2.45303e-10	1.3138e-09
AOC1	2.77542	0.20702	13.4065	5.53926e-41	8.98815e-40	SLC22A16	2.60538	0.194327	13.4072	5.49081e-41	2.42528e-39
KLHL13	-2.60753	0.153408	-16.9974	8.58477e-65	3.01864e-63	ZMYND10	-2.7133	0.137338	-19.7563	7.07542e-87	3.045e-84
CYP26B1	-2.16486	0.134364	-16.1119	2.10595e-58	6.127e-57	ARX	-1.20411	0.28415	-4.23758	2.25946e-05	6.99292e-05
DBNDD1	1.87539	0.103009	18.206	4.62219e-74	2.15111e-72	CALCR	-1.54717	0.186403	-8.30014	1.03989e-16	9.67675e-16
TFPI	-1.70824	0.1283	-13.3144	1.9097e-40	3.03942e-39	HOXA11	1.98838	0.17482	11.3739	5.64361e-30	1.29399e-28
SLC7A2	1.1724	0.199741	5.86958	4.369e-09	1.58278e-08	ACSM3	1.11227	0.112466	9.88987	4.60629e-23	6.70885e-22
FKBP4	1.47611	0.0792235	18.6322	1.76123e-77	9.13235e-76	MPO	1.22627	0.149387	8.20869	2.23608e-16	2.02689e-15
HSPB6	-4.51248	0.167233	-26.9831	2.3322e-160	8.6014e-158	SOX8	3.53936	0.231599	15.2823	1.00365e-52	8.51808e-51
PDK4	-3.55943	0.156949	-22.6789	7.2302e-114	9.7972e-112	CRLF1	2.38801	0.170619	13.9962	1.6443e-44	8.94451e-43
ZMYND10	2.50286	0.151122	16.5618	1.31534e-61	4.17875e-60	ABCC8	-3.40418	0.210687	-16.1575	1.00552e-58	1.1783e-56
ABCB5	-3.52992	0.199574	-17.6873	5.25076e-70	2.14455e-68	CACNG3	1.40768	0.278828	5.04855	4.4517e-07	1.69517e-06
ARX	1.87764	0.26996	6.95524	3.51969e-12	1.57324e-11	TAC1	-1.9651	0.242537	-8.10229	5.39361e-16	4.74402e-15
SLC4A1	-2.07582	0.215721	-9.62268	6.41348e-22	4.78252e-21	CX3CL1	1.36178	0.141081	9.65249	4.79769e-22	6.54465e-21
CALCR	-1.40989	0.177706	-7.93382	2.12507e-15	1.14498e-14	SPATA20	-1.50437	0.0940009	-16.0038	1.20182e-57	1.3253e-55
PRSS22	1.44438	0.106431	13.5711	5.94358e-42	9.97757e-41	CACNA1G	-1.3466	0.162831	-8.26994	1.3403e-16	1.23705e-15
SKAP2	-1.16893	0.0813541	-14.3684	8.168e-47	1.65015e-45	DLX6	2.96058	0.288369	10.2666	9.96044e-25	1.63865e-23
MEOX1	-2.65523	0.164476	-16.1435	1.26114e-58	3.68882e-57	TTC22	1.50326	0.150356	9.99806	1.55407e-23	2.35293e-22
THSD7A	-1.23582	0.10921	-11.316	1.09386e-29	1.15216e-28	USH1C	1.6042	0.236581	6.78077	1.19538e-11	7.23852e-11
ACSM3	-1.66177	0.129211	-12.8609	7.4665e-38	1.08743e-36	IFRD1	1.4009	0.075979	18.438	6.50717e-76	1.76788e-73
PRKAR2B	-2.45253	0.117321	-20.9044	4.88497e-97	4.42916e-95	SCIN	-1.85614	0.185364	-10.0135	1.32959e-23	2.02376e-22
MPO	-1.07503	0.145848	-7.3709	1.69486e-13	8.18834e-13	PNPLA4	-1.00368	0.0784948	-12.7866	1.94765e-37	6.9491e-36
MYCBP2	-1.17054	0.0789104	-14.8338	8.85226e-50	1.97283e-48	PRSS21	1.47341	0.252161	5.84313	5.12295e-09	2.40245e-08
ITGAL	1.0458	0.111085	9.41445	4.75546e-21	3.39689e-20	PROM1	2.39203	0.233689	10.236	1.36821e-24	2.23506e-23
ASB4	-1.3404	0.200526	-6.68443	2.31823e-11	9.84194e-11	DNAH9	-1.68332	0.181171	-9.29135	1.52348e-20	1.86903e-19
TMEM132A	2.1781	0.113166	19.2469	1.49766e-82	8.99182e-81	SLC13A2	-1.26362	0.248592	-5.08311	3.71312e-07	1.42644e-06
TAC1	-1.4516	0.245977	-5.90138	3.60484e-09	1.31449e-08	MATK	1.09944	0.154529	7.11477	1.12102e-12	7.48133e-12
CX3CL1	-2.38165	0.142542	-16.7084	1.13887e-62	3.73923e-61	CD79B	1.47536	0.16798	8.78293	1.59268e-18	1.69742e-17
CACNA1G	-1.34965	0.154245	-8.75008	2.13201e-18	1.33358e-17	TKTL1	2.47898	0.207032	11.9739	4.86838e-33	1.34062e-31
TNFRSF12A	1.01334	0.110792	9.14627	5.89306e-20	3.99815e-19	PAX6	1.55251	0.111558	13.9166	5.02155e-44	2.6515e-42
DLX6	2.16365	0.283425	7.63392	2.27714e-14	1.15881e-13	CACNA2D2	-2.82408	0.137113	-20.5968	2.93331e-94	1.8526e-91
BAIAP2L1	1.11514	0.0771033	14.4629	2.07741e-47	4.29599e-46	BAIAP3	-2.54416	0.162331	-15.6726	2.32679e-55	2.29521e-53
ETV1	-1.07567	0.102631	-10.481	1.0566e-25	9.34683e-25	FMO3	3.02619	0.18714	16.1707	8.11379e-59	9.57722e-57
GGCT	1.39782	0.0819676	17.0533	3.30235e-65	1.17467e-63	E2F2	1.445	0.119091	12.1336	7.01087e-34	2.04527e-32
DBF4	1.2216	0.0728714	16.7638	4.48824e-63	1.49158e-61	TFAP2D	2.50533	0.688392	3.6394	0.000273278	0.000725067
GTF2IRD1	1.09031	0.0524039	20.8059	3.82788e-96	3.38315e-94	PLEKHG6	1.09163	0.108973	10.0175	1.27727e-23	1.94717e-22
MYH13	1.05237	0.14613	7.20161	5.95043e-13	2.78432e-12	IL32	1.50758	0.120281	12.5339	4.87335e-36	1.58844e-34
DNAH9	-1.62376	0.182528	-8.89594	5.79264e-19	3.72643e-18	PAX7	-1.26095	0.40814	-3.08952	0.00200483	0.00462399
SLC13A2	-1.76948	0.239937	-7.37477	1.64635e-13	7.96025e-13	TRAF3IP3	1.24761	0.123787	10.0787	6.86127e-24	1.0674e-22
GAS7	-1.07594	0.102002	-10.5482	5.17607e-26	4.64162e-25	ETV7	1.23702	0.129583	9.54619	1.34558e-21	1.77576e-20
CEACAM7	1.70621	0.223521	7.63333	2.2877e-14	1.16383e-13	NCAPD2	1.18741	0.077518	15.3179	5.81065e-53	4.97496e-51
SCN4A	-3.56616	0.154099	-23.142	1.7496e-118	2.6819e-116	GIPR	-1.93978	0.141871	-13.6728	1.47545e-42	7.1183e-41
TKTL1	-1.25466	0.20382	-6.15574	7.473e-10	2.85977e-09	PRSS3	3.22185	0.234618	13.7323	6.50293e-43	3.21386e-41
RPUSD1	1.37747	0.074708	18.4381	6.49988e-76	3.23688e-74	ANOS1	-1.20064	0.127143	-9.44323	3.61468e-21	4.62107e-20
CACNA2D2	1.16119	0.147548	7.86994	3.54817e-15	1.89076e-14	ANLN	1.22273	0.120354	10.1595	3.0066e-24	4.79233e-23
BAIAP3	1.14537	0.162318	7.05631	1.70983e-12	7.80409e-12	ZBTB32	1.05603	0.128654	8.20832	2.24302e-16	2.03205e-15
PIGQ	1.2323	0.07959	15.4831	4.5085e-54	1.14527e-52	GABRA3	1.31348	0.394811	3.32685	0.000878343	0.00215003
SELE	-1.42249	0.167743	-8.48016	2.24894e-17	1.33926e-16	SEMA3B	-1.69349	0.162597	-10.4153	2.11204e-25	3.6487e-24
E2F2	2.59001	0.124281	20.84	1.87726e-96	1.6712e-94	NR1H4	4.03283	0.455045	8.86249	7.82464e-19	8.56063e-18
SYN1	2.08876	0.167231	12.4902	8.44024e-36	1.14147e-34	ELOVL5	-1.27738	0.108939	-11.7257	9.4157e-32	2.39359e-30
CYB561	1.30942	0.0839226	15.6027	6.98096e-55	1.82824e-53	KDM5D	-1.12763	0.393434	-2.86613	0.00415528	0.00907308
CELSR3	2.46676	0.140217	17.5924	2.81536e-69	1.12185e-67	HEBP1	-1.14235	0.112945	-10.1142	4.78143e-24	7.49841e-23
AASS	-1.80592	0.100845	-17.908	1.02159e-71	4.43462e-70	GPRC5A	-1.13269	0.128277	-8.83005	1.04624e-18	1.13343e-17
MGST1	-1.14956	0.121033	-9.49788	2.14215e-21	1.55715e-20	MAMLD1	1.72592	0.116665	14.7938	1.60709e-49	1.14933e-47
MMP25	1.34794	0.150198	8.97445	2.84776e-19	1.864e-18	NPC1L1	-1.95953	0.199676	-9.81355	9.84428e-23	1.40433e-21
MAPK8IP2	2.68753	0.145802	18.4327	7.17506e-76	3.56948e-74	IL20RA	-1.18763	0.167028	-7.11038	1.15725e-12	7.71678e-12
TENM1	-1.80888	0.17568	-10.2964	7.31401e-25	6.20919e-24	ATP1A2	-1.90727	0.199513	-9.55962	1.18188e-21	1.56781e-20
PAX7	6.94824	0.414873	16.7479	5.86758e-63	1.94077e-61	VSIG2	-1.08716	0.221389	-4.9106	9.07965e-07	3.33574e-06
MASP2	-1.28017	0.114676	-11.1634	6.16045e-29	6.28761e-28	MARCO	2.57162	0.227518	11.3029	1.26919e-29	2.85485e-28
IYD	1.83323	0.248688	7.37161	1.6858e-13	8.14753e-13	SYT13	-2.82262	0.272149	-10.3716	3.33913e-25	5.69572e-24
MLXIPL	-3.50707	0.165934	-21.1354	3.7629e-99	3.598e-97	RUNX3	1.52475	0.12528	12.1707	4.45127e-34	1.30876e-32
ETV7	2.05252	0.132872	15.4474	7.85395e-54	1.97565e-52	PLEKHB1	1.48735	0.164096	9.0639	1.25872e-19	1.45295e-18
HHATL	-2.86655	0.24491	-11.7045	1.20861e-31	1.37904e-30	NRXN3	-1.55927	0.168055	-9.2783	1.72196e-20	2.10351e-19
SEMA3G	-2.80425	0.119013	-23.5626	9.3262e-123	1.5884e-120	GABRA1	-1.51354	0.445132	-3.4002	0.000673354	0.00167971
NME1-NME2	1.52029	0.13033	11.6649	1.92605e-31	2.1799e-30	BIRC3	1.08051	0.129967	8.31372	9.27488e-17	8.66231e-16
DPF1	1.24431	0.116592	10.6723	1.37172e-26	1.25815e-25	DEPDC1	1.23493	0.124419	9.92557	3.22248e-23	4.74743e-22
SYT7	1.09192	0.113292	9.63811	5.51956e-22	4.12659e-21	RRAGD	1.59183	0.10635	14.9679	1.19033e-50	9.10168e-49
PLAUR	1.69644	0.098518	17.2196	1.89452e-66	6.95512e-65	KCNG1	2.84376	0.242533	11.7253	9.45849e-32	2.40322e-30
ANLN	3.37563	0.123579	27.3157	2.7646e-164	1.1492e-161	AGPAT4	1.0888	0.0995464	10.9376	7.61833e-28	1.53985e-26
DCN	-1.98015	0.118829	-16.6639	2.39872e-62	7.80253e-61	SH2D2A	1.5302	0.127164	12.0333	2.37478e-33	6.66788e-32
CEP68	-1.19801	0.0468749	-25.5576	4.5181e-144	1.1851e-141	ARNTL2	1.36795	0.143506	9.53233	1.53789e-21	2.01642e-20
ZBTB32	1.28751	0.132211	9.73833	2.06929e-22	1.5732e-21	RABEP1	-1.59997	0.0829721	-19.2832	7.43386e-83	2.61968e-80
GABRA3	4.22	0.360839	11.695	1.35266e-31	1.53911e-30	FUT8	-1.41645	0.0910111	-15.5635	1.28878e-54	1.21935e-52
BRCA1	1.09855	0.0917329	11.9756	4.77176e-33	5.79367e-32	SLC4A7	-1.07498	0.120416	-8.92722	4.36849e-19	4.84921e-18
CD22	1.25786	0.143316	8.77679	1.68206e-18	1.0578e-17	APBA2	1.84724	0.134736	13.7101	8.83375e-43	4.31319e-41
CALCOCO1	-1.04712	0.0570119	-18.3667	2.42796e-75	1.18622e-73	MYOC	-1.50167	0.281352	-5.33734	9.43223e-08	3.86794e-07
SLC7A14	-2.82963	0.199772	-14.1643	1.52384e-45	2.94166e-44	STAP1	1.04073	0.156265	6.66003	2.73778e-11	1.60256e-10
CLDN11	-2.39143	0.141205	-16.9358	2.44869e-64	8.44084e-63	MYOM2	1.13724	0.155537	7.31173	2.63719e-13	1.85922e-12
SLC25A39	1.1497	0.0676886	16.9852	1.05717e-64	3.69348e-63	DNAH5	-2.44848	0.147784	-16.5679	1.18842e-61	1.60539e-59
GPRC5A	2.36366	0.124553	18.9771	2.63975e-80	1.49348e-78	SOX30	1.60092	0.147138	10.8804	1.42926e-27	2.83814e-26
CD6	1.20744	0.134214	8.99641	2.33215e-19	1.53449e-18	BEST2	1.15147	0.208963	5.51043	3.57954e-08	1.53669e-07
TACC3	2.34031	0.0919145	25.4618	5.2251e-143	1.3212e-140	CDH10	-1.90113	0.352398	-5.39482	6.85904e-08	2.85927e-07
ZC3H3	1.03442	0.0646926	15.9897	1.50704e-57	4.2755e-56	RAB27B	-1.85361	0.106515	-17.4023	7.92914e-68	1.40731e-65
DPEP1	2.46677	0.145241	16.9839	1.08031e-64	3.77164e-63	RIPOR3	-1.5365	0.155037	-9.91052	3.74704e-23	5.49691e-22
CLCA1	-1.46573	0.449411	-3.26145	0.00110845	0.00239406	USH2A	-1.07262	0.141114	-7.60108	2.9368e-14	2.25196e-13
CLCA4	-3.48798	0.236013	-14.7787	2.00908e-49	4.41332e-48	BARX2	1.44189	0.166401	8.66512	4.51037e-18	4.66589e-17
IGF1	-2.46612	0.141206	-17.4646	2.66467e-68	1.03654e-66	EPHA3	-1.53681	0.165447	-9.28884	1.55982e-20	1.91217e-19
SLC38A5	1.75394	0.127336	13.7741	3.64743e-43	6.41728e-42	GPM6B	1.71283	0.121098	14.1442	2.02782e-45	1.14802e-43
SLC11A1	1.34053	0.113186	11.8435	2.32466e-32	2.72928e-31	FAM214A	-1.65228	0.0927939	-17.8059	6.36491e-71	1.34579e-68
ZNF806	-1.08315	0.241027	-4.49388	6.99378e-06	1.93142e-05	CP	1.2609	0.260238	4.8452	1.26486e-06	4.56823e-06
ATP1A2	-4.66277	0.205402	-22.7007	4.4142e-114	6.0313e-112	XK	1.20935	0.176207	6.86325	6.73097e-12	4.1672e-11
PHLDB1	-1.30496	0.0695145	-18.7725	1.26874e-78	6.80158e-77	FAM184B	-2.18587	0.167833	-13.0241	8.92243e-39	3.44644e-37
MARCO	-1.52155	0.233415	-6.51863	7.09531e-11	2.91539e-10	ROS1	1.66944	0.254763	6.55294	5.64146e-11	3.21525e-10
PRDM11	-1.05044	0.0664012	-15.8196	2.28108e-56	6.26844e-55	TNFRSF17	1.20862	0.206878	5.84219	5.15184e-09	2.41484e-08
SYT13	4.97853	0.255183	19.5096	9.09573e-85	5.91729e-83	KITLG	-1.88554	0.131501	-14.3386	1.25641e-46	7.68559e-45
HGF	-1.07765	0.109212	-9.86754	5.75611e-23	4.49313e-22	TNFRSF9	1.0613	0.14168	7.49083	6.84417e-14	5.08383e-13
ADGRA2	-1.43203	0.089832	-15.9412	3.27994e-57	9.21992e-56	EPN3	-1.12712	0.119353	-9.44355	3.60373e-21	4.60829e-20
SAMD4A	-1.68328	0.0919623	-18.3041	7.68092e-75	3.68294e-73	ELN	1.20146	0.17068	7.03925	1.93277e-12	1.26351e-11
CPS1	-1.10666	0.152008	-7.2803	3.33067e-13	1.57912e-12	NFE2L3	1.3917	0.106017	13.1271	2.30325e-39	9.26463e-38
FHL1	-5.02068	0.141424	-35.501	4.7512e-276	3.3294e-272	SLC4A8	-2.86009	0.147219	-19.4274	4.52452e-84	1.76025e-81
GABRA1	3.25656	0.459436	7.08818	1.35883e-12	6.2328e-12	PTGER3	-2.38954	0.156432	-15.2752	1.118e-52	9.45556e-51
NLRP2	1.31345	0.215684	6.08968	1.1314e-09	4.27101e-09	TNIP3	1.67311	0.18815	8.89241	5.97957e-19	6.59394e-18
EHD2	-1.94759	0.0862909	-22.57	8.5412e-113	1.1172e-110	FSTL4	-1.40638	0.159025	-8.84378	9.25302e-19	1.00667e-17
DEPDC1	3.25872	0.129252	25.2122	2.9433e-140	7.0427e-138	NNAT	-1.30404	0.172097	-7.57736	3.52658e-14	2.6818e-13
RRAGD	-1.23783	0.115962	-10.6745	1.33988e-26	1.22986e-25	MCF2L2	1.69861	0.136547	12.4398	1.58913e-35	5.02805e-34
HSD17B6	3.00311	0.0958569	31.3291	1.8751e-215	3.4066e-212	LY75	1.08698	0.1125	9.66212	4.36748e-22	5.97454e-21
TYMP	1.83176	0.106633	17.1782	3.86717e-66	1.4114e-64	HHAT	-1.29935	0.0841149	-15.4473	7.86151e-54	7.09301e-52
VIM	-1.42349	0.0863564	-16.4839	4.79159e-61	1.49896e-59	FOXC1	3.2689	0.163543	19.988	7.00038e-89	3.58353e-86
KCNG1	2.17363	0.237302	9.15973	5.20251e-20	3.54042e-19	CBLN4	-1.42284	0.160888	-8.8437	9.26013e-19	1.00722e-17
SH2D2A	1.69335	0.133133	12.7192	4.62429e-37	6.54256e-36	CHRDL2	2.84856	0.21204	13.4341	3.81836e-41	1.70829e-39
IBSP	6.91138	0.222699	31.0347	1.8351e-211	2.9037e-208	CCDC85A	-1.13461	0.169475	-6.69481	2.15946e-11	1.27556e-10
HMGB3	2.41556	0.108009	22.3645	8.7221e-111	1.1027e-108	NPFFR2	-2.08723	0.256098	-8.1501	3.63619e-16	3.23986e-15
BAK1	1.02578	0.0636628	16.1127	2.07757e-58	6.048e-57	PHF21B	-3.88899	0.258033	-15.0717	2.48629e-51	1.96923e-49
ARHGAP31	-1.12921	0.0761897	-14.8211	1.07089e-49	2.37798e-48	SERPINB3	3.05169	0.589578	5.17607	2.26609e-07	8.92036e-07
FUT8	1.03206	0.091927	11.2269	3.00821e-29	3.1065e-28	F7	-3.951	0.19283	-20.4895	2.67132e-93	1.62386e-90
EFCAB1	-2.42682	0.186862	-12.9872	1.44573e-38	2.15944e-37	LAMC2	1.44611	0.164323	8.80039	1.36345e-18	1.46274e-17
MYOC	-6.6635	0.289418	-23.0238	2.6917e-117	3.9412e-115	RASGRF1	1.55156	0.182506	8.50139	1.87335e-17	1.84419e-16
DEPDC1B	2.94085	0.114346	25.7189	7.1823e-146	1.9252e-143	CAMK2B	-1.91164	0.200429	-9.53775	1.45968e-21	1.91698e-20
STAP1	1.20065	0.153844	7.80432	5.98245e-15	3.14389e-14	DGKG	1.12245	0.111444	10.0719	7.35741e-24	1.1424e-22
MYOM2	-2.54794	0.145903	-17.4632	2.73079e-68	1.06142e-66	YBX3	1.29526	0.102617	12.6223	1.59116e-36	5.37359e-35
OTC	-3.2243	0.282498	-11.4135	3.5795e-30	3.85217e-29	PRDM6	-1.1055	0.125289	-8.8236	1.10835e-18	1.19699e-17
CYP46A1	-1.2338	0.101555	-12.1491	5.80119e-34	7.27775e-33	CDH3	2.16332	0.157604	13.7263	7.06896e-43	3.48652e-41
SLC18A1	1.9711	0.235565	8.36755	5.88305e-17	3.43093e-16	ARSF	2.5039	0.292966	8.54673	1.26629e-17	1.26062e-16
FLT4	-1.17541	0.0794431	-14.7956	1.56358e-49	3.45015e-48	DGAT2	1.84099	0.144915	12.704	5.6209e-37	1.94694e-35
TLL1	-1.34437	0.129938	-10.3462	4.35332e-25	3.73385e-24	SEZ6	-3.33463	0.26974	-12.3624	4.17553e-35	1.29585e-33
VCAN	1.57705	0.117362	13.4375	3.64494e-41	5.94189e-40	SLC6A16	1.10925	0.145815	7.60724	2.8002e-14	2.14993e-13
C6	-3.16272	0.229389	-13.7876	3.02761e-43	5.36076e-42	GSC2	2.00178	0.455477	4.3949	1.10826e-05	3.56785e-05
RTN4R	1.28394	0.107265	11.9698	5.11352e-33	6.20401e-32	WISP2	-1.196	0.16416	-7.28557	3.20322e-13	2.24202e-12
MYO16	-1.59267	0.174471	-9.1286	6.93932e-20	4.68982e-19	DMRT3	1.62873	0.137395	11.8544	2.04193e-32	5.42925e-31
AIFM2	-1.79088	0.0837559	-21.3822	1.9588e-101	1.977e-99	ST3GAL6	1.53739	0.092576	16.6068	6.22396e-62	8.55021e-60
C2orf83	-1.25683	0.352388	-3.56661	0.000361631	0.000829144	BCAS1	-3.48627	0.179223	-19.4522	2.79264e-84	1.11319e-81
RETSAT	-1.65327	0.0725744	-22.7803	7.1915e-115	9.9649e-113	CHI3L2	3.03381	0.196483	15.4406	8.73415e-54	7.86575e-52
CAPG	1.11817	0.0859083	13.0158	9.9443e-39	1.49034e-37	GLP2R	1.40778	0.191891	7.33634	2.19515e-13	1.5582e-12
ZPBP	-1.1537	0.210055	-5.49239	3.96535e-08	1.33273e-07	MCM10	1.42193	0.133214	10.674	1.34651e-26	2.50602e-25
TG	1.18755	0.127113	9.34248	9.41018e-21	6.63201e-20	ROPN1	4.37349	0.331367	13.1983	8.97014e-40	3.71257e-38
ZIC2	2.91243	0.260852	11.1651	6.04335e-29	6.17194e-28	SNAP91	1.73407	0.2234	7.76218	8.34832e-15	6.68072e-14
ADRB1	-1.31463	0.230792	-5.69616	1.22537e-08	4.28968e-08	PRKCQ	1.52828	0.143585	10.6437	1.86505e-26	3.44341e-25
GPM6B	-1.69249	0.128996	-13.1204	2.5147e-39	3.85954e-38	YBX1	1.32236	0.0743915	17.7757	1.09046e-70	2.24704e-68
MAGEC2	5.52145	0.57736	9.56328	1.14082e-21	8.40741e-21	CTNNA2	1.96013	0.274568	7.13898	9.40284e-13	6.31413e-12
PREX2	-2.30738	0.113575	-20.3158	9.3177e-92	7.31283e-90	ASPM	1.02674	0.124305	8.2598	1.45919e-16	1.34089e-15
ARHGAP6	-1.30749	0.106537	-12.2727	1.2697e-34	1.63985e-33	STAG3	1.20433	0.120274	10.0133	1.33274e-23	2.02792e-22
ROS1	2.15074	0.26264	8.18894	2.63536e-16	1.49255e-15	DDX3Y	-1.15286	0.346877	-3.32354	0.000888834	0.00217364
LMO3	-1.64378	0.186394	-8.81885	1.15642e-18	7.32685e-18	PFKP	1.44265	0.128936	11.1889	4.62196e-29	1.00434e-27
GUCA1A	1.86215	0.205236	9.07321	1.15564e-19	7.73875e-19	SYT1	-4.23643	0.235229	-18.0098	1.63155e-72	3.74263e-70
CELF2	-1.88413	0.103224	-18.2528	1.96525e-74	9.26029e-73	NAV3	-1.71824	0.163285	-10.523	6.76958e-26	1.20546e-24
ADAMTS6	1.22177	0.107052	11.4129	3.60572e-30	3.87954e-29	ATP2B3	1.49375	0.269491	5.54285	2.97589e-08	1.28846e-07
UTS2	2.0995	0.210381	9.97952	1.87368e-23	1.50127e-22	FGFR3	-1.0182	0.179965	-5.65773	1.53388e-08	6.84726e-08
TNFRSF9	2.73882	0.147009	18.6303	1.82398e-77	9.44773e-76	PRR11	1.10314	0.132362	8.33429	7.79622e-17	7.32492e-16
EPN3	2.19443	0.122042	17.9809	2.75187e-72	1.20846e-70	REEP1	-2.07246	0.14506	-14.287	2.63902e-46	1.58442e-44
RFC2	1.03736	0.061571	16.8482	1.08119e-63	3.64497e-62	ATP11A	1.32084	0.0960067	13.7578	4.57362e-43	2.27889e-41
FOXP3	2.18531	0.115074	18.9904	2.04818e-80	1.16282e-78	TTC7A	1.11628	0.0689983	16.1783	7.17004e-59	8.50454e-57
DKK3	-1.21253	0.10146	-11.9508	6.42676e-33	7.76084e-32	PAGE1	2.41347	0.617449	3.90877	9.27659e-05	0.000263403
NFE2L3	1.29376	0.112851	11.4643	1.99277e-30	2.16787e-29	MAST4	-1.58082	0.108301	-14.5966	2.95335e-48	1.99478e-46
SLC4A8	1.6678	0.153694	10.8514	1.96374e-27	1.87185e-26	ADAM7	1.70291	0.574032	2.96657	0.00301141	0.00673571
LAMC3	-1.39989	0.141764	-9.87475	5.35656e-23	4.19193e-22	GAL	2.78751	0.230093	12.1147	8.82783e-34	2.55387e-32
PTGER3	-1.36644	0.158603	-8.61546	6.96619e-18	4.25748e-17	MAOB	-1.08439	0.205054	-5.28834	1.2343e-07	5.00879e-07
TNIP3	2.10242	0.18712	11.2357	2.72471e-29	2.81789e-28	PLA2G10	-2.22469	0.160998	-13.8181	1.98302e-43	1.00559e-41
HOMER3	1.20987	0.100327	12.0592	1.73423e-33	2.14059e-32	DAPP1	1.11967	0.114214	9.80333	1.08933e-22	1.55034e-21
RAD51	2.58067	0.0991689	26.0229	2.7246e-149	7.7702e-147	FGF10	-3.86919	0.247785	-15.6151	5.74185e-55	5.51842e-53
POLQ	2.61714	0.111613	23.4483	1.3744e-121	2.2548e-119	ASNS	1.06623	0.092974	11.468	1.90959e-30	4.47975e-29
PRSS8	1.52821	0.101772	15.016	5.77126e-51	1.33723e-49	CNGB1	1.78512	0.246354	7.24615	4.28771e-13	2.96608e-12
ALX4	-2.39738	0.19667	-12.1899	3.52026e-34	4.46191e-33	ST6GALNAC2	-1.23871	0.127127	-9.74386	1.9596e-22	2.74316e-21
FSTL4	1.771	0.162815	10.8773	1.47822e-27	1.41759e-26	CHAT	2.06389	0.601303	3.43236	0.000598359	0.00150478
FOXN3	-1.60474	0.0710668	-22.5807	6.7145e-113	8.8065e-111	NCK2	1.06253	0.0644871	16.4766	5.40035e-61	7.09796e-59
METTL24	-1.15756	0.124846	-9.27188	1.82893e-20	1.26928e-19	MGAT4A	-1.05848	0.106254	-9.96185	2.23855e-23	3.34426e-22
NNAT	-3.60632	0.16447	-21.927	1.4364e-106	1.6272e-104	TRIP13	1.18042	0.112251	10.5159	7.29805e-26	1.29719e-24
NRIP2	-1.08161	0.0770516	-14.0374	9.19955e-45	1.72895e-43	PRLH	-3.41289	0.282434	-12.0839	1.28513e-33	3.67414e-32
LAMA3	-1.8189	0.149557	-12.1619	4.95939e-34	6.23924e-33	CYBRD1	-1.58456	0.127396	-12.438	1.62467e-35	5.13382e-34
PTPRN	1.78031	0.192124	9.26646	1.92423e-20	1.33485e-19	CDH19	4.26683	0.394978	10.8027	3.34231e-27	6.45512e-26
CBLN4	-1.55108	0.155236	-9.99172	1.65673e-23	1.33027e-22	SLC6A15	3.87929	0.315248	12.3055	8.46016e-35	2.58109e-33
RELT	1.50481	0.0840517	17.9034	1.10893e-71	4.80523e-70	SPEG	1.43383	0.122231	11.7305	8.88848e-32	2.26075e-30
KCNH2	2.16311	0.190449	11.358	6.76821e-30	7.19849e-29	TRPC5	-1.53287	0.36743	-4.17188	3.021e-05	9.18101e-05
CYFIP2	1.36077	0.115619	11.7694	5.61092e-32	6.50347e-31	TRHDE	-1.09686	0.217949	-5.03262	4.83812e-07	1.83456e-06
CCDC85A	-2.006	0.15394	-13.031	8.15192e-39	1.22584e-37	SIDT1	-1.89074	0.123114	-15.3576	3.15029e-53	2.74064e-51
NPFFR2	1.46842	0.242696	6.05044	1.44448e-09	5.41578e-09	TMEM38A	1.37776	0.111019	12.4102	2.29996e-35	7.21144e-34
PHF21B	1.44753	0.248616	5.82234	5.80291e-09	2.0804e-08	PVR	1.16462	0.0840452	13.8571	1.15206e-43	5.94125e-42
GYG2	-4.11666	0.129715	-31.736	4.9484e-221	1.1033e-217	CYP2W1	2.23858	0.247695	9.03767	1.60048e-19	1.83352e-18
F7	2.82616	0.200878	14.0691	5.88503e-45	1.11371e-43	PANX2	1.03895	0.157911	6.57935	4.72515e-11	2.71169e-10
TMCC3	-1.01236	0.0992241	-10.2028	1.92674e-24	1.60514e-23	CLCN4	2.38451	0.123984	19.2325	1.97968e-82	6.82792e-80
LAMC2	-1.39002	0.15881	-8.75273	2.08254e-18	1.30297e-17	PTGS2	3.52894	0.199645	17.6761	6.41203e-70	1.27275e-67
RASGRF1	1.38011	0.174536	7.90728	2.63068e-15	1.41028e-14	IGF2BP2	2.79637	0.164916	16.9564	1.72734e-64	2.68377e-62
ATP2B4	-1.0411	0.0791829	-13.1481	1.7454e-39	2.69146e-38	FRY	-1.26825	0.0962107	-13.182	1.11367e-39	4.58199e-38
ALDH18A1	1.02792	0.0527452	19.4885	1.37563e-84	8.89029e-83	CA12	-3.71177	0.143294	-25.9032	6.1345e-148	3.3148e-144
CREB3L3	1.67833	0.225598	7.43949	1.01075e-13	4.95102e-13	NTN4	-1.77757	0.154845	-11.4796	1.6699e-30	3.93262e-29
COL11A1	6.17758	0.177762	34.7519	1.2961e-264	7.9472e-261	ENO1	1.15862	0.0819159	14.144	2.03304e-45	1.14949e-43
WNT8A	-1.89062	0.240145	-7.87281	3.46758e-15	1.84903e-14	SLC12A1	1.46492	0.264757	5.53307	3.14667e-08	1.3589e-07
SPAG4	1.57139	0.115955	13.5517	7.7379e-42	1.29587e-40	TXK	1.12637	0.144969	7.76975	7.86414e-15	6.30466e-14
DGAT2	-3.30295	0.152756	-21.6223	1.1074e-103	1.1835e-101	GTSE1	1.21029	0.109709	11.0318	2.68488e-28	5.57747e-27
SEZ6	2.27418	0.271035	8.39074	4.83098e-17	2.83117e-16	SEMA3C	-1.57079	0.116062	-13.5341	9.84287e-42	4.52856e-40
LIMCH1	-1.1645	0.107492	-10.8333	2.39319e-27	2.27149e-26	CELSR1	-2.01189	0.109409	-18.3887	1.61695e-75	4.25049e-73
DLX3	1.46855	0.157757	9.30889	1.29177e-20	9.0365e-20	ADD2	1.9849	0.15755	12.5985	2.15132e-36	7.17565e-35
WISP2	-1.60209	0.160766	-9.96533	2.16161e-23	1.72802e-22	FGF4	-2.58218	0.667966	-3.86574	0.000110751	0.000310857
DMRT3	-1.3036	0.142453	-9.15108	5.63663e-20	3.82841e-19	CACNG5	1.04896	0.293869	3.56947	0.000357706	0.000931093
ATP2C2	1.24947	0.125837	9.92931	3.10397e-23	2.46289e-22	CACNG4	-2.09649	0.177291	-11.8252	2.89258e-32	7.6161e-31
NGFR	-1.96178	0.161896	-12.1175	8.52747e-34	1.06327e-32	FSCN1	1.90293	0.112367	16.935	2.48424e-64	3.83527e-62
LPAR2	1.13872	0.0756303	15.0563	3.1364e-51	7.33301e-50	ATP12A	1.37228	0.263738	5.2032	1.95883e-07	7.77567e-07
SNCAIP	-1.09606	0.133471	-8.21201	2.17509e-16	1.23616e-15	TUBA3D	-3.42848	0.210705	-16.2715	1.57262e-59	1.91675e-57
BCAS1	2.43397	0.189382	12.8522	8.36075e-38	1.21587e-36	PAX2	-2.07187	0.234135	-8.84906	8.8262e-19	9.61961e-18
CALCRL	-1.05542	0.10134	-10.4146	2.12682e-25	1.85104e-24	RGS11	-2.10112	0.14895	-14.1062	3.47703e-45	1.9369e-43
NTHL1	1.24787	0.0975826	12.7878	1.9177e-37	2.75131e-36	SLC46A1	-1.20411	0.0877979	-13.7146	8.30308e-43	4.06225e-41
GLP2R	-3.58459	0.201613	-17.7796	1.01705e-70	4.2458e-69	ACACB	-1.20577	0.121305	-9.93996	2.78925e-23	4.13297e-22
MCM10	3.16078	0.134401	23.5176	2.6968e-122	4.4995e-120	CTTNBP2	-1.82586	0.157295	-11.6079	3.7575e-31	9.17784e-30
ERBB3	1.04166	0.0861982	12.0845	1.27555e-33	1.58201e-32	RARB	1.15176	0.106556	10.809	3.12157e-27	6.0432e-26
MYLK	-2.20326	0.109987	-20.032	2.89769e-89	2.12781e-87	PAK3	1.46909	0.154708	9.49589	2.18338e-21	2.82921e-20
TMEM206	1.41334	0.0699967	20.1916	1.16131e-90	8.90073e-89	CAPN6	3.63772	0.245267	14.8316	9.14646e-50	6.66869e-48
COL17A1	-2.8504	0.206164	-13.8259	1.77803e-43	3.17496e-42	DCX	1.6772	0.299644	5.59732	2.17688e-08	9.56918e-08
ME1	-1.59681	0.145183	-10.9986	3.88233e-28	3.82786e-27	SPAG6	-4.1869	0.313107	-13.3721	8.80103e-41	3.85241e-39
MTHFD2	1.47292	0.0753558	19.5462	4.44425e-85	2.91833e-83	SMC1B	1.98807	0.198819	9.99939	1.53335e-23	2.32444e-22
CTNNA2	2.2845	0.285448	8.00318	1.21244e-15	6.62205e-15	MAP2	2.1394	0.143485	14.9102	2.82696e-50	2.12814e-48
TIE1	-1.17792	0.0829624	-14.1983	9.38894e-46	1.82756e-44	AMPH	-2.00501	0.168448	-11.9028	1.14382e-32	3.08172e-31
ASPM	3.54033	0.125863	28.1285	4.3945e-174	2.5065e-171	MCCC1	1.14723	0.0733714	15.636	4.14067e-55	4.03537e-53
MPPED2	-1.17594	0.153228	-7.67446	1.66123e-14	8.5228e-14	LAMP3	2.04947	0.156758	13.0741	4.62951e-39	1.8289e-37
KIF26A	-1.31483	0.109633	-11.993	3.86567e-33	4.70752e-32	RBFOX1	-1.18784	0.283165	-4.19487	2.73026e-05	8.35589e-05
ACSM2B	-2.78716	0.2147	-12.9816	1.55504e-38	2.31778e-37	FGF20	-1.58454	0.207863	-7.623	2.47856e-14	1.91234e-13
KLF6	-1.31794	0.0759753	-17.347	2.07797e-67	7.85273e-66	BPIFB2	-3.1747	0.286398	-11.0849	1.48506e-28	3.13048e-27
PLPP1	-1.77157	0.0751924	-23.5605	9.8059e-123	1.6644e-120	OSBPL6	-1.40911	0.129176	-10.9085	1.04979e-27	2.10092e-26
SYT1	2.9904	0.227429	13.1487	1.73119e-39	2.67039e-38	CEACAM1	1.1792	0.139435	8.45697	2.74419e-17	2.67172e-16
ROGDI	1.50332	0.0813315	18.4839	2.78561e-76	1.4e-74	DUSP13	-3.27078	0.253387	-12.9083	4.04281e-38	1.50081e-36
ATP2B3	1.52694	0.262992	5.80603	6.39697e-09	2.28639e-08	LIPE	-1.12356	0.153838	-7.30352	2.80327e-13	1.9706e-12
FGFR3	2.36496	0.169208	13.9767	2.16376e-44	4.0097e-43	SCGN	-2.18275	0.29084	-7.505	6.1427e-14	4.57676e-13
IFI35	1.01453	0.0983393	10.3167	5.92377e-25	5.04642e-24	RIMS1	-2.0792	0.232498	-8.94286	3.79227e-19	4.22502e-18
ACSL4	-1.18679	0.0925418	-12.8244	1.19784e-37	1.73221e-36	DDX43	1.15656	0.203566	5.68149	1.33528e-08	5.99429e-08
PRR11	2.58918	0.127744	20.2686	2.43678e-91	1.89427e-89	EPHA6	-1.49182	0.239329	-6.23333	4.56623e-10	2.38544e-09
REEP1	1.19731	0.144776	8.27003	1.3393e-16	7.67739e-16	SLC4A4	-1.26642	0.215064	-5.88859	3.89494e-09	1.85102e-08
STON1-GTF2A1L	-2.27163	0.16171	-14.0475	7.97699e-45	1.50322e-43	PIH1D3	-2.25427	0.290384	-7.76306	8.29059e-15	6.63998e-14
PYGM	-3.35962	0.11403	-29.4625	8.7131e-191	7.4982e-188	PUM3	1.0287	0.0635286	16.1928	5.67061e-59	6.75901e-57
PAGE1	2.81006	0.779805	3.60354	0.000313914	0.000724924	IGSF9B	-2.01587	0.15479	-13.0233	9.0191e-39	3.48101e-37
PITX1	3.79618	0.164364	23.0962	5.0581e-118	7.6108e-116	NDC80	1.37073	0.111039	12.3445	5.21579e-35	1.61149e-33
TRPC7	1.5574	0.418005	3.72579	0.000194707	0.000461122	AFP	-2.62177	0.288289	-9.09422	9.5264e-20	1.10541e-18
ADGRF5	-1.929	0.0839977	-22.9649	1.0471e-116	1.5241e-114	COL4A4	1.17968	0.151743	7.77417	7.59443e-15	6.09547e-14
BCL3	1.02672	0.0779443	13.1725	1.26389e-39	1.95882e-38	CDH7	-2.9193	0.296874	-9.83347	8.07876e-23	1.15757e-21
ABCC9	-2.33154	0.110168	-21.1636	2.068e-99	2.0008e-97	PKP1	2.34441	0.223074	10.5096	7.80632e-26	1.3845e-24
GAL	2.4103	0.220068	10.9525	6.46044e-28	6.29264e-27	LRP2	-1.64924	0.238369	-6.91885	4.55332e-12	2.87128e-11
DRD4	1.45933	0.131854	11.0678	1.79741e-28	1.79969e-27	ATP8B1	-1.37676	0.0865998	-15.8979	6.54773e-57	6.9983e-55
TGFBR3	-2.47885	0.145551	-17.0308	4.85254e-65	1.71861e-63	IL12RB2	2.98265	0.201011	14.8383	8.28489e-50	6.07696e-48
PLA2G10	1.81377	0.157058	11.5484	7.52189e-31	8.31374e-30	PGR	-4.94597	0.225379	-21.9451	9.6386e-107	1.2019e-103
HES2	1.8604	0.187697	9.91176	3.70087e-23	2.92374e-22	C1QTNF3	-1.07515	0.139869	-7.68683	1.50823e-14	1.18378e-13
SCT	4.23109	0.181448	23.3185	2.8806e-120	4.5292e-118	COL19A1	1.71991	0.261753	6.57076	5.00589e-11	2.86637e-10
SPTB	-1.667	0.129502	-12.8723	6.44284e-38	9.41419e-37	OPRK1	2.92739	0.33574	8.71922	2.8013e-18	2.93853e-17
FRMPD1	-1.18494	0.158663	-7.46829	8.12407e-14	3.99741e-13	SEMA5B	1.21747	0.107725	11.3016	1.28784e-29	2.89547e-28
ASNS	1.0303	0.0964231	10.6852	1.19366e-26	1.09853e-25	LINC01587	2.24473	0.263944	8.50457	1.82271e-17	1.79688e-16
PTPN21	-1.42556	0.0855679	-16.66	2.55861e-62	8.31157e-61	PLOD1	1.46268	0.076746	19.0587	5.56347e-81	1.82809e-78
CAMK2A	1.18818	0.126961	9.35862	8.07824e-21	5.70889e-20	P2RX5	1.4944	0.180929	8.25959	1.4617e-16	1.34272e-15
EPHA8	3.5826	0.254271	14.0897	4.39428e-45	8.37081e-44	FAT1	1.10666	0.12369	8.94701	3.65249e-19	4.07676e-18
SLC12A3	1.26209	0.180444	6.99436	2.66473e-12	1.2005e-11	HAL	-1.30237	0.192329	-6.77158	1.27384e-11	7.69348e-11
TRPM5	2.52867	0.239569	10.5551	4.81248e-26	4.32111e-25	GSTP1	1.57688	0.139054	11.3401	8.3051e-30	1.88732e-28
ARHGAP10	-1.36073	0.0862648	-15.7739	4.70819e-56	1.2809e-54	FAM234B	-2.54528	0.148629	-17.125	9.65666e-66	1.59191e-63
TRIP13	2.56597	0.112445	22.8198	2.9188e-115	4.1023e-113	SLCO1A2	3.67795	0.301392	12.2032	2.98839e-34	8.86689e-33
ATP6AP1	1.21038	0.0609229	19.8673	7.80267e-88	5.54691e-86	NKAIN1	-2.93859	0.205646	-14.2895	2.5428e-46	1.52854e-44
PRLH	3.13338	0.291917	10.7338	7.06469e-27	6.57067e-26	CD82	1.1	0.103722	10.6052	2.81837e-26	5.15263e-25
MYO3B	2.39893	0.218957	10.9562	6.20836e-28	6.05794e-27	OVGP1	-1.15835	0.111439	-10.3945	2.62693e-25	4.50777e-24
CYBRD1	-1.1293	0.12436	-9.08088	1.07701e-19	7.21912e-19	TTC39A	-1.6348	0.11246	-14.5367	7.09385e-48	4.71285e-46
SLC6A15	1.0391	0.318139	3.2662	0.00109002	0.00235614	ORC1	1.29904	0.108183	12.0078	3.23264e-33	8.99352e-32
LIMS2	-1.9787	0.0938588	-21.0816	1.17229e-98	1.1101e-96	RAD54L	1.36503	0.107256	12.7268	4.1952e-37	1.46564e-35
ASIC4	1.03838	0.163115	6.36597	1.94054e-10	7.73883e-10	FOLH1	1.41292	0.138524	10.1998	1.98696e-24	3.20703e-23
TFRC	1.11074	0.101902	10.9	1.15239e-27	1.10946e-26	HBQ1	2.55193	0.320032	7.974	1.53625e-15	1.30179e-14
SREBF1	1.1635	0.105145	11.0657	1.84094e-28	1.84252e-27	CEACAM6	-2.56332	0.260542	-9.8384	7.69224e-23	1.10283e-21
HMMR	3.04338	0.107074	28.4231	1.0485e-177	6.6794e-175	FAT2	1.27519	0.201878	6.31663	2.67335e-10	1.42819e-09
TRHDE	-4.0238	0.209963	-19.1643	7.34951e-82	4.32783e-80	ERO1B	-1.00962	0.12549	-8.04546	8.59232e-16	7.43908e-15
MRVI1	-1.07498	0.0882058	-12.1871	3.64012e-34	4.61145e-33	HSD17B2	1.56782	0.249927	6.27311	3.53897e-10	1.86722e-09
CYP2W1	1.71507	0.242662	7.06772	1.57498e-12	7.20201e-12	MYBPC2	2.00214	0.185163	10.8128	2.99314e-27	5.80149e-26
MCM2	1.78367	0.090437	19.7228	1.37302e-86	9.36709e-85	PTHLH	-1.73129	0.20568	-8.4174	3.84942e-17	3.7121e-16
PANX2	1.77482	0.149083	11.9049	1.11538e-32	1.33118e-31	DNMT3B	1.08118	0.11182	9.66897	4.08458e-22	5.60331e-21
TP63	-2.60218	0.179631	-14.4863	1.47972e-47	3.07426e-46	REM1	1.72579	0.121236	14.2349	5.56216e-46	3.24722e-44
LLGL2	1.74872	0.0824661	21.2054	8.5228e-100	8.31136e-98	TPX2	1.25542	0.114415	10.9725	5.18077e-28	1.0586e-26
FERMT2	-1.92937	0.0825888	-23.3611	1.062e-120	1.7135e-118	SLC15A1	4.4573	0.265421	16.7933	2.7303e-63	3.98731e-61
ABCB11	-1.91657	0.226838	-8.44908	2.93599e-17	1.73933e-16	DOCK3	1.19494	0.177508	6.73175	1.67632e-11	1.00013e-10
DHRS9	-1.09873	0.162699	-6.75315	1.44665e-11	6.23069e-11	C3orf18	-1.20649	0.0935374	-12.8985	4.5907e-38	1.69386e-36
PTGS2	-1.52435	0.218652	-6.97157	3.13431e-12	1.40637e-11	TMEM40	1.46653	0.209268	7.00792	2.41885e-12	1.56674e-11
MRPS34	1.3848	0.0770492	17.973	3.17202e-72	1.39047e-70	SMOX	1.23141	0.112062	10.9886	4.33628e-28	8.89404e-27
PPP2R2C	3.47741	0.209295	16.6149	5.43985e-62	1.7555e-60	SLC4A11	1.75974	0.160667	10.9527	6.44605e-28	1.30943e-26
CDHR2	1.62928	0.130857	12.4508	1.38444e-35	1.85647e-34	EBF4	-1.16931	0.125066	-9.34957	8.8005e-21	1.1002e-19
SNCB	1.89716	0.246768	7.68802	1.49424e-14	7.67973e-14	LZTS3	1.49455	0.13018	11.4807	1.65034e-30	3.88846e-29
ATP2A3	1.59779	0.128598	12.4246	1.92124e-35	2.56228e-34	SIRPG	1.06771	0.167819	6.3623	1.98756e-10	1.07492e-09
CA12	1.74302	0.15944	10.9321	8.0945e-28	7.84841e-27	CFAP61	-2.97191	0.135872	-21.8728	4.7142e-106	5.4585e-103
MGLL	-2.2219	0.109447	-20.3012	1.2551e-91	9.81899e-90	LHX5	3.14084	0.320915	9.78716	1.27833e-22	1.80927e-21
SLC12A1	1.36447	0.244664	5.57689	2.44854e-08	8.38376e-08	KIF16B	-1.32932	0.090878	-14.6275	1.87525e-48	1.28625e-46
WSCD2	-1.84588	0.188426	-9.79626	1.16828e-22	8.99352e-22	CHGB	-3.75086	0.32445	-11.5607	6.52109e-31	1.57775e-29
SEMA3A	-1.71887	0.117042	-14.686	7.93131e-49	1.71613e-47	NOS1	1.32148	0.187963	7.0305	2.05791e-12	1.34225e-11
GTSE1	3.03786	0.11455	26.5199	5.7112e-155	1.8676e-152	FXYD5	1.01597	0.104944	9.68106	3.62931e-22	4.99426e-21
CELSR1	1.53786	0.117463	13.0923	3.64445e-39	5.55869e-38	BIRC5	1.12409	0.130101	8.64017	5.61314e-18	5.75892e-17
FGF4	2.39492	0.683145	3.50572	0.000455375	0.00103183	LAG3	1.30138	0.157671	8.25378	1.53468e-16	1.40711e-15
CACNG5	1.74332	0.341882	5.09918	3.41131e-07	1.0602e-06	ANKRD24	-1.40576	0.127801	-10.9996	3.83809e-28	7.89553e-27
CACNG4	2.3795	0.175988	13.5208	1.17946e-41	1.95786e-40	ICAM1	1.1535	0.109158	10.5672	4.22728e-26	7.64794e-25
PLD1	-1.03235	0.10475	-9.85537	6.49753e-23	5.0598e-22	FETUB	2.67797	0.359253	7.45428	9.03596e-14	6.64391e-13
WDR62	2.87071	0.10127	28.347	9.1128e-177	5.5875e-174	P3H2	1.11981	0.117352	9.54228	1.39729e-21	1.83951e-20
TUBA3D	2.94861	0.210775	13.9894	1.81005e-44	3.36059e-43	THPO	-3.38861	0.175619	-19.2952	5.8897e-83	2.09067e-80
PAX2	2.5032	0.231537	10.8112	3.04569e-27	2.87801e-26	CHRD	-2.84461	0.151545	-18.7707	1.31091e-78	4.0095e-76
MCM6	1.02712	0.0733153	14.0096	1.36107e-44	2.54046e-43	DLL3	1.93962	0.238182	8.14344	3.84202e-16	3.41574e-15
RBMS2	-1.14114	0.0526228	-21.6853	2.8213e-104	3.055e-102	POU4F3	-1.21739	0.200997	-6.05677	1.38883e-09	6.92508e-09
SPAG5	2.81122	0.107379	26.1805	4.4361e-151	1.3268e-148	NRCAM	-1.07706	0.186305	-5.78113	7.41998e-09	3.41835e-08
TPD52	1.87754	0.0937178	20.034	2.78565e-89	2.0486e-87	SLC26A3	-1.96286	0.2625	-7.47756	7.57135e-14	5.60515e-13
ACACB	-3.62769	0.12268	-29.5703	3.5969e-192	3.2673e-189	ITGA6	1.40784	0.11217	12.5509	3.93083e-36	1.28727e-34
TRAF4	1.03356	0.0872596	11.8447	2.29287e-32	2.6926e-31	SMPX	3.45555	0.318411	10.8525	1.94098e-27	3.81998e-26
MCAM	-2.18191	0.0857326	-25.4501	7.0347e-143	1.7696e-140	SEL1L3	1.29591	0.122694	10.5622	4.46288e-26	8.05621e-25
GPC4	1.13878	0.121897	9.34214	9.4402e-21	6.65221e-20	TF	2.98313	0.216422	13.7839	3.18756e-43	1.60803e-41
CAMSAP3	1.09774	0.0892203	12.3037	8.65372e-35	1.12475e-33	PITPNM3	1.07182	0.126712	8.45872	2.70333e-17	2.63459e-16
STXBP2	1.43923	0.0808286	17.8059	6.35814e-71	2.67478e-69	ORC6	1.24095	0.120409	10.3061	6.61524e-25	1.10286e-23
NMRK2	-2.03498	0.265892	-7.65341	1.95725e-14	9.99554e-14	ESR1	-5.33099	0.16802	-31.7284	6.3095e-221	3.0684e-216
CTTNBP2	-1.34255	0.150323	-8.93107	4.21892e-19	2.73486e-18	TMEM101	-1.14502	0.133094	-8.60315	7.75606e-18	7.86621e-17
ACTL6B	1.80244	0.326805	5.51535	3.48077e-08	1.17524e-07	CMA1	-1.16837	0.207827	-5.62181	1.88962e-08	8.35855e-08
UBE2T	3.21845	0.105424	30.5285	1.0903e-204	1.4074e-201	MYH7	1.68214	0.295916	5.68453	1.3117e-08	5.89333e-08
PPP1R12B	-2.07829	0.0766052	-27.1298	4.3834e-162	1.734e-159	SLC7A8	-2.25786	0.110835	-20.3714	3.00066e-92	1.78914e-89
PAK3	-2.55269	0.150903	-16.9161	3.42136e-64	1.17524e-62	SLC22A17	-1.02856	0.13155	-7.81882	5.33228e-15	4.3349e-14
SPAG6	2.44263	0.29894	8.17096	3.05952e-16	1.7256e-15	TGM1	1.67654	0.148677	11.2764	1.71684e-29	3.8334e-28
APBB1IP	-1.24936	0.0956524	-13.0615	5.46684e-39	8.27909e-38	DAZL	2.10586	0.25252	8.33937	7.46896e-17	7.03375e-16
TYR	1.16895	0.303297	3.85414	0.000116137	0.000282158	PHGDH	2.29297	0.151169	15.1682	5.73918e-52	4.66726e-50
ACTN2	2.55458	0.232659	10.98	4.77096e-28	4.6805e-27	COL9A3	3.88009	0.194952	19.9028	3.84869e-88	1.81714e-85
NAALAD2	-2.88466	0.10264	-28.1045	8.6258e-174	4.8081e-171	TEKT2	-1.25111	0.16485	-7.58939	3.21423e-14	2.45502e-13
JADE1	-1.06843	0.0593822	-17.9925	2.23226e-72	9.838e-71	UNC13D	1.44097	0.124097	11.6116	3.59958e-31	8.80982e-30
SMC1B	2.32343	0.194311	11.9572	5.95033e-33	7.20681e-32	CDC45	1.12091	0.119062	9.41447	4.75474e-21	6.04043e-20
FBLN1	-1.04338	0.107975	-9.66315	4.32374e-22	3.24641e-21	AC016026.1	1.05451	0.147627	7.14307	9.12663e-13	6.13374e-12
LAMP3	1.98907	0.172929	11.5022	1.28595e-30	1.41083e-29	VNN3	1.84397	0.283569	6.50271	7.88854e-11	4.435e-10
FAP	1.65022	0.110803	14.8932	3.64628e-50	8.23249e-49	GABRP	4.12331	0.25376	16.2488	2.27671e-59	2.76797e-57
HOXA9	-1.40425	0.174768	-8.03492	9.36415e-16	5.14137e-15	KRT31	-2.32532	0.310897	-7.47941	7.46585e-14	5.52873e-13
EDN1	-1.30517	0.135675	-9.61982	6.5946e-22	4.91459e-21	FMO2	1.69745	0.175244	9.68617	3.45227e-22	4.76276e-21
ADCYAP1R1	-2.86645	0.129527	-22.1301	1.6239e-108	1.9148e-106	MAP3K1	-1.06632	0.0929837	-11.4679	1.91346e-30	4.48666e-29
P2RY10	1.3589	0.159713	8.50837	1.76393e-17	1.05582e-16	CYP26A1	-1.27568	0.199127	-6.40634	1.49051e-10	8.14985e-10
ITM2A	-2.30723	0.118871	-19.4096	6.40581e-84	4.0492e-82	TDRD1	1.10621	0.283238	3.90558	9.39996e-05	0.00026661
BRINP1	-1.79103	0.215588	-8.30762	9.76411e-17	5.63138e-16	CRTAC1	1.09295	0.199494	5.47858	4.28742e-08	1.8288e-07
BPIFB2	1.0532	0.273278	3.85395	0.000116229	0.000282338	MYO3A	1.40194	0.227157	6.17168	6.75665e-10	3.46899e-09
RUNX1T1	-1.74814	0.107953	-16.1935	5.60303e-59	1.65661e-57	TPSD1	-1.39265	0.252986	-5.50484	3.69504e-08	1.58488e-07
SLC1A3	-1.39045	0.107923	-12.8838	5.55494e-38	8.13618e-37	KCNK16	-2.31075	0.47798	-4.83442	1.33534e-06	4.80707e-06
SP140	1.35228	0.130352	10.374	3.25537e-25	2.80884e-24	CRISP3	-1.13146	0.318298	-3.55471	0.000378391	0.000981363
TNS1	-3.06009	0.0883177	-34.6487	4.6747e-263	2.5478e-259	NCR2	2.35443	0.304528	7.73139	1.06378e-14	8.4365e-14
RAPGEF3	-1.66612	0.102257	-16.2934	1.10024e-59	3.32118e-58	MLN	1.65133	0.247243	6.67895	2.40662e-11	1.41468e-10
DUSP13	3.64521	0.251617	14.4871	1.46079e-47	3.03751e-46	CDC7	1.10996	0.0954502	11.6286	2.9474e-31	7.23915e-30
LIPE	-4.50199	0.157221	-28.6347	2.4839e-180	1.6245e-177	PRTFDC1	1.83332	0.115272	15.9043	5.91873e-57	6.33995e-55
PAFAH1B3	2.47643	0.0889835	27.8302	1.8718e-170	8.914e-168	TSPAN15	-1.01582	0.0909938	-11.1636	6.1446e-29	1.32455e-27
KIF22	1.46059	0.0661893	22.0669	6.5785e-108	7.7014e-106	CATSPERG	-1.03399	0.102066	-10.1306	4.04182e-24	6.37968e-23
PGM1	-1.27487	0.0816736	-15.6093	6.28984e-55	1.64901e-53	PCDH11Y	1.20749	0.392881	3.07342	0.00211619	0.00486194
EPB41L2	-1.65307	0.0884814	-18.6827	6.84448e-78	3.58692e-76	PRKY	1.80138	0.296821	6.06891	1.28784e-09	6.4413e-09
RIMS1	1.45826	0.216807	6.72609	1.74288e-11	7.47109e-11	IGFALS	-3.46961	0.191176	-18.1488	1.31328e-73	3.16168e-71
MOXD1	1.15635	0.130583	8.85528	8.34748e-19	5.32044e-18	MISP	-2.15494	0.150021	-14.3642	8.67516e-47	5.36063e-45
DCT	-2.48562	0.235896	-10.5369	5.83622e-26	5.2212e-25	HCN2	-1.03349	0.175655	-5.8836	4.01443e-09	1.90464e-08
CRYBG3	-1.84604	0.128023	-14.4197	3.89229e-47	7.97513e-46	PALM	-1.1398	0.110232	-10.34	4.64779e-25	7.8536e-24
SCTR	-2.94809	0.157512	-18.7166	3.62444e-78	1.91994e-76	SLC7A4	-2.28667	0.276768	-8.26203	1.43214e-16	1.31682e-15
SLC4A4	-1.07036	0.241496	-4.4322	9.3277e-06	2.54544e-05	SEC14L2	-1.71228	0.165025	-10.3759	3.19278e-25	5.45375e-24
PIH1D3	2.30815	0.301538	7.65461	1.93894e-14	9.90923e-14	SEC14L3	1.00196	0.255432	3.92263	8.75893e-05	0.000249564
NDC80	3.20425	0.117527	27.2641	1.1314e-163	4.6246e-161	PRODH	-1.20693	0.217467	-5.54994	2.8577e-08	1.2405e-07
CXCL2	-3.42949	0.181403	-18.9054	1.02974e-79	5.70097e-78	PLA2G3	-1.45289	0.302094	-4.80939	1.51388e-06	5.41733e-06
AFP	-1.34968	0.290721	-4.64252	3.44182e-06	9.77353e-06	SEZ6L	-4.45013	0.253287	-17.5695	4.21977e-69	8.14332e-67
CDH7	3.4997	0.282797	12.3753	3.55457e-35	4.68959e-34	GGTLC2	2.43546	0.27888	8.73299	2.48025e-18	2.61132e-17
MEF2C	-1.37937	0.0821992	-16.7808	3.36989e-63	1.12296e-61	MICALL1	1.46105	0.0726108	20.1217	4.76847e-90	2.63517e-87
CDC14B	-1.80961	0.0822691	-21.9963	3.1266e-107	3.6086e-105	POLR2F	3.48474	0.188645	18.4725	3.43767e-76	9.4987e-74
PCDHB4	-1.10238	0.117581	-9.37551	6.88409e-21	4.87693e-20	2020-09-03	1.57722	0.157526	10.0124	1.3444e-23	2.04503e-22
PCDHGA2	-1.10481	0.148321	-7.4488	9.41922e-14	4.62216e-13	SLC5A1	1.02	0.239822	4.25315	2.1078e-05	6.55023e-05
IL12RB2	1.29292	0.21357	6.05387	1.41409e-09	5.30507e-09	TIMP3	-1.03475	0.13431	-7.70423	1.31631e-14	1.03683e-13
COBLL1	-1.29697	0.0922302	-14.0623	6.47539e-45	1.22354e-43	MIOX	1.02299	0.176649	5.79106	6.99441e-09	3.23056e-08
OPRK1	1.08064	0.311073	3.47392	0.000512919	0.00115496	NEFH	1.06625	0.19986	5.33499	9.55491e-08	3.91527e-07
LINC01587	1.05417	0.243657	4.32643	1.51548e-05	4.05284e-05	RASD2	2.27217	0.137101	16.573	1.09266e-61	1.48014e-59
TRPM3	-2.71728	0.152659	-17.7997	7.1013e-71	2.9823e-69	ACR	1.51439	0.132639	11.4174	3.42411e-30	7.93698e-29
P2RX5	1.74397	0.18044	9.66508	4.243e-22	3.18823e-21	PNPLA5	1.60347	0.428479	3.74224	0.000182387	0.000496205
EPYC	6.05294	0.232306	26.0559	1.1526e-149	3.3256e-147	PVALB	-6.26395	0.307492	-20.3711	3.01679e-92	1.78914e-89
FAM234B	1.64686	0.155227	10.6094	2.69495e-26	2.44485e-25	CSF2RB	1.1472	0.119651	9.58782	8.99644e-22	1.2026e-20
SLCO1A2	-2.39713	0.305765	-7.83978	4.51353e-15	2.39168e-14	MLC1	3.50448	0.227913	15.3764	2.35569e-53	2.07536e-51
NKAIN1	3.95812	0.206968	19.1243	1.58429e-81	9.24047e-80	CTSG	-1.42304	0.196772	-7.23192	4.76221e-13	3.27615e-12
APOB	-5.45816	0.223266	-24.4469	5.4284e-132	1.1379e-129	GZMB	1.91826	0.185874	10.3202	5.7076e-25	9.57455e-24
EFR3B	1.24036	0.128144	9.67941	3.68849e-22	2.77667e-21	COCH	2.04341	0.219068	9.32775	1.0814e-20	1.34225e-19
MECOM	-1.20681	0.0946939	-12.7444	3.35087e-37	4.76011e-36	TRIM9	-1.02998	0.171419	-6.00853	1.87209e-09	9.20634e-09
IGSF9	1.97218	0.102963	19.1541	8.93741e-82	5.244e-80	LRRC74A	1.20957	0.18853	6.4158	1.40084e-10	7.68033e-10
ABCB1	-1.99567	0.120187	-16.6047	6.44872e-62	2.07289e-60	SAMD15	-1.90638	0.109979	-17.334	2.6038e-67	4.53854e-65
WNT11	-1.2854	0.190791	-6.73718	1.61489e-11	6.93578e-11	CHGA	-4.27065	0.338807	-12.605	1.98252e-36	6.63081e-35
TTC39A	1.38388	0.118797	11.6492	2.31665e-31	2.61413e-30	GALNT16	-1.11934	0.150431	-7.44091	9.99971e-14	7.31933e-13
ORC1	2.2709	0.115968	19.5822	2.19274e-85	1.45743e-83	SERPINA4	-2.05729	0.240596	-8.55081	1.22232e-17	1.21858e-16
RAD54L	2.77768	0.115824	23.9818	4.3055e-127	8.2497e-125	TCL1A	1.99178	0.262849	7.57767	3.51808e-14	2.67576e-13
NME8	1.10061	0.133932	8.21763	2.07565e-16	1.18046e-15	DHRS2	-1.98921	0.301176	-6.6048	3.98044e-11	2.29597e-10
EPDR1	-1.8405	0.107486	-17.1231	9.98147e-66	3.62407e-64	NFATC4	-1.49021	0.117911	-12.6384	1.29687e-36	4.40403e-35
CEACAM6	4.68394	0.250862	18.6714	8.45938e-78	4.41906e-76	MYBL2	1.42082	0.149119	9.52806	1.60243e-21	2.09652e-20
FAT2	-2.35394	0.186104	-12.6486	1.13932e-36	1.5931e-35	RIMS4	-3.92227	0.240862	-16.2843	1.27572e-59	1.56271e-57
HSD17B2	-1.02825	0.232197	-4.42837	9.49473e-06	2.58923e-05	DOK5	1.50369	0.123898	12.1365	6.7637e-34	1.97553e-32
PPEF1	1.54998	0.132167	11.7274	9.22382e-32	1.0591e-30	SLCO4A1	1.22955	0.155494	7.90733	2.62969e-15	2.18756e-14
PPP1R15A	-1.24846	0.0813494	-15.3468	3.71855e-53	9.16595e-52	NTSR1	1.25828	0.236722	5.31546	1.06389e-07	4.34408e-07
BAX	1.1512	0.0687508	16.7446	6.20561e-63	2.0512e-61	EEF1A2	-2.22164	0.217112	-10.2327	1.41555e-24	2.30929e-23
CETP	-2.29031	0.113184	-20.2352	4.79191e-91	3.71331e-89	SPEF1	-2.65711	0.144393	-18.4019	1.26795e-75	3.35117e-73
MT3	2.49165	0.267781	9.30481	1.34226e-20	9.383e-20	CDC25B	1.09027	0.102069	10.6817	1.23965e-26	2.31244e-25
LPCAT2	-1.22573	0.084672	-14.4762	1.71259e-47	3.55054e-46	RSPO4	2.28475	0.225777	10.1195	4.52703e-24	7.11092e-23
AURKA	3.12107	0.111881	27.8963	2.9609e-171	1.438e-168	PROKR2	4.04227	0.443904	9.10617	8.53443e-20	9.93151e-19
RFX2	-1.00559	0.0782776	-12.8464	9.00578e-38	1.30734e-36	SNPH	-1.24688	0.179346	-6.9524	3.59133e-12	2.28839e-11
SULT2B1	1.01407	0.151493	6.69387	2.17341e-11	9.24872e-11	FERMT1	2.63437	0.199615	13.1973	9.09615e-40	3.76152e-38
DNMT3B	1.53237	0.106811	14.3466	1.11865e-46	2.24885e-45	HAO1	4.956	0.42936	11.5428	8.03115e-31	1.92775e-29
TPX2	3.57961	0.11523	31.0649	7.1874e-212	1.1752e-208	PDYN	1.6504	0.31841	5.18325	2.18047e-07	8.60075e-07
FER1L4	1.52625	0.149349	10.2193	1.62464e-24	1.35831e-23	BPI	4.17112	0.215895	19.3201	3.63916e-83	1.32072e-80
PDRG1	1.13904	0.0720374	15.8117	2.58203e-56	7.08751e-55	CST9L	-6.6999	0.415236	-16.1352	1.44381e-58	1.67976e-56
SLC15A1	2.15572	0.271461	7.94118	2.00271e-15	1.08e-14	SLC32A1	1.15241	0.350201	3.2907	0.000999383	0.0024216
C20orf194	-1.18863	0.0606501	-19.5982	1.60147e-85	1.06733e-83	CST3	-1.03726	0.104302	-9.94482	2.65643e-23	3.94939e-22
TESC	-1.743	0.156982	-11.1031	1.21109e-28	1.22361e-27	ASIP	1.20106	0.139415	8.61494	6.99772e-18	7.1164e-17
SIRPG	1.68005	0.16458	10.2082	1.82301e-24	1.51975e-23	CST4	-5.42519	0.292199	-18.5668	5.97075e-77	1.68816e-74
CFAP61	1.51758	0.149338	10.162	2.92886e-24	2.42067e-23	FAM83D	1.11016	0.134153	8.27527	1.28165e-16	1.18539e-15
LHX5	1.57105	0.340332	4.61623	3.90767e-06	1.10331e-05	EPPIN	1.41934	0.304713	4.65796	3.19357e-06	1.10029e-05
OAS1	1.49986	0.12259	12.2348	2.02672e-34	2.59636e-33	SYNDIG1	-1.07206	0.151431	-7.0795	1.44676e-12	9.55946e-12
CHGB	1.60048	0.310629	5.15237	2.5721e-07	8.08034e-07	CELF4	1.68297	0.199028	8.45597	2.76765e-17	2.69295e-16
NOS1	-1.97457	0.186708	-10.5758	3.86072e-26	3.48054e-25	ZNF516	-1.14462	0.109189	-10.4829	1.03499e-25	1.8263e-24
GRAMD1A	1.0709	0.0563735	18.9965	1.82192e-80	1.03556e-78	LIPG	1.81461	0.15448	11.7466	7.35479e-32	1.88149e-30
FXYD3	1.41102	0.114424	12.3315	6.12968e-35	8.01367e-34	LAMA1	1.02	0.140684	7.25026	4.15976e-13	2.88167e-12
BIRC5	3.54073	0.132543	26.7138	3.2529e-157	1.1158e-154	NOL4	2.82435	0.282931	9.98248	1.81863e-23	2.74154e-22
LAG3	2.03701	0.156932	12.9802	1.58453e-38	2.36101e-37	H2BFM	1.33451	0.414686	3.21811	0.00129039	0.0030713
OTUB2	1.07714	0.0791103	13.6156	3.23274e-42	5.48503e-41	MID1	1.64877	0.138034	11.9446	6.92812e-33	1.89069e-31
LTBP4	-1.91808	0.0910405	-21.0684	1.55009e-98	1.44828e-96	GUCY2F	1.9788	0.303959	6.5101	7.50997e-11	4.23342e-10
IRAK3	-1.17673	0.138373	-8.50401	1.83154e-17	1.09522e-16	GLRA2	1.37803	0.255393	5.39571	6.82528e-08	2.84617e-07
LYZ	1.39468	0.163629	8.52343	1.54895e-17	9.29637e-17	CACNA1F	-1.6553	0.162504	-10.1862	2.28578e-24	3.66743e-23
SI	1.32416	0.543913	2.43451	0.0149119	0.0275108	SYP	-1.94893	0.175671	-11.0942	1.33892e-28	2.831e-27
P3H2	-1.39849	0.127819	-10.9412	7.32186e-28	7.11051e-27	LUZP4	1.98587	0.359023	5.53133	3.17819e-08	1.37141e-07
THPO	1.78709	0.175108	10.2056	1.87121e-24	1.55914e-23	MTMR8	1.07491	0.122135	8.80101	1.35591e-18	1.45562e-17
CHRD	1.34028	0.153718	8.71909	2.80436e-18	1.74501e-17	PIM2	1.01409	0.104113	9.74023	2.03086e-22	2.84128e-21
CD209	-2.70979	0.142338	-19.0377	8.3063e-81	4.75982e-79	SCML2	1.29865	0.13351	9.72703	2.31238e-22	3.22864e-21
EFNB1	-1.01158	0.0733963	-13.7825	3.24841e-43	5.73789e-42	PCSK1N	1.84292	0.272021	6.77493	1.24469e-11	7.52212e-11
KIF4A	3.83766	0.114069	33.6434	3.8908e-248	1.735e-244	GATA1	-1.02063	0.166716	-6.12199	9.24151e-10	4.68394e-09
DLL3	2.71107	0.238418	11.3711	5.82526e-30	6.22258e-29	VGLL1	4.379	0.301659	14.5164	9.53824e-48	6.28529e-46
NAT14	1.70611	0.0973976	17.517	1.06371e-68	4.17083e-67	GABRE	2.06614	0.197131	10.4811	1.05527e-25	1.8614e-24
POU4F3	1.06041	0.197975	5.35632	8.49354e-08	2.77048e-07	MAGED2	-1.67096	0.0961009	-17.3875	1.02582e-67	1.81406e-65
NRCAM	1.08942	0.173872	6.26565	3.71265e-10	1.45307e-09	SYTL4	-1.7577	0.0981288	-17.9122	9.47664e-72	2.09481e-69
SLC26A3	-1.67089	0.273637	-6.10624	1.02004e-09	3.8655e-09	TAF7L	1.85927	0.141536	13.1364	2.03756e-39	8.2095e-38
ABCC6	-1.39232	0.144059	-9.6649	4.25049e-22	3.19288e-21	RUBCNL	1.2349	0.105187	11.74	7.95302e-32	2.02919e-30
MAP3K20	-1.49923	0.0807284	-18.5713	5.48253e-77	2.81013e-75	NALCN	1.35844	0.146719	9.25877	2.0681e-20	2.51398e-19
SMPX	1.06197	0.339431	3.12866	0.00175605	0.00369595	TNFSF13B	1.32585	0.113688	11.6622	1.98937e-31	4.92091e-30
TF	-2.188	0.235547	-9.28902	1.55708e-20	1.0843e-19	KLF5	1.67937	0.155998	10.7653	5.01985e-27	9.58087e-26
APOH	1.40764	0.607467	2.31723	0.0204914	0.0369865	FGF9	1.91971	0.231488	8.2929	1.10525e-16	1.02614e-15
NLRP1	-1.01375	0.0917854	-11.0447	2.32424e-28	2.31584e-27	SGCG	-2.48689	0.225164	-11.0448	2.32282e-28	4.83772e-27
ORC6	2.53144	0.120566	20.9963	7.08585e-98	6.53337e-96	ACOD1	1.69828	0.262417	6.47168	9.69209e-11	5.39966e-10
ZFHX4	-1.10197	0.121019	-9.10578	8.56514e-20	5.76636e-19	OLFM4	2.50563	0.333962	7.50276	6.24902e-14	4.65384e-13
CPA1	-4.13571	0.218884	-18.8946	1.26441e-79	6.99229e-78	MSLN	3.23389	0.298699	10.8266	2.57634e-27	5.01963e-26
ESR1	1.68654	0.188111	8.96568	3.0838e-19	2.01555e-18	GDPD3	-1.50063	0.183711	-8.16843	3.12428e-16	2.80223e-15
CD200	-1.25154	0.0812834	-15.3972	1.70948e-53	4.25651e-52	CBLN1	-1.23192	0.209705	-5.87452	4.2407e-09	2.00612e-08
CCDC80	-1.8169	0.122896	-14.7841	1.85597e-49	4.08429e-48	CCL17	1.13378	0.181239	6.25571	3.95724e-10	2.07823e-09
CMA1	-2.89726	0.192167	-15.0768	2.3033e-51	5.41618e-50	NDRG4	1.02946	0.131535	7.82655	5.01421e-15	4.08726e-14
JPH4	-1.19945	0.117759	-10.1856	2.29898e-24	1.90651e-23	SMPD3	-1.60237	0.138796	-11.5448	7.84082e-31	1.88486e-29
MYH7	1.29557	0.336525	3.84986	0.000118183	0.000286816	WFDC1	1.38873	0.135202	10.2715	9.47034e-25	1.55961e-23
CEBPE	1.05296	0.13401	7.85734	3.92373e-15	2.08704e-14	COTL1	1.40294	0.0917178	15.2963	8.09562e-53	6.89489e-51
SLC7A8	1.14316	0.121689	9.3941	5.77104e-21	4.10679e-20	SLC7A5	1.59541	0.151224	10.5499	5.084e-26	9.14006e-25
DAZL	2.08379	0.270915	7.69169	1.45202e-14	7.4651e-14	METRN	-1.13807	0.138506	-8.21675	2.091e-16	1.89857e-15
SEMA6A	-1.33519	0.122281	-10.9191	9.34624e-28	9.02998e-27	RHBDL1	-1.36254	0.146628	-9.29252	1.50674e-20	1.8499e-19
TYRO3	-2.14792	0.0954422	-22.5049	3.7176e-112	4.7988e-110	ZP2	4.05319	0.414685	9.77415	1.45369e-22	2.05209e-21
WDR76	1.30924	0.0758446	17.2622	9.06201e-67	3.34973e-65	PRSS33	5.38465	0.420309	12.8112	1.41963e-37	5.09506e-36
CAPN3	-1.19173	0.114977	-10.365	3.57727e-25	3.08062e-24	TOX3	-1.8099	0.177194	-10.2143	1.71163e-24	2.77739e-23
TBX15	-2.34219	0.101004	-23.1892	5.8578e-119	9.0357e-117	SYT17	-2.18632	0.139947	-15.6224	5.12064e-55	4.94091e-53
COL9A3	1.74527	0.205274	8.50211	1.8617e-17	1.11285e-16	TMC5	-1.53138	0.193754	-7.90373	2.70669e-15	2.24853e-14
EZR	1.28725	0.0662875	19.4192	5.30932e-84	3.36912e-82	SLC6A2	3.75611	0.26564	14.1399	2.15706e-45	1.21553e-43
CLSPN	2.85922	0.121305	23.5706	7.7269e-123	1.3206e-120	IQCH	-1.17305	0.0852685	-13.7571	4.61724e-43	2.29827e-41
UNC13D	1.10228	0.126893	8.68663	3.73354e-18	2.30885e-17	ACSBG1	1.20245	0.142862	8.41693	3.86494e-17	3.72632e-16
DPYSL2	-1.36384	0.077988	-17.4878	1.77504e-68	6.93225e-67	OCA2	3.96495	0.280129	14.154	1.764e-45	1.001e-43
GPATCH2	1.04024	0.0816993	12.7325	3.90212e-37	5.53199e-36	TGM5	2.29373	0.240349	9.54332	1.38337e-21	1.82217e-20
CDC45	2.88983	0.119051	24.2738	3.7093e-130	7.4877e-128	SGK3	-1.06447	0.139692	-7.62017	2.53345e-14	1.95314e-13
AC016026.1	-1.3934	0.139104	-10.017	1.283e-23	1.03373e-22	RP1	-3.0951	0.235513	-13.1419	1.89331e-39	7.66003e-38
VNN3	1.42651	0.27226	5.23952	1.60997e-07	5.13298e-07	CA2	-1.24235	0.201904	-6.15316	7.59533e-10	3.88155e-09
ECHDC1	-1.15314	0.0853339	-13.5132	1.30656e-41	2.16592e-40	EYA1	-1.23583	0.239304	-5.16427	2.41383e-07	9.47967e-07
KRT31	2.58759	0.301386	8.58561	9.03574e-18	5.49425e-17	TRPA1	-2.69956	0.261457	-10.3251	5.42875e-25	9.10993e-24
CDC6	2.99089	0.136693	21.8803	4.003e-106	4.483e-104	SFRP1	2.61154	0.226953	11.507	1.2168e-30	2.89503e-29
FMO2	-3.18709	0.167005	-19.0839	3.43844e-81	1.98193e-79	PLAT	-1.59052	0.156097	-10.1893	2.2135e-24	3.55851e-23
EPB41L4B	-1.1591	0.0913541	-12.688	6.8962e-37	9.70095e-36	GDAP1	-1.46732	0.15428	-9.51079	1.89219e-21	2.46567e-20
NANS	1.18892	0.0672588	17.6768	6.33182e-70	2.58178e-68	NDRG1	1.3297	0.134165	9.9109	3.73269e-23	5.47751e-22
BLNK	1.01695	0.0801381	12.69	6.71781e-37	9.45815e-36	NCALD	1.77527	0.140341	12.6497	1.12251e-36	3.82276e-35
TLL2	1.90836	0.133465	14.2986	2.23403e-46	4.45463e-45	ASAH1	-1.18035	0.103343	-11.4217	3.25629e-30	7.55157e-29
TDRD1	1.33925	0.261386	5.12364	2.99691e-07	9.36216e-07	KCNN4	2.43748	0.155199	15.7056	1.38505e-55	1.38025e-53
SORBS1	-3.61642	0.1124	-32.1744	4.0221e-227	1.2331e-223	TULP2	1.19477	0.130018	9.18927	3.955e-20	4.71758e-19
CRTAC1	-1.44372	0.20239	-7.13337	9.79417e-13	4.53059e-12	DHDH	1.29278	0.148647	8.69698	3.40841e-18	3.5501e-17
BAMBI	1.37304	0.151913	9.0383	1.59122e-19	1.05676e-18	TUBB4A	2.54541	0.235581	10.8048	3.26596e-27	6.31268e-26
IL11	1.60334	0.125285	12.7975	1.69288e-37	2.43374e-36	KCNA7	1.37193	0.180995	7.57995	3.4569e-14	2.6321e-13
NUBP2	1.0441	0.077149	13.5336	9.90967e-42	1.65168e-40	CKM	1.33575	0.154395	8.65151	5.08241e-18	5.24038e-17
KCNK16	2.31646	0.499733	4.63539	3.56263e-06	1.01002e-05	FCER2	2.16322	0.273508	7.90919	2.59072e-15	2.15661e-14
CRISP3	3.68816	0.308774	11.9445	6.93445e-33	8.35746e-32	RSPH6A	1.25952	0.239945	5.24922	1.52742e-07	6.13328e-07
MLN	1.37313	0.304356	4.51161	6.43371e-06	1.78207e-05	IL4I1	1.15798	0.135697	8.5336	1.41864e-17	1.40709e-16
ACOT7	1.36371	0.0855353	15.9432	3.17698e-57	8.93563e-56	TLE6	-1.40911	0.128957	-10.927	8.56592e-28	1.72278e-26
CDC7	1.75302	0.0993305	17.6484	1.04684e-69	4.2298e-68	KIR3DX1	1.30361	0.210129	6.20386	5.50955e-10	2.85371e-09
PCSK5	-1.66896	0.10214	-16.34	5.12339e-60	1.55901e-58	IL27RA	1.40324	0.124138	11.3039	1.25497e-29	2.82417e-28
SCD	-1.55487	0.14969	-10.3873	2.83268e-25	2.45016e-24	TNNT1	-1.38695	0.225381	-6.1538	7.56465e-10	3.86709e-09
ABLIM1	-1.4213	0.0804252	-17.6724	6.8477e-70	2.7875e-68	OLFM2	1.38693	0.131812	10.522	6.84099e-26	1.21773e-24
ERMP1	1.14961	0.0822531	13.9764	2.17107e-44	4.02172e-43	EPHX3	2.58963	0.192184	13.4747	2.2025e-41	9.93599e-40
NRP1	-1.18082	0.0800352	-14.7538	2.90881e-49	6.36125e-48	CASP14	1.34268	0.378675	3.54574	0.00039151	0.00101298
PALMD	-2.87179	0.104616	-27.4508	6.7971e-166	2.9769e-163	SLC1A6	2.31983	0.332693	6.97287	3.10532e-12	1.99123e-11
KCNK6	1.47656	0.10475	14.096	4.02037e-45	7.66449e-44	CCNE1	2.33449	0.156782	14.89	3.82521e-50	2.86191e-48
FBXL19	1.26077	0.0671954	18.7628	1.52257e-78	8.1534e-77	PDCD5	1.03206	0.0706487	14.6083	2.48743e-48	1.68947e-46
MAGEB2	2.59758	0.477118	5.44431	5.20077e-08	1.72814e-07	CLC	1.07326	0.371936	2.8856	0.0039067	0.00857264
EFNA2	3.57259	0.312431	11.4348	2.8021e-30	3.02817e-29	CNTD2	-1.52354	0.181459	-8.39605	4.61764e-17	4.42048e-16
CBARP	1.32447	0.112876	11.7338	8.55669e-32	9.84109e-31	FSD1	2.52074	0.212472	11.8639	1.82348e-32	4.86972e-31
IGFALS	2.86986	0.196487	14.6059	2.5761e-48	5.46552e-47	OVOL3	1.48371	0.155536	9.53935	1.4373e-21	1.88963e-20
MISP	3.22811	0.156611	20.6123	2.1267e-94	1.79242e-92	CD79A	1.5983	0.21098	7.57563	3.57387e-14	2.71649e-13
HCN2	3.66462	0.176	20.8217	2.75147e-96	2.4406e-94	NKG7	1.31118	0.156752	8.3647	6.02691e-17	5.71892e-16
RASSF7	1.6964	0.103625	16.3706	3.10342e-60	9.50244e-59	ICAM5	2.01052	0.203363	9.88634	4.77135e-23	6.93887e-22
PALM	-1.36081	0.112286	-12.1191	8.36599e-34	1.04366e-32	CEACAM5	-4.10356	0.271183	-15.1321	9.95333e-52	8.01391e-50
SERPIND1	-1.29919	0.220951	-5.88	4.10254e-09	1.48856e-08	ATP1A3	-1.1152	0.20755	-5.37317	7.73629e-08	3.20545e-07
MMP11	6.2373	0.141946	43.9414	0	0	MEIS3	-1.38191	0.103021	-13.4139	5.01155e-41	2.22166e-39
P2RX6	-2.57024	0.158618	-16.204	4.72565e-59	1.40062e-57	GRIN2D	1.01825	0.141712	7.18535	6.70344e-13	4.55746e-12
DERL3	1.04391	0.133274	7.83283	4.77008e-15	2.52435e-14	CCDC114	-1.0019	0.140106	-7.15103	8.61277e-13	5.798e-12
GSTT2	-1.43071	0.22004	-6.50203	7.92417e-11	3.24509e-10	SIGLEC6	-1.22453	0.172367	-7.1042	1.21017e-12	8.05417e-12
OSM	1.39961	0.136816	10.2298	1.45751e-24	1.22086e-23	FAM83E	-1.82409	0.200127	-9.11468	7.89e-20	9.1992e-19
SUSD2	1.0843	0.151392	7.16215	7.9423e-13	3.69206e-12	FGF21	4.46695	0.483944	9.23031	2.6986e-20	3.25485e-19
GRK3	-1.73467	0.0782359	-22.1723	6.3581e-109	7.6067e-107	MAST1	1.52738	0.169188	9.02769	1.75333e-19	2.00344e-18
PLA2G3	1.96262	0.276639	7.09451	1.2981e-12	5.95978e-12	KCNN1	1.00202	0.15094	6.63854	3.16795e-11	1.84349e-10
SEZ6L	2.40498	0.246131	9.77112	1.49781e-22	1.1469e-21	UPK1A	-1.49054	0.265574	-5.6125	1.99426e-08	8.79903e-08
GCAT	1.08359	0.0958277	11.3077	1.20255e-29	1.26366e-28	ATP4A	1.01964	0.250142	4.07626	4.57653e-05	0.000135551
GGTLC2	1.00628	0.323063	3.11482	0.00184055	0.00386137	MAG	-3.53868	0.212696	-16.6373	3.74018e-62	5.19682e-60
EIF3L	-1.05696	0.0628979	-16.8044	2.26632e-63	7.59862e-62	HPN	-1.24601	0.151958	-8.1997	2.40988e-16	2.17794e-15
TTC28	-1.43752	0.0724803	-19.8333	1.53755e-87	1.07897e-85	SCN1B	-1.0443	0.10514	-9.93245	3.00784e-23	4.44467e-22
CENPM	2.79368	0.110077	25.3794	4.2553e-142	1.0542e-139	CFAP69	-1.66775	0.116872	-14.2699	3.36888e-46	2.00529e-44
2020-09-03	1.35478	0.15896	8.52278	1.55774e-17	9.34797e-17	CDK6	1.69003	0.123299	13.7068	9.24402e-43	4.49546e-41
SLC5A1	-1.04251	0.223001	-4.67492	2.94067e-06	8.40766e-06	TFPI2	-2.0673	0.244388	-8.45911	2.69419e-17	2.62673e-16
TPTEP1	-1.00594	0.169525	-5.93389	2.95836e-09	1.0874e-08	ITGB8	1.20963	0.157514	7.67951	1.59702e-14	1.24983e-13
SLC5A4	-1.28475	0.114716	-11.1994	4.10604e-29	4.22242e-28	DNAH11	1.15605	0.23242	4.97396	6.56003e-07	2.44854e-06
KDELR3	1.083	0.0999156	10.8391	2.24622e-27	2.13406e-26	DLX5	2.08402	0.198488	10.4995	8.68342e-26	1.53781e-24
MIOX	2.25984	0.186473	12.1189	8.39175e-34	1.04661e-32	STEAP1B	2.72546	0.13709	19.8808	5.97091e-88	2.71231e-85
RHBDD3	1.03311	0.0749458	13.7848	3.1463e-43	5.56553e-42	MPP6	1.62705	0.122492	13.2829	2.91046e-40	1.23507e-38
RASL10A	-1.87055	0.12159	-15.3841	2.09402e-53	5.20345e-52	MET	1.43704	0.140127	10.2552	1.12131e-24	1.83728e-23
NEFH	1.74352	0.186931	9.32705	1.08856e-20	7.64e-20	HOXA1	1.16217	0.103806	11.1956	4.28659e-29	9.3313e-28
BIK	1.61227	0.11593	13.9072	5.72461e-44	1.04078e-42	LFNG	-1.70285	0.123037	-13.8401	1.46089e-43	7.48626e-42
APOBEC3H	1.0572	0.129116	8.18802	2.6555e-16	1.50309e-15	ANKRD7	1.46644	0.189828	7.7251	1.11763e-14	8.84053e-14
RASD2	1.06926	0.15137	7.06389	1.61901e-12	7.39784e-12	VIPR2	-1.87076	0.222667	-8.40161	4.404e-17	4.22511e-16
TTLL12	1.34675	0.092193	14.6079	2.50118e-48	5.30886e-47	CPED1	-1.06432	0.132664	-8.02269	1.03454e-15	8.9014e-15
CBX7	-1.52554	0.0832375	-18.3276	4.98513e-75	2.41393e-73	EVX1	-1.07701	0.273556	-3.93706	8.24857e-05	0.000235824
CABP7	1.84153	0.162259	11.3493	7.47507e-30	7.92966e-29	CHN2	-1.84855	0.131934	-14.0112	1.33111e-44	7.27342e-43
PNPLA5	1.7434	0.438091	3.97953	6.90512e-05	0.000171969	EPHB6	1.95501	0.156044	12.5285	5.21166e-36	1.69644e-34
CACNA1I	1.46569	0.170884	8.57715	9.72556e-18	5.90199e-17	GHRHR	2.48303	0.273473	9.07963	1.08947e-19	1.26028e-18
PVALB	5.0781	0.300926	16.8749	6.88402e-64	2.34171e-62	CCL24	1.73115	0.265075	6.53079	6.54257e-11	3.70657e-10
MLC1	1.49965	0.212703	7.05046	1.78331e-12	8.12662e-12	NPTX2	1.14333	0.161254	7.09022	1.33902e-12	8.87772e-12
KCNK10	1.08318	0.192555	5.62532	1.85168e-08	6.39907e-08	PTPRZ1	1.95549	0.276449	7.07363	1.50935e-12	9.95137e-12
CTSG	-1.77113	0.185811	-9.53188	1.54467e-21	1.13071e-20	TFR2	1.11262	0.163572	6.802	1.03176e-11	6.28768e-11
GZMB	1.52648	0.187316	8.14923	3.6626e-16	2.05747e-15	PPP1R17	2.32548	0.368291	6.31426	2.71463e-10	1.44896e-09
COCH	1.04157	0.211359	4.92798	8.30821e-07	2.49897e-06	PLOD3	1.02501	0.0713992	14.356	9.76509e-47	6.02648e-45
POLE2	1.54204	0.0764919	20.1596	2.21815e-90	1.69214e-88	EZH2	1.10461	0.0857587	12.8804	5.80184e-38	2.12943e-36
PYGL	-1.2358	0.119235	-10.3645	3.59706e-25	3.09658e-24	TSPAN13	-1.38758	0.0971834	-14.2779	3.00429e-46	1.79707e-44
CDKN3	2.90947	0.104229	27.9141	1.7985e-171	8.8221e-169	AGR2	-3.67845	0.190534	-19.306	4.77939e-83	1.72168e-80
CCDC198	1.54509	0.359471	4.29824	1.7216e-05	4.57887e-05	GLI3	-1.62263	0.104674	-15.5017	3.37888e-54	3.118e-52
PLEK2	1.37349	0.0893512	15.3718	2.52995e-53	6.26764e-52	MYL7	-1.22608	0.285374	-4.29638	1.73612e-05	5.45092e-05
LRRC74A	-1.25113	0.170998	-7.31661	2.54304e-13	1.21509e-12	GALNTL5	1.46164	0.450667	3.24328	0.00118162	0.00283072
SAMD15	1.16849	0.118066	9.89698	4.29017e-23	3.37462e-22	SPATA6L	-1.31437	0.136183	-9.65148	4.84495e-22	6.60541e-21
CHGA	2.78363	0.33263	8.36856	5.83282e-17	3.40204e-16	SLC1A1	-2.17927	0.215222	-10.1257	4.24991e-24	6.69509e-23
SIX4	1.61794	0.101523	15.9367	3.52525e-57	9.89248e-56	LHX2	1.64736	0.219605	7.50147	6.31039e-14	4.69739e-13
SLC8A3	-1.0272	0.146716	-7.00127	2.53644e-12	1.1447e-11	CNTNAP3	1.5849	0.184463	8.59199	8.54763e-18	8.63123e-17
TCL1A	3.03544	0.256144	11.8505	2.13863e-32	2.51448e-31	MEGF9	-1.36675	0.09485	-14.4096	4.50619e-47	2.8095e-45
TELO2	1.02602	0.0790231	12.9839	1.51078e-38	2.25522e-37	OGN	-1.9483	0.198386	-9.82074	9.16669e-23	1.30921e-21
PCNX1	-1.06602	0.0613951	-17.3633	1.56419e-67	5.93861e-66	ASPN	-1.5788	0.159714	-9.8852	4.82629e-23	7.01457e-22
DHRS2	2.5736	0.291078	8.84164	9.43245e-19	5.9956e-18	AMBP	-2.80412	0.194159	-14.4424	2.79907e-47	1.78403e-45
EMC9	1.18839	0.0812668	14.6234	1.993e-48	4.23756e-47	RLN2	-1.91997	0.192382	-9.97998	1.86503e-23	2.808e-22
PSME2	1.26373	0.0786236	16.0731	3.93607e-58	1.13639e-56	RLN1	-1.17614	0.151557	-7.76035	8.46933e-15	6.76864e-14
REC8	1.03843	0.139562	7.4406	1.00227e-13	4.91042e-13	ELAVL2	1.49422	0.182856	8.17159	3.04346e-16	2.73378e-15
PLTP	-1.33291	0.105273	-12.6614	9.67032e-37	1.35606e-35	NCS1	1.20432	0.0914142	13.1743	1.23376e-39	5.06749e-38
MMP9	2.56229	0.170687	15.0116	6.16209e-51	1.42492e-49	CA9	2.98709	0.288566	10.3515	4.11971e-25	6.98555e-24
ABHD12	1.09603	0.0683368	16.0386	6.87072e-58	1.97089e-56	LHX3	1.54359	0.437976	3.52437	0.000424498	0.00109261
PROCR	-1.01921	0.0815272	-12.5015	7.32598e-36	9.95165e-35	APBA1	1.59247	0.115116	13.8336	1.59844e-43	8.13966e-42
GINS1	2.49171	0.0967925	25.7428	3.8854e-146	1.0472e-143	SH3GL2	1.01836	0.245371	4.15027	3.3209e-05	0.000100272
SGK2	-3.13398	0.145087	-21.6007	1.7686e-103	1.8777e-101	GATA3	-3.10536	0.117688	-26.3865	1.9589e-153	1.1908e-149
MYBL2	3.83486	0.149193	25.704	1.0546e-145	2.8113e-143	ATRNL1	-2.70392	0.246207	-10.9823	4.65083e-28	9.52715e-27
R3HDML	2.82329	0.331877	8.50706	1.78399e-17	1.06744e-16	RASSF4	1.41658	0.0992742	14.2694	3.39692e-46	2.01951e-44
HNF4A	1.09215	0.2642	4.13379	3.56825e-05	9.17396e-05	DNMBP	-1.11263	0.0994999	-11.1822	4.9824e-29	1.08025e-27
RAB5IF	1.01039	0.0672132	15.0327	4.48572e-51	1.04331e-49	SPOCK2	1.20525	0.1355	8.89483	5.85073e-19	6.45479e-18
RIMS4	3.32267	0.233691	14.2182	7.06167e-46	1.38169e-44	TLX1	3.22482	0.328118	9.82823	8.51023e-23	1.21724e-21
SALL4	2.78856	0.126458	22.0513	9.2832e-108	1.0816e-105	FGF8	1.21616	0.224054	5.42799	5.6993e-08	2.39615e-07
HRH3	2.04534	0.300716	6.80159	1.03474e-11	4.50046e-11	NPM3	1.15816	0.104223	11.1123	1.09279e-28	2.32371e-27
NTSR1	2.66648	0.234037	11.3934	4.50917e-30	4.83567e-29	NEURL1	-1.6466	0.208843	-7.88436	3.16149e-15	2.61696e-14
MRGBP	1.04244	0.0643793	16.1922	5.72243e-59	1.68993e-57	DKK1	1.62241	0.263524	6.1566	7.43214e-10	3.80335e-09
SLC17A9	1.95746	0.146082	13.3997	6.07088e-41	9.83451e-40	SORCS1	-2.34623	0.271736	-8.63426	5.91095e-18	6.04915e-17
NKAIN4	1.90331	0.191771	9.92488	3.24484e-23	2.57134e-22	UBE2S	1.00161	0.108176	9.25907	2.06226e-20	2.50787e-19
ARFGAP1	1.09192	0.0684096	15.9615	2.36901e-57	6.68996e-56	DNAJC12	-3.60907	0.165057	-21.8656	5.5203e-106	6.2432e-103
AVP	-2.00773	0.344384	-5.82993	5.54516e-09	1.99093e-08	LGI1	-2.58005	0.349315	-7.38602	1.51289e-13	1.08949e-12
COL20A1	1.60356	0.247582	6.4769	9.36232e-11	3.81366e-10	CYP2C18	1.40892	0.343549	4.10107	4.1124e-05	0.000122521
CHRNA4	2.30199	0.353882	6.50496	7.77151e-11	3.18469e-10	KRT23	2.33421	0.201943	11.5588	6.66638e-31	1.6113e-29
EEF1A2	3.39342	0.211677	16.0311	7.74507e-58	2.21652e-56	FBXL20	-1.03482	0.108427	-9.54395	1.37498e-21	1.81211e-20
PTK6	2.00062	0.118431	16.8927	5.09443e-64	1.73933e-62	RUNDC3A	-1.17137	0.191412	-6.11961	9.38034e-10	4.75282e-09
SPEF1	2.43789	0.156119	15.6156	5.70136e-55	1.49713e-53	RGS9	1.00648	0.171829	5.85746	4.7e-09	2.21414e-08
CDC25B	1.15005	0.100436	11.4506	2.33581e-30	2.53207e-29	RNF43	-1.21822	0.128758	-9.46129	3.04162e-21	3.90901e-20
ISM1	-2.19858	0.122862	-17.8947	1.29714e-71	5.60595e-70	KRT37	-3.98228	0.241705	-16.4758	5.47474e-61	7.17633e-59
SEL1L2	-3.60961	0.216153	-16.6994	1.32479e-62	4.33513e-61	HOXB6	-1.44771	0.200553	-7.21861	5.25223e-13	3.59546e-12
TRIB3	1.66617	0.0876054	19.0191	1.18585e-80	6.77162e-79	SLC6A4	-4.38402	0.268002	-16.3581	3.80514e-60	4.78159e-58
SLC52A3	1.37089	0.104778	13.0837	4.07847e-39	6.21295e-38	ASIC2	-3.48161	0.272378	-12.7823	2.059e-37	7.33025e-36
RPS10P5	1.13148	0.10234	11.0561	2.04841e-28	2.04849e-27	CCL7	1.48965	0.279144	5.33648	9.47663e-08	3.88582e-07
ANGPT4	-3.3838	0.139551	-24.2477	6.9931e-130	1.4001e-127	CCL1	1.20642	0.275376	4.38098	1.18148e-05	3.79223e-05
RSPO4	1.20064	0.218654	5.49107	3.99517e-08	1.3424e-07	KRT32	-1.2327	0.215834	-5.71135	1.12086e-08	5.06681e-08
PROKR2	1.74645	0.471124	3.70698	0.000209744	0.000494823	MPP2	-1.70657	0.145413	-11.736	8.33045e-32	2.12215e-30
HM13	1.01801	0.0563777	18.0569	6.96088e-73	3.12965e-71	CACNG1	-3.32327	0.211296	-15.728	9.71685e-56	9.74309e-54
MYLK2	2.46854	0.144437	17.0907	1.74021e-65	6.25355e-64	SLC16A6	-3.85384	0.163774	-23.5314	1.9482e-122	4.737e-119
HAO1	2.35725	0.503452	4.68217	2.83857e-06	8.13209e-06	FAM20A	1.19666	0.107925	11.0879	1.43603e-28	3.02974e-27
CCM2L	-1.65637	0.0875304	-18.9234	7.31792e-80	4.07444e-78	MYH1	-1.08966	0.165849	-6.57016	5.026e-11	2.87721e-10
MYL9	-1.37595	0.0986123	-13.9531	3.01014e-44	5.54046e-43	SLC9A3R1	-1.38533	0.109124	-12.695	6.30533e-37	2.18245e-35
PAK5	-3.1915	0.225091	-14.1787	1.24149e-45	2.40322e-44	VTN	-1.61912	0.186888	-8.6636	4.57086e-18	4.72646e-17
MROH8	-1.01333	0.08112	-12.4918	8.27868e-36	1.12024e-34	FOXN1	-1.69702	0.174771	-9.70999	2.73356e-22	3.79816e-21
E2F1	2.64736	0.110694	23.916	2.088e-126	3.9241e-124	PHOX2B	3.76479	0.54201	6.94598	3.75829e-12	2.3904e-11
CST9L	2.82366	0.377767	7.4746	7.7438e-14	3.81719e-13	GNRHR	-1.04396	0.149051	-7.00403	2.48694e-12	1.60978e-11
SLC32A1	1.53358	0.375698	4.08195	4.46595e-05	0.000113705	CWH43	1.71911	0.304833	5.63953	1.70518e-08	7.57303e-08
CST4	7.65637	0.325405	23.5287	2.0721e-122	3.469e-120	SULT1E1	1.95184	0.359091	5.43552	5.46378e-08	2.3037e-07
WFDC2	1.02127	0.203439	5.02003	5.16627e-07	1.58355e-06	ODAM	5.46581	0.303539	18.007	1.71804e-72	3.92253e-70
PPP1R16B	-1.74203	0.128398	-13.5674	6.2479e-42	1.04777e-40	SMR3A	4.761	0.769346	6.18837	6.0789e-10	3.13359e-09
FAM83D	3.51452	0.131138	26.8002	3.2128e-158	1.1257e-155	NMU	2.23919	0.216851	10.326	5.37778e-25	9.02751e-24
SYNDIG1	2.84001	0.148299	19.1505	9.58437e-82	5.61017e-80	PF4V1	1.33626	0.330521	4.04289	5.27961e-05	0.0001551
CELF4	1.18277	0.181806	6.50566	7.73524e-11	3.17036e-10	AREG	-2.12527	0.226623	-9.37799	6.7243e-21	8.46736e-20
CDH20	-3.29907	0.161808	-20.3888	2.1043e-92	1.67293e-90	UCP1	-3.08287	0.297308	-10.3693	3.42037e-25	5.83021e-24
MYOM1	-4.75831	0.125231	-37.9964	0	0	TBC1D9	-3.35742	0.11935	-28.1309	4.104e-174	9.9791e-170
ST8SIA5	1.01031	0.150605	6.70832	1.96872e-11	8.41011e-11	INPP4B	-2.22467	0.11915	-18.6711	8.50393e-78	2.52167e-75
LAMA1	-1.16771	0.140843	-8.29082	1.12467e-16	6.4659e-16	CPE	-1.06627	0.11805	-9.03234	1.68035e-19	1.92185e-18
RNF125	-1.35243	0.0838738	-16.1245	1.71545e-58	5.00276e-57	WFS1	-1.35589	0.0738479	-18.3606	2.7139e-75	6.98305e-73
MXRA5	1.13539	0.107291	10.5824	3.59744e-26	3.24557e-25	ANXA10	-1.19138	0.236838	-5.03038	4.89506e-07	1.85543e-06
VSIG1	1.63111	0.157448	10.3597	3.78015e-25	3.25077e-24	AADAT	2.0507	0.145349	14.1088	3.35308e-45	1.87429e-43
STS	-1.15134	0.100962	-11.4036	4.00989e-30	4.30683e-29	GALNT7	-1.41226	0.110256	-12.8089	1.46141e-37	5.23343e-36
GPR143	1.70954	0.130639	13.086	3.96002e-39	6.03627e-38	SOD3	1.31817	0.158001	8.34275	7.25798e-17	6.83904e-16
MID1	-1.37748	0.139094	-9.90327	4.02888e-23	3.17469e-22	TRIM2	1.71813	0.125612	13.6781	1.37274e-42	6.62938e-41
RHOXF1	-2.5403	0.148547	-17.1009	1.46039e-65	5.26341e-64	GLRB	-1.19467	0.153511	-7.78229	7.12206e-15	5.72768e-14
GUCY2F	1.03536	0.35727	2.89799	0.00375567	0.00756781	NCAPG	1.01223	0.112911	8.96482	3.10778e-19	3.48156e-18
AMMECR1	1.01953	0.081838	12.4579	1.26613e-35	1.70108e-34	UGDH	-1.4889	0.111387	-13.3669	9.44112e-41	4.11408e-39
CHRDL1	-4.41018	0.184172	-23.946	1.0179e-126	1.9428e-124	PPARGC1A	2.45094	0.191712	12.7845	2.00174e-37	7.13686e-36
SRPX	-2.54725	0.110497	-23.0526	1.3844e-117	2.0454e-115	CRYAB	2.99393	0.174545	17.1528	5.99045e-66	9.9089e-64
SYP	1.43606	0.175956	8.16149	3.30923e-16	1.86323e-15	CTSC	1.04525	0.101302	10.3182	5.82972e-25	9.7693e-24
BMX	-2.66401	0.134751	-19.7699	5.40638e-87	3.74039e-85	B3GAT1	2.01859	0.230007	8.77621	1.69078e-18	1.79686e-17
LUZP4	1.57953	0.396275	3.98595	6.72114e-05	0.000167651	CCND1	-1.91141	0.140723	-13.5827	5.07082e-42	2.378e-40
ZC3H12B	-1.33587	0.0915449	-14.5925	3.13608e-48	6.63351e-47	CCKBR	4.81542	0.374182	12.8692	6.70797e-38	2.44906e-36
SLC35A2	1.3253	0.0558544	23.7278	1.8635e-124	3.3e-122	HPX	-3.72432	0.18745	-19.8683	7.65412e-88	3.38389e-85
PCSK1N	2.89359	0.255913	11.3069	1.21241e-29	1.27375e-28	TRIM3	-1.46683	0.0880969	-16.6502	3.01398e-62	4.21187e-60
SMS	1.12832	0.0654248	17.246	1.19884e-66	4.42145e-65	FOLR1	2.37583	0.262188	9.06158	1.28579e-19	1.48314e-18
CD99L2	-1.02787	0.0683761	-15.0326	4.49171e-51	1.0442e-49	FOLR3	1.67261	0.221806	7.54087	4.66848e-14	3.51716e-13
GPR50	-2.42361	0.417966	-5.79858	6.68802e-09	2.38665e-08	APOC3	-1.75446	0.497475	-3.52672	0.000420742	0.0010834
TIMP1	1.0796	0.0914311	11.8078	3.55913e-32	4.15574e-31	CEP126	-1.76662	0.13855	-12.7508	3.08664e-37	1.08694e-35
KLHL4	-2.06722	0.117972	-17.523	9.56357e-69	3.7529e-67	UPK2	2.1426	0.175095	12.2368	1.97718e-34	5.9207e-33
GABRE	-2.37582	0.193608	-12.2713	1.29239e-34	1.66871e-33	KIAA1549L	1.39114	0.126349	11.0103	3.40754e-28	7.03791e-27
ITIH6	1.37064	0.171356	7.99877	1.2567e-15	6.85462e-15	SLC1A2	-2.05585	0.179994	-11.4218	3.25586e-30	7.55157e-29
MAGED2	1.25129	0.101798	12.2918	1.00189e-34	1.29738e-33	SCGB2A2	-3.75586	0.322209	-11.6566	2.12359e-31	5.24758e-30
KLF8	-1.08935	0.0997445	-10.9214	9.10858e-28	8.8073e-27	SLC35F2	1.31426	0.105707	12.4331	1.7289e-35	5.45254e-34
ZDHHC15	-1.15343	0.115634	-9.97485	1.96406e-23	1.5724e-22	CALCA	1.21106	0.33161	3.65206	0.000260148	0.000692498
CENPI	2.21946	0.103325	21.4804	2.3771e-102	2.4548e-100	SOX6	2.41295	0.166082	14.5287	7.97669e-48	5.28494e-46
DRP2	2.14596	0.119144	18.0115	1.58357e-72	7.02963e-71	POU2AF1	1.50378	0.192969	7.79288	6.54994e-15	5.28155e-14
HTR2A	-2.72224	0.170374	-15.978	1.81883e-57	5.14814e-56	MYF6	-1.31971	0.41554	-3.17589	0.00149377	0.00351852
TNFSF13B	1.05041	0.115216	9.11685	7.73371e-20	5.21879e-19	LIN7A	-2.28296	0.19445	-11.7406	7.89321e-32	2.01498e-30
CAB39L	-1.15551	0.0876673	-13.1806	1.13515e-39	1.76152e-38	KRT18	-1.28493	0.103376	-12.4296	1.80543e-35	5.68283e-34
SGCG	-2.66668	0.249455	-10.69	1.13337e-26	1.04422e-25	WNT5B	1.29938	0.132662	9.79466	1.18693e-22	1.68362e-21
RGCC	-1.53738	0.0875253	-17.565	4.56977e-69	1.80917e-67	TRPV4	1.18512	0.111381	10.6402	1.93613e-26	3.56887e-25
ACOD1	3.41696	0.330399	10.3419	4.55397e-25	3.89913e-24	FOXM1	1.52434	0.121976	12.4971	7.7473e-36	2.49344e-34
MEDAG	-2.37694	0.132083	-17.9958	2.10299e-72	9.29334e-71	PRR4	1.95928	0.147895	13.2478	4.64558e-40	1.94758e-38
MSLN	4.28854	0.286595	14.9638	1.26673e-50	2.90083e-49	PRMT8	-2.28672	0.248453	-9.20385	3.45363e-20	4.1378e-19
CORO1A	1.10205	0.118052	9.3353	1.00701e-20	7.08086e-20	RAD51AP1	1.25924	0.102997	12.226	2.25692e-34	6.73766e-33
NFAT5	-1.07086	0.0960367	-11.1505	7.1194e-29	7.25277e-28	AKAP3	1.11461	0.125312	8.89469	5.85835e-19	6.46172e-18
CBLN1	-1.06389	0.205076	-5.18779	2.12807e-07	6.7207e-07	GSG1	-2.12736	0.197026	-10.7974	3.54218e-27	6.83029e-26
ZNF423	-1.20724	0.111555	-10.8219	2.71005e-27	2.56678e-26	SCNN1A	-1.3623	0.129341	-10.5326	6.1127e-26	1.09249e-24
CCL17	1.87487	0.173876	10.7828	4.14899e-27	3.89505e-26	CDK2AP1	1.33387	0.0782998	17.0355	4.48064e-65	7.09765e-63
NME3	1.48869	0.106278	14.0075	1.4025e-44	2.6148e-43	RASAL1	2.16809	0.192081	11.2874	1.51463e-29	3.38813e-28
HAS3	-2.93683	0.155789	-18.8513	2.86698e-79	1.56954e-77	IFNG	1.62032	0.216247	7.49291	6.73641e-14	5.00532e-13
ESRP2	1.00464	0.0802269	12.5225	5.62531e-36	7.66267e-35	NOP2	1.04631	0.0712665	14.6817	8.44594e-49	5.85092e-47
HAGHL	3.4241	0.129588	26.4229	7.471e-154	2.3797e-151	CDCA3	1.42111	0.112232	12.6623	9.57084e-37	3.28237e-35
FAM173A	1.75742	0.109566	16.0399	6.72413e-58	1.92997e-56	SLCO1B3	2.17376	0.472383	4.60168	4.19096e-06	1.42226e-05
SLC7A5	2.60549	0.152479	17.0874	1.84054e-65	6.60441e-64	NANOG	1.64513	0.18548	8.86957	7.34277e-19	8.04611e-18
METRN	2.35773	0.133647	17.6415	1.18224e-69	4.75729e-68	LDHB	1.95924	0.123409	15.876	9.28979e-57	9.77861e-55
RHBDL1	2.60659	0.144896	17.9893	2.36111e-72	1.03872e-70	ST8SIA1	1.99375	0.133018	14.9886	8.72026e-51	6.72068e-49
CRYM	1.24469	0.223318	5.57361	2.49515e-08	8.53443e-08	AICDA	1.5502	0.254378	6.09407	1.10073e-09	5.53906e-09
PRSS33	3.22425	0.411317	7.83885	4.547e-15	2.40889e-14	RFX4	1.79533	0.268545	6.68539	2.30311e-11	1.35596e-10
ELOB	1.11149	0.082074	13.5426	8.76843e-42	1.46645e-40	RSPH4A	-1.10594	0.143916	-7.68463	1.53442e-14	1.20336e-13
TOX3	1.49534	0.172159	8.68578	3.76138e-18	2.32577e-17	PAK1IP1	1.06181	0.065872	16.1193	1.86598e-58	2.1402e-56
QPRT	1.48202	0.138936	10.6669	1.45339e-26	1.33181e-25	GCNT2	1.76753	0.131125	13.4797	2.05863e-41	9.32154e-40
PYCARD	1.87859	0.120958	15.5309	2.14229e-54	5.51042e-53	NCOA7	1.42972	0.108659	13.1579	1.53362e-39	6.26737e-38
MAZ	1.27238	0.0568625	22.3764	6.6879e-111	8.4988e-109	ULBP1	1.58997	0.184834	8.60217	7.82226e-18	7.92344e-17
IL21R	2.676	0.135981	19.6792	3.2493e-86	2.20144e-84	FANCE	1.19024	0.0786525	15.1329	9.82564e-52	7.92422e-50
SYT17	1.40147	0.142234	9.85331	6.6325e-23	5.16163e-22	TULP1	1.43554	0.131272	10.9356	7.7867e-28	1.57127e-26
TMC5	1.19503	0.185314	6.4487	1.12815e-10	4.56811e-10	RHAG	-1.47489	0.32973	-4.47303	7.71186e-06	2.53385e-05
SLC6A2	-1.17242	0.284085	-4.127	3.67519e-05	9.43702e-05	SOD2	1.04948	0.0904014	11.6091	3.70709e-31	9.06382e-30
KNOP1	1.06993	0.0531869	20.1164	5.3013e-90	3.97614e-88	IL17A	1.43033	0.548416	2.60811	0.00910445	0.018696
CORO2B	-2.35098	0.103703	-22.6704	8.7859e-114	1.1807e-111	IL17F	1.51085	0.530578	2.84756	0.00440556	0.00957271
RASL12	-1.12323	0.10083	-11.1398	8.0316e-29	8.16003e-28	RBM24	-3.82243	0.233188	-16.392	2.18028e-60	2.76117e-58
GOLGA8UP	1.23819	0.226695	5.46192	4.71007e-08	1.57244e-07	TREML2	1.67544	0.175814	9.52962	1.57862e-21	2.06592e-20
CEMIP	3.1741	0.150148	21.1398	3.4265e-99	3.28271e-97	BAG2	1.33527	0.0968756	13.7833	3.21168e-43	1.61852e-41
ZNF106	-1.65063	0.0707464	-23.3317	2.1154e-120	3.3472e-118	GPR63	1.36919	0.137255	9.97551	1.95096e-23	2.93193e-22
ATP8B4	-1.35346	0.102907	-13.1523	1.65114e-39	2.55049e-38	PRDM13	4.07607	0.481543	8.46461	2.57006e-17	2.51124e-16
FAM189A1	1.67303	0.1985	8.42837	3.50525e-17	2.06882e-16	E2F3	1.11604	0.077799	14.3451	1.14297e-46	7.02703e-45
OIP5	2.43629	0.0968586	25.153	1.3092e-139	3.0726e-137	SIM1	2.28389	0.218341	10.4602	1.31623e-25	2.30831e-24
PDGFRL	-1.19574	0.110086	-10.8619	1.75073e-27	1.67246e-26	HDGFL1	1.15909	0.250815	4.62131	3.81331e-06	1.30064e-05
ZDHHC2	-1.09532	0.108541	-10.0913	6.03478e-24	4.92378e-23	COL9A1	4.87854	0.266126	18.3317	4.62308e-75	1.18329e-72
RP1	1.59192	0.227993	6.98234	2.90301e-12	1.30497e-11	VNN1	1.58374	0.131011	12.0886	1.21391e-33	3.48076e-32
TRPA1	4.73847	0.252955	18.7325	2.69153e-78	1.43194e-76	EYA4	-1.60441	0.201475	-7.96333	1.67469e-15	1.4149e-14
SFRP1	-2.52677	0.22045	-11.4619	2.0498e-30	2.22794e-29	NR2E1	2.18085	0.323149	6.74874	1.49136e-11	8.9417e-11
LAPTM4B	1.30319	0.12147	10.7285	7.48052e-27	6.95083e-26	PERP	1.06063	0.103955	10.2028	1.92609e-24	3.11188e-23
POP1	1.08085	0.0845004	12.7911	1.83871e-37	2.64029e-36	ARFGEF3	-1.2088	0.10901	-11.089	1.41919e-28	2.99552e-27
JPH1	1.61328	0.140502	11.4822	1.6205e-30	1.76917e-29	SLC16A10	1.96863	0.147421	13.3538	1.12591e-40	4.8844e-39
DKK4	-1.59409	0.238213	-6.69185	2.2037e-11	9.37357e-11	ADGRG6	1.0949	0.16531	6.62329	3.51288e-11	2.03496e-10
ESRP1	1.62639	0.0827051	19.6649	4.31042e-86	2.91232e-84	UNC93A	3.00805	0.346542	8.68018	3.95157e-18	4.09829e-17
WISP1	3.48489	0.117484	29.6628	2.3218e-193	2.1489e-190	MDFI	1.55596	0.161288	9.6471	5.05672e-22	6.8864e-21
TRPS1	1.25151	0.104424	11.9849	4.26428e-33	5.18522e-32	SMOC2	-1.32351	0.127206	-10.4044	2.36669e-25	4.0727e-24
SPAG1	1.35516	0.0858144	15.7917	3.54837e-56	9.70745e-55	MRPL2	1.18758	0.0790327	15.0264	4.92772e-51	3.85273e-49
NCALD	-1.46219	0.142529	-10.2589	1.07915e-24	9.0968e-24	PTK7	1.00067	0.098544	10.1545	3.16279e-24	5.03139e-23
GSDMD	1.04687	0.0895029	11.6964	1.32905e-31	1.51259e-30	GMDS	1.07111	0.0941095	11.3815	5.1688e-30	1.18736e-28
TSTA3	1.79661	0.084072	21.3699	2.5454e-101	2.5533e-99	TTK	1.50319	0.1145	13.1283	2.26721e-39	9.12721e-38
PYCR3	1.80812	0.0906617	19.9435	1.70537e-88	1.23563e-86	WISP3	1.9336	0.203973	9.4797	2.55009e-21	3.28513e-20
SQLE	2.30201	0.110232	20.8834	7.57975e-97	6.84718e-95	ENPP5	-1.70421	0.149007	-11.4371	2.72907e-30	6.35619e-29
MCM4	1.78382	0.0912083	19.5577	3.5493e-85	2.34006e-83	PRSS16	1.07479	0.164333	6.54034	6.13783e-11	3.48617e-10
ADAM2	1.69566	0.535176	3.16842	0.00153272	0.00325059	NUDT12	-1.55035	0.0872088	-17.7774	1.0573e-70	2.18798e-68
TULP2	-1.18417	0.129985	-9.11003	8.23574e-20	5.54764e-19	NME5	-1.96669	0.161487	-12.1786	4.04129e-34	1.19048e-32
DHDH	1.49175	0.145447	10.2564	1.10798e-24	9.33666e-24	KIF20A	1.06973	0.115177	9.28764	1.57748e-20	1.93235e-19
MAP4K1	1.05691	0.120636	8.76112	1.93315e-18	1.2112e-17	MRPS30	-1.99049	0.139821	-14.236	5.4766e-46	3.20111e-44
TUBB4A	1.95532	0.222549	8.78601	1.5497e-18	9.76694e-18	PCDHB6	1.38261	0.165582	8.35	6.82644e-17	6.4474e-16
PPP1R37	1.1751	0.0729401	16.1104	2.15489e-58	6.26195e-57	PDE8B	-1.1191	0.129886	-8.61601	6.93275e-18	7.05327e-17
SLC17A7	-3.0204	0.120937	-24.975	1.1421e-137	2.5937e-135	HAVCR1	-1.04098	0.235008	-4.42955	9.44306e-06	3.06805e-05
RNASEH2A	1.79386	0.0776171	23.1117	3.5314e-118	5.3299e-116	GRM6	1.89103	0.144917	13.049	6.43553e-39	2.51581e-37
AMH	2.69242	0.187157	14.3859	6.34381e-47	1.28745e-45	THBS4	-1.76139	0.17788	-9.9021	4.07616e-23	5.96078e-22
RETN	1.31942	0.214177	6.16039	7.25642e-10	2.78058e-09	GABRG2	-1.9655	0.598622	-3.28338	0.00102572	0.00248156
FCER2	-1.0759	0.262496	-4.09874	4.15404e-05	0.000106105	POLR3G	1.37035	0.0925399	14.8082	1.29669e-49	9.3283e-48
CLEC4M	-1.94419	0.25197	-7.71597	1.20062e-14	6.20382e-14	NPR3	1.84211	0.166348	11.0738	1.68053e-28	3.52836e-27
IL4I1	2.72466	0.137203	19.8586	9.29406e-88	6.58804e-86	SLC27A6	1.54253	0.219736	7.01995	2.21954e-12	1.44342e-11
TLE6	1.59821	0.126939	12.5904	2.38558e-36	3.29163e-35	IRX4	1.12083	0.227855	4.91906	8.69589e-07	3.20347e-06
NOVA2	-1.47315	0.0827642	-17.7994	7.14262e-71	2.99709e-69	AGXT2	-1.55227	0.203439	-7.63013	2.34515e-14	1.81257e-13
ASF1B	3.05471	0.0987401	30.9369	3.8133e-210	5.6682e-207	PRLR	-1.42324	0.109953	-12.9441	2.53801e-38	9.51627e-37
TNNT1	4.55145	0.213179	21.3503	3.8729e-101	3.8691e-99	ERGIC1	-1.05917	0.0705537	-15.0123	6.10268e-51	4.75608e-49
CASP14	6.367	0.349549	18.2149	3.93019e-74	1.83255e-72	STC2	-3.48512	0.186883	-18.6487	1.29367e-77	3.76722e-75
SLC1A6	2.76706	0.322555	8.57855	9.60793e-18	5.83277e-17	CPEB4	-1.05366	0.0881618	-11.9514	6.38562e-33	1.74657e-31
CCNE1	2.82377	0.160944	17.545	6.49022e-69	2.55915e-67	UNC5A	-1.92948	0.195945	-9.84706	7.05803e-23	1.0149e-21
CLC	-1.15705	0.359573	-3.21784	0.00129159	0.00276612	HRG	1.15607	0.280351	4.12365	3.72912e-05	0.000111828
CNTD2	2.99337	0.167738	17.8455	3.13325e-71	1.33067e-69	CLDN16	2.92209	0.190132	15.3687	2.65407e-53	2.3214e-51
PRX	-1.1906	0.0958866	-12.4167	2.12027e-35	2.82158e-34	LRRC31	-2.8373	0.280268	-10.1235	4.34415e-24	6.83371e-23
SHD	1.73697	0.236369	7.34854	2.00383e-13	9.64305e-13	GNAT1	1.07409	0.204895	5.24212	1.58744e-07	6.36428e-07
TBCB	1.01385	0.0680533	14.8979	3.3993e-50	7.68399e-49	USP9Y	-1.26514	0.412065	-3.07025	0.00213878	0.00491082
FSD1	2.6062	0.211953	12.2961	9.50155e-35	1.23266e-33	HHLA2	1.15921	0.213454	5.43074	5.61197e-08	2.36188e-07
ZFR2	1.64424	0.257	6.39783	1.57602e-10	6.32574e-10	IQCG	1.03395	0.0806631	12.8181	1.29892e-37	4.67562e-36
TJP3	1.73065	0.0996126	17.3738	1.3023e-67	4.95582e-66	MORC1	1.11289	0.267887	4.15431	3.26271e-05	9.86563e-05
APLP1	2.42916	0.174108	13.9521	3.05615e-44	5.62305e-43	C3orf52	-1.56139	0.128655	-12.1363	6.78594e-34	1.98083e-32
BBC3	1.35484	0.0969577	13.9735	2.2618e-44	4.18821e-43	ROPN1B	3.98931	0.246556	16.1801	6.96502e-59	8.28156e-57
CD79A	1.12254	0.20332	5.52105	3.3698e-08	1.13926e-07	CSPG5	1.03031	0.138544	7.4367	1.03232e-13	7.54817e-13
CEACAM5	5.20008	0.278335	18.6828	6.83374e-78	3.58512e-76	EFCC1	-2.42462	0.153368	-15.8092	2.69064e-56	2.7781e-54
ATP1A3	3.50366	0.195239	17.9455	5.20223e-72	2.27231e-70	KIAA1257	-1.32213	0.133001	-9.94079	2.76623e-23	4.10386e-22
MEIS3	1.02697	0.104883	9.79162	1.22317e-22	9.40424e-22	CISH	-1.28909	0.0962942	-13.387	7.20488e-41	3.168e-39
CNFN	1.21844	0.127999	9.51907	1.74744e-21	1.27477e-20	PEX5L	-2.60749	0.229944	-11.3397	8.34664e-30	1.89587e-28
GRIN2D	2.15805	0.132675	16.2658	1.72698e-59	5.18432e-58	PLCH1	1.82988	0.191843	9.53843	1.45006e-21	1.90589e-20
SYNGR4	3.03025	0.180348	16.8022	2.34978e-63	7.87305e-62	IL1A	1.3493	0.159541	8.45736	2.7349e-17	2.66322e-16
CLEC11A	1.38963	0.115968	11.9829	4.36903e-33	5.31127e-32	CCL20	2.03319	0.18984	10.71	9.13355e-27	1.71789e-25
CCDC114	1.32379	0.133751	9.89737	4.27386e-23	3.36233e-22	KCNIP3	1.18804	0.126391	9.39968	5.47318e-21	6.92961e-20
LIG1	1.06185	0.063398	16.749	5.7581e-63	1.90713e-61	FAHD2A	1.04516	0.0658904	15.8621	1.15949e-56	1.21524e-54
HAS1	-2.35222	0.204707	-11.4907	1.46972e-30	1.60849e-29	ZAP70	1.05848	0.159794	6.62402	3.49558e-11	2.02542e-10
RAB3D	1.04689	0.0736383	14.2166	7.22593e-46	1.4127e-44	STEAP3	1.22154	0.0977236	12.5	7.46644e-36	2.40464e-34
CAPS	2.18705	0.136037	16.0769	3.70583e-58	1.07181e-56	TFCP2L1	1.8945	0.182758	10.3662	3.53303e-25	6.01172e-24
FAM83E	1.91877	0.190827	10.0551	8.72716e-24	7.07812e-23	POMC	2.40601	0.187123	12.8579	7.76851e-38	2.82989e-36
RASIP1	-1.40339	0.0975837	-14.3814	6.77029e-47	1.3723e-45	CENPA	1.71516	0.117797	14.5603	5.02585e-48	3.36656e-46
FGF21	3.13996	0.549696	5.71218	1.11536e-08	3.91684e-08	SLC30A3	1.86606	0.187213	9.96757	2.11326e-23	3.16216e-22
LILRB5	-2.78656	0.139114	-20.0307	2.97213e-89	2.17921e-87	REEP6	-1.00604	0.160675	-6.26133	3.81712e-10	2.00812e-09
KLF1	1.71417	0.141822	12.0867	1.24115e-33	1.54011e-32	PCSK4	-1.69566	0.127192	-13.3315	1.51793e-40	6.54418e-39
MAST1	1.99347	0.166732	11.9562	6.02684e-33	7.29587e-32	TACR1	1.10672	0.183985	6.01528	1.79579e-09	8.85081e-09
TFPT	1.18713	0.0948077	12.5214	5.70085e-36	7.7591e-35	ACADL	1.86909	0.261044	7.16007	8.06331e-13	5.43564e-12
SLC5A5	2.00361	0.208857	9.59322	8.53776e-22	6.32237e-21	REG1A	2.36753	0.722567	3.27656	0.0010508	0.00253807
PIK3R2	1.28775	0.0882801	14.5871	3.39207e-48	7.17189e-47	GLS	1.12175	0.0756737	14.8235	1.03242e-49	7.47134e-48
RAB3A	1.3684	0.0934473	14.6436	1.48043e-48	3.16419e-47	IGFBP5	-2.09471	0.174507	-12.0036	3.40346e-33	9.46334e-32
ISYNA1	1.02027	0.103427	9.86462	5.92601e-23	4.62355e-22	KCNJ13	-1.6633	0.213699	-7.78337	7.06157e-15	5.67998e-14
COMP	4.56015	0.16275	28.0195	9.4141e-173	5.0193e-170	OTX1	2.1027	0.157678	13.3354	1.44052e-40	6.21598e-39
UPK1A	2.3014	0.247431	9.30118	1.3889e-20	9.69663e-20	GNLY	1.99096	0.162013	12.2889	1.0391e-34	3.16422e-33
COPE	1.05187	0.0710133	14.8123	1.21952e-49	2.70311e-48	PLCD4	-1.45887	0.105566	-13.8195	1.9453e-43	9.87496e-42
GAPDHS	1.16577	0.278154	4.19111	2.77595e-05	7.22481e-05	IL1R2	2.35186	0.154195	15.2525	1.5855e-52	1.33169e-50
MAG	1.44976	0.216917	6.68348	2.33328e-11	9.90497e-11	PRKAG3	2.4591	0.303252	8.1091	5.09963e-16	4.49602e-15
LSR	1.5868	0.0844094	18.7988	7.72203e-79	4.18542e-77	SMYD1	1.12278	0.301412	3.72506	0.000195266	0.000529083
HPN	2.19802	0.145509	15.1057	1.48575e-51	3.51225e-50	WNT6	3.29107	0.221884	14.8324	9.04607e-50	6.6054e-48
SIPA1L3	1.0735	0.0661781	16.2214	3.56063e-59	1.05981e-57	IL1RL2	1.5146	0.148894	10.1723	2.63581e-24	4.21514e-23
RUNDC3B	-1.64472	0.106328	-15.4683	5.67967e-54	1.43682e-52	MLPH	-2.95987	0.128042	-23.1165	3.1602e-118	6.1473e-115
RASA4	-1.2142	0.0942445	-12.8835	5.57363e-38	8.16112e-37	SLC5A7	-2.54734	0.378593	-6.72844	1.71493e-11	1.02217e-10
DNAH11	1.85026	0.212997	8.68677	3.72889e-18	2.30626e-17	TPO	-1.34886	0.131437	-10.2624	1.04123e-24	1.71125e-23
DLX5	2.21517	0.181387	12.2124	2.66915e-34	3.40158e-33	ODC1	1.44324	0.0987317	14.6177	2.16439e-48	1.47832e-46
PTN	-2.36258	0.19416	-12.1682	4.58831e-34	5.78724e-33	PRKD3	1.12078	0.0851915	13.156	1.57244e-39	6.42058e-38
ADAP1	1.30531	0.117645	11.0953	1.32174e-28	1.33239e-27	QPCT	1.34211	0.130275	10.3021	6.89065e-25	1.14721e-23
CAV2	-2.90586	0.100443	-28.9304	4.9462e-184	3.4172e-181	DLX2	-2.68765	0.27542	-9.75836	1.69877e-22	2.38904e-21
CAV1	-3.37669	0.103526	-32.6169	2.3624e-233	7.7253e-230	LCT	2.87416	0.266495	10.785	4.05118e-27	7.784e-26
MET	-1.63641	0.137446	-11.9059	1.10314e-32	1.31721e-31	PLCL1	-1.33008	0.141816	-9.37895	6.66341e-21	8.39721e-20
HOXA2	-2.11111	0.153077	-13.7912	2.88047e-43	5.10819e-42	KYNU	1.01366	0.189567	5.34725	8.93029e-08	3.67263e-07
HOXA3	-1.80437	0.133906	-13.4749	2.19925e-41	3.61641e-40	KISS1R	-2.60117	0.232744	-11.1761	5.33705e-29	1.15508e-27
HOXA5	-2.35299	0.14033	-16.7676	4.21142e-63	1.40053e-61	VAX2	1.25393	0.164773	7.61005	2.73997e-14	2.10502e-13
HOXA6	-2.33447	0.165448	-14.11	3.29668e-45	6.30197e-44	GPX7	1.23049	0.0978591	12.5741	2.93108e-36	9.68353e-35
CPED1	-2.85699	0.128768	-22.1871	4.5772e-109	5.4895e-107	TPSG1	-5.73614	0.249219	-23.0164	3.1908e-117	5.9681e-114
EVX1	1.59826	0.269342	5.93394	2.95749e-09	1.08716e-08	RALGPS2	-1.95332	0.101972	-19.1554	8.72149e-82	2.92717e-79
ABHD11	1.35978	0.0848055	16.0341	7.38113e-58	2.1136e-56	ANGPTL1	-1.13474	0.158469	-7.1606	8.03258e-13	5.41643e-12
STX1A	1.46821	0.093061	15.7769	4.48756e-56	1.22359e-54	C1orf21	-1.14697	0.109708	-10.4547	1.39423e-25	2.43982e-24
CRHR2	-1.62982	0.128466	-12.6868	6.99984e-37	9.84111e-36	PLA2G4A	2.4929	0.135632	18.3799	1.90444e-75	4.97928e-73
CCL24	-2.27952	0.255443	-8.92379	4.5061e-19	2.91639e-18	RGS2	1.37123	0.139818	9.80725	1.04788e-22	1.4931e-21
HSPB1	1.48734	0.124894	11.9088	1.06463e-32	1.27279e-31	RPE65	1.43411	0.259356	5.52953	3.21093e-08	1.3853e-07
NPTX2	1.52829	0.156848	9.74379	1.96093e-22	1.4936e-21	TNNI3K	-1.01785	0.184388	-5.52018	3.38654e-08	1.45693e-07
NUDT1	1.08218	0.0866418	12.4903	8.43573e-36	1.14117e-34	TFAP2E	1.40736	0.119305	11.7963	4.07914e-32	1.06423e-30
PTPRZ1	-1.43511	0.264374	-5.42832	5.68875e-08	1.8834e-07	LGALS8	-1.03613	0.0740586	-13.9907	1.77719e-44	9.63506e-43
TFR2	3.26301	0.154939	21.06	1.8507e-98	1.72259e-96	ZP4	4.48458	0.358217	12.5192	5.86319e-36	1.90342e-34
PPP1R17	-1.58029	0.330482	-4.78178	1.73747e-06	5.08207e-06	KCNQ4	2.78012	0.154951	17.9419	5.54774e-72	1.23193e-69
AP1S1	1.22795	0.063571	19.3163	3.92059e-83	2.40091e-81	RIMS3	1.2087	0.119249	10.1359	3.82883e-24	6.05725e-23
EZH2	2.30996	0.0919947	25.1097	3.8964e-139	9.058e-137	PADI2	2.33644	0.164761	14.1807	1.20572e-45	6.9309e-44
MEST	-1.60718	0.119443	-13.4555	2.85616e-41	4.67937e-40	ACTL8	3.93564	0.339107	11.6059	3.84636e-31	9.38547e-30
MEOX2	-2.7872	0.141539	-19.6921	2.51961e-86	1.70943e-84	IGSF21	-1.97622	0.186979	-10.5692	4.1416e-26	7.5013e-25
TSPAN13	1.59521	0.100535	15.8672	1.06925e-56	2.96657e-55	PLA2G2D	1.07412	0.237878	4.5154	6.31974e-06	2.09814e-05
RARRES2	-1.46888	0.121112	-12.1283	7.47601e-34	9.33588e-33	GBP1	1.53945	0.126307	12.1882	3.59398e-34	1.0612e-32
AGR2	2.38504	0.200879	11.873	1.63406e-32	1.93515e-31	CR2	2.33625	0.280929	8.31614	9.08777e-17	8.49572e-16
AEBP1	1.16576	0.109376	10.6583	1.59522e-26	1.45877e-25	CDC20	1.73176	0.122781	14.1044	3.56631e-45	1.98436e-43
MYL7	-1.20149	0.28305	-4.24481	2.1878e-05	5.76038e-05	TSPAN1	-2.78538	0.180281	-15.4502	7.51575e-54	6.8063e-52
GCK	-1.02561	0.147896	-6.93465	4.07222e-12	1.81361e-11	SLC19A2	-1.28029	0.100632	-12.7225	4.43687e-37	1.54784e-35
LIMK1	1.01851	0.0616982	16.5079	3.2165e-61	1.0088e-59	FAAH	-1.06519	0.0903668	-11.7874	4.53394e-32	1.17909e-30
SLC1A1	2.25331	0.203207	11.0887	1.42288e-28	1.43228e-27	FMO6P	4.33516	0.267468	16.2081	4.41756e-59	5.27839e-57
LHX2	4.22291	0.222963	18.94	5.34148e-80	2.99441e-78	PLPPR5	-1.31461	0.191835	-6.85279	7.2422e-12	4.47176e-11
CNTNAP3	-2.30636	0.17417	-13.242	5.01939e-40	7.88128e-39	STMN1	1.31758	0.0960282	13.7207	7.62937e-43	3.75151e-41
PRUNE2	-1.4649	0.138235	-10.5972	3.07084e-26	2.77763e-25	PROX1	1.63233	0.157655	10.3538	4.02163e-25	6.82162e-24
CORO2A	1.41935	0.0911438	15.5727	1.11648e-54	2.90687e-53	CHRNB4	1.98436	0.22342	8.88174	6.58221e-19	7.2388e-18
OGN	-2.34433	0.192387	-12.1855	3.71559e-34	4.70584e-33	COLEC11	1.28503	0.154349	8.32549	8.39809e-17	7.86609e-16
ASPN	1.8388	0.158794	11.5798	5.2193e-31	5.80802e-30	TREH	-1.06916	0.160094	-6.6783	2.41727e-11	1.42042e-10
ECM2	-2.5717	0.113977	-22.5632	9.9544e-113	1.2986e-110	APOA1	-1.20733	0.21046	-5.73661	9.65921e-09	4.39746e-08
TLE4	-1.26797	0.0932838	-13.5926	4.42793e-42	7.47158e-41	KIF14	1.04278	0.128909	8.08933	5.99933e-16	5.25682e-15
LHX6	-1.69767	0.110213	-15.4035	1.54935e-53	3.86369e-52	TNNT2	1.63922	0.218655	7.49683	6.53821e-14	4.864e-13
RLN2	1.39822	0.181885	7.68739	1.50163e-14	7.7153e-14	MREG	-1.02058	0.071558	-14.2623	3.75781e-46	2.22861e-44
KANK1	-1.82682	0.0896472	-20.3779	2.62696e-92	2.07835e-90	TTR	-1.06554	0.278387	-3.82754	0.000129432	0.000359803
ELAVL2	2.58826	0.175332	14.7621	2.57325e-49	5.63748e-48	CASC1	-2.01339	0.123643	-16.2839	1.28462e-59	1.56966e-57
CA9	4.64913	0.285112	16.3063	8.89899e-60	2.69286e-58	ATP10B	2.05568	0.22551	9.11567	7.81836e-20	9.11786e-19
TYRP1	3.84434	0.253019	15.1939	3.88228e-52	9.31672e-51	ELOVL4	1.65991	0.152804	10.863	1.73001e-27	3.41445e-26
MPDZ	-1.18388	0.0756572	-15.648	3.42954e-55	9.07368e-54	ADGB	-2.86644	0.261912	-10.9443	7.0788e-28	1.43497e-26
LHX3	2.14909	0.433377	4.95894	7.08799e-07	2.14498e-06	PLAGL1	1.31931	0.114281	11.5444	7.87731e-31	1.8927e-29
PIP5K1B	-1.13537	0.156464	-7.25642	3.97467e-13	1.87593e-12	MYB	-1.58017	0.120769	-13.0843	4.0513e-39	1.6057e-37
APBA1	-1.25257	0.116773	-10.7266	7.63951e-27	7.09722e-26	GHRH	-6.06636	0.387237	-15.6657	2.59437e-55	2.54882e-53
SH3GL2	1.60708	0.2331	6.89437	5.41053e-12	2.39291e-11	RARRES1	2.42023	0.191976	12.607	1.93317e-36	6.47911e-35
PTGDS	-1.12119	0.167362	-6.6992	2.09557e-11	8.93066e-11	DNAH7	-1.8656	0.125517	-14.8634	5.69763e-50	4.21737e-48
SHB	1.03864	0.0730077	14.2264	6.28379e-46	1.23342e-44	TRPM6	2.09887	0.183373	11.4459	2.46582e-30	5.75409e-29
GATA3	1.81463	0.137405	13.2065	8.05188e-40	1.25584e-38	VSX2	2.57554	0.270574	9.51879	1.75201e-21	2.28853e-20
ATRNL1	1.27438	0.226918	5.61604	1.95378e-08	6.74149e-08	BBOF1	-1.38147	0.0817922	-16.89	5.33067e-64	8.15207e-62
CXCL12	-1.8875	0.103069	-18.313	6.52331e-75	3.14015e-73	DNAL1	-1.1056	0.0620199	-17.8265	4.40448e-71	9.47763e-69
CUBN	-1.59417	0.0972227	-16.3971	2.00528e-60	6.18248e-59	TGFB3	-1.3912	0.0924286	-15.0516	3.36774e-51	2.6544e-49
UNC5B	1.9754	0.0889588	22.2058	3.0182e-109	3.6465e-107	ATL2	1.25112	0.0683884	18.2943	9.18368e-75	2.30212e-72
CDH23	-1.97115	0.111346	-17.703	3.97588e-70	1.63064e-68	BCL11A	2.82265	0.199417	14.1545	1.75168e-45	9.95163e-44
VSIR	-1.58507	0.0912494	-17.3707	1.37435e-67	5.22592e-66	TECTB	1.50977	0.394616	3.82593	0.000130279	0.000361869
ACTA2	-1.58609	0.104057	-15.2425	1.84623e-52	4.46334e-51	ELOVL3	1.19377	0.17429	6.84931	7.42073e-12	4.57502e-11
TLX1	5.89034	0.339343	17.3581	1.71421e-67	6.49809e-66	NKX2-3	2.1638	0.426101	5.07814	3.81144e-07	1.46179e-06
KAZALD1	1.52543	0.135918	11.2232	3.13596e-29	3.23706e-28	PPP1R3C	-2.19345	0.163593	-13.408	5.43146e-41	2.40125e-39
FGF8	-1.32099	0.204954	-6.4453	1.15372e-10	4.66856e-10	CNNM1	1.73423	0.214579	8.08204	6.36942e-16	5.57107e-15
NEURL1	3.40851	0.195337	17.4494	3.4805e-68	1.34535e-66	SFRP5	1.05691	0.303169	3.48622	0.000489895	0.0012493
DKK1	2.20737	0.247284	8.92646	4.39839e-19	2.84856e-18	HOXB5	-1.79217	0.218988	-8.18388	2.74851e-16	2.47523e-15
EBF3	-2.75394	0.112093	-24.5683	2.7546e-133	5.8747e-131	CRHR1	2.88972	0.202873	14.244	4.88499e-46	2.87605e-44
SORCS1	1.41321	0.249899	5.65514	1.55723e-08	5.41318e-08	HOXB3	-1.7033	0.163096	-10.4436	1.56785e-25	2.73312e-24
UBE2S	2.49337	0.106747	23.3577	1.1519e-120	1.8525e-118	HOXB1	-3.309	0.267242	-12.382	3.26889e-35	1.021e-33
DNAJC12	2.0428	0.175749	11.6234	3.13527e-31	3.52652e-30	MSX2	-1.24562	0.148027	-8.41478	3.93625e-17	3.79282e-16
RUNDC3A	2.03501	0.202271	10.0608	8.23171e-24	6.6807e-23	EQTN	1.87328	0.200835	9.32745	1.0845e-20	1.34548e-19
CSF3	-3.77908	0.297273	-12.7125	5.0384e-37	7.11613e-36	MOB3B	1.40576	0.108321	12.9777	1.63767e-38	6.21713e-37
PSMD3	1.38634	0.117526	11.796	4.09217e-32	4.76791e-31	INSL6	1.48005	0.288964	5.1219	3.02467e-07	1.17524e-06
RAPGEFL1	1.30489	0.14659	8.90159	5.50515e-19	3.54707e-18	GRIA2	-4.46723	0.335369	-13.3203	1.76312e-40	7.58109e-39
ASPA	-3.54498	0.134308	-26.3944	1.5889e-153	5.0283e-151	MTHFD1L	1.66539	0.104086	16.0001	1.27536e-57	1.40321e-55
KRT37	3.34588	0.245171	13.6471	2.0997e-42	3.58491e-41	CCDC170	-3.57949	0.138452	-25.8537	2.2098e-147	1.0747e-143
HOXB6	1.52325	0.186018	8.18876	2.63933e-16	1.49463e-15	PLEKHG1	1.43081	0.0962961	14.8585	6.12988e-50	4.53043e-48
RASD1	-1.5953	0.155665	-10.2483	1.20458e-24	1.01316e-23	MAGEB4	4.07778	0.434854	9.37737	6.76396e-21	8.51509e-20
SLC6A4	3.98026	0.261859	15.2	3.53418e-52	8.48965e-51	TNN	-1.16252	0.169777	-6.84738	7.52157e-12	4.63425e-11
ALDH3A1	-1.47674	0.254459	-5.80345	6.49638e-09	2.32074e-08	TTLL2	2.61259	0.206221	12.6689	8.79097e-37	3.0213e-35
ICAM2	-1.43361	0.088965	-16.1143	2.02438e-58	5.89668e-57	LYZL1	2.03874	0.310255	6.57117	4.99223e-11	2.85923e-10
SYNGR2	1.17919	0.071557	16.479	5.19404e-61	1.62383e-59	CCDC77	1.10945	0.0735919	15.0757	2.33986e-51	1.85628e-49
ASIC2	1.6173	0.262828	6.15346	7.58127e-10	2.8994e-09	ENOX1	-1.00607	0.12617	-7.97392	1.53724e-15	1.30239e-14
CCL7	3.80448	0.286051	13.3	2.31509e-40	3.67627e-39	SPART-AS1	1.12888	0.127632	8.84484	9.16571e-19	9.97622e-18
CCL2	-1.10001	0.127178	-8.64934	5.17967e-18	3.18108e-17	DUSP4	-1.49029	0.160146	-9.30584	1.32944e-20	1.63924e-19
CCL1	1.85996	0.305218	6.09388	1.10206e-09	4.16441e-09	NPPB	1.61739	0.372654	4.34019	1.4236e-05	4.5243e-05
EZH1	-1.29308	0.0567106	-22.8015	4.4328e-115	6.1948e-113	TNFRSF8	1.00434	0.129864	7.73374	1.04431e-14	8.28749e-14
DLX4	2.02951	0.153481	13.2231	6.45077e-40	1.00836e-38	RDH10	1.85216	0.157665	11.7474	7.28103e-32	1.86458e-30
COL1A1	2.23483	0.126112	17.721	2.88881e-70	1.19378e-68	TBX4	2.0437	0.219068	9.32906	1.06811e-20	1.32678e-19
SGCA	-1.43264	0.157007	-9.12469	7.19413e-20	4.85868e-19	TEX14	-1.58969	0.190454	-8.34686	7.01033e-17	6.61594e-16
LRRC59	1.3067	0.0838946	15.5755	1.06836e-54	2.78454e-53	NCAPH	1.02378	0.106955	9.57212	1.04731e-21	1.39577e-20
CACNG1	2.933	0.210043	13.9638	2.59259e-44	4.78448e-43	LRAT	1.29371	0.195375	6.62167	3.55152e-11	2.05661e-10
HLF	-2.83614	0.151189	-18.7589	1.63736e-78	8.75854e-77	MND1	1.099	0.125914	8.7282	2.58768e-18	2.72089e-17
SLC16A6	2.42901	0.176772	13.7409	5.77253e-43	1.01018e-41	PRB2	3.32089	0.355522	9.34087	9.55416e-21	1.19074e-19
EFNB3	-1.2312	0.134004	-9.18777	4.01074e-20	2.7408e-19	BCL2L14	2.59144	0.155088	16.7095	1.11764e-62	1.59858e-60
MMD	-2.81429	0.097814	-28.7718	4.8334e-182	3.2039e-179	RGSL1	1.40393	0.276455	5.07832	3.80788e-07	1.46065e-06
MAP2K6	-1.02038	0.102631	-9.94224	2.72636e-23	2.16888e-22	GJB6	1.20576	0.321787	3.74706	0.000178918	0.00048745
RCVRN	-1.17887	0.13793	-8.54684	1.26507e-17	7.63649e-17	ADGRB2	-2.11931	0.144539	-14.6626	1.11973e-48	7.7239e-47
MYH1	-2.67132	0.187878	-14.2184	7.04804e-46	1.37957e-44	CSMD2	1.19461	0.141401	8.44843	2.95249e-17	2.87104e-16
SLC9A3R1	1.84625	0.11275	16.3747	2.90124e-60	8.90005e-59	SV2C	1.22706	0.169611	7.23455	4.67083e-13	3.21784e-12
MYH3	-1.33643	0.0932702	-14.3286	1.45046e-46	2.90518e-45	FLT3	-1.59438	0.196697	-8.10576	5.2417e-16	4.61624e-15
VTN	1.08354	0.1805	6.00303	1.93675e-09	7.20745e-09	PAEP	1.02538	0.240514	4.26327	2.01455e-05	6.27848e-05
TMEM97	1.52587	0.099274	15.3703	2.58977e-53	6.41258e-52	FMOD	-1.09485	0.14705	-7.44544	9.66186e-14	7.08376e-13
ALDOC	-1.93269	0.142913	-13.5235	1.13607e-41	1.88776e-40	MYOG	-3.00207	0.339285	-8.84823	8.89153e-19	9.68864e-18
PHOX2B	1.69084	0.622015	2.71833	0.00656125	0.012772	CD244	1.03537	0.13065	7.92475	2.28597e-15	1.91143e-14
GABRA4	-3.12957	0.329964	-9.48457	2.43374e-21	1.76362e-20	PTGFR	1.7985	0.176894	10.1671	2.77937e-24	4.43595e-23
UGT2B10	1.78879	0.423293	4.2259	2.3799e-05	6.24206e-05	KIAA0087	-2.00531	0.242584	-8.26646	1.37992e-16	1.27101e-15
CWH43	2.04818	0.280433	7.30365	2.80061e-13	1.33374e-12	WIPF3	1.42926	0.120899	11.8219	3.0066e-32	7.89918e-31
NMU	3.57738	0.220915	16.1935	5.60624e-59	1.65661e-57	NXPH1	-6.2047	0.385303	-16.1034	2.41306e-58	2.72906e-56
KIAA1211	2.66646	0.144398	18.466	3.87709e-76	1.93862e-74	NPY	2.323	0.446144	5.20684	1.9208e-07	7.63094e-07
PF4V1	-1.13	0.29085	-3.88515	0.000102268	0.000249761	GLIPR2	1.63215	0.0954562	17.0985	1.5235e-65	2.49459e-63
MAPK10	-2.03104	0.144064	-14.0981	3.89875e-45	7.43841e-44	SPINK4	-4.81896	0.287693	-16.7503	5.63101e-63	8.15004e-61
TBC1D9	1.01607	0.138162	7.35416	1.92129e-13	9.25402e-13	PHF24	2.9924	0.194917	15.3522	3.42463e-53	2.97398e-51
ANXA10	1.45245	0.222687	6.52236	6.92086e-11	2.84562e-10	DNAI1	-1.85822	0.171729	-10.8207	2.74708e-27	5.34159e-26
GALNT7	1.25414	0.110464	11.3534	7.13543e-30	7.58084e-29	DCAF10	-1.03331	0.0975656	-10.5909	3.28395e-26	5.98807e-25
SOD3	-2.34099	0.149024	-15.7089	1.31459e-55	3.52947e-54	AKR1D1	1.16472	0.232517	5.00918	5.46614e-07	2.06049e-06
TRIM2	-1.1773	0.132806	-8.8648	7.66428e-19	4.8958e-18	NUDT10	-1.20829	0.171855	-7.03091	2.05189e-12	1.33868e-11
NEIL3	3.40941	0.122021	27.9412	8.4411e-172	4.2686e-169	SFTPA1	-2.2754	0.422033	-5.39153	6.98619e-08	2.90978e-07
SH3D19	-1.98511	0.073226	-27.1094	7.627e-162	2.9929e-159	NEUROG3	-2.45448	0.337189	-7.27925	3.35688e-13	2.34549e-12
NKX3-2	2.97693	0.166337	17.897	1.24523e-71	5.38632e-70	CHST3	1.42167	0.107	13.2866	2.76781e-40	1.17865e-38
BST1	-1.17334	0.0814691	-14.4023	5.00611e-47	1.02402e-45	ARL4AP1	-1.69901	0.56175	-3.02449	0.00249052	0.00565094
HGFAC	1.58866	0.193268	8.21999	2.03524e-16	1.15788e-15	MED13L	-1.1029	0.0929809	-11.8615	1.8753e-32	4.99713e-31
FAM149A	-2.13954	0.105665	-20.2482	3.68287e-91	2.85842e-89	WWP1	-1.7107	0.102487	-16.692	1.49975e-62	2.12637e-60
NCAPG	3.07175	0.113791	26.9947	1.7036e-160	6.3308e-158	CCDC70	-1.0811	0.293261	-3.68646	0.000227395	0.00061093
PPARGC1A	-1.21712	0.195152	-6.23678	4.46661e-10	1.73941e-09	ATP7B	-2.15004	0.12088	-17.7865	8.99243e-71	1.88496e-68
CRYAB	-2.79054	0.190671	-14.6354	1.6706e-48	3.56444e-47	NEUROD4	-2.38384	0.869222	-2.7425	0.00609734	0.0129259
ZBTB16	-3.01578	0.206892	-14.5766	3.96024e-48	8.35158e-47	STIL	1.1089	0.0949523	11.6785	1.64102e-31	4.08834e-30
B3GAT1	-1.21227	0.219351	-5.52663	3.26443e-08	1.10508e-07	HJURP	1.23711	0.110938	11.1514	7.04668e-29	1.5143e-27
MS4A4A	-1.18135	0.107345	-11.0051	3.61072e-28	3.56149e-27	COL10A1	-1.2791	0.1564	-8.17836	2.87728e-16	2.58642e-15
ST3GAL4	1.0397	0.0898215	11.5752	5.50334e-31	6.11438e-30	AMD1	1.15595	0.0818194	14.128	2.55195e-45	1.43307e-43
CCND1	1.31515	0.133261	9.869	5.67283e-23	4.43095e-22	NRK	-1.33373	0.187231	-7.12343	1.05273e-12	7.04005e-12
CCKBR	3.27378	0.357277	9.16316	5.04007e-20	3.43178e-19	ESX1	5.31104	0.52081	10.1976	2.03149e-24	3.27456e-23
HPX	1.92073	0.197579	9.72131	2.44618e-22	1.85456e-21	KCNJ2	1.16239	0.109816	10.5849	3.50217e-26	6.37402e-25
APOA5	1.73279	0.312156	5.55102	2.8401e-08	9.67112e-08	C4BPA	1.68992	0.262033	6.44924	1.12414e-10	6.22216e-10
APOC3	2.41913	0.511258	4.73172	2.22623e-06	6.44027e-06	GPR83	1.13101	0.170541	6.63188	3.31428e-11	1.9245e-10
UPK2	1.35453	0.17043	7.94773	1.89967e-15	1.02523e-14	DAW1	1.75749	0.387815	4.53177	5.84904e-06	1.95066e-05
SLC1A2	1.43054	0.17797	8.03807	9.12646e-16	5.01424e-15	MOGAT1	2.6835	0.2338	11.4778	1.70608e-30	4.01006e-29
CD5	1.30737	0.144178	9.06778	1.21469e-19	8.12422e-19	HMGB1P1	1.94465	0.118504	16.4101	1.61999e-60	2.07321e-58
SCGB2A2	1.45457	0.30866	4.71252	2.44671e-06	7.05146e-06	PI3	4.38516	0.314809	13.9296	4.18802e-44	2.22587e-42
MDK	1.42721	0.119646	11.9286	8.39648e-33	1.00774e-31	SLPI	3.50135	0.23298	15.0286	4.77257e-51	3.73744e-49
SLC22A18	1.20952	0.0973546	12.4239	1.93962e-35	2.58469e-34	PREX1	-1.98459	0.122272	-16.231	3.04607e-59	3.67576e-57
SLC35F2	1.14355	0.104115	10.9835	4.58819e-28	4.5057e-27	KCNS1	3.62097	0.212236	17.0611	2.89229e-65	4.64208e-63
CALCA	1.71108	0.355039	4.81941	1.43981e-06	4.23998e-06	ARHGAP40	-1.48358	0.277883	-5.33885	9.35365e-08	3.8383e-07
TCIRG1	1.0192	0.0868283	11.7381	8.1316e-32	9.36097e-31	SEMG2	2.47364	0.628656	3.9348	8.32654e-05	0.000237913
VWF	-2.04982	0.0947622	-21.6312	9.1417e-104	9.7908e-102	MATN4	4.0258	0.233669	17.2286	1.6199e-66	2.77385e-64
TSPAN11	-1.19529	0.108712	-10.995	4.04098e-28	3.98108e-27	PARD6B	-2.3231	0.144156	-16.1152	1.99568e-58	2.28357e-56
SYT10	1.18017	0.338907	3.48229	0.000497152	0.00112131	GDAP1L1	-1.27095	0.196343	-6.4731	9.60126e-11	5.35089e-10
CYP27B1	1.496	0.137946	10.8448	2.11079e-27	2.00851e-26	GTSF1L	1.01756	0.221718	4.58946	4.44402e-06	1.50458e-05
KRT18	1.66865	0.108975	15.3122	6.33783e-53	1.55209e-51	SNAI1	1.14904	0.101995	11.2656	1.94021e-29	4.30842e-28
ACSS3	-1.23057	0.129896	-9.47349	2.70646e-21	1.95519e-20	RBPJL	1.48369	0.202131	7.34027	2.13161e-13	1.51509e-12
TNS2	-1.63926	0.0775629	-21.1346	3.8221e-99	3.64043e-97	C20orf85	-4.75067	0.434403	-10.9361	7.74687e-28	1.56453e-26
FOXM1	3.46206	0.128248	26.995	1.6922e-160	6.3308e-158	BCAS4	-1.48739	0.105064	-14.157	1.69115e-45	9.61897e-44
PRMT8	1.75958	0.23657	7.43786	1.02331e-13	5.0095e-13	KCNK15	-3.16959	0.16382	-19.348	2.11931e-83	7.74919e-81
MYL2	-1.25896	0.228545	-5.50859	3.61718e-08	1.21995e-07	PCK1	-1.45586	0.262174	-5.55304	2.80741e-08	1.21964e-07
RAD51AP1	2.27739	0.105756	21.5344	7.4087e-103	7.7487e-101	ZBP1	1.08774	0.16624	6.54316	6.02328e-11	3.42394e-10
KCNA1	-2.19216	0.191832	-11.4275	3.04681e-30	3.289e-29	MAGEA10	2.38776	0.539327	4.42729	9.54258e-06	3.0979e-05
ALDH2	-2.24973	0.106752	-21.0745	1.3646e-98	1.2823e-96	CHST8	-1.7222	0.239036	-7.20477	5.81399e-13	3.97107e-12
GSG1	1.01199	0.186321	5.43141	5.59094e-08	1.85314e-07	IL17C	1.07725	0.243114	4.43106	9.37688e-06	3.04777e-05
OAS3	1.57034	0.114778	13.6815	1.30958e-42	2.26108e-41	HIF3A	2.37268	0.202002	11.7458	7.41825e-32	1.89672e-30
OAS2	1.70036	0.130869	12.9928	1.34362e-38	2.00876e-37	NDP	-2.86635	0.265657	-10.7896	3.85321e-27	7.40947e-26
ART4	-1.38038	0.222539	-6.20284	5.5454e-10	2.14302e-09	GRM4	-2.43237	0.209339	-11.6193	3.28952e-31	8.0672e-30
RERGL	-2.80373	0.215329	-13.0207	9.33369e-39	1.40054e-37	TRERF1	-1.29865	0.0953501	-13.6198	3.05415e-42	1.4434e-40
ENDOU	-1.03994	0.144421	-7.20073	5.98924e-13	2.80195e-12	BTN1A1	1.29739	0.186711	6.94864	3.68825e-12	2.3483e-11
ADGRD1	-2.51549	0.139516	-18.0302	1.12954e-72	5.03234e-71	HIST1H1D	-1.01606	0.218199	-4.65657	3.21522e-06	1.1072e-05
TBC1D30	1.14843	0.0935878	12.2711	1.29482e-34	1.67141e-33	HIST1H1A	1.02619	0.401301	2.55716	0.0105531	0.0214248
IFNG	1.90127	0.221318	8.59066	8.64737e-18	5.26071e-17	HIST1H2BJ	1.18402	0.161589	7.32736	2.3473e-13	1.66256e-12
TIMELESS	1.53043	0.0701676	21.8111	1.82e-105	2.0289e-103	SPDEF	-1.75755	0.137208	-12.8094	1.45188e-37	5.20311e-36
GAPDH	1.16367	0.0841764	13.8241	1.8226e-43	3.25335e-42	TCP11	1.44335	0.242704	5.94697	2.73145e-09	1.32014e-08
CDCA3	3.05354	0.115105	26.5282	4.5831e-155	1.519e-152	RIOK1	1.04649	0.0595875	17.5623	4.79124e-69	9.20959e-67
ENO2	1.45668	0.119903	12.1489	5.8169e-34	7.29559e-33	NRN1	1.01607	0.119078	8.53281	1.42837e-17	1.41617e-16
APOBEC1	2.24863	0.467305	4.81191	1.49494e-06	4.39522e-06	DEK	1.16848	0.0724289	16.1327	1.50276e-58	1.74002e-56
GYS2	-4.79922	0.231508	-20.7303	1.84755e-95	1.58993e-93	CRISP1	-2.16479	0.375542	-5.76443	8.19332e-09	3.75967e-08
COL12A1	1.53074	0.123137	12.4312	1.7706e-35	2.36589e-34	OPN5	1.08775	0.276044	3.94051	8.13073e-05	0.000232646
NEDD9	-1.29782	0.0990502	-13.1027	3.17908e-39	4.85947e-38	AC105760.1	-1.49606	0.34823	-4.29617	1.73771e-05	5.45555e-05
FAM184A	-1.16327	0.115947	-10.0328	1.09378e-23	8.82725e-23	RAB17	-1.42252	0.0925744	-15.3662	2.7591e-53	2.40894e-51
NCOA7	-1.03836	0.111764	-9.29065	1.53343e-20	1.06843e-19	TRIM51	2.31455	0.55361	4.18084	2.90437e-05	8.85366e-05
SASH1	-1.26826	0.0951293	-13.3319	1.50976e-40	2.40992e-39	MYRF	1.27612	0.133545	9.55577	1.22673e-21	1.62465e-20
UST	-1.18586	0.115728	-10.247	1.22108e-24	1.02668e-23	SCGB1D2	-4.75993	0.315349	-15.0942	1.76914e-51	1.41272e-49
ULBP1	3.10542	0.185559	16.7355	7.2287e-63	2.38135e-61	SCGB2A1	-2.55975	0.265817	-9.62976	5.9872e-22	8.09012e-21
BMP5	-1.50382	0.253251	-5.93806	2.8841e-09	1.06106e-08	AHNAK	-1.06806	0.0836033	-12.7753	2.25172e-37	8.00462e-36
BACH2	-1.36748	0.112655	-12.1387	6.58973e-34	8.25012e-33	RAP2A	1.04906	0.0727296	14.4241	3.6515e-47	2.29723e-45
RBM24	1.68999	0.222963	7.57969	3.46387e-14	1.74159e-13	BMP4	-1.80303	0.15265	-11.8115	3.40309e-32	8.92159e-31
FHL5	-2.60596	0.132965	-19.5988	1.5832e-85	1.05659e-83	SOX9	1.03065	0.120442	8.5572	1.15642e-17	1.15597e-16
PRDM13	3.94516	0.544587	7.24432	4.34619e-13	2.04753e-12	MYH2	-1.21117	0.218949	-5.53175	3.17059e-08	1.3685e-07
SIM1	-1.45215	0.222502	-6.52645	6.73452e-11	2.77086e-10	C1orf61	2.93125	0.170181	17.2243	1.74392e-66	2.96534e-64
HDGFL1	1.48876	0.290858	5.11849	3.07995e-07	9.61115e-07	KIR2DL1	1.2011	0.235252	5.10561	3.29729e-07	1.27566e-06
BVES	-1.08949	0.113734	-9.57931	9.7692e-22	7.2125e-21	SRMS	-1.27067	0.134606	-9.43994	3.73011e-21	4.76613e-20
COL9A1	1.56194	0.271491	5.75318	8.75817e-09	3.1005e-08	IL37	1.26781	0.205754	6.1618	7.19241e-10	3.68571e-09
GPLD1	-2.67008	0.125596	-21.2593	2.705e-100	2.65901e-98	MED1	-1.03221	0.135017	-7.64507	2.0883e-14	1.61946e-13
SOBP	-1.62772	0.107669	-15.1178	1.23654e-51	2.92735e-50	CD70	1.38866	0.152719	9.0929	9.64358e-20	1.11848e-18
EPM2A	-1.14321	0.062462	-18.3025	7.89788e-75	3.78327e-73	FOSB	-1.03087	0.203951	-5.05448	4.31562e-07	1.64555e-06
UNC93A	2.93077	0.377818	7.7571	8.6892e-15	4.52322e-14	TGM3	-2.47651	0.227828	-10.8701	1.60102e-27	3.16629e-26
PACRG	-1.71266	0.128795	-13.2976	2.39112e-40	3.79577e-39	FOXA2	2.32878	0.39329	5.92129	3.19434e-09	1.5332e-08
QKI	-1.24744	0.0722621	-17.2627	8.98782e-67	3.32482e-65	CST8	-2.87768	0.528644	-5.44352	5.22382e-08	2.20789e-07
C6orf118	2.06362	0.34008	6.06804	1.29483e-09	4.86919e-09	CST11	-2.05346	0.418747	-4.90382	9.399e-07	3.44656e-06
DNPH1	1.03986	0.100865	10.3094	6.39314e-25	5.4406e-24	BMP2	1.89796	0.14603	12.9971	1.27056e-38	4.85758e-37
TTK	2.86784	0.121498	23.604	3.5052e-123	6.0755e-121	FLRT3	-2.07556	0.200904	-10.3311	5.09562e-25	8.57458e-24
LAMA4	-1.52165	0.0862049	-17.6516	9.89111e-70	4.00701e-68	PCSK2	-3.55709	0.366114	-9.71578	2.58263e-22	3.59256e-21
CLIC5	-2.52957	0.117759	-21.4808	2.3552e-102	2.4373e-100	LAMP5	-1.60384	0.133639	-12.0013	3.49682e-33	9.70628e-32
ENPP5	1.27542	0.145826	8.74623	2.20599e-18	1.37915e-17	LRRN4	1.10962	0.215719	5.14382	2.69201e-07	1.05187e-06
TBX18	-1.17684	0.116448	-10.1061	5.18875e-24	4.24622e-23	TCF15	1.4997	0.158096	9.486	2.40075e-21	3.09685e-20
SEMA5A	-1.44307	0.11454	-12.5989	2.14209e-36	2.96233e-35	OTOR	-2.025	0.26552	-7.62655	2.41118e-14	1.86213e-13
C7	-1.6366	0.219268	-7.46395	8.39658e-14	4.12901e-13	CITED1	-2.50746	0.227104	-11.041	2.42314e-28	5.04235e-27
GHR	-3.1074	0.132017	-23.5378	1.6735e-122	2.821e-120	GDF5	3.07632	0.210525	14.6127	2.3324e-48	1.58861e-46
KIF20A	3.37526	0.116251	29.0343	2.4267e-185	1.7766e-182	BPIFB1	-3.45115	0.249781	-13.8167	2.02209e-43	1.02434e-41
MRPS30	1.64556	0.13689	12.0211	2.75326e-33	3.36707e-32	GRPR	-4.87474	0.234388	-20.7977	4.53722e-96	3.10774e-93
HBEGF	-1.12849	0.100664	-11.2105	3.62115e-29	3.72848e-28	SLURP1	2.10817	0.322182	6.54342	6.01266e-11	3.4187e-10
GZMK	1.5246	0.170614	8.93595	4.03686e-19	2.61961e-18	KIRREL2	1.27028	0.242849	5.23073	1.68841e-07	6.74962e-07
HAND1	1.3751	0.445895	3.0839	0.00204309	0.00425734	FFAR2	-2.04315	0.183385	-11.1413	7.89401e-29	1.6934e-27
PDE8B	-1.2873	0.128518	-10.0165	1.28987e-23	1.0391e-22	FFAR1	-1.34497	0.266744	-5.04216	4.60305e-07	1.74952e-06
PCDHB15	-1.20586	0.0960195	-12.5585	3.57099e-36	4.90106e-35	CCR7	1.07723	0.166619	6.46524	1.01137e-10	5.62552e-10
IL12B	2.22052	0.192241	11.5507	7.32174e-31	8.098e-30	HTN1	3.71728	0.731959	5.07854	3.80345e-07	1.45918e-06
RASGRF2	-1.41067	0.101271	-13.9296	4.18483e-44	7.65092e-43	WNK4	-2.97339	0.203354	-14.6217	2.0424e-48	1.39893e-46
GABRG2	2.83666	0.575132	4.93218	8.1315e-07	2.44733e-06	SIX1	-1.07275	0.175695	-6.10574	1.02325e-09	5.16255e-09
LMNB1	2.44882	0.092574	26.4525	3.4108e-154	1.0935e-151	DLGAP5	1.06071	0.112683	9.41323	4.81124e-21	6.10902e-20
ARRDC3	-1.40017	0.0777646	-18.0053	1.7713e-72	7.85584e-71	PRDM7	1.33772	0.193439	6.9155	4.6622e-12	2.93575e-11
NPR3	-2.02141	0.173721	-11.6359	2.70715e-31	3.05056e-30	AIF1L	1.52183	0.142762	10.6599	1.56778e-26	2.91003e-25
SLC27A6	-2.03468	0.203963	-9.9757	1.9472e-23	1.55915e-22	ZC4H2	1.34364	0.114928	11.6911	1.41563e-31	3.55412e-30
AGXT2	1.3144	0.198947	6.60676	3.92829e-11	1.64159e-10	OMD	-1.67353	0.157955	-10.595	3.14331e-26	5.73592e-25
PRLR	1.23811	0.117258	10.5589	4.62031e-26	4.15159e-25	FGD3	-1.99278	0.14177	-14.0565	7.03102e-45	3.86356e-43
FGF1	-2.05712	0.106706	-19.2784	8.15226e-83	4.94907e-81	EDN2	1.08536	0.173985	6.23822	4.42586e-10	2.31509e-09
NR3C1	-1.68586	0.0800983	-21.0473	2.41905e-98	2.24309e-96	BCL11B	1.14026	0.155961	7.31121	2.64741e-13	1.86615e-12
LIFR	-2.55054	0.111332	-22.9093	3.7547e-116	5.417e-114	ATP13A4	1.09803	0.230017	4.77369	1.80879e-06	6.41833e-06
H2AFY	1.08163	0.043609	24.8029	8.3411e-136	1.8598e-133	HRASLS	1.84626	0.183277	10.0736	7.22736e-24	1.12256e-22
UNC5A	2.24793	0.189622	11.8548	2.03175e-32	2.39225e-31	BEST3	-1.15566	0.21705	-5.32441	1.01283e-07	4.14152e-07
EHHADH	-1.02576	0.0836693	-12.2597	1.49127e-34	1.91994e-33	TAS2R3	-1.48474	0.239314	-6.20413	5.50004e-10	2.84909e-09
SMC4	1.51277	0.0929095	16.2821	1.32184e-59	3.98517e-58	AUNIP	1.26737	0.106651	11.8833	1.44542e-32	3.88142e-31
KNG1	2.06449	0.331651	6.2249	4.8187e-10	1.87088e-09	OR7C1	1.5542	0.229036	6.78586	1.154e-11	6.99752e-11
HRG	1.29337	0.396502	3.26195	0.00110647	0.00239011	FBXL16	-1.05146	0.14403	-7.3003	2.8712e-13	2.01718e-12
BCL6	-1.12824	0.078212	-14.4253	3.58453e-47	7.35375e-46	GNG13	-2.43034	0.236881	-10.2597	1.06995e-24	1.75608e-23
HGD	1.17128	0.203458	5.75686	8.56905e-09	3.03552e-08	KDM4B	-1.54789	0.08913	-17.3667	1.47439e-67	2.58848e-65
AMOTL2	-1.45458	0.0730269	-19.9184	2.81766e-88	2.03853e-86	TUBA4A	1.24483	0.124885	9.96783	2.1079e-23	3.1551e-22
RBP2	1.95194	0.202509	9.63881	5.48224e-22	4.10056e-21	CASD1	-1.36473	0.120412	-11.3339	8.91768e-30	2.02274e-28
RBP1	1.07401	0.169246	6.34585	2.21197e-10	8.78912e-10	VPREB3	1.63919	0.195029	8.40487	4.28334e-17	4.11259e-16
KAT2B	-1.40802	0.0787446	-17.8808	1.66394e-71	7.14707e-70	POM121L9P	1.20529	0.149237	8.07638	6.67173e-16	5.82605e-15
LRRC31	2.40668	0.273652	8.79466	1.43485e-18	9.05822e-18	MGAT3	1.64217	0.140497	11.6883	1.46293e-31	3.67099e-30
PFKFB4	1.27651	0.0723105	17.6532	9.62298e-70	3.9075e-68	CDC42EP1	1.24463	0.0920265	13.5247	1.1182e-41	5.11562e-40
ECT2	1.89776	0.085017	22.3221	2.2553e-110	2.8078e-108	BAIAP2L2	1.89582	0.155029	12.2288	2.18043e-34	6.51329e-33
GNAT1	1.63735	0.237838	6.88431	5.80665e-12	2.56348e-11	IGLL1	1.58494	0.262283	6.04285	1.51418e-09	7.52111e-09
HYAL1	-1.58076	0.127865	-12.3628	4.15392e-35	5.45976e-34	LIF	1.23249	0.146449	8.41582	3.90165e-17	3.76023e-16
CYB561D2	1.0202	0.0706657	14.4369	3.03069e-47	6.23318e-46	C22orf23	1.17177	0.100859	11.6179	3.34306e-31	8.19438e-30
GBE1	-1.55119	0.0747328	-20.7564	1.07279e-95	9.33024e-94	KRT17	2.27548	0.228793	9.94557	2.63652e-23	3.92099e-22
C3orf52	1.56195	0.126728	12.3252	6.6247e-35	8.64471e-34	CPA4	2.59698	0.206091	12.6011	2.08171e-36	6.95301e-35
PODXL2	1.68074	0.117637	14.2875	2.61863e-46	5.20669e-45	CDHR3	-1.54128	0.17521	-8.79678	1.40804e-18	1.50858e-17
CSPG5	1.07579	0.128466	8.37414	5.56284e-17	3.24843e-16	SMO	1.41261	0.109384	12.9142	3.74381e-38	1.39514e-36
KIAA1257	1.91983	0.12908	14.8732	4.92114e-50	1.10527e-48	LRRC17	-2.07054	0.136376	-15.1825	4.61647e-52	3.77317e-50
PLSCR4	-2.09301	0.0914716	-22.8815	7.1029e-116	1.0188e-113	FEZF1	1.33498	0.342821	3.8941	9.8564e-05	0.000278646
CISH	1.11093	0.100524	11.0514	2.159e-28	2.15513e-27	PDE11A	-1.03319	0.145408	-7.1055	1.19885e-12	7.98208e-12
PEX5L	1.97761	0.217982	9.07234	1.16483e-19	7.79711e-19	GAD1	-1.50342	0.23386	-6.42873	1.28679e-10	7.08373e-10
ABCC5	1.16598	0.100629	11.5869	4.79934e-31	5.35405e-30	HOXD13	2.53772	0.232235	10.9274	8.52462e-28	1.71519e-26
AADAC	-3.93905	0.298701	-13.1873	1.03883e-39	1.6146e-38	ARHGAP22	1.2047	0.0968611	12.4374	1.63768e-35	5.17157e-34
CLCN2	1.31868	0.074326	17.7418	1.99366e-70	8.25257e-69	MYO5C	-1.15176	0.0810376	-14.2127	7.63916e-46	4.42262e-44
RTKN	1.04674	0.065792	15.9098	5.41764e-57	1.5125e-55	CHAC1	1.27244	0.145221	8.7621	1.91644e-18	2.03002e-17
CCL20	2.36729	0.198124	11.9485	6.60844e-33	7.97631e-32	BBOX1	2.41145	0.229824	10.4926	9.34089e-26	1.65064e-24
CENPA	3.27482	0.130142	25.1635	1.0061e-139	2.3727e-137	MYOD1	2.06291	0.367854	5.60796	2.04725e-08	9.02136e-08
FNDC4	-1.4425	0.110345	-13.0726	4.72019e-39	7.17048e-38	KCNC1	-2.8013	0.239829	-11.6804	1.60548e-31	4.00801e-30
PDE1A	-1.18513	0.0974099	-12.1664	4.69127e-34	5.9095e-33	TPH1	-1.54963	0.198261	-7.8161	5.44857e-15	4.42501e-14
REEP6	1.20595	0.15575	7.74282	9.72365e-15	5.04991e-14	SOX15	1.06457	0.180179	5.90844	3.4536e-09	1.65047e-08
PCSK4	1.48437	0.131472	11.2904	1.46444e-29	1.53131e-28	PIMREG	1.53911	0.119905	12.836	1.03009e-37	3.73281e-36
GRB14	1.67618	0.228916	7.32223	2.43883e-13	1.16712e-12	AIPL1	1.89649	0.304974	6.21851	5.01885e-10	2.60844e-09
CLIP4	-1.71558	0.119783	-14.3224	1.58657e-46	3.17522e-45	LRRC6	-1.38229	0.128018	-10.7977	3.53113e-27	6.81168e-26
TLX2	2.08137	0.20814	9.99984	1.5265e-23	1.2269e-22	KLK14	1.17551	0.264464	4.44487	8.79439e-06	2.86899e-05
SPTBN1	-1.99169	0.06774	-29.4019	5.1932e-190	4.3176e-187	KLK10	2.7195	0.277379	9.80428	1.07915e-22	1.53676e-21
TACR1	-2.5415	0.171514	-14.818	1.12011e-49	2.48614e-48	KLK8	3.10441	0.295804	10.4948	9.12666e-26	1.61455e-24
ACADL	-3.29452	0.233465	-14.1114	3.22928e-45	6.17794e-44	RIPK3	-1.08106	0.113671	-9.51046	1.8982e-21	2.47285e-20
EFEMP1	-1.89239	0.132376	-14.2956	2.32971e-46	4.63786e-45	FOXA1	-2.72696	0.135464	-20.1305	3.98663e-90	2.22844e-87
REG1A	2.89186	0.778346	3.71539	0.000202894	0.000479401	EPB41L4A	-1.19586	0.122371	-9.77244	1.47847e-22	2.08586e-21
FN1	2.86885	0.123173	23.2913	5.4296e-120	8.4819e-118	QRICH2	1.44035	0.108687	13.2523	4.37355e-40	1.83829e-38
STAT1	1.24906	0.101703	12.2814	1.14049e-34	1.47452e-33	FOXJ1	-1.45295	0.262004	-5.54551	2.93094e-08	1.27036e-07
DNAH6	-1.00678	0.135793	-7.41406	1.22487e-13	5.96647e-13	AANAT	1.28941	0.148522	8.68162	3.90179e-18	4.04925e-17
PECR	-1.35092	0.083002	-16.2757	1.46724e-59	4.41271e-58	MAP7D3	1.18771	0.0944006	12.5816	2.66653e-36	8.83954e-35
ELMOD3	-1.41919	0.0574098	-24.7203	6.4709e-135	1.417e-132	ART1	-1.01685	0.251677	-4.04028	5.33866e-05	0.00015674
EHBP1	-1.26408	0.0605437	-20.8788	8.34303e-97	7.49528e-95	SGO1	1.03538	0.119127	8.69136	3.58118e-18	3.72208e-17
OTX1	2.52778	0.16714	15.1238	1.12906e-51	2.6755e-50	RPS4Y1	-1.57558	0.589251	-2.67387	0.00749824	0.0156454
HSPE1	1.15439	0.071217	16.2095	4.32171e-59	1.28322e-57	PLPPR3	-2.53235	0.219375	-11.5435	7.96157e-31	1.912e-29
SMYD1	-4.92063	0.28011	-17.5668	4.42727e-69	1.75417e-67	LBP	2.37291	0.316842	7.48926	6.92637e-14	5.14097e-13
MLPH	1.53421	0.1463	10.4867	9.94293e-26	8.80998e-25	SYT5	-1.5039	0.242848	-6.19276	5.91212e-10	3.05117e-09
PASK	1.12594	0.0644895	17.4593	2.92352e-68	1.13453e-66	CBFA2T3	-1.29318	0.146744	-8.81249	1.22392e-18	1.31741e-17
TPO	-1.47019	0.128182	-11.4695	1.87671e-30	2.04474e-29	GAMT	-1.54503	0.135704	-11.3853	4.94958e-30	1.13754e-28
PROC	2.58943	0.124208	20.8475	1.60482e-96	1.43127e-94	PRRG3	1.34836	0.16747	8.0513	8.19167e-16	7.10105e-15
QPCT	1.27223	0.133513	9.52889	1.58972e-21	1.16265e-20	CRACR2A	-1.0304	0.116628	-8.83492	1.00174e-18	1.08668e-17
DLX2	1.99404	0.264906	7.52732	5.17908e-14	2.58149e-13	NXNL2	-3.2776	0.182541	-17.9555	4.34979e-72	9.70343e-70
LCT	1.54802	0.266383	5.81124	6.20115e-09	2.21883e-08	ANGPTL8	-1.12092	0.184564	-6.07333	1.25286e-09	6.27413e-09
SDC1	1.92495	0.113204	17.0043	7.63472e-65	2.68843e-63	DPP6	1.0567	0.218216	4.84244	1.28257e-06	4.62913e-06
SLC1A4	1.00059	0.0952979	10.4996	8.67155e-26	7.70435e-25	ACE2	4.56424	0.265583	17.1857	3.39762e-66	5.71729e-64
RND3	-1.36855	0.107477	-12.7335	3.85356e-37	5.46473e-36	NCAN	4.92442	0.347746	14.161	1.59794e-45	9.11015e-44
PCYOX1	-1.07516	0.0644517	-16.6816	1.78394e-62	5.82207e-61	KIF1A	2.44886	0.297874	8.22114	2.01571e-16	1.83397e-15
KISS1R	4.44427	0.237239	18.7333	2.64802e-78	1.41032e-76	FUT5	2.78979	0.332527	8.38969	4.87442e-17	4.65713e-16
EPAS1	-1.93691	0.0831007	-23.3079	3.684e-120	5.7734e-118	STK33	1.66649	0.191731	8.69179	3.56764e-18	3.7096e-17
CD207	1.42145	0.188333	7.54751	4.43665e-14	2.21909e-13	EPO	-1.316	0.253181	-5.19786	2.01601e-07	7.98765e-07
GRIN3B	1.04318	0.161639	6.45373	1.09131e-10	4.42258e-10	CACNG6	-3.44739	0.357508	-9.64285	5.27016e-22	7.16703e-21
VAX2	1.11268	0.151846	7.32772	2.34093e-13	1.12224e-12	KLHDC7B	2.56631	0.204189	12.5683	3.15399e-36	1.03988e-34
PARD3B	-1.12007	0.0709262	-15.792	3.53175e-56	9.66737e-55	GDF15	-1.91462	0.17678	-10.8305	2.46699e-27	4.81816e-26
BCL9	1.24691	0.0651065	19.1518	9.34283e-82	5.47532e-80	HRC	-1.31816	0.130208	-10.1235	4.34493e-24	6.83371e-23
MARK1	-1.12036	0.126653	-8.84593	9.07714e-19	5.77799e-18	SULT4A1	1.42975	0.23722	6.02709	1.66936e-09	8.257e-09
TNR	2.20674	0.180374	12.2342	2.0407e-34	2.61359e-33	SAG	-2.54392	0.194705	-13.0655	5.18344e-39	2.0411e-37
TPSG1	2.47487	0.249186	9.93181	3.02709e-23	2.40266e-22	TNNI2	1.89415	0.182419	10.3835	2.94777e-25	5.04054e-24
PAPPA2	-2.65357	0.167122	-15.878	8.9934e-57	2.49799e-55	CYP2G1P	-4.40975	0.280694	-15.7102	1.28766e-55	1.28583e-53
RALGPS2	1.18353	0.10773	10.986	4.4605e-28	4.38646e-27	CALY	-2.05339	0.24305	-8.44841	2.95305e-17	2.87104e-16
ANGPTL1	-3.05455	0.149189	-20.4743	3.64737e-93	2.96701e-91	GATA5	-1.01126	0.367641	-2.75066	0.00594756	0.0126304
OPRD1	2.7783	0.202965	13.6886	1.18829e-42	2.05819e-41	ASS1	1.15202	0.154189	7.47148	7.92985e-14	5.85896e-13
KCNC4	-1.36185	0.100635	-13.5326	1.00368e-41	1.67174e-40	NPAS1	-1.61896	0.130866	-12.3711	3.74632e-35	1.16563e-33
SCAMP3	1.03741	0.0574112	18.0698	5.5106e-73	2.48671e-71	THEMIS2	1.09765	0.0986903	11.1221	9.79241e-29	2.08592e-27
DLGAP3	1.54183	0.159738	9.65224	4.80913e-22	3.60203e-21	DUSP9	2.45577	0.246165	9.97611	1.93925e-23	2.91523e-22
RHOU	-1.46271	0.113672	-12.8679	6.82664e-38	9.97201e-37	PKDREJ	1.23723	0.121527	10.1807	2.41769e-24	3.8714e-23
LAMTOR2	1.37683	0.0756519	18.1995	5.20644e-74	2.42072e-72	RGN	1.16673	0.180474	6.46482	1.01421e-10	5.64068e-10
FBXO6	1.03141	0.0716379	14.3976	5.35883e-47	1.09207e-45	POLN	-1.29918	0.115283	-11.2695	1.85667e-29	4.13234e-28
LEPR	-2.92759	0.117382	-24.9407	2.693e-137	6.0875e-135	ULBP2	1.47044	0.163515	8.99273	2.41161e-19	2.72488e-18
PRG4	-3.54356	0.199708	-17.7437	1.92735e-70	7.99159e-69	ULBP3	2.01001	0.178641	11.2517	2.2726e-29	5.03502e-28
PLA2G4A	-1.42369	0.158857	-8.9621	3.18548e-19	2.08089e-18	TTLL9	-1.99017	0.149814	-13.2843	2.85647e-40	1.21321e-38
WLS	-1.34113	0.117828	-11.3821	5.1332e-30	5.49409e-29	BPIFA2	-1.87845	0.436334	-4.30508	1.66927e-05	5.25425e-05
RGS2	-2.01194	0.141438	-14.2249	6.42286e-46	1.26022e-44	ARHGEF9	1.06326	0.0670024	15.869	1.03961e-56	1.09195e-54
RPE65	-2.93224	0.231976	-12.6402	1.2666e-36	1.76855e-35	PYY	-3.82907	0.226461	-16.9083	3.90686e-64	5.99352e-62
AMPD1	-1.98368	0.192608	-10.2991	7.11586e-25	6.04725e-24	CCL25	1.51116	0.190711	7.92383	2.30309e-15	1.92509e-14
AGMAT	1.46594	0.0942347	15.5562	1.44324e-54	3.73976e-53	SH3BGRL	-1.63294	0.113433	-14.3957	5.50672e-47	3.42014e-45
CD2	1.07347	0.14529	7.38847	1.48524e-13	7.19971e-13	SLC34A1	1.26994	0.205729	6.17289	6.70514e-10	3.444e-09
NR5A2	-1.33696	0.110687	-12.0787	1.36784e-33	1.69347e-32	IDO1	2.8013	0.188348	14.873	4.93473e-50	3.66383e-48
TMEM9	1.11711	0.0654466	17.069	2.526e-65	9.03759e-64	G6PC	1.05653	0.310991	3.39729	0.000680569	0.00169631
BMP8B	1.0709	0.12698	8.43365	3.35056e-17	1.97943e-16	ANO1	-1.13844	0.127768	-8.91018	5.09502e-19	5.63897e-18
ZP4	4.13353	0.433652	9.53191	1.54419e-21	1.13053e-20	BARX1	3.44013	0.243699	14.1163	3.01517e-45	1.68735e-43
KMO	1.77359	0.159158	11.1435	7.70045e-29	7.82683e-28	CA6	5.35861	0.313547	17.0903	1.75309e-65	2.84182e-63
RIMS3	-1.44119	0.115957	-12.4286	1.82743e-35	2.43983e-34	KRT34	3.5559	0.37504	9.4814	2.50891e-21	3.23378e-20
ADGRL2	-1.11837	0.112299	-9.95892	2.30558e-23	1.83981e-22	KRT33B	2.12422	0.400916	5.29841	1.16818e-07	4.75037e-07
MFAP2	2.32764	0.108098	21.5327	7.6904e-103	8.0261e-101	STARD3	-1.36955	0.141366	-9.68799	3.39142e-22	4.68147e-21
KDM5B	1.02728	0.0629608	16.3163	7.56296e-60	2.29424e-58	RARA	-1.6959	0.0937166	-18.096	3.42558e-73	8.12631e-71
ACTL8	7.00254	0.343578	20.3812	2.45316e-92	1.94398e-90	KHDRBS3	1.76908	0.113377	15.6035	6.88675e-55	6.57975e-53
RGS4	1.75803	0.131734	13.3453	1.26149e-40	2.01821e-39	FMO5	-1.474	0.15878	-9.28327	1.64349e-20	2.01068e-19
SSX2IP	1.25285	0.0669721	18.7071	4.33384e-78	2.28585e-76	RAI2	-1.84158	0.14373	-12.8128	1.38992e-37	4.9995e-36
PLA2G2D	1.79007	0.225982	7.92129	2.35068e-15	1.26293e-14	MCCC2	-1.33543	0.097774	-13.6584	1.79978e-42	8.64873e-41
KIF17	-1.03887	0.0869258	-11.9512	6.39602e-33	7.72943e-32	KRT17P1	2.45034	0.243922	10.0456	9.60732e-24	1.47946e-22
GPR89A	1.01338	0.0596346	16.9931	9.23362e-65	3.23982e-63	LIN28A	-3.62685	0.398989	-9.09011	9.89384e-20	1.14613e-18
GALE	1.60734	0.0873238	18.4066	1.16238e-75	5.75929e-74	LRRC9	-1.40348	0.243995	-5.75208	8.81517e-09	4.03246e-08
CR2	1.52314	0.268709	5.66835	1.44176e-08	5.02102e-08	ABHD12B	-2.56414	0.225594	-11.3662	6.1627e-30	1.40902e-28
SLC2A1	1.4656	0.101877	14.386	6.33819e-47	1.28684e-45	RTBDN	-1.59858	0.26337	-6.0697	1.28153e-09	6.41173e-09
CDC20	3.52387	0.131541	26.7891	4.3302e-158	1.5064e-155	MATN3	-1.8926	0.141751	-13.3516	1.15891e-40	5.02308e-39
MPL	-1.18604	0.0917789	-12.9228	3.34818e-38	4.93346e-37	SLC6A11	2.07292	0.250634	8.27069	1.33184e-16	1.22995e-15
ARTN	3.16289	0.155872	20.2916	1.52523e-91	1.19133e-89	FCRLA	1.435	0.208104	6.89558	5.3647e-12	3.3581e-11
ATP6V0B	1.33632	0.065396	20.4343	8.27969e-93	6.67986e-91	LINC00470	-1.16073	0.374757	-3.09729	0.00195302	0.00451348
PTCH2	-1.26461	0.110638	-11.4301	2.95692e-30	3.19336e-29	HHLA1	1.22997	0.351043	3.50375	0.000458755	0.00117487
TSPAN1	2.39831	0.179266	13.3785	8.07459e-41	1.30202e-39	RAMP1	-2.12949	0.177187	-12.0183	2.84774e-33	7.94541e-32
MROH9	1.19134	0.25642	4.64606	3.38328e-06	9.61622e-06	POPDC3	1.31256	0.234112	5.60653	2.06429e-08	9.09068e-08
F3	-1.71661	0.132989	-12.9079	4.06027e-38	5.97194e-37	DDC	2.45187	0.300686	8.15425	3.51361e-16	3.13696e-15
TNFSF4	1.85513	0.105094	17.6521	9.80579e-70	3.97844e-68	FTHL17	5.41967	0.929658	5.82974	5.55136e-09	2.59136e-08
DARS2	1.0054	0.0686891	14.6369	1.63321e-48	3.48617e-47	TRIM47	1.13903	0.0960559	11.858	1.9551e-32	5.20693e-31
HSD11B1	-2.3497	0.165998	-14.155	1.7387e-45	3.34853e-44	GUCY2D	-1.09796	0.170164	-6.45233	1.10141e-10	6.10192e-10
PLPPR5	3.13523	0.209786	14.9449	1.68107e-50	3.83356e-49	RGS22	-4.34521	0.202126	-21.4975	1.6415e-102	1.5966e-99
PLPPR4	-1.14893	0.10363	-11.0869	1.45229e-28	1.46128e-27	SNAP25	-1.15164	0.199541	-5.77141	7.8609e-09	3.61224e-08
SERPINC1	1.35192	0.143124	9.4458	3.52703e-21	2.53528e-20	RHBG	-1.21276	0.185958	-6.5217	6.95149e-11	3.92908e-10
STMN1	1.77324	0.0994694	17.827	4.35919e-71	1.84334e-69	ATP1A4	-2.89636	0.202892	-14.2753	3.11843e-46	1.86305e-44
NEK2	4.25606	0.113268	37.575	0	0	NES	1.53013	0.104002	14.7125	5.36082e-49	3.73498e-47
PROX1	-2.24431	0.160704	-13.9655	2.53134e-44	4.67711e-43	BCAN	1.10993	0.192963	5.75204	8.8174e-09	4.0331e-08
CENPF	3.27538	0.112176	29.1987	2.0167e-187	1.5702e-184	HAPLN2	-1.18912	0.198682	-5.98506	2.16314e-09	1.0564e-08
CD3EAP	1.12326	0.064978	17.2868	5.91724e-67	2.20892e-65	FCRL2	1.6577	0.22509	7.36462	1.77652e-13	1.27237e-12
CHRNB4	1.52235	0.216723	7.02441	2.14969e-12	9.74733e-12	TESMIN	-1.17874	0.107626	-10.9522	6.48461e-28	1.31671e-26
MUC5B	2.87071	0.245417	11.6973	1.31626e-31	1.49873e-30	RBM38	1.29062	0.0964783	13.3773	8.20291e-41	3.597e-39
CTSD	1.31761	0.105411	12.4997	7.49057e-36	1.0164e-34	KANK4	2.1695	0.168058	12.9093	3.99121e-38	1.48278e-36
A4GNT	-1.33251	0.163893	-8.13038	4.27939e-16	2.39446e-15	SYT4	-1.93893	0.485805	-3.99117	6.57477e-05	0.000190695
TREH	-1.63663	0.145691	-11.2336	2.78972e-29	2.8833e-28	SLC14A2	-2.22323	0.19768	-11.2466	2.40786e-29	5.32741e-28
MMP8	1.28156	0.264734	4.84093	1.29234e-06	3.82086e-06	NMUR2	-1.2818	0.23627	-5.42512	5.79146e-08	2.433e-07
APOA1	2.39198	0.212951	11.2325	2.82276e-29	2.91683e-28	PDE6A	1.60388	0.146744	10.9298	8.30227e-28	1.67114e-26
SLC8A2	2.31787	0.217536	10.6551	1.65044e-26	1.50842e-25	ATP8A2	-1.56358	0.201483	-7.76037	8.46798e-15	6.76864e-14
KIF14	3.51652	0.130235	27.0014	1.4236e-160	5.3714e-158	TPTE2	1.13236	0.191423	5.91547	3.30921e-09	1.58552e-08
TTR	1.24786	0.27989	4.4584	8.25742e-06	2.26559e-05	GPR12	3.94157	0.300042	13.1367	2.02838e-39	8.1793e-38
B4GALT6	-1.19463	0.0925622	-12.9063	4.1484e-38	6.09791e-37	CHRM3	3.15413	0.204062	15.4567	6.799e-54	6.18023e-52
CA14	1.03933	0.132978	7.81585	5.45929e-15	2.87822e-14	CHI3L1	2.50657	0.199525	12.5627	3.38746e-36	1.11308e-34
USP35	1.03232	0.109549	9.42334	4.36956e-21	3.12625e-20	LGR6	2.24329	0.215397	10.4147	2.12567e-25	3.67093e-24
FILIP1	-1.61627	0.105088	-15.3801	2.22759e-53	5.52414e-52	TMCC2	2.66761	0.136506	19.542	4.82197e-85	1.98726e-82
CNR1	-1.17717	0.199123	-5.91179	3.3842e-09	1.23752e-08	DCLK1	-1.75999	0.16915	-10.4049	2.35557e-25	4.055e-24
ADGB	1.75721	0.246313	7.13407	9.74431e-13	4.50837e-12	CCNA1	1.54506	0.170181	9.07892	1.09657e-19	1.26789e-18
PLAGL1	-1.67211	0.115652	-14.4581	2.22776e-47	4.60303e-46	POSTN	-1.11068	0.122847	-9.04116	1.5502e-19	1.77885e-18
MYB	1.01909	0.127501	7.99284	1.3186e-15	7.18188e-15	TCEAL4	-1.1699	0.0999975	-11.6992	1.28596e-31	3.23693e-30
SGK1	-1.42024	0.0947218	-14.9938	8.05951e-51	1.85865e-49	BEX1	-4.5547	0.326522	-13.9491	3.18411e-44	1.70912e-42
TCF21	-2.1279	0.214747	-9.90887	3.80928e-23	3.00648e-22	LGALS12	-1.03521	0.22368	-4.62809	3.69046e-06	1.2613e-05
SLC16A7	-3.36072	0.12228	-27.4839	2.7357e-166	1.2089e-163	MYO18B	-1.61917	0.212303	-7.62668	2.40873e-14	1.86053e-13
VAMP8	1.06999	0.0664447	16.1035	2.40991e-58	6.99059e-57	GGT2	1.40257	0.222198	6.31225	2.75003e-10	1.46673e-09
GHRH	2.0014	0.338247	5.91698	3.27914e-09	1.20045e-08	SEC14L4	2.65324	0.279775	9.48346	2.45993e-21	3.17233e-20
CASQ2	-3.41106	0.159639	-21.3673	2.6907e-101	2.6935e-99	ACTR3B	1.46752	0.0941972	15.5793	1.00674e-54	9.58098e-53
OLFM3	3.10713	0.47021	6.60795	3.89666e-11	1.62935e-10	NTS	-1.70492	0.383986	-4.44007	8.99296e-06	2.93023e-05
PKD2	-1.44427	0.0747106	-19.3316	2.91425e-83	1.79135e-81	SPINK5	1.58515	0.213124	7.4377	1.02452e-13	7.49227e-13
ABCG2	-1.4277	0.117983	-12.1009	1.04499e-33	1.29934e-32	TEX15	3.99484	0.393468	10.1529	3.21621e-24	5.11136e-23
SPP1	2.25932	0.15744	14.3503	1.06011e-46	2.13379e-45	GSC	-1.33606	0.159889	-8.35617	6.47851e-17	6.13427e-16
STBD1	-1.86135	0.0858876	-21.672	3.7706e-104	4.065e-102	VRTN	6.30925	0.357688	17.639	1.23683e-69	2.43514e-67
PPL	-1.21899	0.0919346	-13.2593	3.98388e-40	6.27343e-39	PEBP4	-2.90166	0.233679	-12.4173	2.10582e-35	6.61552e-34
PCDH17	1.34858	0.0854027	15.7909	3.59641e-56	9.82793e-55	ADAMDEC1	1.20979	0.191899	6.30429	2.89512e-10	1.54091e-09
TRPM6	-1.70537	0.176939	-9.6382	5.51472e-22	4.1236e-21	BHLHE40	-1.22091	0.0866291	-14.0935	4.1646e-45	2.30934e-43
GDA	-1.46369	0.274644	-5.32942	9.85286e-08	3.19623e-07	GSTM1	-1.00304	0.307562	-3.26127	0.00110914	0.00266864
KLF9	-1.71443	0.0821173	-20.8778	8.52359e-97	7.64349e-95	REG4	-1.05195	0.25324	-4.15399	3.26733e-05	9.87776e-05
C2orf40	-2.99377	0.218044	-13.7301	6.70354e-43	1.17102e-41	GSTM3	-2.6044	0.155041	-16.7981	2.51796e-63	3.68829e-61
ITGB1BP1	-1.32072	0.0593735	-22.2443	1.2802e-109	1.566e-107	VAV3	-2.06579	0.115972	-17.8128	5.62329e-71	1.19418e-68
CTNNAL1	-1.04741	0.0779307	-13.4402	3.51285e-41	5.73037e-40	CHIA	3.44046	0.353865	9.72252	2.41726e-22	3.37024e-21
WDR34	1.5638	0.0786073	19.8938	4.60257e-88	3.30066e-86	PSRC1	1.02263	0.0905803	11.2897	1.47513e-29	3.3028e-28
NR4A3	-2.04278	0.162273	-12.5885	2.44219e-36	3.3669e-35	HMGCS2	-3.07523	0.311991	-9.85678	6.40741e-23	9.24899e-22
CSF3R	1.03983	0.131302	7.91939	2.38687e-15	1.28195e-14	GRHL1	1.0954	0.0957759	11.4371	2.72816e-30	6.35619e-29
ONECUT2	3.34725	0.244283	13.7023	9.83522e-43	1.70774e-41	LPIN1	1.69177	0.0890305	19.0021	1.63833e-80	5.34724e-78
GPR68	1.74211	0.0920059	18.9348	5.89642e-80	3.29796e-78	SAA2	1.77116	0.217258	8.15233	3.56977e-16	3.18418e-15
RHOQ	-1.54303	0.0662759	-23.282	6.749e-120	1.051e-117	ANO3	-1.3053	0.263835	-4.94742	7.52051e-07	2.79013e-06
GPR75	-1.21	0.102782	-11.7725	5.408e-32	6.27569e-31	IL6ST	-2.38364	0.119755	-19.9042	3.74061e-88	1.78343e-85
KLHL29	-2.50731	0.118981	-21.0733	1.39942e-98	1.31251e-96	ERN2	1.77705	0.254786	6.97467	3.06594e-12	1.96702e-11
CNRIP1	-1.78043	0.0842492	-21.1329	3.9619e-99	3.76629e-97	RAX	3.26344	0.307872	10.6	2.97989e-26	5.44384e-25
EPCAM	1.41232	0.0911736	15.4905	4.02179e-54	1.02428e-52	GRP	-1.32561	0.184374	-7.18976	6.49045e-13	4.41574e-12
OGFRL1	-1.00874	0.0976829	-10.3266	5.34031e-25	4.56125e-24	IL2RA	1.91261	0.148447	12.8841	5.53254e-38	2.03366e-36
TECTB	-2.18559	0.351641	-6.2154	5.11953e-10	1.98407e-09	RERG	-1.79812	0.141749	-12.6853	7.1368e-37	2.46323e-35
ELOVL3	-1.83513	0.169065	-10.8546	1.89667e-27	1.80862e-26	SLCO1B1	2.09062	0.501443	4.1692	3.05666e-05	9.28357e-05
NKX2-3	3.70757	0.434567	8.53166	1.44266e-17	8.67432e-17	KLRD1	1.14859	0.135649	8.46736	2.51024e-17	2.45428e-16
IFIT2	1.0636	0.129869	8.1898	2.61655e-16	1.48207e-15	KLRC1	1.08725	0.17258	6.29999	2.9767e-10	1.58173e-09
GPAM	-4.40749	0.1082	-40.7346	0	0	SPX	1.46606	0.235135	6.23499	4.5181e-10	2.36181e-09
PYROXD2	-1.19089	0.0939797	-12.6717	8.4811e-37	1.191e-35	MYBPC3	1.03386	0.159299	6.49003	8.58182e-11	4.81364e-10
HELLS	1.73956	0.0903424	19.2552	1.27594e-82	7.68888e-81	SOX3	-1.49148	0.4387	-3.39976	0.000674454	0.00168219
AVPI1	-1.17411	0.0898319	-13.0701	4.87872e-39	7.40214e-38	PIWIL4	1.322	0.105023	12.5877	2.46711e-36	8.18963e-35
KCNIP2	-5.08442	0.162237	-31.3394	1.3552e-215	2.5567e-212	CDCA8	1.43128	0.102809	13.9216	4.68122e-44	2.47718e-42
C10orf95	1.18874	0.093892	12.6607	9.76561e-37	1.36864e-35	DSC2	2.1906	0.129931	16.8597	8.91071e-64	1.34577e-61
HOXB5	1.79633	0.206894	8.68233	3.87735e-18	2.39566e-17	DSG3	2.65929	0.286382	9.28584	1.60439e-20	1.96432e-19
HOXB1	2.04874	0.256419	7.98982	1.35134e-15	7.35449e-15	ELP2	-1.52883	0.115305	-13.2589	4.00467e-40	1.68762e-38
DUSP1	-1.99221	0.125041	-15.9325	3.77145e-57	1.05713e-55	DSG1	4.34335	0.300716	14.4433	2.76107e-47	1.76212e-45
TEK	-1.83799	0.0977999	-18.7934	8.55767e-79	4.62813e-77	DSC3	2.19017	0.236358	9.26633	1.9266e-20	2.34641e-19
EQTN	-1.56722	0.209552	-7.47888	7.49595e-14	3.69948e-13	SLC43A3	2.0752	0.0971819	21.3538	3.5965e-101	3.30003e-98
MOB3B	-1.3923	0.115695	-12.0343	2.34653e-33	2.87683e-32	GIF	-1.58989	0.456561	-3.48232	0.000497083	0.00126643
INSL4	1.18837	0.410179	2.89721	0.00376502	0.00758509	TCN1	-1.39309	0.28634	-4.86516	1.14364e-06	4.15514e-06
IFNA8	-1.51202	0.664098	-2.2768	0.0227981	0.0408345	C5AR2	-3.29146	0.123627	-26.6241	3.5718e-156	2.4815e-152
GRIA2	3.06126	0.319373	9.58522	9.22606e-22	6.81972e-21	CLDN10	4.5812	0.252115	18.1711	8.74151e-74	2.11497e-71
MYCT1	-1.94284	0.088788	-21.8817	3.8787e-106	4.3537e-104	DZIP1	1.3635	0.097094	14.043	8.49908e-45	4.65974e-43
ARAP3	-1.22541	0.0718325	-17.0593	2.98175e-65	1.06217e-63	ACRV1	1.36078	0.125799	10.8171	2.85757e-27	5.54757e-26
CENPL	1.37696	0.0712023	19.3387	2.53681e-83	1.56522e-81	C9orf40	1.17663	0.079918	14.723	4.58923e-49	3.20659e-47
GPR31	1.11635	0.153741	7.26127	3.8346e-13	1.81174e-12	PSAT1	2.73476	0.199182	13.73	6.71752e-43	3.31655e-41
TP53AIP1	-2.2855	0.165691	-13.7937	2.77996e-43	4.93353e-42	HNF1A	-2.19378	0.247901	-8.84942	8.79791e-19	9.59308e-18
TEX11	1.43991	0.134984	10.6673	1.44783e-26	1.32696e-25	TBX3	-1.77486	0.125818	-14.1066	3.45911e-45	1.92913e-43
LYZL1	1.91713	0.355598	5.39129	6.99521e-08	2.29856e-07	HRK	2.41847	0.21671	11.1599	6.40629e-29	1.37852e-27
IQSEC3	-2.20517	0.133462	-16.5228	2.51277e-61	7.9061e-60	CD36	-1.2335	0.189057	-6.52449	6.82332e-11	3.85932e-10
SPART-AS1	-1.2058	0.12251	-9.84248	7.3869e-23	5.7378e-22	CSN2	-3.11646	0.981678	-3.17463	0.0015003	0.00353322
SMAD9	-1.42913	0.0922281	-15.4956	3.71531e-54	9.48196e-53	KHDC1	1.02259	0.1329	7.69437	1.42191e-14	1.11704e-13
EGR1	-2.68293	0.142863	-18.7798	1.10593e-78	5.94823e-77	MRAP2	1.45506	0.197008	7.38577	1.51569e-13	1.09135e-12
SOCS2	-1.22828	0.139576	-8.80008	1.36715e-18	8.63639e-18	EPHA7	2.96259	0.210298	14.0876	4.52773e-45	2.50498e-43
CHRNA2	-1.62622	0.331634	-4.90366	9.40687e-07	2.81666e-06	CGA	-7.91299	0.390036	-20.2878	1.64719e-91	9.42406e-89
ADRA1A	-4.51244	0.188666	-23.9176	2.0102e-126	3.7924e-124	ELF5	3.30775	0.237973	13.8997	6.36385e-44	3.33492e-42
TNFRSF8	-1.23423	0.124346	-9.92579	3.21539e-23	2.54965e-22	AMHR2	-1.54191	0.185078	-8.33115	8.00617e-17	7.50912e-16
TEX14	1.64622	0.173129	9.50863	1.93181e-21	1.40676e-20	LACRT	-4.56106	0.540649	-8.43627	3.27621e-17	3.17065e-16
NCAPH	2.79305	0.108182	25.818	5.5705e-147	1.5265e-144	GLS2	-1.44001	0.116353	-12.3763	3.51316e-35	1.09448e-33
MND1	2.68756	0.123513	21.7594	5.6325e-105	6.2087e-103	KRT85	2.07689	0.284794	7.2926	3.04023e-13	2.13254e-12
PRB2	1.55795	0.398897	3.90564	9.39744e-05	0.000230413	PPP1R1A	1.24398	0.210884	5.89888	3.65972e-09	1.74349e-08
IAPP	2.13041	0.771317	2.76204	0.00574418	0.01128	B4GALNT1	1.08965	0.15279	7.13166	9.9162e-13	6.64419e-12
KCNJ8	-1.07996	0.111483	-9.68722	3.41719e-22	2.57441e-21	FAIM2	-1.00673	0.209585	-4.80346	1.55947e-06	5.57225e-06
PDZRN3	-1.08404	0.104188	-10.4047	2.36087e-25	2.04893e-24	KRT87P	1.68004	0.168479	9.9718	2.02523e-23	3.03791e-22
RGSL1	1.13645	0.307257	3.69871	0.000216701	0.000510646	KRT7	1.20169	0.17132	7.01433	2.31059e-12	1.50042e-11
CD80	2.26809	0.125418	18.0843	4.23984e-73	1.91857e-71	NHSL1	1.07079	0.0932879	11.4784	1.6945e-30	3.98835e-29
KIF18A	2.42903	0.107137	22.6722	8.4288e-114	1.1359e-111	PKIB	-1.43739	0.152221	-9.44279	3.6298e-21	4.63918e-20
CRY2	-1.19395	0.0621572	-19.2086	3.1379e-82	1.86119e-80	EMX1	-3.27217	0.244097	-13.4052	5.63598e-41	2.48715e-39
DEPDC7	1.10383	0.110114	10.0244	1.19024e-23	9.59467e-23	BCO1	1.44023	0.175167	8.22201	2.00113e-16	1.82176e-15
CAT	-2.01542	0.0679055	-29.6798	1.3991e-193	1.3198e-190	ZNF670-ZNF695	1.38757	0.118732	11.6865	1.49408e-31	3.74721e-30
GJB6	1.0437	0.290664	3.59075	0.000329733	0.000759204	CAPN9	-2.39085	0.172046	-13.8966	6.64504e-44	3.47852e-42
GJA3	2.25088	0.178423	12.6155	1.73524e-36	2.4092e-35	GLUL	-1.07723	0.0885918	-12.1595	5.10984e-34	1.49787e-32
ADGRB2	1.91856	0.143531	13.3669	9.44262e-41	1.51912e-39	RGS8	-1.03797	0.179387	-5.78621	7.1992e-09	3.32136e-08
HCRTR1	-1.58757	0.130549	-12.1607	5.0342e-34	6.33011e-33	GPR55	2.42908	0.163244	14.8801	4.44094e-50	3.30225e-48
GHSR	1.26736	0.4286	2.95696	0.00310684	0.00633244	PAX3	1.134	0.22115	5.12773	2.93263e-07	1.1413e-06
SLITRK3	-1.14487	0.265385	-4.31397	1.60346e-05	4.27926e-05	TTLL4	1.75376	0.0783978	22.37	7.7091e-111	1.1361e-107
CPXM2	-1.33868	0.114351	-11.7067	1.1774e-31	1.34405e-30	ITM2C	1.32781	0.107369	12.3668	3.953e-35	1.22836e-33
TMEM54	1.26935	0.082837	15.3234	5.33227e-53	1.30648e-51	SERPINE2	1.5235	0.120378	12.656	1.03624e-36	3.54137e-35
CSMD2	2.06195	0.135818	15.1817	4.67401e-52	1.11839e-50	WNT10A	2.09204	0.166846	12.5387	4.5849e-36	1.49643e-34
GPSM2	1.23622	0.0877718	14.0845	4.73057e-45	8.99743e-44	EDAR	2.68211	0.247002	10.8587	1.81403e-27	3.57593e-26
CXCR4	1.15768	0.10301	11.2386	2.63527e-29	2.72885e-28	ARHGEF4	1.88049	0.14021	13.4119	5.14779e-41	2.27998e-39
SV2C	-1.09234	0.158639	-6.88566	5.75213e-12	2.54009e-11	PCDH8	3.47174	0.28253	12.288	1.0502e-34	3.19602e-33
FLT3	1.27893	0.185252	6.90373	5.06553e-12	2.24295e-11	CNMD	2.03621	0.270599	7.52482	5.27941e-14	3.95537e-13
RASL11A	-1.02557	0.114528	-8.95474	3.40534e-19	2.21949e-18	SCEL	2.37713	0.368428	6.4521	1.10311e-10	6.10992e-10
LINC00544	1.00644	0.231491	4.34764	1.37611e-05	3.69423e-05	IGF2BP3	3.00552	0.23159	12.9778	1.63575e-38	6.21468e-37
XPNPEP2	-2.89453	0.158866	-18.22	3.58351e-74	1.67408e-72	MMD2	1.77149	0.45232	3.91644	8.98645e-05	0.000255582
PAEP	1.24574	0.245576	5.07274	3.92127e-07	1.21362e-06	NKX2-1	2.73623	0.604598	4.52571	6.0193e-06	2.00359e-05
OBP2A	1.84942	0.225389	8.20546	2.29702e-16	1.30454e-15	CIB2	1.44931	0.128504	11.2783	1.68056e-29	3.75412e-28
FMOD	-1.17119	0.134639	-8.6987	3.35702e-18	2.08099e-17	MYCBPAP	-1.28668	0.13871	-9.27606	1.7586e-20	2.14718e-19
MYOG	2.84304	0.330058	8.61376	7.07027e-18	4.31948e-17	CHAD	-4.67126	0.213447	-21.8848	3.6242e-106	4.2988e-103
PLG	1.3433	0.334478	4.01611	5.91664e-05	0.000148558	GH2	1.42552	0.614071	2.32143	0.0202639	0.0389015
LDB3	-1.60722	0.105682	-15.2081	3.12666e-52	7.52917e-51	LIMD2	1.03218	0.127813	8.07573	6.70753e-16	5.85627e-15
OPN4	-1.58536	0.174179	-9.10191	8.87586e-20	5.96981e-19	RTP4	1.32681	0.134857	9.8387	7.66983e-23	1.10027e-21
PRXL2A	-1.18788	0.0821839	-14.4539	2.36738e-47	4.88947e-46	SCN2A	1.01441	0.201106	5.04415	4.55549e-07	1.73253e-06
PTGFR	-2.12602	0.177031	-12.0093	3.17378e-33	3.87072e-32	TBR1	2.43421	0.294247	8.27268	1.30979e-16	1.21027e-15
EEPD1	-1.70239	0.0761042	-22.3692	7.8473e-111	9.9464e-109	GALNT5	-2.17631	0.178276	-12.2075	2.83474e-34	8.42126e-33
NXPH1	3.8961	0.372209	10.4675	1.21818e-25	1.07472e-24	SCN7A	-1.99175	0.19975	-9.97118	2.03785e-23	3.05496e-22
NPY	1.21388	0.431077	2.81593	0.00486363	0.00965054	BLK	1.3826	0.231827	5.96395	2.46219e-09	1.19547e-08
FAM126A	-1.8948	0.0978305	-19.3682	1.43172e-83	8.91229e-82	GATA4	-3.41182	0.397318	-8.58712	8.91783e-18	8.98453e-17
HOXA7	-1.9239	0.166949	-11.5239	1.00027e-30	1.10036e-29	KCTD3	-1.2344	0.0792825	-15.5697	1.16961e-54	1.11092e-52
INHBA	3.39536	0.115017	29.5206	1.5654e-191	1.3712e-188	IL36G	1.57015	0.308496	5.08971	3.58617e-07	1.3804e-06
ARL4A	-1.54308	0.0948936	-16.2612	1.86206e-59	5.583e-58	IL36RN	2.64787	0.342791	7.72445	1.12339e-14	8.88465e-14
TWIST1	-1.20972	0.131576	-9.19408	3.78206e-20	2.5885e-19	IL36B	1.57549	0.426227	3.69635	0.000218718	0.000588755
RECK	-1.73398	0.0931442	-18.6161	2.38131e-77	1.23085e-75	CFC1	-1.76864	0.665942	-2.65585	0.00791091	0.0164324
SPINK4	3.67901	0.277053	13.2791	3.06123e-40	4.84542e-39	BIN1	1.21536	0.110345	11.0142	3.26552e-28	6.75481e-27
ACO1	-2.00994	0.0724822	-27.7301	3.0292e-169	1.3887e-166	DNAJC1	-1.00967	0.112761	-8.95405	3.4268e-19	3.83012e-18
DNAI1	1.30728	0.171289	7.63204	2.31068e-14	1.17503e-13	TMOD1	1.95154	0.146094	13.3581	1.06295e-40	4.61953e-39
DCAF10	1.06972	0.0956308	11.186	4.77589e-29	4.89791e-28	KIF12	-2.68857	0.160123	-16.7906	2.8572e-63	4.16014e-61
CNTFR	-2.62486	0.207744	-12.6351	1.35251e-36	1.88529e-35	WDR38	-1.69188	0.240738	-7.02789	2.09673e-12	1.3661e-11
AKR1D1	-1.03017	0.253885	-4.05762	4.95744e-05	0.000125638	GABBR2	3.03117	0.332131	9.12644	7.07878e-20	8.28117e-19
SFTPA1	-1.67712	0.404953	-4.14153	3.45e-05	8.8867e-05	CTSV	2.36813	0.144411	16.3985	1.95946e-60	2.488e-58
NEUROG3	1.4234	0.309698	4.59608	4.30514e-06	1.21108e-05	LMX1B	-1.9873	0.1106	-17.9683	3.44964e-72	7.76663e-70
PLAU	1.33268	0.11107	11.9986	3.61282e-33	4.40069e-32	POLR1E	1.00485	0.0631479	15.9127	5.17721e-57	5.5579e-55
CHST3	-1.24401	0.11474	-10.842	2.17594e-27	2.06889e-26	CCL21	1.21184	0.224424	5.39975	6.67341e-08	2.78547e-07
ARL4AP1	2.14719	0.565618	3.79618	0.00014694	0.0003528	DMRT1	3.45376	0.350906	9.84241	7.39151e-23	1.06128e-21
EGR2	-2.19523	0.128547	-17.0772	2.19223e-65	7.84914e-64	PIM1	1.36199	0.0944214	14.4246	3.62285e-47	2.28512e-45
ZWINT	2.57895	0.0926401	27.8384	1.4901e-170	7.1659e-168	TINAG	1.9733	0.688341	2.86675	0.00414708	0.00905557
CIT	1.9751	0.0883457	22.3565	1.0449e-110	1.3176e-108	HCRTR2	1.93736	0.402895	4.80859	1.52001e-06	5.43846e-06
ACADS	-1.36784	0.105598	-12.9532	2.25249e-38	3.33805e-37	IRF4	1.32652	0.1765	7.51568	5.6616e-14	4.22738e-13
CDKN2C	-1.34144	0.0953866	-14.0632	6.39373e-45	1.20904e-43	GCM1	-1.64102	0.216433	-7.58213	3.39921e-14	2.5898e-13
BHLHE41	-1.13907	0.111323	-10.2321	1.42382e-24	1.19305e-23	TUBB2B	2.27658	0.200676	11.3446	7.88997e-30	1.79549e-28
SSPN	-1.62146	0.0925137	-17.5267	8.96205e-69	3.51967e-67	HMGA1	1.4392	0.0905851	15.8879	7.69082e-57	8.13994e-55
NECAB1	-1.89229	0.153232	-12.3492	4.91761e-35	6.45142e-34	CLPS	1.22621	0.229827	5.33535	9.53611e-08	3.90856e-07
DDX39A	1.50396	0.079513	18.9146	8.65146e-80	4.80058e-78	FGFBP1	2.74626	0.37291	7.3644	1.77948e-13	1.2743e-12
GIPC1	1.01869	0.0756376	13.4681	2.41052e-41	3.95587e-40	FGFBP2	3.24623	0.228661	14.1967	9.5983e-46	5.53707e-44
CCDC70	1.21498	0.27724	4.38241	1.17373e-05	3.1728e-05	CPEB2	-1.5506	0.0968591	-16.0088	1.10943e-57	1.22899e-55
ATP7B	1.07635	0.124405	8.65199	5.06078e-18	3.10924e-17	TTC29	-1.1679	0.247281	-4.72296	2.32442e-06	8.12995e-06
GUCY1B2	2.84005	0.207581	13.6816	1.30751e-42	2.25831e-41	ANKRD42	-1.0384	0.0721116	-14.4	5.17712e-47	3.21954e-45
CENPK	1.88957	0.0912664	20.7039	3.1962e-95	2.73612e-93	SYTL2	-2.28167	0.130265	-17.5156	1.08851e-68	2.01275e-66
ITIH5	-3.95948	0.135246	-29.2762	2.086e-188	1.7054e-185	RAB30	-2.24236	0.128336	-17.4726	2.31678e-68	4.23561e-66
NEUROD4	2.46482	0.845681	2.9146	0.00356144	0.00720099	GGH	1.19418	0.132114	9.03899	1.58125e-19	1.81281e-18
MMP19	-1.20262	0.102447	-11.7389	8.04922e-32	9.27049e-31	SLCO5A1	2.20213	0.156362	14.0835	4.79668e-45	2.65077e-43
NR4A1	-1.86552	0.15204	-12.2699	1.31353e-34	1.69467e-33	MMP7	3.28694	0.194639	16.8873	5.57678e-64	8.5017e-62
PDE1B	-1.76765	0.0977091	-18.091	3.75344e-73	1.70792e-71	MMP20	4.68899	0.302891	15.4808	4.67661e-54	4.27497e-52
HOXC13	2.98644	0.163979	18.2124	4.1175e-74	1.91806e-72	TRIM29	1.95716	0.205697	9.51478	1.82103e-21	2.37613e-20
LRP1	-1.64824	0.0965796	-17.0661	2.65427e-65	9.48267e-64	BTG4	-1.18204	0.304831	-3.8777	0.00010545	0.000296802
HOXC11	3.58685	0.194978	18.3961	1.41062e-75	6.97516e-74	FXYD6	1.31274	0.100336	13.0834	4.09889e-39	1.62323e-37
NFE2	1.3176	0.173092	7.61214	2.69598e-14	1.36474e-13	TMPRSS13	1.13505	0.11854	9.57525	1.01609e-21	1.35528e-20
HOXC12	4.07754	0.279988	14.5633	4.8092e-48	1.01202e-46	CASP5	1.25205	0.154987	8.07841	6.56156e-16	5.73088e-15
STIL	2.10173	0.0988568	21.2604	2.6422e-100	2.60251e-98	ITPKA	-1.2636	0.181468	-6.96321	3.32601e-12	2.12714e-11
HJURP	3.52823	0.116535	30.2761	2.3631e-201	2.7599e-198	DUOX1	1.21057	0.147914	8.1843	2.73882e-16	2.46743e-15
COL10A1	7.12643	0.15441	46.1525	0	0	SLC28A2	-1.58622	0.192942	-8.2212	2.01484e-16	1.83352e-15
PLP1	-1.60207	0.214421	-7.47162	7.92109e-14	3.90027e-13	SEMA6D	-1.24178	0.154435	-8.04082	8.92395e-16	7.71933e-15
ESX1	2.06389	0.649692	3.17672	0.00148952	0.00316348	BCL2L10	1.77954	0.162724	10.9359	7.76414e-28	1.56736e-26
ACVR1C	-5.17997	0.166429	-31.1243	1.1312e-212	1.9133e-209	BRDT	-3.2791	0.261439	-12.5425	4.37144e-36	1.42772e-34
G0S2	-4.03263	0.176404	-22.8601	1.1588e-115	1.6428e-113	LHCGR	-1.00744	0.334011	-3.01619	0.00255969	0.00579303
KCNJ2	-1.33971	0.115583	-11.5909	4.58072e-31	5.11365e-30	CYP1B1	1.48916	0.149651	9.9509	2.49913e-23	3.72008e-22
C4BPA	-2.26488	0.259549	-8.72621	2.63355e-18	1.64123e-17	SLC5A6	1.32677	0.0887549	14.9487	1.58923e-50	1.20759e-48
CKS2	2.65122	0.0949628	27.9185	1.5913e-171	7.8844e-169	SIX3	3.57079	0.267133	13.3671	9.41359e-41	4.10576e-39
DAW1	-1.19642	0.344023	-3.47774	0.000505665	0.00113967	LOXL4	2.31303	0.170134	13.5953	4.26812e-42	2.00544e-40
CHPF	1.38298	0.0793605	17.4266	5.18729e-68	1.9941e-66	DUSP5	-1.19384	0.101443	-11.7685	5.67004e-32	1.46359e-30
INHA	1.78797	0.16822	10.6287	2.19054e-26	1.99203e-25	CEP55	1.29462	0.116286	11.133	8.66529e-29	1.8515e-27
MOGAT1	-2.28135	0.238809	-9.55303	1.25961e-21	9.25641e-21	EXOC6	-1.09394	0.0659258	-16.5935	7.76557e-62	1.05784e-59
FAM124B	-1.24004	0.0976308	-12.7013	5.812e-37	8.19225e-36	GPR87	2.21946	0.218517	10.1569	3.08643e-24	4.91474e-23
WFDC3	1.09993	0.129527	8.49192	2.03252e-17	1.21303e-16	OIT3	1.06569	0.149135	7.1458	8.9472e-13	6.01731e-12
PREX1	1.06297	0.124972	8.50566	1.80563e-17	1.07985e-16	CDK15	-1.04185	0.127677	-8.16004	3.34902e-16	2.99593e-15
KCNS1	-1.16149	0.229756	-5.05531	4.29696e-07	1.32554e-06	SLC40A1	-2.50421	0.164098	-15.2604	1.40278e-52	1.18025e-50
SLC12A5	1.73444	0.152685	11.3596	6.6441e-30	7.07109e-29	APH1B	-1.25184	0.0809763	-15.4593	6.52769e-54	5.94472e-52
SEMG2	2.06453	0.633098	3.26099	0.00111024	0.00239784	CILP	-1.41115	0.162714	-8.67256	4.22497e-18	4.37624e-17
PARD6B	2.19356	0.149909	14.6326	1.73989e-48	3.70904e-47	PCDH10	-2.47099	0.280041	-8.82366	1.10775e-18	1.19661e-17
GTSF1L	2.07785	0.261341	7.95071	1.85438e-15	1.00178e-14	NDST4	-3.33497	0.429936	-7.75691	8.70262e-15	6.94824e-14
EDN3	-2.45947	0.301768	-8.1502	3.63338e-16	2.04128e-15	RASGEF1B	1.26813	0.0877014	14.4596	2.18023e-47	1.40433e-45
PTGIS	-2.01089	0.125666	-16.0019	1.23984e-57	3.5256e-56	IL21	1.19711	0.320236	3.7382	0.000185341	0.000503818
PPP4R1L	-1.25187	0.0945908	-13.2346	5.54136e-40	8.68418e-39	BMPR1B	-4.83944	0.255974	-18.906	1.01767e-79	3.25593e-77
RBPJL	1.21336	0.218283	5.55866	2.71859e-08	9.27089e-08	CCNG2	-1.20072	0.0814986	-14.7331	3.95332e-49	2.77423e-47
C20orf85	4.81645	0.461636	10.4334	1.74462e-25	1.52463e-24	ANXA3	1.10254	0.151245	7.28978	3.10467e-13	2.17524e-12
BCAS4	2.00957	0.109252	18.3938	1.4716e-75	7.26938e-74	PAPSS1	1.27394	0.0638174	19.9622	1.1745e-88	5.88836e-86
KCNK15	2.48959	0.168764	14.7518	2.9936e-49	6.54084e-48	MTTP	1.23492	0.171902	7.18386	6.77706e-13	4.60558e-12
PCK1	-4.87249	0.263679	-18.4788	3.05652e-76	1.53301e-74	FBN2	1.5107	0.167882	8.99859	2.28633e-19	2.58815e-18
ZBP1	1.84468	0.161658	11.411	3.68281e-30	3.96074e-29	PDE6H	1.43476	0.241166	5.94927	2.69337e-09	1.30265e-08
MAGEA10	3.48482	0.576425	6.04557	1.48879e-09	5.57765e-09	ETV6	1.0106	0.0785241	12.8699	6.64823e-38	2.42907e-36
CHST8	1.86469	0.22487	8.29228	1.11102e-16	6.3897e-16	CPNE8	1.07506	0.095917	11.2082	3.71703e-29	8.13148e-28
IL9R	2.17824	0.146541	14.8644	5.61455e-50	1.25871e-48	PIK3C2G	1.07974	0.222221	4.85887	1.1806e-06	4.28026e-06
XG	-1.80213	0.125232	-14.3903	5.95475e-47	1.211e-45	SINHCAF	1.04517	0.100074	10.444	1.56163e-25	2.72394e-24
IL17C	2.60489	0.270115	9.64361	5.23135e-22	3.91649e-21	SLC38A4	-1.06873	0.168053	-6.35949	2.02419e-10	1.09315e-09
HIF3A	-3.70723	0.196996	-18.8188	5.29255e-79	2.88456e-77	AMIGO2	-1.36621	0.152029	-8.9865	2.55221e-19	2.87974e-18
LYPD3	1.06586	0.126632	8.41696	3.86376e-17	2.27548e-16	COL2A1	1.11887	0.334278	3.34713	0.00081652	0.00200932
CEACAM8	-1.18171	0.240398	-4.91564	8.84936e-07	2.6554e-06	LGR5	2.65171	0.200694	13.2127	7.41137e-40	3.08581e-38
NDP	1.85629	0.244385	7.59578	3.05949e-14	1.54381e-13	PTPRQ	-2.00681	0.263998	-7.60159	2.92511e-14	2.24406e-13
F13A1	-1.33737	0.139977	-9.55425	1.2448e-21	9.15305e-21	KERA	-1.71706	0.180997	-9.48668	2.38503e-21	3.07983e-20
GRM4	5.2952	0.209517	25.2733	6.2793e-141	1.5248e-138	SYCP3	-1.13172	0.165077	-6.85571	7.0957e-12	4.38464e-11
TRERF1	1.03551	0.0964284	10.7386	6.70268e-27	6.24463e-26	ASCL1	-5.78794	0.39168	-14.7772	2.05525e-49	1.46124e-47
PACSIN1	2.71079	0.117654	23.0404	1.8368e-117	2.7056e-115	FOXN4	-1.57128	0.275448	-5.70445	1.16717e-08	5.26438e-08
BTN1A1	-1.88103	0.179455	-10.482	1.04564e-25	9.25325e-25	PDX1	3.52666	0.564108	6.25174	4.0591e-10	2.13035e-09
HIST1H1D	2.97228	0.21885	13.5814	5.16641e-42	8.69972e-41	RDH16	-1.5677	0.181177	-8.65287	5.02184e-18	5.18287e-17
HIST1H1A	2.81692	0.452041	6.23156	4.61802e-10	1.79552e-09	CELA1	-1.23934	0.242134	-5.11839	3.08151e-07	1.19599e-06
MOCS1	-2.16664	0.0821252	-26.3822	2.1944e-153	6.8561e-151	MAP3K12	-1.22082	0.082199	-14.8521	6.74619e-50	4.97082e-48
HIST1H2BJ	2.56142	0.154197	16.6114	5.76569e-62	1.8582e-60	GALNT6	-1.88432	0.127584	-14.7693	2.3113e-49	1.63623e-47
OR2B6	4.57175	0.209934	21.7771	3.8256e-105	4.2456e-103	CSAD	-1.30904	0.110709	-11.8241	2.92899e-32	7.70362e-31
SPDEF	1.50918	0.150221	10.0464	9.52702e-24	7.71536e-23	SMIM2	1.23022	0.250928	4.90266	9.45467e-07	3.46567e-06
DNAH8	1.88818	0.190241	9.92521	3.23428e-23	2.5638e-22	MORN3	1.05277	0.12153	8.6626	4.61127e-18	4.76723e-17
TREM1	1.18859	0.147549	8.05558	7.91031e-16	4.36219e-15	DIAPH3	1.02754	0.118315	8.6848	3.79415e-18	3.94006e-17
KLHL31	-3.83711	0.129042	-29.7355	2.6725e-194	2.6218e-191	SLAIN1	1.60071	0.180947	8.84629	9.04751e-19	9.85199e-18
NRN1	-2.25435	0.115454	-19.526	6.60115e-85	4.32309e-83	METTL21C	1.0856	0.316119	3.43415	0.000594425	0.00149563
CRISP1	2.56287	0.376978	6.79847	1.05736e-11	4.59598e-11	ZIC5	1.46917	0.429724	3.41886	0.00062884	0.00157667
RUNX2	1.30992	0.102365	12.7965	1.71472e-37	2.46442e-36	TTC6	-3.35543	0.162203	-20.6866	4.57214e-95	3.08816e-92
RAB17	1.00168	0.105101	9.53065	1.56301e-21	1.1438e-20	REM2	-1.03301	0.12775	-8.08617	6.15687e-16	5.39098e-15
SCGB1D2	1.05909	0.30805	3.43803	0.000585965	0.00131018	NOVA1	-3.56651	0.205827	-17.3277	2.90784e-67	5.0504e-65
SCGB2A1	1.20112	0.258455	4.6473	3.36312e-06	9.56169e-06	MDGA2	2.33019	0.338286	6.88823	5.649e-12	3.52653e-11
AHNAK	-1.48634	0.0833853	-17.8249	4.52792e-71	1.91139e-69	RTN1	-1.52985	0.157382	-9.72061	2.46303e-22	3.4311e-21
MT1G	1.15563	0.194875	5.9301	3.02741e-09	1.1117e-08	SYT16	1.30044	0.251057	5.17987	2.22041e-07	8.74693e-07
PIWIL1	1.04613	0.191492	5.46303	4.68089e-08	1.56312e-07	KCNH5	1.65738	0.368495	4.49771	6.86879e-06	2.27127e-05
GPR18	1.43724	0.160722	8.94242	3.80741e-19	2.47431e-18	STON2	-1.19894	0.130494	-9.18767	4.01437e-20	4.7837e-19
KIF25	-1.96195	0.158947	-12.3434	5.28533e-35	6.92642e-34	AK7	-1.26267	0.132314	-9.54299	1.38772e-21	1.82741e-20
TMEM255A	-2.22629	0.114676	-19.4137	5.91573e-84	3.74424e-82	FAM181A	1.54925	0.292393	5.2985	1.16756e-07	4.74824e-07
MYH2	-1.11854	0.201468	-5.55191	2.8256e-08	9.62242e-08	WARS	1.02245	0.0846222	12.0825	1.3071e-33	3.73477e-32
SLC25A19	1.00897	0.0734486	13.7372	6.08154e-43	1.06312e-41	SLC25A47	1.41835	0.229632	6.17663	6.54858e-10	3.36785e-09
BARHL1	1.14197	0.290022	3.93751	8.23301e-05	0.000203234	DUOXA1	2.04632	0.190635	10.7342	7.03011e-27	1.3308e-25
MBOAT7	1.41345	0.0729672	19.371	1.35596e-83	8.46217e-82	DUOXA2	1.08586	0.233243	4.65546	3.23258e-06	1.11255e-05
SRMS	2.34596	0.135762	17.2799	6.66153e-67	2.47922e-65	DUOX2	1.64262	0.174632	9.40618	5.14483e-21	6.52068e-20
FNDC11	1.12419	0.132573	8.47977	2.25636e-17	1.34336e-16	SLC27A2	-2.77927	0.194542	-14.2862	2.6672e-46	1.59937e-44
PPDPF	1.16052	0.0875978	13.2483	4.61457e-40	7.25726e-39	HDC	-2.33141	0.191192	-12.1941	3.34218e-34	9.8985e-33
IL37	1.36332	0.237888	5.73091	9.98931e-09	3.52135e-08	GCNT3	2.44213	0.216516	11.2792	1.66203e-29	3.71443e-28
C3	-1.05714	0.11973	-8.82944	1.05203e-18	6.67582e-18	BCL2A1	2.59783	0.152852	16.9957	8.83904e-65	1.39562e-62
FOSB	-3.37642	0.195046	-17.3109	3.89382e-67	1.45913e-65	IGF1R	-1.79564	0.136507	-13.1543	1.60826e-39	6.55037e-38
TGM3	2.28407	0.22812	10.0126	1.34164e-23	1.08027e-22	PIF1	1.68643	0.122543	13.7619	4.32032e-43	2.15488e-41
DEFB126	3.35796	0.708619	4.73873	2.1506e-06	6.22955e-06	BBS4	-1.06119	0.0595525	-17.8194	4.99577e-71	1.06557e-68
FOXA2	1.1103	0.412778	2.68983	0.00714882	0.01384	PCSK6	-1.42463	0.158091	-9.01145	2.03348e-19	2.3116e-18
PAX1	3.06664	0.244367	12.5493	4.00951e-36	5.48911e-35	LMAN1L	1.86757	0.32333	5.77605	7.64733e-09	3.51743e-08
NKX2-2	5.70653	0.421838	13.5278	1.07255e-41	1.78282e-40	HAPLN3	2.62497	0.120722	21.744	7.8793e-105	8.7086e-102
CSTL1	3.07977	0.335892	9.16891	4.77828e-20	3.25624e-19	RHCG	2.79246	0.269696	10.3541	4.00939e-25	6.80324e-24
CST11	1.84756	0.410563	4.50006	6.79348e-06	1.87737e-05	RLBP1	4.255	0.32685	13.0182	9.64329e-39	3.71898e-37
SNRPB	1.24936	0.069989	17.8508	2.84968e-71	1.21445e-69	ABHD2	-1.32136	0.114447	-11.5456	7.76889e-31	1.86849e-29
BMP2	-2.27688	0.146279	-15.5653	1.25255e-54	3.25079e-53	WDR93	-1.42076	0.124205	-11.4388	2.67436e-30	6.23476e-29
PCSK2	1.40525	0.344231	4.0823	4.45924e-05	0.000113558	TICRR	1.28374	0.119387	10.7528	5.7513e-27	1.0934e-25
LAMP5	2.91859	0.136526	21.3776	2.1611e-101	2.1767e-99	NTRK3	1.0026	0.203744	4.92088	8.61571e-07	3.17586e-06
TCF15	-1.64305	0.160249	-10.2531	1.14615e-24	9.65336e-24	MFGE8	2.2587	0.107945	20.9245	3.20634e-97	2.32728e-94
OTOR	3.18963	0.262853	12.1347	6.9199e-34	8.65243e-33	SH3GL3	2.4962	0.273997	9.11029	8.21607e-20	9.57479e-19
FAM110A	1.48168	0.0858228	17.2644	8.71362e-67	3.23069e-65	2020-09-12	-1.048	0.179994	-5.82243	5.79977e-09	2.70265e-08
CITED1	-1.77587	0.221606	-8.01363	1.11371e-15	6.09504e-15	ABCC12	-1.01913	0.304151	-3.35072	0.000806008	0.00198516
NECAB3	1.39865	0.0947156	14.7669	2.39537e-49	5.25246e-48	CHST4	3.16646	0.252253	12.5527	3.83993e-36	1.25835e-34
ID1	-1.24127	0.112662	-11.0176	3.14158e-28	3.1075e-27	KIFC3	1.06617	0.0891738	11.9561	6.03435e-33	1.65421e-31
ROMO1	1.14341	0.098404	11.6196	3.27722e-31	3.68364e-30	TLDC1	1.16451	0.0807057	14.4291	3.39571e-47	2.15022e-45
BPIFB1	3.33673	0.246822	13.5188	1.21166e-41	2.01064e-40	MYOCD	-1.03378	0.171023	-6.04471	1.49678e-09	7.44046e-09
GRPR	1.33526	0.237606	5.61964	1.91361e-08	6.60891e-08	CTRL	1.00606	0.165307	6.08601	1.15759e-09	5.81197e-09
F10	-2.51947	0.117653	-21.4144	9.8048e-102	9.9575e-100	TOB1	-1.28095	0.110041	-11.6406	2.56092e-31	6.31222e-30
PROZ	2.06881	0.183171	11.2945	1.39768e-29	1.46431e-28	SPATA22	1.10702	0.202828	5.45791	4.81764e-08	2.04671e-07
SLURP1	2.87782	0.306532	9.38832	6.09664e-21	4.33283e-20	LRRC46	-2.19152	0.120544	-18.1803	7.39677e-74	1.79856e-71
IGFLR1	1.00278	0.088697	11.3057	1.23028e-29	1.29169e-28	RHBDL3	-1.58738	0.189357	-8.383	5.15963e-17	4.92093e-16
GPR42	-1.73254	0.247463	-7.0012	2.53775e-12	1.14519e-11	ARSG	-1.93245	0.0972051	-19.8801	6.05051e-88	2.71231e-85
KIRREL2	1.79837	0.237212	7.5813	3.42108e-14	1.72061e-13	C17orf64	1.40213	0.174949	8.01448	1.106e-15	9.49612e-15
KRT36	1.06325	0.156513	6.79337	1.09541e-11	4.75503e-11	TAF4B	1.46334	0.109172	13.404	5.73194e-41	2.52262e-39
CCR7	1.85091	0.160492	11.5327	9.02513e-31	9.95505e-30	IMPA2	1.63667	0.121816	13.4355	3.74387e-41	1.6765e-39
BCL2L12	1.25671	0.084512	14.8702	5.14903e-50	1.15593e-48	SLC39A6	-3.11899	0.143932	-21.6698	3.9535e-104	4.0907e-101
TSKS	-1.44906	0.156705	-9.24708	2.30704e-20	1.59522e-19	ADCYAP1	1.46495	0.230832	6.34638	2.20443e-10	1.18627e-09
CSN1S1	-3.43088	0.428826	-8.00063	1.23781e-15	6.75535e-15	GATA6	1.30123	0.118164	11.0121	3.34176e-28	6.90956e-27
HTN1	2.91357	0.781231	3.72946	0.00019189	0.000454715	GREB1L	-2.43766	0.16428	-14.8385	8.26102e-50	6.06861e-48
STAT5A	-1.41336	0.0818724	-17.263	8.93927e-67	3.30935e-65	SLC13A5	1.20835	0.192583	6.27442	3.5093e-10	1.85279e-09
WNK4	1.38927	0.203563	6.82474	8.80827e-12	3.84706e-11	CCDC40	-1.4002	0.0968731	-14.454	2.36519e-47	1.51944e-45
PRKCG	1.09328	0.201467	5.42658	5.74429e-08	1.9005e-07	ZNF750	1.20743	0.132041	9.14436	5.99839e-20	7.05802e-19
IFI6	2.88097	0.161033	17.8905	1.39787e-71	6.03065e-70	MAPK4	2.07977	0.308621	6.73892	1.59568e-11	9.5425e-11
SSX1	4.37085	0.701407	6.23155	4.61838e-10	1.79552e-09	TNFRSF11A	1.34679	0.118848	11.332	9.10738e-30	2.06385e-28
CFP	-1.32482	0.132382	-10.0075	1.41258e-23	1.13665e-22	FBXO15	-1.7438	0.127331	-13.695	1.08713e-42	5.26576e-41
TIMM17B	1.17544	0.0715681	16.424	1.28692e-60	3.99278e-59	CBLN2	-5.70083	0.321992	-17.7049	3.84686e-70	7.69862e-68
RHOJ	-1.58026	0.0830622	-19.025	1.05875e-80	6.0529e-79	ERBB2	-2.25001	0.169173	-13.3001	2.3127e-40	9.90914e-39
DLGAP5	3.30111	0.116628	28.3047	3.0272e-176	1.8109e-173	GRB7	-1.43076	0.162493	-8.80503	1.3082e-18	1.40594e-17
CTAG2	3.02403	0.71862	4.20812	2.57509e-05	6.72737e-05	MIEN1	-1.35794	0.151189	-8.98178	2.66414e-19	2.99907e-18
AVPR2	-2.71153	0.146332	-18.53	1.18388e-76	6.02403e-75	PNMT	-2.93841	0.266506	-11.0257	2.87398e-28	5.94997e-27
TMEM35A	-1.62855	0.155795	-10.4532	1.41659e-25	1.24595e-24	STAC2	2.19077	0.287161	7.62906	2.36475e-14	1.82743e-13
FGD3	2.06396	0.141532	14.583	3.60144e-48	7.60799e-47	IGFBP4	-1.24382	0.094297	-13.1905	9.95847e-40	4.10764e-38
EDN2	2.49345	0.167802	14.8595	6.03503e-50	1.35174e-48	CACNA1A	1.31276	0.123315	10.6456	1.82745e-26	3.37527e-25
TRAF2	1.19607	0.0659083	18.1474	1.34534e-73	6.21391e-72	MISP3	-1.04919	0.115362	-9.09472	9.48271e-20	1.10061e-18
MASP1	-3.60381	0.190327	-18.9349	5.88428e-80	3.29493e-78	CIB3	-2.8612	0.180953	-15.8118	2.5804e-56	2.66994e-54
ATP13A4	-1.03498	0.211644	-4.8902	1.00736e-06	3.00656e-06	PGGHG	-1.09264	0.174825	-6.2499	4.10725e-10	2.15469e-09
PTPRB	-1.83913	0.0960067	-19.1563	8.57654e-82	5.03828e-80	DNMT3L	2.4906	0.328212	7.58838	3.23921e-14	2.47254e-13
LRRC61	1.07028	0.0746922	14.3293	1.43647e-46	2.87833e-45	IL19	-2.1706	0.273479	-7.93699	2.07151e-15	1.73749e-14
AUNIP	2.21979	0.107912	20.5703	5.06283e-94	4.2235e-92	SLC6A3	1.08312	0.222305	4.87221	1.10358e-06	4.01859e-06
PLA2G5	-1.38197	0.13329	-10.3681	3.46382e-25	2.98554e-24	NLRP12	-1.27003	0.134888	-9.41545	4.71046e-21	5.98574e-20
KLF2	-1.49464	0.108262	-13.8058	2.35235e-43	4.18373e-42	CACNG8	-1.3417	0.152468	-8.79991	1.36927e-18	1.46866e-17
OR7C1	-1.52145	0.213874	-7.11377	1.12911e-12	5.20294e-12	FBN3	3.32335	0.231289	14.3688	8.12033e-47	5.03057e-45
GFER	1.17577	0.0743762	15.8085	2.7201e-56	7.46233e-55	SLC47A1	-1.04958	0.147209	-7.12985	1.00477e-12	6.72856e-12
SYNGR3	3.15746	0.149275	21.1519	2.6505e-99	2.55431e-97	KLK3	-2.38796	0.34853	-6.8515	7.30785e-12	4.50943e-11
PKMYT1	3.97612	0.117236	33.9155	3.9385e-252	1.9319e-248	FAM71E1	1.00549	0.1097	9.16587	4.91467e-20	5.81522e-19
WFIKKN1	1.45525	0.133698	10.8846	1.36513e-27	1.31144e-26	PTH2	-1.70986	0.519059	-3.29415	0.000987199	0.00239492
WDR24	1.02321	0.0704445	14.525	8.41281e-48	1.75827e-46	IGLON5	1.53388	0.179629	8.53912	1.35247e-17	1.34421e-16
FBXL16	1.99401	0.141142	14.1277	2.56344e-45	4.91947e-44	MMEL1	-1.11639	0.120762	-9.24451	2.36315e-20	2.85877e-19
CHTF18	1.82251	0.0997117	18.2778	1.24433e-74	5.91445e-73	PADI1	1.29644	0.235375	5.508	3.62942e-08	1.55742e-07
GNG13	5.89817	0.266041	22.1701	6.673e-109	7.9641e-107	EPHA2	1.06101	0.0917553	11.5635	6.30767e-31	1.52763e-29
KDM4B	1.14224	0.0950404	12.0185	2.84208e-33	3.47482e-32	EVA1B	-1.41158	0.139624	-10.1099	4.99268e-24	7.82465e-23
IL17B	-2.06253	0.20054	-10.2849	8.24502e-25	6.98626e-24	C1orf94	4.48637	0.482138	9.30517	1.33772e-20	1.64904e-19
VIL1	2.46012	0.242334	10.1518	3.25316e-24	2.68417e-23	DMRTA2	4.48315	0.294789	15.208	3.12939e-52	2.58819e-50
PNKD	1.01339	0.0731573	13.8522	1.23392e-43	2.21546e-42	PRKACB	-1.12968	0.164844	-6.85302	7.23049e-12	4.46509e-11
GNG11	-2.16685	0.0889547	-24.3591	4.6476e-131	9.5387e-129	TINAGL1	1.27449	0.122387	10.4137	2.14779e-25	3.70781e-24
GNGT1	4.80339	0.441835	10.8715	1.57643e-27	1.51e-26	KIF2C	1.36755	0.113098	12.0917	1.16884e-33	3.35747e-32
FGL2	-1.17405	0.111868	-10.4949	9.11716e-26	8.08707e-25	CYP4B1	-2.89913	0.209319	-13.8503	1.26748e-43	6.51572e-42
GNAI1	-2.50115	0.104888	-23.8458	1.1189e-125	2.0403e-123	TMEM61	1.12256	0.166456	6.74391	1.54185e-11	9.23079e-11
SGCE	-1.0582	0.112203	-9.43115	4.05615e-21	2.90668e-20	LMO4	1.76451	0.112867	15.6335	4.30343e-55	4.1856e-53
LRFN1	1.62981	0.109832	14.8392	8.17286e-50	1.82225e-48	BARHL2	4.18088	0.360689	11.5914	4.55721e-31	1.10922e-29
ZFP36	-2.17763	0.123493	-17.6337	1.35822e-69	5.45201e-68	FNDC7	1.75709	0.226403	7.76091	8.43222e-15	6.74342e-14
RASL11B	1.71271	0.112525	15.2207	2.57569e-52	6.20849e-51	PROK1	-1.31218	0.252748	-5.19166	2.08422e-07	8.24382e-07
KDR	-1.10458	0.0795099	-13.8923	7.05065e-44	1.27714e-42	GPR161	1.31819	0.108836	12.1117	9.16069e-34	2.64388e-32
ADM2	2.19007	0.113868	19.2334	1.94624e-82	1.16281e-80	RXRG	-1.21536	0.173441	-7.00733	2.42915e-12	1.5732e-11
ASPHD2	1.05256	0.0771553	13.6421	2.25092e-42	3.84043e-41	TBX19	1.76747	0.0889078	19.8799	6.07909e-88	2.71231e-85
VPREB3	1.80162	0.192576	9.35537	8.33089e-21	5.88235e-20	MAEL	1.4633	0.2166	6.75575	1.42102e-11	8.53579e-11
SDF2L1	1.47466	0.0971675	15.1765	5.0624e-52	1.20837e-50	ADCY10	-1.117	0.168593	-6.62543	3.46243e-11	2.00693e-10
GAL3ST1	-1.04505	0.1717	-6.08649	1.15414e-09	4.35317e-09	NUF2	1.11359	0.122989	9.05433	1.37405e-19	1.58083e-18
RFPL1	1.98533	0.298476	6.65157	2.89989e-11	1.22372e-10	PFDN2	1.07481	0.0877661	12.2463	1.75903e-34	5.29352e-33
RFPL2	1.28011	0.170244	7.51924	5.50939e-14	2.74139e-13	FCRL5	1.41571	0.216941	6.52579	6.76425e-11	3.82681e-10
MGAT3	-1.32673	0.148042	-8.96186	3.19246e-19	2.08517e-18	CASQ1	-1.58815	0.17834	-8.90517	5.33033e-19	5.89403e-18
ADORA2A	1.64418	0.151552	10.849	2.01653e-27	1.92105e-26	ECM1	-2.28373	0.177939	-12.8344	1.05271e-37	3.80625e-36
MCHR1	1.4916	0.173208	8.6116	7.20465e-18	4.39774e-17	ADAMTSL4	1.0587	0.120372	8.79523	1.42761e-18	1.52921e-17
BAIAP2L2	1.25356	0.155405	8.06644	7.23772e-16	3.99622e-15	ANP32E	1.51785	0.0911691	16.6488	3.08947e-62	4.30498e-60
GALR3	1.2928	0.265765	4.86445	1.14777e-06	3.4107e-06	MINDY1	-1.09665	0.0842416	-13.0179	9.67921e-39	3.72987e-37
APOL5	-1.20274	0.160478	-7.49475	6.64271e-14	3.28831e-13	ANXA9	-2.33026	0.11905	-19.5738	2.58416e-85	1.08337e-82
C22orf23	-1.08058	0.0995299	-10.8568	1.85023e-27	1.76468e-26	HORMAD1	4.48184	0.295417	15.1712	5.48451e-52	4.46763e-50
APOBEC3A	1.52505	0.188798	8.07768	6.60109e-16	3.65666e-15	KCNH1	-3.37941	0.204526	-16.5232	2.49922e-61	3.31171e-59
RIBC2	1.79679	0.102636	17.5065	1.27892e-68	5.00667e-67	VASH2	1.04442	0.136647	7.6432	2.11893e-14	1.6419e-13
KRT17	-1.68306	0.226972	-7.41528	1.21364e-13	5.91355e-13	TP53BP2	1.06964	0.0779877	13.7155	8.19476e-43	4.01329e-41
TBC1D27P	1.09847	0.220561	4.98035	6.34682e-07	1.93057e-06	S100A8	2.11651	0.285962	7.40136	1.34792e-13	9.75603e-13
RNF112	-1.03182	0.131585	-7.84147	4.45297e-15	2.36061e-14	CREB3L4	-1.06976	0.0963286	-11.1054	1.18143e-28	2.50564e-27
CPA4	1.13242	0.199046	5.6892	1.27633e-08	4.46298e-08	AQP10	-2.11193	0.271621	-7.77531	7.52625e-15	6.04474e-14
VGF	4.65716	0.228087	20.4184	1.1487e-92	9.2522e-91	ACTA1	1.88456	0.225809	8.34583	7.07164e-17	6.67122e-16
FOXP2	-2.04433	0.13222	-15.4615	6.31042e-54	1.5931e-52	SCCPDH	-1.36886	0.0957612	-14.2945	2.36839e-46	1.42757e-44
STRIP2	1.32874	0.106597	12.4651	1.15704e-35	1.55793e-34	MAP3K21	1.89228	0.130701	14.4779	1.67074e-47	1.08768e-45
FLNC	-1.60638	0.128423	-12.5085	6.71162e-36	9.12468e-35	LEFTY2	3.61755	0.24048	15.043	3.83782e-51	3.02002e-49
CCDC136	-1.34359	0.103386	-12.9958	1.29296e-38	1.93419e-37	LBR	1.18321	0.0833425	14.197	9.56098e-46	5.52209e-44
FEZF1	2.13157	0.35941	5.93075	3.01553e-09	1.1075e-08	OSR1	2.13105	0.200055	10.6523	1.70041e-26	3.15019e-25
MRPS12	1.23977	0.0821267	15.0959	1.72401e-51	4.0696e-50	RHOB	-1.51605	0.0829656	-18.2733	1.35059e-74	3.35106e-72
HOXD3	-1.12355	0.112469	-9.98986	1.68815e-23	1.35483e-22	ATP6V1C2	2.35697	0.146346	16.1054	2.3367e-58	2.65505e-56
PDE11A	-2.45175	0.144647	-16.9499	1.9274e-64	6.67205e-63	ABCG8	1.15797	0.220798	5.24448	1.5672e-07	6.28833e-07
GAD1	2.82473	0.226528	12.4697	1.09227e-35	1.47273e-34	TRIM43	4.31282	0.47958	8.99292	2.40751e-19	2.72088e-18
TMOD2	-1.11112	0.0930269	-11.9441	6.96844e-33	8.39636e-32	NAT8	-1.77824	0.181048	-9.82194	9.0583e-23	1.29487e-21
ELL3	1.02741	0.09061	11.3388	8.42455e-30	8.9099e-29	SFXN5	-1.06375	0.10602	-10.0335	1.08631e-23	1.66493e-22
ALDH1A2	-2.83145	0.144097	-19.6496	5.82819e-86	3.92698e-84	DQX1	-1.557	0.203006	-7.6697	1.72404e-14	1.34491e-13
KNSTRN	1.18124	0.0753723	15.672	2.3494e-55	6.24623e-54	MALL	1.61705	0.142927	11.3139	1.12033e-29	2.52704e-28
CHAC1	1.4714	0.141118	10.4267	1.87189e-25	1.63293e-24	C1QL2	4.77827	0.293188	16.2976	1.02577e-59	1.26289e-57
LOXL1	1.38577	0.098072	14.1301	2.47728e-45	4.75598e-44	NT5DC4	2.40919	0.157063	15.339	4.19413e-53	3.62282e-51
ACKR4	-1.6499	0.125953	-13.0994	3.3199e-39	5.06998e-38	CNGA3	-2.99536	0.233815	-12.8108	1.42649e-37	5.11591e-36
BBOX1	-2.01512	0.224027	-8.99501	2.36201e-19	1.55331e-18	AFF3	-3.31924	0.171324	-19.3741	1.27732e-83	4.70586e-81
MYOD1	1.46492	0.4405	3.32558	0.000882348	0.00192986	SPOPL	-1.18424	0.0749372	-15.8031	2.96063e-56	3.03752e-54
KCNC1	1.04738	0.228846	4.57678	4.72176e-06	1.32335e-05	GPR17	1.06755	0.182667	5.84423	5.08919e-09	2.38708e-08
E2F8	3.32682	0.132936	25.0256	3.2155e-138	7.3704e-136	GALNT13	2.66715	0.201866	13.2125	7.4327e-40	3.09204e-38
PIMREG	3.03428	0.127126	23.8684	6.5291e-126	1.204e-123	SLC4A10	-2.84843	0.257672	-11.0545	2.08534e-28	4.35995e-27
USP6	-1.51932	0.112754	-13.4747	2.20433e-41	3.62355e-40	ZNF385B	-2.92179	0.229742	-12.7177	4.71765e-37	1.64226e-35
TXNDC17	1.06948	0.0666995	16.0342	7.37003e-58	2.11165e-56	CDCA7	2.07426	0.160753	12.9034	4.30628e-38	1.59496e-36
ATP1B2	-1.44329	0.11448	-12.6074	1.92212e-36	2.66715e-35	DLX1	-1.81945	0.287738	-6.32328	2.56062e-10	1.37007e-09
LRRC6	1.30619	0.122587	10.6552	1.64968e-26	1.50802e-25	PHOSPHO2	-1.13463	0.0795039	-14.2714	3.2978e-46	1.96538e-44
AP1M2	1.56571	0.0831529	18.8292	4.35064e-79	2.37383e-77	CCDC150	1.26647	0.10197	12.42	2.03625e-35	6.4011e-34
CDKN2D	1.17691	0.0853065	13.7962	2.68463e-43	4.76607e-42	UNC80	2.72771	0.248656	10.9698	5.33878e-28	1.08951e-26
ADCY4	-1.74206	0.0976168	-17.8459	3.11156e-71	1.3226e-69	PTH2R	2.07516	0.184051	11.275	1.74443e-29	3.89145e-28
FOXA1	1.81593	0.155643	11.6673	1.87329e-31	2.12116e-30	CPO	-1.06574	0.136399	-7.81339	5.56699e-15	4.51665e-14
EGLN3	1.59801	0.137476	11.6239	3.1141e-31	3.50431e-30	TRPM8	4.20539	0.26629	15.7925	3.5035e-56	3.57938e-54
RNASE1	-1.52256	0.109259	-13.9354	3.86271e-44	7.06991e-43	2020-03-04	-1.14137	0.187115	-6.09984	1.06177e-09	5.34966e-09
CDO1	-3.67285	0.152796	-24.0376	1.1241e-127	2.1881e-125	ACKR2	1.03151	0.193959	5.31816	1.0482e-07	4.28289e-07
FOXJ1	4.47911	0.253751	17.6516	9.89254e-70	4.00701e-68	STAC	3.0127	0.155377	19.3897	9.43264e-84	3.52861e-81
ARHGEF6	-1.40523	0.101164	-13.8905	7.23234e-44	1.30908e-42	CAND2	1.09873	0.136109	8.07244	6.89073e-16	6.01082e-15
MAP7D3	-1.88931	0.100109	-18.8726	1.91457e-79	1.05284e-77	LRIG1	-1.28112	0.0834852	-15.3455	3.79693e-53	3.29142e-51
ART1	1.93216	0.268257	7.20264	5.90565e-13	2.7639e-12	LRTM1	-1.10745	0.384216	-2.88237	0.00394694	0.00865475
CDKN1C	-2.11558	0.104617	-20.2222	6.24415e-91	4.81585e-89	TAGLN3	2.06185	0.29399	7.01333	2.32714e-12	1.51056e-11
SGO1	3.27144	0.119325	27.4161	1.7607e-165	7.643e-163	IGSF11	1.26693	0.169795	7.46151	8.55384e-14	6.30275e-13
CDH15	1.81596	0.168305	10.7897	3.85097e-27	3.62151e-26	NR1I2	1.53121	0.146862	10.4261	1.88381e-25	3.27184e-24
TMEM8A	1.31764	0.0679924	19.3792	1.15534e-83	7.23777e-82	BOC	1.11784	0.128215	8.71854	2.81817e-18	2.95558e-17
PLPPR3	1.7908	0.211916	8.45054	2.89954e-17	1.71835e-16	TMEM108	1.18039	0.168078	7.02289	2.17327e-12	1.41408e-11
SYT5	3.73885	0.242178	15.4384	9.02821e-54	2.26523e-52	AGTR1	-4.85346	0.25033	-19.3883	9.69615e-84	3.59949e-81
TNNI3	4.0902	0.262392	15.5881	8.76571e-55	2.28954e-53	SPATA16	1.77097	0.516523	3.42864	0.000606609	0.00152431
GAMT	1.01809	0.130303	7.81324	5.57344e-15	2.93745e-14	FLJ33534	-2.1454	0.222162	-9.65692	4.59473e-22	6.27834e-21
PRRG3	-3.00695	0.158813	-18.9339	5.99312e-80	3.34823e-78	AHSG	2.88169	0.38261	7.53167	5.0095e-14	3.76184e-13
GALNT8	-1.78478	0.14365	-12.4245	1.92475e-35	2.56626e-34	ECE2	1.39256	0.0991487	14.0451	8.2512e-45	4.52894e-43
KCNA5	-1.3015	0.137454	-9.46866	2.83468e-21	2.0442e-20	EPHA5	-1.13405	0.215055	-5.2733	1.33993e-07	5.41709e-07
STARD8	-1.13484	0.0739393	-15.3482	3.64107e-53	8.984e-52	SLC10A4	1.07775	0.151379	7.11953	1.08299e-12	7.23648e-12
FAM155B	1.58716	0.14899	10.6528	1.69206e-26	1.54532e-25	PLAC8	1.36129	0.160151	8.50007	1.89469e-17	1.86444e-16
GDPD2	2.3479	0.208015	11.2872	1.51801e-29	1.58665e-28	CCNA2	1.12646	0.113168	9.95389	2.4251e-23	3.61432e-22
ANGPTL8	-3.87289	0.196188	-19.7407	9.64431e-87	6.64428e-85	RNF175	1.18679	0.112061	10.5906	3.29455e-26	6.00514e-25
CNN1	-3.1335	0.144318	-21.7124	1.5668e-104	1.7079e-102	GLRA3	-4.36426	0.349435	-12.4895	8.52298e-36	2.73224e-34
ZSCAN10	1.03826	0.248182	4.18346	2.87105e-05	7.45807e-05	ROPN1L	-2.53934	0.163734	-15.5089	3.01963e-54	2.7971e-52
NECTIN2	1.30088	0.0721434	18.0318	1.09567e-72	4.89034e-71	CDH18	-2.37876	0.364848	-6.51985	7.03783e-11	3.97603e-10
TOMM40	1.22984	0.0742923	16.5541	1.49531e-61	4.73824e-60	SRD5A1	1.49386	0.115114	12.9773	1.64664e-38	6.2463e-37
APOC1	1.09276	0.123372	8.85744	8.18702e-19	5.21952e-18	MYO10	1.25704	0.105499	11.9151	9.87038e-33	2.67115e-31
GADD45G	1.33392	0.137432	9.70607	2.84091e-22	2.14686e-21	SKP2	1.28235	0.0851334	15.0629	2.84163e-51	2.24702e-49
LRCH2	-1.31969	0.0988546	-13.3498	1.18809e-40	1.90202e-39	UGT3A1	-1.91983	0.363851	-5.27642	1.31734e-07	5.33109e-07
DPP6	-2.94664	0.218264	-13.5003	1.55683e-41	2.57384e-40	GZMA	1.00295	0.152643	6.57058	5.01195e-11	2.86951e-10
ATP8B3	1.12823	0.121659	9.27373	1.79746e-20	1.24762e-19	ANKRD31	-1.00267	0.125956	-7.96045	1.71413e-15	1.44646e-14
NCAN	4.1695	0.345224	12.0777	1.38586e-33	1.71534e-32	LIX1	2.22828	0.208381	10.6933	1.09403e-26	2.0463e-25
KIF1A	4.59505	0.283376	16.2154	3.92448e-59	1.16669e-57	ADAMTS19	-1.5727	0.25004	-6.28979	3.17896e-10	1.68442e-09
BST2	1.38626	0.128463	10.7911	3.79306e-27	3.57047e-26	CXCL14	-2.71346	0.223565	-12.1373	6.7026e-34	1.95886e-32
USHBP1	-1.86425	0.0964284	-19.333	2.8355e-83	1.74513e-81	SLC25A48	-4.34677	0.250861	-17.3274	2.92326e-67	5.05911e-65
MAS1	-1.97746	0.219879	-8.99342	2.39655e-19	1.57518e-18	IL9	-1.86945	0.487566	-3.83424	0.000125952	0.000350772
FUT5	1.36215	0.376255	3.62027	0.000294296	0.000681995	TIMD4	1.1422	0.171888	6.64503	3.03164e-11	1.76755e-10
EPO	3.15359	0.241728	13.046	6.69662e-39	1.00978e-37	GLRA1	-1.01975	0.296584	-3.43832	0.000585343	0.00147466
ARPC1B	1.06392	0.0820223	12.9711	1.78543e-38	2.65551e-37	CPLX2	-5.94114	0.454635	-13.0679	5.0215e-39	1.97894e-37
CACNG6	3.38502	0.342517	9.88277	4.94477e-23	3.87647e-22	TENM2	-1.21103	0.176797	-6.84981	7.39464e-12	4.56067e-11
UNC13A	2.88154	0.189932	15.1714	5.46926e-52	1.30486e-50	KCNMB1	1.29203	0.135289	9.55016	1.29495e-21	1.71081e-20
KLHDC7B	2.74211	0.208317	13.1631	1.43036e-39	2.21402e-38	MYLK4	1.33177	0.0982501	13.5549	7.41631e-42	3.44144e-40
GDF15	2.36232	0.177373	13.3184	1.80919e-40	2.88038e-39	LRRTM2	-1.03697	0.141094	-7.34949	1.98971e-13	1.41879e-12
IQCN	-1.51414	0.127269	-11.8971	1.22477e-32	1.45819e-31	GFRA3	4.5862	0.217449	21.091	9.6286e-99	7.67624e-96
LSM4	1.38543	0.07109	19.4883	1.3787e-84	8.89844e-83	DCDC2	-1.67131	0.222144	-7.52353	5.33157e-14	3.99102e-13
HRC	-1.18413	0.128639	-9.20506	3.41493e-20	2.34508e-19	TNFRSF21	1.50021	0.103965	14.4299	3.35574e-47	2.12768e-45
SULT4A1	1.59103	0.215354	7.38798	1.49077e-13	7.22509e-13	RASGEF1C	3.56519	0.219532	16.24	2.62961e-59	3.1811e-57
CRB3	1.57351	0.0772798	20.3611	3.69855e-92	2.91206e-90	MLIP	2.02632	0.184654	10.9736	5.11828e-28	1.04627e-26
SAG	1.48	0.192273	7.69742	1.38841e-14	7.14331e-14	SCUBE3	1.05632	0.19115	5.5261	3.27434e-08	1.41115e-07
HELZ2	1.17962	0.0936366	12.5979	2.1692e-36	2.99645e-35	CYP39A1	1.93672	0.162872	11.8911	1.31728e-32	3.54317e-31
SAMD10	1.2173	0.077564	15.6942	1.65745e-55	4.43543e-54	TPBG	-1.16915	0.0820198	-14.2545	4.20309e-46	2.48662e-44
TNNT3	-2.96128	0.192855	-15.3549	3.28187e-53	8.10585e-52	PM20D2	1.94375	0.139397	13.944	3.42119e-44	1.83233e-42
COL5A1	1.89231	0.114026	16.5954	7.52232e-62	2.41324e-60	CLVS2	-1.72498	0.328568	-5.25	1.52101e-07	6.10802e-07
CALY	2.0069	0.243594	8.23869	1.74104e-16	9.92692e-16	GPR6	-3.85613	0.46908	-8.22062	2.02455e-16	1.84099e-15
HBZ	-1.4856	0.244318	-6.08061	1.19729e-09	4.51072e-09	ABRACL	1.31978	0.089961	14.6706	9.94702e-49	6.88099e-47
PAK4	1.23033	0.0694869	17.706	3.76924e-70	1.54848e-68	MTFR2	1.28266	0.113596	11.2914	1.44738e-29	3.24216e-28
MNX1	3.17978	0.217835	14.5972	2.92774e-48	6.19816e-47	SLC2A12	1.96726	0.175788	11.1911	4.50915e-29	9.807e-28
CEP85	1.04522	0.065762	15.8939	6.98373e-57	1.9464e-55	PNLDC1	1.53101	0.23804	6.43176	1.26132e-10	6.94982e-10
GATA5	4.28929	0.336499	12.7468	3.24708e-37	4.6167e-36	ARMT1	-2.61805	0.12873	-20.3375	5.98728e-92	3.50804e-89
RBBP8NL	1.60612	0.0998687	16.0823	3.39398e-58	9.82192e-57	LINC01558	1.58252	0.152246	10.3945	2.62658e-25	4.50777e-24
PRDM12	1.58511	0.149898	10.5746	3.90863e-26	3.52179e-25	VWDE	1.11619	0.209584	5.32575	1.00537e-07	4.11168e-07
FIBCD1	2.64007	0.236805	11.1487	7.26561e-29	7.39558e-28	EGFR	1.50015	0.149807	10.0139	1.32451e-23	2.01666e-22
METTL26	1.2175	0.0835159	14.5781	3.87188e-48	8.16875e-47	CDCA5	1.02988	0.117361	8.77533	1.70402e-18	1.81014e-17
NPAS1	1.13891	0.13134	8.67149	4.26502e-18	2.63055e-17	TRIM50	1.33273	0.203845	6.53792	6.2379e-11	3.54056e-10
ARHGEF16	1.15879	0.0838046	13.8272	1.74582e-43	3.1197e-42	ZNF92	-1.30414	0.111362	-11.7108	1.12247e-31	2.8401e-30
SMPDL3B	1.04117	0.106559	9.77078	1.50288e-22	1.15061e-21	ASB15	-3.02001	0.302773	-9.97451	1.9707e-23	2.95976e-22
ANGPTL6	1.34634	0.106841	12.6013	2.07725e-36	2.87428e-35	ZAN	-1.14909	0.214153	-5.36573	8.06205e-08	3.33304e-07
DNMT1	1.01309	0.063325	15.9982	1.31459e-57	3.73383e-56	STRA8	2.87617	0.41399	6.94743	3.72003e-12	2.3673e-11
PNCK	2.54227	0.185922	13.6738	1.45514e-42	2.50711e-41	ASB10	1.8591	0.483914	3.8418	0.000122135	0.000340844
PLXNA3	1.12809	0.0660171	17.0878	1.82851e-65	6.56603e-64	RAB19	-1.36069	0.116618	-11.668	1.85771e-31	4.60461e-30
SLC7A10	-4.69279	0.213845	-21.9448	9.7159e-107	1.1058e-104	CLTRN	1.11946	0.111734	10.0189	1.25842e-23	1.92025e-22
NUTM2F	1.2446	0.267649	4.65011	3.31761e-06	9.4394e-06	LANCL3	1.54395	0.128259	12.0377	2.25084e-33	6.33821e-32
HABP4	-1.17939	0.0684912	-17.2195	1.89574e-66	6.95512e-65	SYTL5	-2.92932	0.201972	-14.5036	1.14966e-47	7.55529e-46
RGN	-2.00363	0.16554	-12.1036	1.01047e-33	1.25706e-32	MSN	1.11662	0.0752085	14.847	7.27061e-50	5.34912e-48
ULBP2	1.74805	0.158591	11.0224	2.98114e-28	2.95356e-27	AWAT2	2.74892	0.285407	9.63159	5.88113e-22	7.95565e-21
AKAP12	-2.67275	0.118782	-22.5012	4.0356e-112	5.1957e-110	IL2RG	1.1534	0.142701	8.08265	6.33758e-16	5.54521e-15
SYNE1	-1.41095	0.0891275	-15.8307	1.90979e-56	5.25696e-55	ZNF711	1.02296	0.144091	7.09938	1.25322e-12	8.33156e-12
EPS8L1	1.37996	0.108628	12.7036	5.64718e-37	7.96451e-36	RIPPLY1	1.11285	0.171481	6.48964	8.60397e-11	4.8244e-10
TTLL9	1.07096	0.14856	7.20893	5.63913e-13	2.64269e-12	IGSF1	-1.3204	0.267213	-4.94139	7.75672e-07	2.87338e-06
BPIFA2	3.62115	0.444378	8.1488	3.67558e-16	2.06452e-15	ARHGAP36	-2.56668	0.385722	-6.65422	2.84815e-11	1.66376e-10
DEFB118	-1.12833	0.512945	-2.19971	0.0278276	0.0491024	MAGEA4	3.94349	0.6297	6.26249	3.78877e-10	1.99363e-09
ACSS2	-1.68588	0.0681685	-24.7311	4.9514e-135	1.0891e-132	CHRNA6	-1.40796	0.159522	-8.82614	1.08348e-18	1.17142e-17
EDA2R	-1.04173	0.107378	-9.70153	2.97012e-22	2.24311e-21	GNRH1	1.15628	0.105235	10.9876	4.38644e-28	8.99313e-27
GFAP	-2.46127	0.196915	-12.4992	7.54374e-36	1.02276e-34	SLC25A37	1.40485	0.0969257	14.4941	1.32114e-47	8.63554e-46
PYY	2.68092	0.229077	11.7032	1.22797e-31	1.40048e-30	STAR	1.32774	0.17885	7.42378	1.13825e-13	8.29776e-13
CCL25	1.87973	0.208835	9.00103	2.23606e-19	1.47246e-18	ST18	1.51485	0.140367	10.792	3.75462e-27	7.2256e-26
GINS2	2.1051	0.1059	19.8782	6.28776e-88	4.48948e-86	RGS20	2.09819	0.174884	11.9976	3.65656e-33	1.01381e-31
SLC34A1	1.35383	0.219388	6.17093	6.78886e-10	2.60732e-09	GINS4	1.05339	0.122801	8.57801	9.65275e-18	9.69081e-17
F12	2.85128	0.134566	21.1887	1.2147e-99	1.17984e-97	TRIM55	1.56905	0.249636	6.28534	3.27139e-10	1.73188e-09
PRR7	1.86649	0.123594	15.1018	1.57552e-51	3.72088e-50	SLC26A7	2.05685	0.190911	10.7738	4.57582e-27	8.75057e-26
IDO1	1.95381	0.203566	9.59792	8.15758e-22	6.04632e-21	PSKH2	-2.47923	0.319354	-7.76325	8.27794e-15	6.63094e-14
RAB11FIP4	1.19601	0.0850142	14.0684	5.93989e-45	1.12365e-43	SYBU	-2.02023	0.130197	-15.5167	2.67642e-54	2.48866e-52
GALNT15	-3.18098	0.137473	-23.139	1.8764e-118	2.8673e-116	DPYS	1.42395	0.174666	8.15239	3.56787e-16	3.18307e-15
LRRC4B	-1.00787	0.131688	-7.65341	1.95712e-14	9.99554e-14	RSPO2	1.40113	0.270861	5.17289	2.30498e-07	9.06467e-07
PDLIM4	-1.15739	0.116243	-9.95669	2.35784e-23	1.88121e-22	GSDMC	2.10896	0.205051	10.285	8.23008e-25	1.36042e-23
TUBG1	1.09299	0.0675823	16.1728	7.85047e-59	2.30588e-57	FAM135B	-3.01475	0.249183	-12.0986	1.07484e-33	3.08926e-32
AOC3	-3.93196	0.12728	-30.8923	1.5172e-209	2.1889e-206	VLDLR	1.11811	0.112485	9.94005	2.78686e-23	4.13068e-22
AOC2	-2.29923	0.119281	-19.2757	8.58663e-83	5.20632e-81	NFIB	1.5218	0.12182	12.4922	8.23033e-36	2.64017e-34
KREMEN2	3.922	0.176133	22.2673	7.6635e-110	9.4214e-108	CER1	2.04646	0.324777	6.30114	2.95465e-10	1.57087e-09
THOC6	1.09366	0.0711048	15.381	2.19621e-53	5.44909e-52	CDKN2A	2.52159	0.156188	16.1446	1.23995e-58	1.44604e-56
BARX1	1.4049	0.230563	6.09335	1.10569e-09	4.17717e-09	IFNK	-1.80007	0.563276	-3.19572	0.00139484	0.00329989
MAP1B	-1.15767	0.109394	-10.5826	3.59044e-26	3.23985e-25	SHC3	1.16324	0.120152	9.68141	3.61694e-22	4.97864e-21
CKMT2	-2.23961	0.123999	-18.0615	6.40635e-73	2.88562e-71	ZNF462	1.55235	0.1234	12.5798	2.7259e-36	9.02403e-35
KRT34	3.16851	0.482462	6.56738	5.12099e-11	2.1214e-10	UGCG	-2.07676	0.113602	-18.2811	1.171e-74	2.92036e-72
TNS4	-1.59582	0.170577	-9.35541	8.3276e-21	5.88087e-20	ASTN2	-1.58198	0.129199	-12.2445	1.79822e-34	5.40476e-33
TOP2A	3.49697	0.12925	27.0559	3.2594e-161	1.2589e-158	LCN2	3.23176	0.250908	12.8803	5.81232e-38	2.13166e-36
STARD3	1.25977	0.129197	9.75073	1.83154e-22	1.39656e-21	NOTCH1	1.05233	0.0854591	12.3138	7.63353e-35	2.33622e-33
RARA	1.22173	0.101735	12.0089	3.18875e-33	3.88801e-32	CACNA1B	1.70158	0.222742	7.63922	2.18538e-14	1.69204e-13
KRT17P1	-1.08625	0.240371	-4.51906	6.2116e-06	1.72239e-05	USP6NL	1.03668	0.0702528	14.7564	2.79702e-49	1.97133e-47
LIN28A	4.05881	0.379815	10.6863	1.18015e-26	1.0865e-25	PDSS1	1.30259	0.0745838	17.4648	2.65685e-68	4.80317e-66
C19orf12	-1.25765	0.0725969	-17.3238	3.11181e-67	1.16966e-65	FAM171A1	2.39308	0.113128	21.1537	2.5519e-99	2.13965e-96
FAAP24	1.18329	0.059472	19.8966	4.35644e-88	3.12873e-86	SLC39A12	3.26158	0.307367	10.6113	2.63945e-26	4.8328e-25
RTBDN	5.4759	0.281021	19.4857	1.45138e-84	9.35521e-83	RSU1	1.18627	0.0705309	16.8192	1.76559e-63	2.61776e-61
MATN3	2.85947	0.139251	20.5346	1.05681e-93	8.71238e-92	ST8SIA6	-2.14942	0.172025	-12.4948	7.9691e-36	2.55975e-34
SLC6A11	1.2442	0.237592	5.23671	1.63464e-07	5.21002e-07	ANKRD30A	-4.58098	0.262388	-17.4588	2.95125e-68	5.31563e-66
PPARG	-3.38827	0.121304	-27.932	1.0918e-171	5.4648e-169	RGR	3.65704	0.379335	9.64066	5.384e-22	7.31572e-21
NUP210	1.91542	0.0801323	23.9033	2.8331e-126	5.3042e-124	ANKRD1	3.51104	0.22267	15.7679	5.1749e-56	5.26487e-54
FCRLA	1.7149	0.200734	8.54316	1.30604e-17	7.87411e-17	HABP2	-1.81377	0.252792	-7.17496	7.23287e-13	4.90437e-12
HSD17B7	1.27273	0.0728982	17.4589	2.94328e-68	1.1413e-66	VAX1	4.03537	0.47932	8.41894	3.79902e-17	3.66422e-16
EMILIN2	-1.4209	0.0969114	-14.6619	1.13089e-48	2.43193e-47	NPFFR1	2.12227	0.182499	11.6289	2.937e-31	7.21725e-30
HHLA1	1.16954	0.412733	2.83365	0.00460194	0.00916613	MKI67	1.03525	0.119048	8.69606	3.43619e-18	3.57751e-17
PER2	-1.22488	0.0689497	-17.7648	1.32306e-70	5.50921e-69	CYP17A1	-1.0456	0.129577	-8.06932	7.06912e-16	6.1609e-15
RAMP1	3.06621	0.173112	17.7123	3.37177e-70	1.38868e-68	INA	2.46867	0.309531	7.97552	1.51744e-15	1.28652e-14
CARD6	-1.24425	0.0863975	-14.4014	5.06786e-47	1.03579e-45	FUOM	1.19006	0.107885	11.0308	2.71445e-28	5.63648e-27
SERPINF1	-1.26728	0.102179	-12.4025	2.53283e-35	3.36148e-34	ADM	1.06478	0.157361	6.76643	1.31999e-11	7.95741e-11
SEC61G	1.05206	0.0786174	13.3821	7.69788e-41	1.24209e-39	SLC5A12	-2.4314	0.304412	-7.9872	1.38038e-15	1.17441e-14
FTHL17	4.08987	1.03134	3.9656	7.32108e-05	0.00018183	LRRC4C	-1.36482	0.165236	-8.25978	1.45942e-16	1.34089e-15
ENAM	-1.61431	0.172675	-9.34884	8.86177e-21	6.2509e-20	SAA4	2.41416	0.228536	10.5636	4.39515e-26	7.93689e-25
JCHAIN	-1.88706	0.190267	-9.91793	3.4791e-23	2.75342e-22	SYT8	2.18192	0.257374	8.47763	2.29825e-17	2.25017e-16
CLEC10A	-1.22103	0.169362	-7.2096	5.61157e-13	2.63028e-12	ZNF214	-1.44346	0.138546	-10.4186	2.03882e-25	3.52972e-24
SLC52A1	1.31338	0.16338	8.0388	9.07238e-16	4.98564e-15	GLYAT	-1.42277	0.265104	-5.36681	8.01405e-08	3.31517e-07
MATN2	-2.51483	0.139268	-18.0575	6.89194e-73	3.1015e-71	CCDC82	1.25529	0.0808416	15.5278	2.251e-54	2.10516e-52
HSPA12B	-1.36723	0.0966573	-14.1451	2.0018e-45	3.84616e-44	ZC3H12C	1.12967	0.103809	10.8821	1.4023e-27	2.78688e-26
PCNA	1.39898	0.0685772	20.4	1.67245e-92	1.34048e-90	NCAM1	1.08908	0.174653	6.23567	4.49846e-10	2.35205e-09
RHBG	2.68385	0.179428	14.9578	1.3852e-50	3.16768e-49	HTR3B	1.87593	0.520873	3.60152	0.000316359	0.000830268
ATP1A4	1.221	0.206325	5.91781	3.26248e-09	1.19489e-08	GRIK4	-1.91891	0.162943	-11.7766	5.15393e-32	1.33462e-30
NES	-1.00521	0.119803	-8.39051	4.84029e-17	2.83595e-16	ST14	1.15131	0.0846757	13.5967	4.19114e-42	1.97117e-40
RAB25	1.49533	0.0847577	17.6424	1.16402e-69	4.6878e-68	ADAM33	-1.07759	0.155219	-6.94237	3.85566e-12	2.44912e-11
FCRL2	1.28616	0.218258	5.89286	3.79561e-09	1.38087e-08	ZP1	1.07288	0.201928	5.31319	1.07722e-07	4.39632e-07
TESMIN	1.99248	0.110474	18.0357	1.02242e-72	4.56755e-71	MS4A2	-2.19516	0.169644	-12.9398	2.68379e-38	1.00474e-36
VSTM2L	2.63532	0.204217	12.9045	4.24486e-38	6.23409e-37	CHEK1	1.2158	0.0883006	13.7689	3.92306e-43	1.95875e-41
DMGDH	-2.73899	0.107254	-25.5374	7.5826e-144	1.9576e-141	KIRREL3	1.34044	0.179628	7.4623	8.50229e-14	6.26572e-13
BHMT2	-3.12595	0.131282	-23.811	2.5694e-125	4.6507e-123	MPZL2	1.40972	0.107281	13.1404	1.93087e-39	7.8055e-38
SYT4	2.32848	0.507567	4.58753	4.48518e-06	1.25946e-05	SCN2B	-1.69975	0.192673	-8.82193	1.12501e-18	1.21417e-17
SLC14A2	-2.06891	0.200241	-10.3321	5.04541e-25	4.31313e-24	TMEM25	-1.1561	0.0852544	-13.5606	6.85517e-42	3.18409e-40
WASF3	-2.16727	0.113987	-19.0133	1.32322e-80	7.53852e-79	JPH2	1.43644	0.154925	9.27189	1.82872e-20	2.23112e-19
PEMT	-1.03191	0.0803021	-12.8504	8.55649e-38	1.24359e-36	DUSP15	-1.07686	0.176589	-6.09811	1.07332e-09	5.40507e-09
MYBPH	1.44053	0.172196	8.36567	5.97764e-17	3.48485e-16	KIAA1755	1.49065	0.122897	12.1293	7.38569e-34	2.15332e-32
LGR6	-1.40081	0.207716	-6.74387	1.54224e-11	6.63536e-11	LINC00266-1	-1.05587	0.251183	-4.2036	2.62708e-05	8.05786e-05
EPSTI1	1.11116	0.109256	10.1702	2.69426e-24	2.23015e-23	TM7SF2	-1.00738	0.1282	-7.85786	3.90741e-15	3.20927e-14
POSTN	2.12086	0.122849	17.2639	8.79201e-67	3.25729e-65	FAM57B	-2.47286	0.167433	-14.7693	2.31146e-49	1.63623e-47
KL	-2.43814	0.125852	-19.3731	1.30157e-83	8.13305e-82	DOC2A	-1.14531	0.169846	-6.74325	1.54882e-11	9.27137e-11
BEX1	3.2841	0.305111	10.7636	5.11181e-27	4.78247e-26	HMGA2	1.05326	0.171394	6.14526	7.98334e-10	4.06958e-09
SLC39A11	1.42807	0.0862055	16.5658	1.23073e-61	3.91503e-60	CNKSR2	1.96741	0.14577	13.4967	1.63588e-41	7.42113e-40
KMT5C	1.03615	0.0811561	12.7674	2.49372e-37	3.56e-36	MKX	-3.71723	0.25913	-14.345	1.14474e-46	7.02901e-45
LGALS12	-4.45489	0.214173	-20.8004	4.29057e-96	3.78527e-94	MPP7	-1.18684	0.112651	-10.5355	5.92578e-26	1.06103e-24
RARRES3	1.42766	0.13343	10.6997	1.02121e-26	9.43002e-26	PCDH15	1.11605	0.272701	4.09256	4.26628e-05	0.000126851
HRASLS2	1.57586	0.172169	9.15297	5.53873e-20	3.76296e-19	PPIAP26	1.42058	0.213596	6.65076	2.91592e-11	1.70172e-10
MYH11	-3.17328	0.160513	-19.7697	5.43144e-87	3.74883e-85	KLHL1	-5.5381	0.68655	-8.06656	7.23047e-16	6.29475e-15
PDZD2	-2.62023	0.115726	-22.6417	1.683e-113	2.2494e-111	ADGRL3	1.38202	0.187332	7.37742	1.6139e-13	1.15983e-12
MYO18B	1.67364	0.196946	8.49797	1.92941e-17	1.1529e-16	FAM124A	1.186	0.112195	10.5709	4.06684e-26	7.36864e-25
C1QTNF6	2.19654	0.0906224	24.2383	8.7791e-130	1.7435e-127	LYPD1	2.08933	0.124573	16.772	3.91244e-63	5.67958e-61
GGT2	-1.81955	0.218006	-8.34634	7.04135e-17	4.09184e-16	LYPD6B	-2.1711	0.160431	-13.533	9.99047e-42	4.59212e-40
SEC14L4	1.58641	0.286554	5.53617	3.0915e-08	1.04937e-07	ADRA2A	-1.42377	0.137599	-10.3473	4.30605e-25	7.2939e-24
GIMAP6	-1.53501	0.0908633	-16.8936	5.01249e-64	1.7134e-62	GPM6A	-1.65385	0.224908	-7.35348	1.93109e-13	1.37902e-12
DYDC2	2.12886	0.183553	11.5981	4.21335e-31	4.70675e-30	WDR17	-1.00593	0.200772	-5.0103	5.43462e-07	2.0494e-06
TMTC1	-2.20481	0.145115	-15.1935	3.90668e-52	9.37068e-51	SPATA4	-2.39106	0.182201	-13.1232	2.42468e-39	9.72892e-38
E2F5	1.18901	0.0856866	13.8762	8.8274e-44	1.5925e-42	FSIP1	-4.37455	0.182936	-23.913	2.2445e-126	5.7449e-123
LYVE1	-4.98007	0.148649	-33.5023	4.4574e-246	1.822e-242	CCDC83	-3.42102	0.247245	-13.8365	1.53423e-43	7.82906e-42
MICAL2	1.49089	0.0850375	17.5322	8.14217e-69	3.20024e-67	PRSS23	-1.69382	0.130637	-12.9659	1.90999e-38	7.21156e-37
RRAS2	-1.03724	0.0951481	-10.9014	1.1353e-27	1.09343e-26	PIH1D2	-1.03435	0.0939598	-11.0085	3.4788e-28	7.17766e-27
TEX15	2.30489	0.384781	5.99013	2.09679e-09	7.78887e-09	C2orf50	-1.96855	0.177767	-11.0738	1.68107e-28	3.52836e-27
VRTN	3.3036	0.450122	7.33935	2.14635e-13	1.03148e-12	ITPR1	-1.66543	0.118899	-14.0071	1.41004e-44	7.69602e-43
ADAMDEC1	3.14226	0.185816	16.9106	3.76111e-64	1.29014e-62	GPR158	1.02031	0.231913	4.39955	1.08476e-05	3.49613e-05
CTIF	-1.14245	0.0706343	-16.1742	7.66792e-59	2.2536e-57	THRB	-1.04519	0.10446	-10.0056	1.44005e-23	2.18778e-22
CCNB1	2.56217	0.09129	28.0663	2.528e-173	1.3933e-170	TEX30	1.18039	0.0766333	15.4031	1.5597e-53	1.38919e-51
CAMK1	-1.45527	0.0723059	-20.1266	4.31325e-90	3.24998e-88	AL136982.1	-1.0042	0.14562	-6.89604	5.34706e-12	3.34792e-11
CNTN6	-1.68084	0.186836	-8.9963	2.33452e-19	1.53585e-18	KCTD14	2.60646	0.184031	14.1632	1.54839e-45	8.84515e-44
CHL1	-2.91716	0.164883	-17.6923	4.80672e-70	1.96811e-68	MSGN1	2.16235	0.394038	5.48767	4.07267e-08	1.73964e-07
MEIS2	-1.58923	0.102373	-15.5239	2.38979e-54	6.13739e-53	CDC123	1.01304	0.0634283	15.9715	2.01863e-57	2.19615e-55
TRPM1	-2.18847	0.201181	-10.8781	1.46602e-27	1.40616e-26	QDPR	-1.37802	0.118974	-11.5825	5.0566e-31	1.2277e-29
REG4	2.38666	0.260118	9.1753	4.50335e-20	3.07102e-19	DRD3	1.05455	0.316089	3.33626	0.000849152	0.00208267
TSHB	-1.87741	0.179437	-10.4628	1.28055e-25	1.12873e-24	AKR1C6P	2.23998	0.23089	9.7015	2.97098e-22	4.11747e-21
GSTM5	-3.71285	0.180655	-20.5521	7.37146e-94	6.10785e-92	AKR1C2	2.08456	0.237475	8.77804	1.66354e-18	1.76861e-17
VAV3	1.39684	0.122839	11.3713	5.81452e-30	6.21246e-29	DPYSL4	1.1001	0.170787	6.44134	1.18422e-10	6.54034e-10
PSRC1	1.85135	0.0924309	20.0296	3.04059e-89	2.22607e-87	ITIH2	-1.45074	0.191178	-7.58846	3.23728e-14	2.47147e-13
RSAD2	1.62672	0.138873	11.7137	1.08391e-31	1.24021e-30	SERP2	-1.21611	0.12592	-9.65778	4.55628e-22	6.22755e-21
MYCN	1.75568	0.181721	9.6614	4.39819e-22	3.30079e-21	ZNF385D	-1.30526	0.17703	-7.37309	1.66721e-13	1.1969e-12
LPIN1	-1.03766	0.105335	-9.85113	6.77808e-23	5.2699e-22	GABRA2	-2.61414	0.257339	-10.1583	3.04201e-24	4.8456e-23
CMPK2	1.34834	0.128009	10.5332	6.07504e-26	5.42793e-25	CCDC175	-3.23657	0.345654	-9.36362	7.70524e-21	9.66504e-20
SAA2	-2.78693	0.230394	-12.0964	1.10405e-33	1.37172e-32	GFRA1	-4.21062	0.20523	-20.5165	1.53224e-93	9.43222e-91
ANO3	-1.56367	0.242871	-6.43828	1.20834e-10	4.88235e-10	GLT1D1	1.01092	0.145405	6.95246	3.58974e-12	2.28768e-11
CFHR4	3.5111	0.568384	6.17733	6.51952e-10	2.50722e-09	TMEM132D	-1.43324	0.300071	-4.77633	1.7852e-06	6.33971e-06
TIMM17A	1.12448	0.0559817	20.0865	9.68373e-90	7.18618e-88	RBM46	1.80029	0.247792	7.26533	3.72122e-13	2.58783e-12
RAX	2.53789	0.37191	6.82393	8.85808e-12	3.86847e-11	SCHIP1	1.49852	0.123975	12.0873	1.23306e-33	3.53358e-32
ECHDC3	-1.42214	0.0945669	-15.0385	4.10797e-51	9.56357e-50	KCNE4	-2.95842	0.18948	-15.6134	5.90139e-55	5.66056e-53
EMP1	-1.864	0.0945162	-19.7215	1.40945e-86	9.60229e-85	CCDC74B	-2.39178	0.16574	-14.4309	3.30581e-47	2.09876e-45
SOX5	-1.72974	0.14717	-11.7534	6.78676e-32	7.83857e-31	TUBA3E	-3.09057	0.242347	-12.7526	3.01367e-37	1.06278e-35
SPX	-5.22863	0.230997	-22.6351	1.9567e-113	2.6011e-111	HSPB8	-1.52728	0.185693	-8.22477	1.95572e-16	1.78106e-15
LRP4	-1.37552	0.117209	-11.7357	8.36579e-32	9.62605e-31	TMEM178A	-1.12442	0.133933	-8.39533	4.64591e-17	4.44492e-16
RAB33A	1.03537	0.104679	9.89083	4.5623e-23	3.58351e-22	POU4F1	3.47035	0.378646	9.16516	4.94755e-20	5.85128e-19
SOX3	2.35356	0.414241	5.68164	1.33412e-08	4.6561e-08	G6PC2	-2.85636	0.325379	-8.77857	1.65571e-18	1.76112e-17
PIWIL4	-1.09212	0.109101	-10.0102	1.37462e-23	1.10628e-22	PDK1	1.00195	0.0876808	11.4273	3.05519e-30	7.09198e-29
MTNR1B	1.49486	0.510591	2.9277	0.0034148	0.00691903	TCF7L1	1.76149	0.120643	14.6008	2.77586e-48	1.87751e-46
SPOCD1	2.49191	0.147106	16.9396	2.29704e-64	7.92366e-63	FAM151B	-1.10425	0.071707	-15.3995	1.64963e-53	1.4666e-51
CDCA8	3.02583	0.111175	27.2168	4.1112e-163	1.653e-160	GUCY1A2	-1.33072	0.148347	-8.97037	2.95525e-19	3.31527e-18
DSC1	-2.60356	0.168208	-15.4782	4.86931e-54	1.23564e-52	SUV39H2	1.22426	0.0736571	16.6211	4.90352e-62	6.77452e-60
FHOD3	-1.41033	0.115416	-12.2196	2.44361e-34	3.11902e-33	OLAH	4.03681	0.239633	16.8458	1.12585e-63	1.68986e-61
GIF	1.89568	0.45078	4.20533	2.60697e-05	6.80631e-05	NMT2	1.14659	0.074031	15.488	4.17904e-54	3.83455e-52
FADS2	1.58609	0.173799	9.12597	7.1094e-20	4.80278e-19	ZSCAN1	-1.44023	0.203847	-7.06527	1.603e-12	1.05474e-11
C5AR2	1.49992	0.138727	10.812	3.0189e-27	2.85379e-26	TMEM123	1.15064	0.0878467	13.0983	3.36821e-39	1.34152e-37
PDGFRA	-1.38021	0.111974	-12.3262	6.54474e-35	8.54265e-34	SPEF2	-1.51781	0.091857	-16.5236	2.48103e-61	3.29659e-59
CLDN10	-1.0384	0.246136	-4.21881	2.45592e-05	6.43155e-05	MEPE	-1.66135	0.276143	-6.01627	1.78477e-09	8.80275e-09
ADAMTS8	-1.19091	0.178818	-6.65988	2.74045e-11	1.15843e-10	CAPSL	-2.93436	0.232959	-12.596	2.22035e-36	7.40081e-35
ACRV1	1.59531	0.13842	11.5251	9.85833e-31	1.08473e-29	GPD1L	-1.07397	0.0881551	-12.1827	3.84153e-34	1.13291e-32
KLB	-4.63071	0.145059	-31.923	1.2795e-223	3.3032e-220	GJA1	-1.92915	0.161728	-11.9284	8.42088e-33	2.28654e-31
NREP	1.19468	0.0784712	15.2244	2.43664e-52	5.87911e-51	CCNO	-1.74484	0.207793	-8.39701	4.57972e-17	4.38591e-16
ANXA1	-2.35155	0.105263	-22.3397	1.5214e-110	1.9086e-108	DDX4	1.2113	0.199182	6.08134	1.19179e-09	5.98122e-09
GOLM1	1.33266	0.0977103	13.6389	2.35155e-42	4.00793e-41	CLEC4F	1.66534	0.194256	8.57294	1.00877e-17	1.01212e-16
FAM189A2	-2.14398	0.149303	-14.3599	9.23276e-47	1.86373e-45	SLC16A12	-2.21781	0.210642	-10.5288	6.36323e-26	1.13643e-24
ADAM19	1.67842	0.0972044	17.2669	8.35509e-67	3.10011e-65	CNTNAP4	2.00188	0.26794	7.47139	7.9351e-14	5.86017e-13
SDS	2.30594	0.114624	20.1174	5.19499e-90	3.90237e-88	PART1	1.63236	0.235982	6.91731	4.60296e-12	2.9007e-11
MSI1	1.03422	0.177485	5.82706	5.64107e-09	2.02433e-08	RAB3C	-1.2488	0.203831	-6.12662	8.97646e-10	4.55435e-09
OASL	2.38957	0.14875	16.0643	4.53941e-58	1.3075e-56	LMNTD1	-1.06239	0.322645	-3.29274	0.000992144	0.00240559
RNFT2	2.10758	0.100956	20.8763	8.79967e-97	7.87667e-95	STK32B	-3.04526	0.164833	-18.4748	3.29621e-76	9.15989e-74
BICDL1	2.70216	0.0972629	27.782	7.1538e-170	3.3741e-167	ZIC1	2.96542	0.284981	10.4057	2.33566e-25	4.02214e-24
DTX1	-2.44308	0.109978	-22.2143	2.4975e-109	3.0249e-107	CPB1	-8.68368	0.379776	-22.8653	1.0295e-115	1.7881e-112
CD36	-4.15839	0.180764	-23.0045	4.2028e-117	6.1356e-115	BANK1	1.62515	0.177419	9.15999	5.19022e-20	6.13081e-19
UGT2A3	1.56301	0.480557	3.2525	0.00114394	0.00246574	ACMSD	-2.71425	0.230014	-11.8004	3.8851e-32	1.01579e-30
UGT2B28	-2.46658	0.372927	-6.61411	3.73786e-11	1.56589e-10	CLGN	-1.93915	0.186334	-10.4069	2.30671e-25	3.97371e-24
FAM71F1	2.06577	0.202618	10.1954	2.07901e-24	1.72934e-23	SYCP2L	1.58307	0.180653	8.76302	1.90096e-18	2.01407e-17
MDFIC	-1.23894	0.0760388	-16.2935	1.09781e-59	3.31587e-58	BMP6	1.92942	0.137911	13.9903	1.78679e-44	9.67633e-43
ADGRB3	-2.0548	0.152759	-13.4512	3.02799e-41	4.95427e-40	NR4A2	-1.02233	0.132945	-7.68987	1.47288e-14	1.1564e-13
NT5E	-1.26399	0.101928	-12.4007	2.59e-35	3.43364e-34	CCDC148	-1.02618	0.100459	-10.215	1.69949e-24	2.7586e-23
MRAP2	-1.02071	0.179163	-5.69709	1.21871e-08	4.26728e-08	ADGRF1	2.03942	0.248138	8.21888	2.05421e-16	1.86656e-15
LCA5	-1.24218	0.0809366	-15.3475	3.67948e-53	9.07419e-52	ADGRF4	1.31879	0.246421	5.35179	8.70904e-08	3.58589e-07
CGA	8.06849	0.39369	20.4945	2.40867e-93	1.96589e-91	FAM81B	-2.86173	0.22679	-12.6184	1.67152e-36	5.62934e-35
LMO2	-1.19741	0.0744511	-16.0831	3.35077e-58	9.7026e-57	PLEKHG4B	1.56209	0.167505	9.32563	1.10322e-20	1.36829e-19
ELF5	-1.11168	0.253839	-4.37946	1.18971e-05	3.21424e-05	C16orf89	-1.60003	0.22542	-7.09801	1.26569e-12	8.41103e-12
ITGA7	-3.63717	0.1297	-28.0429	4.8776e-173	2.6292e-170	CMTM7	1.68622	0.112651	14.9685	1.17983e-50	9.03567e-49
RDH5	-4.22862	0.135792	-31.1405	6.8292e-213	1.1964e-209	LURAP1L	-1.31768	0.136321	-9.66601	4.20433e-22	5.76109e-21
KRT85	1.3021	0.306237	4.25193	2.11935e-05	5.58827e-05	SPHKAP	3.38111	0.332411	10.1715	2.65884e-24	4.24776e-23
PPP1R1A	-3.85698	0.196718	-19.6066	1.35716e-85	9.08207e-84	KCNJ16	1.55307	0.273455	5.67944	1.35138e-08	6.06376e-08
TROAP	3.55567	0.11972	29.6999	7.6985e-194	7.4044e-191	FBXO36	-1.35604	0.0848703	-15.9777	1.8264e-57	2.00044e-55
B4GALNT1	1.22042	0.143598	8.49885	1.91475e-17	1.14428e-16	CLCA3P	1.1045	0.242275	4.55887	5.14286e-06	1.72747e-05
ESPL1	2.73081	0.107929	25.302	3.0367e-141	7.4479e-139	ANKFN1	-1.59289	0.235517	-6.76336	1.3483e-11	8.11801e-11
SLC26A10	-1.31776	0.126833	-10.3897	2.76105e-25	2.38989e-24	MSI2	-1.16695	0.0814597	-14.3255	1.51682e-46	9.24365e-45
KCNH3	-1.00756	0.163712	-6.15448	7.53242e-10	2.88139e-09	CHST9	1.43699	0.229279	6.26742	3.67069e-10	1.93297e-09
PKIB	1.7997	0.145947	12.3312	6.15197e-35	8.04067e-34	DNAAF1	-2.25368	0.139779	-16.1231	1.75505e-58	2.01773e-56
STX11	-2.12669	0.104882	-20.277	2.05277e-91	1.59829e-89	UBASH3B	1.97041	0.11056	17.822	4.76687e-71	1.02122e-68
EGR4	1.42202	0.238334	5.9665	2.42403e-09	8.96438e-09	RETREG1	-2.12089	0.134516	-15.7668	5.26348e-56	5.3438e-54
EMX1	3.62143	0.238945	15.1559	6.92391e-52	1.6495e-50	CDH12	1.41238	0.285104	4.95389	7.27439e-07	2.70315e-06
CPM	-2.06746	0.111646	-18.518	1.47733e-76	7.49391e-75	GPR15	1.09586	0.242797	4.51348	6.3772e-06	2.11562e-05
AGT	1.48672	0.195871	7.5903	3.19173e-14	1.60823e-13	ANGPT1	1.38952	0.1356	10.2472	1.21826e-24	1.99277e-23
ZNF670-ZNF695	1.91479	0.134866	14.1977	9.46817e-46	1.84226e-44	CYP4Z2P	-1.33893	0.244794	-5.46959	4.51076e-08	1.92086e-07
KCNK1	1.91406	0.155708	12.2926	9.92117e-35	1.28574e-33	CERS3	1.75658	0.207629	8.46019	2.66941e-17	2.60309e-16
CAPN9	2.67899	0.171515	15.6195	5.35992e-55	1.40822e-53	PRKCA	1.18949	0.10436	11.398	4.28036e-30	9.86064e-29
RGS8	2.23698	0.175991	12.7108	5.15146e-37	7.27163e-36	GAL3ST2	-1.64527	0.252206	-6.5235	6.86847e-11	3.88351e-10
KIAA1614	-1.13757	0.0821463	-13.8481	1.30575e-43	2.34013e-42	ENPP3	2.03745	0.203256	10.024	1.19531e-23	1.82796e-22
LAMC1	-1.14119	0.079193	-14.4102	4.46328e-47	9.13743e-46	UCHL1	2.47166	0.157586	15.6846	1.92856e-55	1.90626e-53
CHRND	1.64442	0.359772	4.57073	4.86034e-06	1.36071e-05	PGM5	-1.19201	0.148121	-8.04756	8.44578e-16	7.31612e-15
PAX3	-1.5395	0.208048	-7.39973	1.36465e-13	6.63153e-13	GBP5	1.84061	0.167228	11.0066	3.55262e-28	7.32377e-27
SLC19A3	-4.96157	0.206822	-23.9896	3.5732e-127	6.8735e-125	GPR26	-1.21933	0.318993	-3.82243	0.000132143	0.000366638
TMBIM1	-1.10539	0.0621471	-17.7866	8.97479e-71	3.75624e-69	CCDC173	-1.54381	0.118336	-13.046	6.70127e-39	2.61548e-37
EDAR	-1.68457	0.239954	-7.02038	2.21268e-12	1.00246e-11	C10orf90	3.11674	0.216293	14.4098	4.48936e-47	2.80259e-45
ARHGEF4	-1.2222	0.140167	-8.71958	2.79236e-18	1.73777e-17	MAGED4	1.35225	0.23483	5.75841	8.49084e-09	3.88885e-08
STAB2	-2.88312	0.157253	-18.3343	4.40681e-75	2.14235e-73	SRSF12	3.13375	0.148341	21.1253	4.6531e-99	3.83534e-96
USP44	-2.23884	0.131751	-16.993	9.25097e-65	3.24359e-63	PSMA8	2.6601	0.265077	10.0352	1.06741e-23	1.63751e-22
PCDH8	1.12678	0.276276	4.07847	4.53334e-05	0.000115307	CXADR	1.0746	0.140741	7.63532	2.25254e-14	1.74321e-13
CKAP2	1.38296	0.076659	18.0404	9.38327e-73	4.1957e-71	BTG3	1.42445	0.108353	13.1463	1.78609e-39	7.23829e-38
TBC1D4	-1.17468	0.0807979	-14.5385	6.90611e-48	1.44583e-46	CHODL	3.15194	0.200217	15.7426	7.72419e-56	7.80946e-54
THSD1	-1.46936	0.0752584	-19.5243	6.83101e-85	4.46766e-83	TMPRSS15	2.0975	0.393902	5.32493	1.00992e-07	4.12996e-07
SPRY2	-2.46564	0.103238	-23.8831	4.5912e-126	8.4985e-124	NCAM2	-3.53969	0.177142	-19.9821	7.8764e-89	3.98997e-86
EDNRB	-2.17252	0.11007	-19.7377	1.02359e-86	7.04195e-85	L3MBTL4	2.07266	0.138313	14.9853	9.15567e-51	7.04508e-49
RCBTB2	-1.17586	0.0606726	-19.3804	1.12989e-83	7.10559e-82	PDE1C	1.61738	0.159701	10.1276	4.16782e-24	6.5679e-23
IGF2BP3	2.20956	0.238615	9.25994	2.04547e-20	1.41775e-19	SLFN13	1.12092	0.155359	7.21499	5.39362e-13	3.68809e-12
IL6	-2.73508	0.19524	-14.0088	1.37703e-44	2.56926e-43	SKA1	1.3499	0.120536	11.1992	4.11376e-29	8.97114e-28
DGKB	-1.05519	0.153963	-6.85356	7.20325e-12	3.1621e-11	PIEZO2	-1.65204	0.172769	-9.56214	1.15347e-21	1.53096e-20
NACAD	-1.26252	0.124968	-10.1028	5.37122e-24	4.39116e-23	CCDC144CP	1.223	0.196646	6.21927	4.99471e-10	2.59756e-09
C7orf69	-1.34612	0.252443	-5.33235	9.69505e-08	3.1465e-07	RAB6B	1.25738	0.122152	10.2935	7.53549e-25	1.24858e-23
MYO1G	1.13142	0.109839	10.3008	6.99037e-25	5.94369e-24	EPHB1	2.22624	0.138386	16.0871	3.14138e-58	3.52814e-56
TTYH3	1.26946	0.0820413	15.4734	5.2464e-54	1.32927e-52	CA10	-1.48547	0.397299	-3.73892	0.000184809	0.000502401
ABHD17C	1.3755	0.0890795	15.4413	8.63726e-54	2.16935e-52	PTPRN2	-2.87651	0.197718	-14.5486	5.96435e-48	3.98423e-46
ALPK3	-2.57389	0.103472	-24.8752	1.3806e-136	3.1065e-134	PPM1J	-1.28615	0.126768	-10.1457	3.46257e-24	5.49032e-23
CHAD	1.49929	0.219998	6.81505	9.42318e-12	4.10977e-11	SLC16A1	1.40158	0.125045	11.2086	3.69933e-29	8.09642e-28
LIMD2	1.65408	0.122632	13.4882	1.83637e-41	3.02884e-40	GRIA1	-4.30384	0.301794	-14.2609	3.83608e-46	2.27226e-44
BRIP1	2.18169	0.111789	19.5161	8.00479e-85	5.22142e-83	XAGE2	8.28204	0.470693	17.5954	2.67111e-69	5.21682e-67
SCN2A	-2.32588	0.184071	-12.6358	1.34099e-36	1.86976e-35	FZD7	1.27616	0.105315	12.1176	8.52596e-34	2.46948e-32
TBR1	2.15282	0.319873	6.73022	1.69403e-11	7.26676e-11	SPAG17	-2.06042	0.206198	-9.99244	1.64474e-23	2.48556e-22
ERMN	2.59889	0.158439	16.4031	1.81844e-60	5.617e-59	SLC24A2	-1.80675	0.160791	-11.2367	2.69338e-29	5.94292e-28
GALNT5	1.67699	0.178942	9.37169	7.13822e-21	5.0555e-20	RMND1	-1.4948	0.120726	-12.3817	3.28199e-35	1.02443e-33
SCN7A	-1.62185	0.192149	-8.44059	3.15752e-17	1.86673e-16	RAET1L	2.66216	0.2809	9.47726	2.61043e-21	3.36196e-20
BLK	1.63237	0.214974	7.59336	3.11711e-14	1.57224e-13	AFF2	1.83051	0.147809	12.3843	3.17839e-35	9.94007e-34
GATA4	4.57686	0.37823	12.1007	1.04673e-33	1.30117e-32	NAT2	-1.18499	0.208018	-5.69655	1.22257e-08	5.50661e-08
IL36G	1.07251	0.30342	3.53475	0.000408168	0.000930279	PSD3	-1.67203	0.161438	-10.3571	3.88418e-25	6.59767e-24
IL36RN	2.56217	0.335286	7.64175	2.14282e-14	1.09193e-13	CFAP70	-1.45128	0.121094	-11.9847	4.27388e-33	1.17959e-31
CFC1	1.48471	0.659534	2.25115	0.0243758	0.0434256	GNA14	-1.32163	0.149352	-8.84909	8.82386e-19	9.61921e-18
BIN1	-1.64627	0.11262	-14.6179	2.15929e-48	4.58518e-47	FAM161B	-1.26771	0.0896454	-14.1413	2.11203e-45	1.19153e-43
GYPC	-1.94304	0.0952645	-20.3962	1.80565e-92	1.44018e-90	WIF1	1.43386	0.342452	4.18704	2.82622e-05	8.62895e-05
DNAJC1	1.53482	0.102577	14.9627	1.28793e-50	2.94799e-49	UGT2B4	-6.11328	0.3927	-15.5673	1.21462e-54	1.15142e-52
KLF4	-2.55124	0.112707	-22.636	1.9174e-113	2.5558e-111	ADAMTS3	1.57389	0.119912	13.1254	2.35503e-39	9.46508e-38
OR1J1	1.41812	0.313379	4.52526	6.03202e-06	1.67468e-05	ALX3	2.74371	0.283192	9.6885	3.37445e-22	4.65936e-21
TMOD1	-2.76593	0.156923	-17.626	1.55636e-69	6.23205e-68	ART3	4.98103	0.298881	16.6656	2.33113e-62	3.26701e-60
DAB2IP	-1.11309	0.0658728	-16.8976	4.68909e-64	1.60509e-62	SLC28A1	2.94042	0.187887	15.6499	3.32695e-55	3.25539e-53
STXBP1	-1.19656	0.086763	-13.7911	2.88433e-43	5.11319e-42	CLDN8	1.84219	0.21146	8.71176	2.99197e-18	3.13313e-17
ANGPTL2	-1.83662	0.101506	-18.0936	3.57928e-73	1.6317e-71	SFXN2	-1.00586	0.100593	-9.99929	1.535e-23	2.32623e-22
TLR4	-1.47361	0.0939092	-15.6919	1.71805e-55	4.59508e-54	HKDC1	1.71281	0.197951	8.6527	5.02932e-18	5.1895e-17
KIF12	1.14018	0.170716	6.67881	2.4089e-11	1.02163e-10	LRFN2	-1.21184	0.177637	-6.82199	8.97892e-12	5.49942e-11
DPM2	1.01581	0.0612951	16.5725	1.10162e-61	3.51574e-60	KAT6B	-1.38965	0.103673	-13.4042	5.71726e-41	2.51844e-39
WDR38	2.59979	0.238897	10.8825	1.3969e-27	1.34118e-26	RAB11FIP1	-1.27487	0.151743	-8.4015	4.40811e-17	4.22822e-16
GABBR2	3.18252	0.306116	10.3964	2.57353e-25	2.23073e-24	GLYATL2	1.21813	0.279881	4.3523	1.34715e-05	4.29566e-05
ENPP2	-2.72611	0.125313	-21.7544	6.2788e-105	6.9055e-103	MS4A1	1.91882	0.237464	8.08045	6.45283e-16	5.64097e-15
DSCC1	1.51	0.104433	14.4591	2.19681e-47	4.541e-46	FBXO32	1.20651	0.110021	10.9662	5.5559e-28	1.13334e-26
NOV	-1.52209	0.129415	-11.7613	6.17984e-32	7.14769e-31	ZIC3	1.33437	0.403817	3.3044	0.000951783	0.00231628
IL33	-2.6653	0.164325	-16.2197	3.66135e-59	1.08912e-57	LHFPL4	-1.34889	0.267235	-5.04759	4.47421e-07	1.70321e-06
IL11RA	-1.47303	0.0838254	-17.5725	3.99838e-69	1.58809e-67	B3GNT7	2.3326	0.135793	17.1776	3.90865e-66	6.55454e-64
CCL21	-2.31305	0.210318	-10.9979	3.91189e-28	3.85623e-27	SST	3.78373	0.466112	8.11765	4.75293e-16	4.20254e-15
DMRT1	3.12766	0.378847	8.25574	1.50962e-16	8.62852e-16	GHRL	1.41295	0.127766	11.0589	1.98557e-28	4.15492e-27
CD72	1.02468	0.108191	9.47101	2.77156e-21	2.00045e-20	SHCBP1L	1.8342	0.282981	6.48171	9.06915e-11	5.07119e-10
ARHGEF39	1.76667	0.0943363	18.7274	2.96145e-78	1.57384e-76	ATP2B2	1.99479	0.228705	8.7221	2.73088e-18	2.86651e-17
IGFBPL1	2.43335	0.202115	12.0394	2.20499e-33	2.70669e-32	TMEM171	2.38549	0.1801	13.2454	4.7995e-40	2.01037e-38
SLC22A7	1.50897	0.268602	5.61787	1.93329e-08	6.67266e-08	TIMP4	-1.40443	0.208794	-6.72638	1.7394e-11	1.03625e-10
TMEM63B	1.30597	0.0608271	21.4701	2.9615e-102	3.0454e-100	LRP8	1.39917	0.118604	11.797	4.04558e-32	1.05604e-30
CAPN11	-2.33254	0.13666	-17.0682	2.55831e-65	9.14653e-64	STEAP2	-1.64208	0.147789	-11.111	1.10924e-28	2.35663e-27
HCRTR2	1.19799	0.360367	3.32438	0.000886159	0.00193802	SUSD3	-3.17826	0.163443	-19.4457	3.16618e-84	1.25183e-81
KIAA0319	2.42023	0.2095	11.5524	7.17716e-31	7.94346e-30	C1orf158	-1.99416	0.331977	-6.00693	1.89064e-09	9.2929e-09
GCM1	1.40468	0.199352	7.04622	1.83846e-12	8.36861e-12	IL34	2.20559	0.14333	15.3882	1.96379e-53	1.73954e-51
UQCC2	1.18493	0.0743395	15.9395	3.37084e-57	9.47001e-56	CACNA1D	-2.15009	0.136773	-15.7201	1.10153e-55	1.10223e-53
HMGA1	1.57029	0.0990519	15.8532	1.33531e-56	3.69637e-55	KIT	1.0692	0.16972	6.2998	2.98035e-10	1.5835e-09
TCF19	1.24782	0.0907892	13.7442	5.51896e-43	9.66497e-42	CCNB2	1.25876	0.113119	11.1277	9.19437e-29	1.96041e-27
IER3	1.2616	0.118129	10.6798	1.26478e-26	1.16202e-25	FAM81A	1.22498	0.12133	10.0963	5.73505e-24	8.96212e-23
CLPS	3.06616	0.233227	13.1467	1.778e-39	2.74087e-38	MUM1L1	-2.25709	0.189125	-11.9344	7.83472e-33	2.13451e-31
FGFBP1	-1.37673	0.344576	-3.99544	6.45742e-05	0.000161473	CREB3L1	-1.30495	0.132093	-9.87904	5.13225e-23	7.44812e-22
FGFBP2	-2.95735	0.236179	-12.5217	5.6839e-36	7.73819e-35	SVOPL	1.33963	0.177584	7.54364	4.57037e-14	3.44432e-13
FHDC1	1.0499	0.0845352	12.4196	2.04481e-35	2.7219e-34	SNX22	1.41056	0.136929	10.3014	6.94405e-25	1.15452e-23
MGARP	-2.29685	0.119251	-19.2607	1.14854e-82	6.92967e-81	SLC34A2	2.22319	0.26922	8.25787	1.48294e-16	1.36121e-15
PI15	-1.03356	0.258433	-3.99933	6.35212e-05	0.000158988	ACAN	1.48293	0.15702	9.44422	3.58065e-21	4.57998e-20
TTPA	-1.29156	0.183038	-7.05626	1.71042e-12	7.80607e-12	FMNL2	1.23009	0.0893357	13.7693	3.89802e-43	1.94825e-41
GGH	1.54494	0.129112	11.9659	5.35885e-33	6.49845e-32	GAREM2	1.04253	0.0920177	11.3297	9.35602e-30	2.11822e-28
SLCO5A1	2.14726	0.172002	12.4839	9.14e-36	1.23406e-34	DPYSL5	2.60599	0.390299	6.6769	2.44056e-11	1.43355e-10
SULF1	1.87921	0.114424	16.4232	1.30476e-60	4.04558e-59	DRC1	-1.56051	0.202229	-7.71652	1.19546e-14	9.44538e-14
NXPE4	-1.63318	0.19945	-8.18842	2.64679e-16	1.49868e-15	CIB4	1.98138	0.277924	7.12922	1.00942e-12	6.7588e-12
TMPRSS4	2.6886	0.249309	10.7842	4.08723e-27	3.83927e-26	EXTL1	2.50971	0.183057	13.71	8.84865e-43	4.31613e-41
TRPC6	-1.34426	0.0909188	-14.7853	1.82347e-49	4.01458e-48	DUSP2	1.01244	0.118625	8.53473	1.40483e-17	1.39369e-16
MMP27	-2.51047	0.190023	-13.2114	7.53678e-40	1.17587e-38	GRHL3	1.32731	0.140431	9.45165	3.33531e-21	4.27742e-20
YAP1	-1.08637	0.06993	-15.5351	2.00755e-54	5.16655e-53	GALNT14	1.05888	0.176161	6.01086	1.84547e-09	9.08556e-09
TRIM29	-1.70689	0.1989	-8.58165	9.35188e-18	5.68155e-17	HPD	1.35221	0.144723	9.3434	9.32918e-21	1.1633e-19
BTG4	1.30567	0.295044	4.42533	9.62935e-06	2.62411e-05	XDH	1.9827	0.186635	10.6234	2.31918e-26	4.25761e-25
PPP2R1B	-1.46795	0.0710947	-20.6478	1.02185e-94	8.68697e-93	TMSB15A	2.67472	0.185157	14.4456	2.67079e-47	1.70674e-45
ARHGAP20	-3.05993	0.112665	-27.1596	1.9525e-162	7.7865e-160	MRAS	1.62925	0.0886666	18.375	2.08139e-75	5.41285e-73
FXYD2	-1.37918	0.129993	-10.6096	2.68777e-26	2.43878e-25	ESYT3	2.31746	0.148337	15.623	5.07869e-55	4.91017e-53
MMP13	6.04144	0.202687	29.8067	3.1945e-195	3.2645e-192	CLSTN2	-4.05831	0.183399	-22.1282	1.6905e-108	2.2219e-105
UNC13C	-2.13907	0.189026	-11.3163	1.08997e-29	1.14831e-28	COLEC12	-1.14867	0.134447	-8.54369	1.30003e-17	1.29314e-16
NUSAP1	3.05012	0.101197	30.1406	1.4263e-199	1.5901e-196	RHBDL2	1.41255	0.0964313	14.6483	1.38176e-48	9.491e-47
KIF23	2.62437	0.0988684	26.5441	3.0073e-155	1.0035e-152	HIST1H2BD	-1.14791	0.127872	-8.97709	2.78034e-19	3.12554e-18
KNL1	2.83256	0.106133	26.6888	6.3469e-157	2.1471e-154	RIBC1	-1.08093	0.102534	-10.5422	5.51857e-26	9.89942e-25
PAQR5	1.17015	0.126468	9.25251	2.19279e-20	1.51901e-19	TMSB15B	1.91705	0.13293	14.4215	3.79259e-47	2.38291e-45
ITPKA	3.33817	0.171675	19.4447	3.22984e-84	2.06021e-82	CATIP	-1.89953	0.16899	-11.2405	2.57959e-29	5.69701e-28
STRA6	1.22951	0.116458	10.5576	4.68674e-26	4.20974e-25	KCNB1	1.27724	0.197661	6.46177	1.03487e-10	5.75227e-10
SEMA6D	-1.66841	0.150595	-11.0788	1.58997e-28	1.59622e-27	TSPAN33	1.50315	0.0908984	16.5365	2.00182e-61	2.68183e-59
GCOM1	-1.56549	0.148654	-10.5311	6.21161e-26	5.54691e-25	NRG2	1.6949	0.185594	9.1323	6.70619e-20	7.86421e-19
BRDT	1.70051	0.255503	6.65553	2.82273e-11	1.19208e-10	CD1A	1.16969	0.234054	4.99752	5.80731e-07	2.18216e-06
GIPC2	-2.64443	0.125037	-21.1492	2.8095e-99	2.70218e-97	CD1B	1.43749	0.228511	6.2907	3.1604e-10	1.67568e-09
IFI44	1.07125	0.13117	8.1669	3.16413e-16	1.78317e-15	CPA2	2.40364	0.202625	11.8625	1.85321e-32	4.94097e-31
CGREF1	1.00766	0.124756	8.07706	6.6349e-16	3.67414e-15	CPA5	1.37	0.18446	7.42709	1.11012e-13	8.09754e-13
LHCGR	-4.47049	0.287034	-15.5748	1.08011e-54	2.81367e-53	POM121L2	2.6194	0.27917	9.38281	6.42394e-21	8.10594e-20
SIX3	2.99778	0.266808	11.2357	2.72311e-29	2.81683e-28	DYNC1I1	1.65169	0.141445	11.6772	1.66624e-31	4.14329e-30
CENPO	1.27103	0.0706367	17.9939	2.17338e-72	9.59575e-71	PKD1L1	-1.09621	0.118522	-9.24895	2.26699e-20	2.74653e-19
LOXL4	-1.51934	0.177194	-8.57442	9.95875e-18	6.04126e-17	SLC45A3	1.31829	0.110292	11.9527	6.28418e-33	1.72075e-31
CH25H	-1.13663	0.131915	-8.61637	6.91103e-18	4.22482e-17	HTR6	1.84616	0.232272	7.94825	1.89166e-15	1.59213e-14
LBX1	2.80727	0.518758	5.41153	6.24889e-08	2.06161e-07	NPM2	2.21446	0.162168	13.6554	1.87538e-42	8.99426e-41
KIF11	2.51953	0.0951663	26.4751	1.8781e-154	6.101e-152	FGF17	1.2085	0.20392	5.92634	3.09762e-09	1.48913e-08
CEP55	3.43832	0.117849	29.1757	3.9501e-187	3.0275e-184	VWA5B1	-1.41818	0.237017	-5.98346	2.18452e-09	1.06619e-08
RBP4	-4.81107	0.211708	-22.7251	2.5326e-114	3.4895e-112	APOA2	1.87782	0.287053	6.54171	6.08187e-11	3.45644e-10
OIT3	1.81517	0.159623	11.3716	5.79252e-30	6.19029e-29	MPZ	3.59112	0.161204	22.2768	6.2049e-110	8.6215e-107
ADAMTS14	3.04078	0.121616	25.0032	5.644e-138	1.2877e-135	WFDC8	2.0038	0.372801	5.375	7.65842e-08	3.174e-07
DNA2	1.7273	0.0892516	19.3532	1.91685e-83	1.18869e-81	LAD1	1.46447	0.14676	9.97865	1.89026e-23	2.84422e-22
AOX1	-2.17876	0.162691	-13.3921	6.72679e-41	1.08791e-39	STC1	-1.31712	0.168104	-7.83516	4.68236e-15	3.82252e-14
BARD1	1.17036	0.071901	16.2774	1.42729e-59	4.29781e-58	RCAN1	1.22604	0.123476	9.92933	3.10329e-23	4.58015e-22
MSTN	-1.25953	0.16354	-7.70168	1.3429e-14	6.91498e-14	CLIC6	-3.1994	0.253811	-12.6054	1.97127e-36	6.59772e-35
CHRNA1	1.45813	0.154174	9.45767	3.14871e-21	2.267e-20	GIP	-1.05059	0.285676	-3.67756	0.00023548	0.000631186
PARP9	1.03872	0.0784075	13.2477	4.65415e-40	7.31716e-39	GJD2	2.82042	0.673509	4.18764	2.81865e-05	8.60693e-05
HCN4	1.19665	0.217508	5.50165	3.76243e-08	1.26702e-07	SCUBE1	-2.5322	0.201828	-12.5463	4.1633e-36	1.36065e-34
SEMA7A	1.3247	0.0942084	14.0614	6.55502e-45	1.23811e-43	IRX6	1.48013	0.198985	7.4384	1.01915e-13	7.45635e-13
ARHGAP24	-1.27392	0.0821698	-15.5035	3.28276e-54	8.3955e-53	BTG2	-1.78153	0.122119	-14.5884	3.32829e-48	2.24491e-46
FAM13A	-2.44128	0.0872298	-27.9867	2.3558e-172	1.2164e-169	CELF3	-2.77133	0.255986	-10.8261	2.5897e-27	5.04163e-26
PCDH10	1.80563	0.269535	6.69904	2.09788e-11	8.93963e-11	TGM7	2.14878	0.277537	7.74231	9.76297e-15	7.76423e-14
NDST4	4.22066	0.42599	9.90788	3.84709e-23	3.03584e-22	SPRR2G	1.99321	0.614152	3.24546	0.00117261	0.00281065
FGF5	3.36089	0.264787	12.6928	6.48377e-37	9.13126e-36	PGLYRP3	2.9239	0.472054	6.19399	5.86611e-10	3.02807e-09
GPAT3	-1.73692	0.127203	-13.6547	1.89353e-42	3.24306e-41	ISL2	1.53323	0.281382	5.44894	5.06711e-08	2.14464e-07
IL21	3.4263	0.362365	9.45538	3.21844e-21	2.31652e-20	ADGRG5	1.02864	0.150475	6.83599	8.14421e-12	5.0052e-11
FGF2	-2.73147	0.157814	-17.3082	4.08082e-67	1.52803e-65	TEPP	1.23428	0.207384	5.95164	2.65468e-09	1.28521e-08
BMPR1B	4.22464	0.25104	16.8286	1.5064e-63	5.07151e-62	UROC1	2.23141	0.2063	10.8163	2.88047e-27	5.58978e-26
MMRN1	-3.3129	0.17462	-18.9721	2.90247e-80	1.64023e-78	TPPP3	-1.3736	0.143192	-9.59277	8.57525e-22	1.14882e-20
PRDM5	-1.38335	0.089687	-15.4242	1.12488e-53	2.81663e-52	CARMIL2	1.57385	0.156266	10.0716	7.37695e-24	1.14506e-22
CXCL9	3.25796	0.192134	16.9567	1.71712e-64	5.95675e-63	PIP	-1.08969	0.302795	-3.59877	0.000319723	0.000838462
CDKL2	-1.10538	0.19679	-5.61706	1.94239e-08	6.70358e-08	FAM131B	-1.56287	0.158115	-9.88437	4.86627e-23	7.07056e-22
ANXA3	-1.24262	0.143671	-8.64904	5.19324e-18	3.18902e-17	LYPD5	2.24578	0.116695	19.2449	1.55887e-82	5.41496e-80
CENPE	2.62429	0.108808	24.1185	1.6003e-128	3.1273e-126	TNFRSF13C	1.55498	0.172099	9.03538	1.63427e-19	1.8709e-18
LEF1	2.01459	0.118239	17.0383	4.26806e-65	1.51379e-63	OR3A3	1.07114	0.414528	2.584	0.00976614	0.0199579
HADH	-1.30049	0.0634012	-20.512	1.68241e-93	1.37772e-91	CPAMD8	1.28657	0.159361	8.07326	6.84447e-16	5.97154e-15
EGF	-1.37805	0.173736	-7.93185	2.15902e-15	1.16263e-14	ANKLE1	2.00265	0.143695	13.9368	3.78769e-44	2.02639e-42
FBN2	2.91215	0.164359	17.7182	3.03276e-70	1.25116e-68	ABCG1	-1.01768	0.0886613	-11.4783	1.6952e-30	3.98835e-29
SHISAL1	1.70511	0.16022	10.6423	1.89333e-26	1.72464e-25	TFF3	-4.50431	0.216529	-20.8023	4.12179e-96	2.86353e-93
B4GALNT3	1.73669	0.138876	12.5053	6.9835e-36	9.49168e-35	TFF2	1.71977	0.327207	5.25592	1.47286e-07	5.92394e-07
ERP27	1.61264	0.15028	10.7309	7.2873e-27	6.77386e-26	TFF1	-6.36391	0.265158	-24.0004	2.7538e-127	7.44e-124
GABARAPL1	-1.49901	0.069054	-21.7078	1.7324e-104	1.8843e-102	RSPH1	-1.97789	0.124898	-15.8361	1.75473e-56	1.82728e-54
CPNE8	-1.05354	0.0980543	-10.7444	6.29433e-27	5.87088e-26	PDE9A	2.18637	0.125402	17.4349	4.48081e-68	8.04082e-66
FGD4	-1.18116	0.079395	-14.8771	4.64482e-50	1.04465e-48	CBS	1.60023	0.201446	7.94373	1.96185e-15	1.64864e-14
PIK3C2G	-2.63885	0.201973	-13.0653	5.19729e-39	7.87816e-38	PDXK	1.14764	0.0738647	15.5371	1.94575e-54	1.83024e-52
PLCZ1	-3.03837	0.245783	-12.362	4.19419e-35	5.50973e-34	CSTB	1.46743	0.0947322	15.4903	4.03371e-54	3.70819e-52
SLCO1C1	-2.00071	0.11695	-17.1073	1.30884e-65	4.72069e-64	RRP1	1.03527	0.0833888	12.4149	2.16887e-35	6.8048e-34
CD27	1.09993	0.150474	7.30973	2.67688e-13	1.27643e-12	AIRE	1.20208	0.192683	6.23863	4.41426e-10	2.30927e-09
COL2A1	3.57312	0.299276	11.9392	7.3929e-33	8.89688e-32	FTCD	2.89617	0.19048	15.2045	3.29942e-52	2.72418e-50
LRIG3	-1.44324	0.101214	-14.2593	3.92472e-46	7.75646e-45	S100B	3.1998	0.196944	16.2473	2.33442e-59	2.83105e-57
TPH2	1.10828	0.280564	3.95018	7.8094e-05	0.000193282	SLC2A6	1.29484	0.120769	10.7216	8.05751e-27	1.52114e-25
PTPRQ	-2.07278	0.278624	-7.43934	1.01191e-13	4.95619e-13	C9orf116	-1.74394	0.105527	-16.526	2.38354e-61	3.17573e-59
DUSP6	-1.45315	0.100651	-14.4375	3.00543e-47	6.18641e-46	SPTBN4	-2.14646	0.141945	-15.1217	1.16425e-51	9.35842e-50
ASCL1	5.9961	0.382284	15.685	1.91676e-55	5.11817e-54	COX6B2	-1.4594	0.218137	-6.69031	2.22692e-11	1.31349e-10
GAS2L3	1.31049	0.0931201	14.0731	5.55449e-45	1.05197e-43	S100A1	2.42959	0.208323	11.6626	1.97912e-31	4.89804e-30
SDSL	1.20504	0.0901877	13.3615	1.01521e-40	1.62951e-39	CXCR5	1.4935	0.214179	6.97314	3.09937e-12	1.98768e-11
FAM222A	1.18723	0.106773	11.1192	1.01154e-28	1.02453e-27	CHRNB2	-1.19136	0.213398	-5.58281	2.36661e-08	1.03583e-07
FOXN4	1.11882	0.259248	4.31563	1.59148e-05	4.24913e-05	FCRL3	1.26572	0.20375	6.21216	5.22621e-10	2.71157e-09
PDX1	4.26445	0.593566	7.18446	6.74711e-13	3.15109e-12	LY6K	1.98588	0.233462	8.50621	1.79705e-17	1.77267e-16
RDH16	2.68386	0.172928	15.5201	2.53715e-54	6.51242e-53	LY6E	1.1293	0.127073	8.88699	6.27877e-19	6.91604e-18
ACVRL1	-1.09827	0.0716157	-15.3356	4.42416e-53	1.08724e-51	COL26A1	3.14973	0.18831	16.7263	8.42857e-63	1.21269e-60
GPR84	1.91143	0.126638	15.0936	1.78401e-51	4.20718e-50	SH2B2	1.18167	0.0954462	12.3805	3.33265e-35	1.03958e-33
N4BP2L1	-1.29461	0.0756309	-17.1174	1.09996e-65	3.97605e-64	PGLYRP2	-4.47338	0.242653	-18.4353	6.84865e-76	1.85032e-73
CELA1	1.58373	0.252793	6.26492	3.73024e-10	1.45972e-09	FBXL13	1.47796	0.135847	10.8796	1.44175e-27	2.86063e-26
BRCA2	1.5435	0.0942676	16.3736	2.95042e-60	9.04526e-59	DMKN	1.69962	0.184708	9.20166	3.52447e-20	4.21957e-19
GALNT6	1.58381	0.131812	12.0157	2.93771e-33	3.58817e-32	PGAP3	-1.84459	0.150529	-12.254	1.59817e-34	4.82136e-33
ESYT1	-1.04617	0.0520061	-20.1162	5.31883e-90	3.98319e-88	DCD	-1.69089	0.49424	-3.4212	0.000623466	0.00156408
LPAR6	-1.06922	0.0680273	-15.7175	1.14765e-55	3.09481e-54	ZNF385A	-1.46517	0.0935816	-15.6566	2.99356e-55	2.93508e-53
MORN3	1.62185	0.116775	13.8886	7.4276e-44	1.34343e-42	CD300LG	-1.13873	0.237718	-4.79025	1.66576e-06	5.93503e-06
RHOF	1.27322	0.101567	12.5357	4.7619e-36	6.49919e-35	IZUMO2	1.13257	0.256058	4.42312	9.72876e-06	3.15545e-05
DIAPH3	2.28549	0.115903	19.7189	1.48275e-86	1.00876e-84	NAGS	-1.29422	0.13701	-9.44615	3.51521e-21	4.50219e-20
MBNL2	-1.09013	0.082141	-13.2715	3.3887e-40	5.34821e-39	ASB16	-1.28349	0.112482	-11.4107	3.69943e-30	8.56293e-29
RNF113B	1.95878	0.344913	5.67905	1.35443e-08	4.72529e-08	SHANK1	-1.00061	0.140428	-7.12543	1.03753e-12	6.94032e-12
ZIC5	3.00816	0.398437	7.5499	4.35607e-14	2.18012e-13	FAM171A2	1.10351	0.138584	7.96278	1.68213e-15	1.42094e-14
GRTP1	1.08491	0.0760999	14.2564	4.09057e-46	8.08097e-45	AQP5	3.0756	0.291036	10.5678	4.20396e-26	7.6086e-25
SSTR1	-2.32193	0.174871	-13.278	3.10722e-40	4.91663e-39	KRT84	2.50755	0.280316	8.94546	3.70414e-19	4.13156e-18
REM2	1.79579	0.123772	14.5088	1.06591e-47	2.22205e-46	KRT82	1.58014	0.318585	4.95986	7.05435e-07	2.62519e-06
MDGA2	1.7002	0.322484	5.2722	1.34795e-07	4.32382e-07	CCDC78	-1.41572	0.157773	-8.97309	2.883e-19	3.23795e-18
PELI2	-1.69788	0.104314	-16.2766	1.44666e-59	4.35348e-58	SSTR5	-2.51462	0.371124	-6.7757	1.23806e-11	7.48482e-11
ESR2	-2.00917	0.10965	-18.3234	5.38014e-75	2.60007e-73	MEIOB	1.44658	0.223011	6.48658	8.78073e-11	4.91784e-10
KCNH5	-1.73053	0.350535	-4.93682	7.94058e-07	2.39237e-06	ADCY9	-1.27565	0.0869737	-14.6671	1.04788e-48	7.23856e-47
FAM181A	-2.01242	0.268354	-7.49912	6.42464e-14	3.1826e-13	GNG3	-1.0167	0.153111	-6.64029	3.13065e-11	1.82267e-10
SLC24A4	-1.122	0.115729	-9.69502	3.16575e-22	2.38829e-21	FGF19	-1.50002	0.275437	-5.44595	5.15291e-08	2.17906e-07
FBLN5	-1.78773	0.110442	-16.187	6.2284e-59	1.83713e-57	CYP4A22	-2.97585	0.274199	-10.8529	1.93225e-27	3.80435e-26
SLC25A47	1.62657	0.257401	6.31919	2.62937e-10	1.03963e-09	PDZK1IP1	1.45596	0.194926	7.46933	8.06039e-14	5.95089e-13
SORD	1.70698	0.113904	14.9861	9.04527e-51	2.08402e-49	FAM151A	1.07796	0.147872	7.28982	3.10373e-13	2.17489e-12
SLC27A2	1.02405	0.192079	5.3314	9.74609e-08	3.16254e-07	ZSWIM5	-1.5145	0.128418	-11.7935	4.21711e-32	1.09964e-30
FGF7	-1.7168	0.125485	-13.6813	1.31298e-42	2.26616e-41	KNCN	-1.7004	0.426926	-3.9829	6.80795e-05	0.000197035
GCNT3	1.86888	0.201468	9.27633	1.7542e-20	1.21845e-19	TMEM82	-3.18747	0.333039	-9.57084	1.06042e-21	1.41247e-20
BCL2A1	1.4	0.158268	8.84573	9.09304e-19	5.78736e-18	AKR7A3	-2.9944	0.185196	-16.1689	8.3615e-59	9.84572e-57
ARRDC4	-1.01024	0.0885299	-11.4113	3.67103e-30	3.94893e-29	DRAXIN	1.26676	0.149655	8.46457	2.57093e-17	2.51159e-16
PIF1	2.34443	0.130656	17.9435	5.39092e-72	2.35263e-70	MATN1	1.03943	0.10409	9.98589	1.7571e-23	2.65042e-22
CYP11A1	-1.52571	0.13312	-11.4612	2.06728e-30	2.24644e-29	SYNC	-1.05728	0.100159	-10.556	4.76337e-26	8.57636e-25
CYP1A1	-3.58346	0.301295	-11.8935	1.27879e-32	1.52029e-31	UBXN10	-2.35119	0.134163	-17.5248	9.26268e-69	1.7392e-66
PCSK6	1.03568	0.143432	7.22069	5.17256e-13	2.42845e-12	CAMK2N1	-1.25691	0.117367	-10.7092	9.21525e-27	1.7323e-25
CYP1A2	-2.38077	0.24204	-9.8363	7.85434e-23	6.09198e-22	ALPL	1.42964	0.146341	9.76924	1.5259e-22	2.15091e-21
RLBP1	1.2493	0.330877	3.77571	0.000159553	0.000381478	LRRC53	-2.89484	0.46177	-6.26902	3.63339e-10	1.91457e-09
FANCI	1.97058	0.085478	23.0537	1.3505e-117	2.0013e-115	NTNG1	-2.42969	0.283634	-8.5663	1.0686e-17	1.07067e-16
ABHD2	1.00132	0.117232	8.54134	1.3267e-17	7.99281e-17	WDR63	-1.30957	0.147102	-8.90246	5.46221e-19	6.03711e-18
TICRR	2.07035	0.11994	17.2615	9.16928e-67	3.38429e-65	AGL	-1.18395	0.126991	-9.32315	1.12939e-20	1.39968e-19
NTRK3	-1.28323	0.192602	-6.66263	2.68976e-11	1.13779e-10	TRIM58	-1.23382	0.200686	-6.14803	7.84534e-10	4.00301e-09
ST8SIA2	-1.75974	0.182825	-9.62528	6.25339e-22	4.66526e-21	KCNJ9	1.39533	0.199763	6.98496	2.8494e-12	1.8339e-11
2020-09-12	1.95215	0.174632	11.1786	5.18731e-29	5.30874e-28	VANGL2	1.11144	0.146636	7.57955	3.46749e-14	2.63975e-13
SLC5A2	1.02046	0.133645	7.63557	2.24821e-14	1.14457e-13	FCRLB	-2.02295	0.215703	-9.3784	6.6981e-21	8.43655e-20
ABCC12	1.91182	0.291199	6.56535	5.19108e-11	2.14935e-10	SLC9C2	1.61514	0.218671	7.38615	1.51145e-13	1.08862e-12
CLEC18B	1.23419	0.161148	7.65876	1.8773e-14	9.60224e-14	KLHDC9	-1.48968	0.120792	-12.3327	6.0424e-35	1.86333e-33
ADAMTS18	-1.61971	0.188743	-8.5816	9.35616e-18	5.68345e-17	SPATA17	-1.38968	0.107101	-12.9754	1.6868e-38	6.38869e-37
NUDT7	-1.4434	0.0869596	-16.5985	7.14916e-62	2.29503e-60	OXER1	1.57162	0.157185	9.99859	1.54586e-23	2.34144e-22
CDH11	1.54344	0.106661	14.4705	1.86074e-47	3.85444e-46	HAAO	1.89099	0.136683	13.8348	1.57183e-43	8.01252e-42
CDH13	-1.47154	0.0815296	-18.0491	8.01578e-73	3.59735e-71	IL20	-5.00688	0.24898	-20.1096	6.08042e-90	3.32244e-87
ADAD2	-1.38829	0.152301	-9.11547	7.83331e-20	5.28455e-19	FCAMR	2.53489	0.266129	9.52504	1.64981e-21	2.15677e-20
MYOCD	-2.28452	0.168845	-13.5302	1.03709e-41	1.72679e-40	CAPN13	-1.59028	0.157735	-10.082	6.63807e-24	1.03428e-22
SPATA22	-1.60873	0.223894	-7.18523	6.70957e-13	3.13416e-12	KCNF1	-2.91288	0.236472	-12.3181	7.23942e-35	2.2198e-33
SKAP1	1.25556	0.130385	9.62964	5.99382e-22	4.47366e-21	KCNJ3	-7.87543	0.313571	-25.1153	3.3847e-139	1.3717e-135
LRRC46	2.08337	0.129721	16.0604	4.83425e-58	1.39079e-56	NEUROD1	-3.26343	0.774687	-4.21258	2.52473e-05	7.765e-05
SCRN2	-1.03032	0.0924041	-11.1501	7.14967e-29	7.28209e-28	C2orf48	1.29357	0.168543	7.67501	1.65401e-14	1.29132e-13
ABCA8	-3.82099	0.170934	-22.3536	1.1144e-110	1.4016e-108	ACTG2	3.11151	0.202369	15.3754	2.39191e-53	2.10345e-51
C17orf64	-1.0919	0.159403	-6.84996	7.38701e-12	3.24016e-11	VSNL1	2.19806	0.15424	14.2508	4.42913e-46	2.61399e-44
PTRH2	1.0222	0.0872619	11.7142	1.0782e-31	1.23426e-30	CCDC74A	-2.52912	0.168284	-15.0289	4.75129e-51	3.72677e-49
PRELID3A	1.0243	0.0929923	11.0148	3.24122e-28	3.20477e-27	ANKRD30BL	2.09041	0.307176	6.80525	1.00872e-11	6.15189e-11
GNAL	-2.06064	0.100813	-20.4403	7.32911e-93	5.92269e-91	TEKT4	-1.5387	0.215044	-7.15526	8.35146e-13	5.62599e-12
SLC39A6	1.68379	0.155781	10.8087	3.13037e-27	2.95574e-26	EN1	4.0908	0.199188	20.5374	9.98511e-94	6.22546e-91
ASXL3	-1.52645	0.170861	-8.93389	4.11299e-19	2.66795e-18	SPATA18	-1.01439	0.139986	-7.24633	4.28222e-13	2.96271e-12
GREB1L	1.24635	0.159113	7.83311	4.75936e-15	2.51895e-14	NOSTRIN	-1.93283	0.126949	-15.2253	2.40114e-52	1.99606e-50
SLC16A3	2.17413	0.117008	18.5811	4.57387e-77	2.35422e-75	CCDC140	1.92127	0.302077	6.36019	2.01504e-10	1.0887e-09
ANAPC11	1.14001	0.085091	13.3975	6.2494e-41	1.0117e-39	SGPP2	1.19228	0.169997	7.01355	2.32341e-12	1.50834e-11
CBX8	1.48322	0.0834417	17.7755	1.09357e-70	4.55752e-69	HPGDS	-1.03006	0.113509	-9.07469	1.14001e-19	1.3178e-18
SECTM1	1.51048	0.128722	11.7344	8.48848e-32	9.76494e-31	NEURL3	1.42286	0.14993	9.49011	2.30784e-21	2.9857e-20
RNF157	-1.89695	0.135632	-13.986	1.89843e-44	3.52068e-43	C1QTNF7	-2.13226	0.16778	-12.7087	5.29172e-37	1.83684e-35
CBX4	1.70156	0.0850491	20.0068	4.80176e-89	3.49979e-87	IVL	2.67716	0.355604	7.52849	5.13295e-14	3.84979e-13
CBLN2	5.94694	0.313279	18.9829	2.36309e-80	1.34005e-78	SPRR3	-1.38347	0.48893	-2.82959	0.00466079	0.0100786
PMAIP1	1.77745	0.122981	14.4531	2.3977e-47	4.94963e-46	PGLYRP4	2.69338	0.327019	8.23615	1.77847e-16	1.62511e-15
P3H4	1.53983	0.0773909	19.8967	4.34198e-88	3.12291e-86	S100A9	1.12524	0.279318	4.02851	5.61308e-05	0.000164281
ERBB2	1.92697	0.162387	11.8665	1.76693e-32	2.08696e-31	TGFA	1.76534	0.140163	12.595	2.25066e-36	7.48644e-35
GRB7	1.43681	0.15563	9.23222	2.6508e-20	1.82828e-19	C1orf189	-1.52548	0.165282	-9.22956	2.71749e-20	3.27683e-19
MIEN1	2.00314	0.142104	14.0963	4.00371e-45	7.63569e-44	ALPP	3.6501	0.380057	9.60406	7.68535e-22	1.03273e-20
PNMT	1.89571	0.251268	7.54457	4.53796e-14	2.26884e-13	ALPG	2.64724	0.444843	5.95095	2.66585e-09	1.29011e-08
STAC2	-1.77863	0.271435	-6.55269	5.65116e-11	2.33471e-10	NIPAL1	1.61206	0.157086	10.2623	1.04192e-24	1.7118e-23
FKBP10	1.21726	0.0855365	14.2308	5.89835e-46	1.15823e-44	CLDN1	1.66914	0.163219	10.2264	1.50987e-24	2.45573e-23
MISP3	1.51098	0.114794	13.1625	1.44141e-39	2.2304e-38	INAVA	1.7508	0.199543	8.77407	1.72323e-18	1.83015e-17
SAMD1	1.14362	0.0647917	17.6508	1.00384e-69	4.06273e-68	LINC01116	-2.11792	0.130501	-16.2291	3.13998e-59	3.77038e-57
CIB3	3.08243	0.187522	16.4378	1.02655e-60	3.19305e-59	FAM19A4	2.95013	0.264488	11.1541	6.83654e-29	1.47045e-27
DMRTC2	2.13126	0.326842	6.52078	6.9945e-11	2.87517e-10	CCKAR	-2.17475	0.273416	-7.95401	1.80572e-15	1.52191e-14
DNMT3L	1.27534	0.382091	3.33778	0.0008445	0.00185179	SLC15A2	1.18403	0.163428	7.24493	4.32671e-13	2.99136e-12
TRPM2	1.27555	0.098103	13.0021	1.19003e-38	1.78131e-37	PROK2	2.71983	0.22497	12.0897	1.19656e-33	3.43305e-32
DOP1B	1.21142	0.0776629	15.5984	7.45871e-55	1.95024e-53	C3orf30	2.89488	0.414305	6.98732	2.80194e-12	1.80478e-11
IL19	4.35303	0.287964	15.1166	1.25893e-51	2.97891e-50	PDCL2	2.86822	0.407563	7.03749	1.95731e-12	1.2787e-11
NTN5	-1.03473	0.133552	-7.74778	9.35159e-15	4.86286e-14	CXCR1	-1.92803	0.237319	-8.1242	4.50323e-16	3.98839e-15
LMTK3	1.30959	0.129603	10.1047	5.26722e-24	4.309e-23	ADORA1	1.02639	0.16611	6.17897	6.45218e-10	3.31968e-09
CBLC	1.45716	0.121964	11.9475	6.69463e-33	8.07835e-32	NEK10	-3.0904	0.197957	-15.6115	6.08156e-55	5.82189e-53
NLRP12	1.0184	0.130613	7.79708	6.33537e-15	3.32295e-14	RETNLB	1.61668	0.405315	3.9887	6.64377e-05	0.000192581
FBN3	1.55877	0.240456	6.48254	9.01886e-11	3.67742e-10	FCRL4	1.19526	0.208518	5.73218	9.91465e-09	4.50827e-08
TM4SF5	1.98285	0.475401	4.17089	3.03413e-05	7.86169e-05	FCRL1	1.86976	0.258559	7.23145	4.7786e-13	3.2865e-12
KLK3	-1.36486	0.364295	-3.74657	0.000179267	0.000426161	SERPINI1	-1.97502	0.16408	-12.0369	2.27241e-33	6.39523e-32
FAM71E1	1.17125	0.111148	10.5377	5.78905e-26	5.18088e-25	AIM2	1.25066	0.171842	7.27795	3.38935e-13	2.36583e-12
RCN3	1.00535	0.111033	9.05451	1.37183e-19	9.13784e-19	FABP1	1.16236	0.304813	3.81336	0.000137092	0.000379644
MMEL1	1.35817	0.119943	11.3234	1.00454e-29	1.06035e-28	CTLA4	1.16585	0.160673	7.25606	3.98515e-13	2.76465e-12
CFAP74	1.02599	0.176529	5.81199	6.17346e-09	2.20956e-08	ICOS	1.08411	0.168895	6.41883	1.37328e-10	7.53432e-10
PRDM16	-1.65115	0.128017	-12.8978	4.62976e-38	6.79326e-37	ALB	-2.471	0.255908	-9.65581	4.64473e-22	6.34488e-21
PADI3	2.08766	0.257558	8.10562	5.24765e-16	2.92044e-15	CLRN1	-2.52346	0.323699	-7.79569	6.4057e-15	5.17039e-14
PADI1	1.68188	0.236237	7.11946	1.08351e-12	4.99798e-12	PTX3	3.44745	0.200475	17.1964	2.82669e-66	4.77309e-64
EPHA2	-1.12702	0.0911024	-12.3709	3.75405e-35	4.94346e-34	SMIM14	-1.47194	0.0825312	-17.835	3.78206e-71	8.21094e-69
MYOM3	-1.26129	0.119547	-10.5506	5.04762e-26	4.53058e-25	APBB2	-1.52371	0.0808051	-18.8566	2.59378e-79	8.13793e-77
EVA1B	1.46124	0.134238	10.8855	1.35172e-27	1.29932e-26	PRRT3	-1.71441	0.106416	-16.1104	2.15674e-58	2.46208e-56
C1orf94	2.31489	0.46635	4.96385	6.91091e-07	2.09385e-06	FANCD2OS	1.57351	0.157035	10.0201	1.24361e-23	1.89884e-22
DMRTA2	2.48849	0.326011	7.63314	2.29096e-14	1.16524e-13	PCOLCE2	1.22961	0.207952	5.91294	3.36053e-09	1.60841e-08
PLK4	1.75997	0.0892031	19.7299	1.19445e-86	8.19442e-85	CXCL3	1.66184	0.162358	10.2356	1.37285e-24	2.24187e-23
[truncated: 8,975 more rows]
