# Supplementary material for: Coexpression Network Analysis of Genes Related to the Characteristics of Tumor Stemness in Triple-Negative Breast Cancer
Source: Biomed Res Int. 2020 Jul 11;2020:7575862. doi: 10.1155/2020/7575862 (PMC7374213; doi:10.1155/2020/7575862)
Supplement: Supplementary materials — Figure S1: (a, b) KM overall survival curves of mRNAsi in BC (a) and in TNBC (b). (c) OS curves between TNBC and other BC subtypes. Figure S2: WGCNA results. (a) Clustering of samples and removal of outliers. (b) Heat map of sample dendrogram matched with clinical trait. (c) Analysis of topology for appropriate soft thresholding powers of mean connectivity and scale independence. (d) Heat map of the expression of six key genes. Figure S3: other gene modules in WGCNA analysis. Figure S4: (a, b) GO enrichment analysis of other modules of interest. Red module (a) and magenta module (b) Figure S5. OS curve of key genes of breast cancer in GEPIA database. Table S1: DEGs between breast cancer versus normal tissues and TNBC versus non-TNBC. Table S2: DEGs results in other published study of breast cancer and the DEGs results calculated by the FPKM data. [file 7575862.f1.zip › Appendices7_TableS2.xlsx]

## Sheet: Sheet1
Lv et al							Wang et al											Gao et al		FPKM value of our data
165down (overlapped)	590up (overlapped)	N/T-up	N/T-down	TNBC/NTNBC-up	TNBC/NTNBC-down		N/T-up					N/T-down						N/T-DEGs		N/T-up						N/T-down						TNBC/NTNBC-up						TNBC/NTNBC-down
RP1-193H18.3	FEZF1	MMP11	CKM	PHKG1	C5AR2		Gene	logFC	logCPM	PValue	FDR	Gene	logFC	logCPM	PValue	FDR		CKM		gene	conMean	treatMean	logFC	pValue	fdr	gene	conMean	treatMean	logFC	pValue	fdr	gene	conMean	treatMean	logFC	pValue	fdr	gene	conMean	treatMean	logFC	pValue	fdr
LEP	MLC1	COL10A1	ACTA1	DMBT1	ESR1		COL10A1	7.11803	7.22452	3.67932e-162	2.474e-160	CKM	-8.33431	5.32736	0	0		ACTA1		AC006483.1	0.0792898	0.218339	1.46136	2.22e-11	4.55e-11	AC090844.2	0.94804	0.29971	-1.66138	6.86e-29	3.58e-28	IGHV4-61	4.54806	16.6022	1.86805	0.001178	0.00188236	MUC1	149.362	62.8505	-1.24882	6.43e-16	4.13e-15
GLRA4	TNIP3	LINC01614	PYGM	PRM1	MLPH		MMP11	6.24893	8.21961	4.62233e-162	3.09662e-160	ACTA1	-7.00513	6.40563	0	0		MYLPF		PLK1	0.677493	6.94561	3.35782	1.46e-59	1.91e-57	AP000811.1	0.731824	0.286746	-1.35172	4.61e-34	3.24e-33	CHST4	0.11966	1.12933	3.23845	3.38e-27	7.84e-26	TTC6	2.69533	0.270518	-3.31667	2.81e-46	2.41e-43
ELANE	PRSS33	PCLAF	SLN	RP11-153M7.3	TBC1D9		NEK2	4.2572	4.68939	7.17911e-158	4.55723e-156	MYLPF	-6.96877	2.48643	0	0		PYGM		FOXD3	0.0374299	0.336514	3.1684	1.35e-14	3.29e-14	ABCG2	2.60822	0.945597	-1.46377	1.64e-41	1.88e-40	BCL2L14	0.394465	1.38937	1.81646	1.36e-23	2.02e-22	BBS4	6.46072	2.99354	-1.10984	1.45e-38	1.99e-36
ANGPT4	KCNG1	ASF1B	TNNC2	RP1-65P5.5	POTEKP		PKMYT1	3.99633	4.27677	9.65205e-137	4.73602e-135	PYGM	-6.94851	3.96047	0	0		SLN		AL365356.5	0.0627624	0.344203	2.45529	7.81e-33	5.13e-32	CTSG	5.10915	1.5853	-1.68833	1.47e-29	7.95e-29	CYP7B1	2.11483	4.83476	1.1929	3.34e-16	2.21e-15	LINC02551	0.504097	0.0607529	-3.05268	3.18e-07	7.92e-07
TNNT3	BCAR4	IQGAP3	APOBEC2	CTA-215D11.4	RP11-107I14.2		KIF4A	3.84402	4.77692	3.12438e-135	1.49272e-133	SLN	-6.47733	1.83577	0	0		TNNC2		AIM2	0.343309	1.23091	1.84214	7.55e-11	1.5e-10	CCDC85A	0.965489	0.263161	-1.87531	3.85e-44	5.36e-43	FLJ46906	0.939566	2.49572	1.40939	5.87e-31	2.26e-29	CDK15	0.229528	0.111806	-1.03768	7.54e-17	5.32e-16
MRAP	TPX2	UBE2T	UNC45B	TBC1D21	SLC7A8		PCLAF	3.31274	4.2605	4.49132e-131	2.03341e-129	TNNC2	-6.3626	3.03875	0	0		ACTN3		DRAXIN	0.121263	0.309441	1.35152	1.17e-07	1.95e-07	ITIH2	2.23845	0.435591	-2.36146	4.2e-30	2.34e-29	AL451060.1	0.174738	2.36879	3.76088	0.000152914	0.000275834	Z69890.1	0.324015	0.14446	-1.16539	1.44e-13	7.2e-13
GDF10	NKX2-5	PAFAH1B3	ACVR1C	RP11-204E9.1	LINC00504		HSD17B6	2.99976	2.42117	1.94226e-129	8.55868e-128	ACTN3	-6.34792	0.979271	0	0		KLHL41		GPR19	0.149177	0.715774	2.26248	1.23e-34	8.94e-34	HOXB-AS1	4.56228	1.90124	-1.26282	1.42e-22	5.29e-22	NXN	4.9222	12.3368	1.3256	7.14e-25	1.22e-23	SPAG17	0.656952	0.269236	-1.28692	5.98e-12	2.51e-11
RBFOX1	LPO	UBE2C	TTN	MYT1L-AS1	CFAP99		SPC25	2.82391	2.88025	5.21657e-129	2.28761e-127	KLHL41	-6.30849	3.16771	0	0		ATP2A1		U62317.4	0.101939	0.676086	2.7295	9.94e-21	3.36e-20	PDE8B	3.99583	1.75363	-1.18815	4.93e-32	3.09e-31	CCL24	0.236076	0.616471	1.38478	2.07e-13	1.02e-12	AC015922.2	9.06414	4.51757	-1.00462	5.03e-20	4.96e-19
KLHL41	ASNSP1	PLPP4	FHL1	PDIA2	PRR15		ASF1B	3.06672	4.74918	1.86457e-127	7.89073e-126	ATP2A1	-6.15814	3.91839	0	0		TNNC1		TCL1A	0.282792	0.967793	1.77495	3.39e-06	5.16e-06	RAPGEF3	4.2781	1.4104	-1.60086	1.32e-49	3.09e-48	FCRL5	0.31328	0.831329	1.40797	6.68e-09	2.01e-08	GRAMD4P7	0.576583	0.0451045	-3.67618	8.3e-15	4.7e-14
GPD1	IGF2BP3	CKAP2L	HBB	OR7E156P	SLC16A6		CDC25C	3.39187	2.5941	3.24413e-125	1.34776e-123	TNNC1	-6.15193	2.95125	0	0		MYL3		AL591846.2	0.16868	0.38374	1.18584	1.6e-13	3.68e-13	ZNF483	0.632324	0.283163	-1.15903	6.09e-31	3.57e-30	IRF4	1.0524	2.59104	1.29985	2.15e-08	6.09e-08	RHOT1P2	0.276016	0.0524188	-2.39659	5.75e-13	2.69e-12
RP11-643A5.3	CTD-2314B22.1	POC1A	KLB	CTA-992D9.6	DRAIC		IQGAP3	3.71245	5.30204	7.79736e-124	3.18831e-122	MYL3	-6.0781	1.67205	0	0		NEB		LINC01740	0.140953	0.364589	1.37106	0.0135573	0.015846	OGN	39.5012	8.11237	-2.2837	2.24e-50	5.59e-49	SOX8	0.557256	6.77765	3.60437	6.25e-27	1.38e-25	HOXB2	20.4351	4.47317	-2.19168	2.46e-24	3.96e-23
CYP1A1	PADI1	ZWINT	LPL	FSD2	LINC01087		UHRF1	3.34555	4.43042	7.37266e-122	2.9225e-120	NEB	-6.06562	5.14458	0	0		APOBEC2		OR2I1P	1.37187	5.20182	1.92287	1.49e-05	2.17e-05	CFD	204.834	27.7439	-2.88421	1.94e-47	3.61e-46	AC006483.1	0.174699	0.401501	1.20053	3.7e-14	1.96e-13	MGAT4A	12.4583	5.78531	-1.10663	1.96e-18	1.61e-17
ADGRD2	HTN1	CENPF	SLC2A4	RP11-794P6.1	GATA3		UBE2T	3.22267	4.54233	6.01673e-121	2.35418e-119	APOBEC2	-6.02263	0.370718	0	0		GLYAT		ORC1	0.507107	2.30025	2.18143	1.63e-42	2.01e-41	DEFB132	6.98664	0.277417	-4.65447	4.13e-41	4.62e-40	ATP13A5	0.7138	2.01764	1.49908	6.49e-16	4.16e-15	DNAAF3	1.47639	0.363828	-2.02074	4.82e-29	1.42e-27
MYH1	ITLN2	PLK1	HSPB6	RP11-726G1.1	ZNF552		NUSAP1	3.0603	5.49388	3.17795e-120	1.23545e-118	GLYAT	-5.881	1.51839	0	0		MYOT		GMPSP1	0.0872247	0.276785	1.66596	3.06e-23	1.18e-22	LAMA2	12.5636	4.06669	-1.62732	7.36e-40	7.55e-39	PLK1	5.77767	13.6095	1.23605	1.86e-25	3.42e-24	VSTM2A	5.53591	0.0675944	-6.35577	2.74e-18	2.22e-17
MYH2	TMEM132E	KIFC1	ENO3	RP5-1039K5.19	POTEI		TPX2	3.58395	6.29153	3.27471e-119	1.25427e-117	MYOT	-5.86991	2.1427	0	0		LDB3		AP000251.1	0.165853	0.911206	2.45787	1.03e-36	8.44e-36	RNU5B-4P	1.34735	0.531591	-1.34173	3.28e-24	1.32e-23	IGLL3P	0.197394	0.415516	1.07383	8.28e-05	0.000154821	AC120498.10	1.11817	0.0353934	-4.98152	1.1e-34	7.56e-33
GLYATL1P4	CYP2F1	PBK	SRL	STATH	CA12		HJURP	3.53403	3.94018	6.16218e-116	2.26009e-114	LDB3	-5.52926	3.30316	0	0		TNNI1		LINC01615	0.201767	0.722789	1.84089	5.33e-27	2.51e-26	GLDN	2.09257	0.525208	-1.99432	1.51e-42	1.87e-41	DOCK3	0.319155	0.736363	1.20616	4.06e-15	2.38e-14	ZNF442	0.587463	0.253682	-1.21148	3.7e-29	1.1e-27
CSRP3	FLJ36000	PTTG1	GYG2	RP11-326K13.2	CXXC5		NUF2	3.77714	4.1384	3.7604e-115	1.36268e-113	TNNI1	-5.44497	3.5835	0	0		UNC45B		PRAC2	0.00680646	0.594668	6.44904	9.21e-16	2.39e-15	FGF16	0.537147	0.221915	-1.27531	1.04e-09	1.94e-09	BLACAT1	0.140109	1.282	3.19378	9.03e-34	5.46e-32	AC098829.1	0.231049	0.0769331	-1.58652	8.93e-18	6.9e-17
MYOD1	LINC00460	WISP1	ITIH5	LOXL4	TPRG1		CDK1	3.15721	5.52004	4.29824e-114	1.52411e-112	UNC45B	-5.36131	-0.144329	0	0		ACVR1C		OR7E62P	0.0851241	0.627671	2.88237	8.46e-09	1.5e-08	WISP2	16.5648	5.91992	-1.48447	5.44e-17	1.51e-16	NDRG2	9.72623	25.4211	1.38607	4.13e-12	1.76e-11	PVALB	17.8281	0.574844	-4.95484	3.97e-18	3.17e-17
SLC14A2-AS1	UCMA	NEIL3	AOC3	C8orf46	ABAT		PAFAH1B3	2.49007	5.94956	8.15745e-114	2.8757e-112	ACVR1C	-5.19123	3.30519	0	0		KCNIP2		TMEM158	2.0841	6.10216	1.54989	5.41e-06	8.12e-06	TAC1	1.01654	0.357445	-1.50787	2.41e-25	1.04e-24	FOXD3	0.265924	0.575704	1.11431	0.00121164	0.00193239	UBXN10-AS1	2.83157	1.13285	-1.32164	1.34e-11	5.42e-11
CTD-2263F21.1	ANLN	MELK	LRRC2	AC016995.3	AC092667.2		UBE2C	4.1922	5.29749	5.65105e-113	1.98059e-111	KCNIP2	-5.10949	4.07979	0	0		HSD17B13		ETV7	0.814487	3.22372	1.98476	3.11e-28	1.57e-27	LEP	96.6884	1.68288	-5.84434	7.66e-54	2.87e-52	PRR7-AS1	0.176319	0.52865	1.58412	3.43e-24	5.44e-23	GRIA2	2.40355	0.228399	-3.39554	5.31e-05	0.000101677
ART1	CD1A	KIF18B	ACSM5	RP4-655C5.4	RP11-102N12.3		CCNB1	2.57286	5.68656	6.35964e-113	2.22465e-111	HSD17B13	-5.04461	0.256381	0	0		LVRN		TRIP13	1.10772	6.22511	2.49051	1.55e-53	5.61e-52	AP003306.1	1.39665	0.441102	-1.66279	4.2e-23	1.6e-22	THORLNC	0.266514	0.632739	1.2474	1.55e-15	9.52e-15	AC120049.1	1.04652	0.412618	-1.34273	4.14e-13	1.97e-12
PFKFB1	RP11-471M2.3	NUAK2	SYPL2	ELDR	LRRC46		DTL	3.04895	4.9203	9.3924e-113	3.26665e-111	LVRN	-5.0409	1.39147	0	0		HSPB7		CCL20	0.217197	1.15222	2.40734	8.89e-13	1.97e-12	AC004947.2	0.441828	0.21872	-1.0144	1.06e-33	7.32e-33	C2orf70	0.348146	1.09596	1.65443	1.89e-14	1.03e-13	SIGLEC17P	0.42807	0.152575	-1.48833	1.19e-17	9.09e-17
CMYA5	SCUBE3	AURKA	SORBS1	RANBP20P	CTD-3032H12.1		PLPP4	4.98308	2.99844	1.50435e-112	5.2022e-111	HSPB7	-5.03768	4.05781	0	0		FHL1		APOBEC3B	1.10822	6.27965	2.50245	1.51e-32	9.72e-32	ADCY5	5.05608	2.35033	-1.10516	1.53e-31	9.26e-31	AC011352.3	0.640696	2.40655	1.90925	2.89e-09	9.05e-09	IGFBP4	368.199	152.383	-1.27278	1.24e-28	3.47e-27
GLDN	TNFRSF9	GABRD	ITGA7	MGAM2	RAD17P1		CKAP2L	3.34036	3.61344	8.87775e-112	3.04105e-110	FHL1	-4.99279	7.28514	0	0		TTN		CD19	0.310177	0.941836	1.60238	0.000178981	0.000242036	PLA2G16	66.6347	30.4196	-1.13127	3.07e-20	1.02e-19	AL365356.5	0.280132	0.629971	1.16918	0.00772842	0.0110004	ABHD2	27.223	10.5913	-1.36194	2.06e-20	2.14e-19
CMA1	RN7SKP227	TACC3	ACACB	PGAM1P4	AGR3		POC1A	2.11858	3.66225	2.09639e-111	7.14072e-110	TTN	-4.94422	5.86909	0	0		LYVE1		PDCD1	0.318735	1.12147	1.81497	9.29e-14	2.16e-13	COL14A1	39.5705	13.5616	-1.54489	9.68e-37	7.96e-36	AIM2	0.922343	2.24107	1.28081	2.18e-13	1.07e-12	PPP1R14D	0.69152	0.194837	-1.8275	4.03e-17	2.91e-16
CCL14	CCNE1	SGO1	NPR1	FAM19A3	ANXA9		TROAP	3.57202	3.85322	3.81269e-111	1.29382e-109	LYVE1	-4.93825	3.73267	0	0		HBB		IQGAP3	0.517889	6.44135	3.63665	2.54e-60	4.58e-58	SYNPO2	18.7021	3.84977	-2.28036	2.47e-57	1.66e-55	MUC15	1.91532	6.81801	1.83176	3.64e-18	2.92e-17	KIF16B	11.7166	4.50348	-1.37944	5.72e-31	2.21e-29
TCEAL6	A2ML1	ERCC6L	TNS1	EGFR	CACNA2D2		CKS2	2.65723	5.05311	1.03139e-110	3.48694e-109	HBB	-4.91235	4.96097	0	0		VEGFD		PRSS27	0.295755	0.829086	1.48712	6.18e-15	1.53e-14	ADRA2A	15.871	6.42585	-1.30444	3.99e-33	2.66e-32	ANXA8	0.374588	1.73659	2.21288	1.61e-15	9.86e-15	GALNT16	2.46377	1.0692	-1.20434	4.21e-13	2e-12
MYOZ2	TLR8-AS1	EXO1	NIPSNAP3B	KRT18P54	EFCAB12		ZWINT	2.5913	5.39113	9.4409e-110	3.13918e-108	VEGFD	-4.9027	2.08444	0	0		MYOM1		CNIH2	0.267216	2.54602	3.25217	4.36e-56	2.28e-54	SLC26A3	4.37835	1.24298	-1.81659	7.21e-17	1.99e-16	IGKV3-20	238.543	597.005	1.32349	2.61e-06	5.84e-06	PRSS23	26.2428	7.9739	-1.71856	1.13e-23	1.7e-22
LINC01028	FOXM1	CDCA8	GSN	LINC01235	SCUBE2		TEDC2	2.83242	2.92107	5.95346e-109	1.95452e-107	MYOM1	-4.69568	3.30601	0	0		LPL		KIF1A	0.0816902	1.54187	4.23837	0.000263533	0.000351888	CD300LG	17.0633	0.627193	-4.76585	8.27e-66	4.4e-62	DRAXIN	0.233548	0.546302	1.22598	2.87e-14	1.54e-13	AC090844.2	0.340656	0.139264	-1.2905	9.91e-11	3.66e-10
LINC01070	GSG2	ASPM	CAV2	TMSB15A	AC007255.8		SPC24	3.16166	3.50467	6.80013e-109	2.21645e-107	LPL	-4.68809	7.15155	0	0		KLB		BUB1	0.528009	4.89497	3.21267	2.17e-58	1.91e-56	PWAR5	1.1518	0.495261	-1.21763	1.42e-27	6.9e-27	CLLU1OS	0.132633	0.700472	2.40089	9.41e-19	8.04e-18	RF00012	0.764354	0.0488285	-3.96845	4.39e-09	1.35e-08
PLAC9	ORM1	EZH2	PPARG	GABRA4	ZMYND10		HMMR	3.04728	3.92848	7.37654e-109	2.39573e-107	KLB	-4.64964	2.64162	0	0		SLC2A4		CLPSL1	0.490381	3.64169	2.89263	1.39e-20	4.66e-20	AC124312.4	0.837311	0.375166	-1.15823	4.07e-28	2.03e-27	USP6NL	2.11237	4.24224	1.00596	1.89e-30	6.74e-29	UGT2B15	1.53633	0.195058	-2.97751	3.4e-24	5.39e-23
C1QTNF7	CTA-384D8.31	NDC80	TNXB	LIPJ	SPEF1		PLK1	3.43111	4.93328	8.61899e-109	2.79425e-107	SLC2A4	-4.63323	2.41158	0	0		HSPB6		LINC01238	0.506443	3.68937	2.86491	2.48e-05	3.56e-05	CBLN4	1.08946	0.368043	-1.56566	4.13e-15	1.04e-14	SYNM	5.45766	16.9979	1.639	8.43e-17	5.91e-16	SRRM3	0.876346	0.308184	-1.50771	1.91e-22	2.46e-21
NRAP	UGT1A10	KNL1	PAMR1	LINC00092	TRIM3		KIF20A	3.38383	4.89113	2.10092e-108	6.7389e-107	HSPB6	-4.53164	5.02646	0	0		LIPE		PCSK9	0.108633	0.325462	1.58303	1.38e-06	2.15e-06	AC007743.1	1.09177	0.518023	-1.07558	1.78e-38	1.66e-37	GPR19	0.584529	1.3922	1.25202	1.61e-18	1.34e-17	AP000811.1	0.291088	0.145167	-1.00374	1.78e-09	5.71e-09
MAS1L	NFE4	SKA1	RP11-644F5.10	MRAS	NEK5		CENPF	3.27223	6.84473	2.37421e-108	7.60207e-107	LIPE	-4.5106	5.95592	0	0		ENO3		AL031058.1	1.16782	2.65964	1.18741	8.2e-16	2.14e-15	EGR3	29.2744	6.61655	-2.14549	6.31e-35	4.66e-34	CGAS	1.93483	4.5767	1.2421	5.35e-20	5.26e-19	RNU6-553P	0.229056	0.106993	-1.09819	0.00348248	0.0052028
TMEM178A	HCRTR2	RAD51	SDPR	PTCHD1	TPSG1		BUB1	3.30231	4.75772	2.44688e-108	7.82096e-107	ENO3	-4.4373	3.94911	0	0		GPAM		EXO1	0.371593	3.80186	3.35491	1.04e-56	6.18e-55	TENM2	2.12171	0.53324	-1.99237	6.71e-31	3.92e-30	SMTNL2	0.149849	1.12729	2.91128	4.6e-12	1.95e-11	ABCG2	1.03293	0.500995	-1.04387	5.28e-15	3.06e-14
SLC14A2	ORC1	PRC1	PLIN1	NOS1	AK8		CEP55	3.43721	4.56813	3.79632e-108	1.20493e-106	GPAM	-4.42061	6.39326	0	0		SRL		ACTL8	0.0128792	3.16561	7.9413	9.73e-30	5.31e-29	MIR10B	1.1898	0.406145	-1.55065	1.97e-30	1.12e-29	TMEM61	1.18609	2.4906	1.07028	0.00177094	0.00276259	SP5	1.38383	0.373613	-1.88905	8.78e-11	3.26e-10
PDK4	RP11-351J23.1	CDCA5	MYOZ1	CDCA2	EVL		CDKN3	2.9134	3.35442	1.14761e-107	3.62346e-106	SRL	-4.369	1.43456	0	0		RDH5		RCOR2	0.498487	2.40271	2.26903	1.52e-14	3.7e-14	NNAT	14.9503	1.46842	-3.34783	5.84e-50	1.41e-48	SAA2	3.39883	7.96366	1.22839	3.59e-10	1.25e-09	CTSG	1.87269	0.69153	-1.43724	3.19e-10	1.12e-09
RP11-238F2.1	EN1	GINS1	FBP2	RP11-1193F23.1	NAT1		INHBA	3.40499	6.28232	3.53334e-107	1.10031e-105	RDH5	-4.22353	1.37096	0	0		GYG2		MAST1	0.0859363	0.323434	1.91213	1.67e-09	3.08e-09	PLIN4	291.663	10.0207	-4.86325	3.81e-53	1.31e-51	U62317.4	0.499158	1.71946	1.78439	1.8e-14	9.87e-14	RBM11	1.33137	0.63155	-1.07594	1.18e-17	9.02e-17
MYOCD	PDCL2	ANLN	AQP7	KRT18P29	RP11-473M20.11		KIFC1	3.16283	5.14407	5.54997e-107	1.71652e-105	GYG2	-4.1125	5.29687	0	0		BTNL9		GGH	3.85894	11.0446	1.51707	3.24e-15	8.17e-15	LIPE	78.9898	4.12796	-4.25816	5.92e-50	1.42e-48	AC011005.4	0.180918	0.483451	1.41803	5.43e-13	2.55e-12	AC064799.2	0.411239	0.0174965	-4.55484	2.16e-24	3.5e-23
C14orf180	ERVV-2	CENPM	GPX3	IL12RB2	MAGED2		PBK	3.45342	3.85322	5.87035e-107	1.81252e-105	BTNL9	-3.97998	4.12311	0	0		ITIH5		PRAME	0.299554	8.13341	4.76297	6.34e-07	1.01e-06	MYRIP	1.96926	0.954626	-1.04465	1.17e-29	6.37e-29	PIM1	9.19801	23.2419	1.33733	2.16e-26	4.46e-25	ANKRD20A11P	0.246632	0.0450766	-2.45191	5.8e-21	6.36e-20
URAD	RP11-343B18.2	NCAPH	ALDH1L1	HMSD	AOX2P		COL11A1	6.17432	7.71207	1.53335e-105	4.63195e-104	ITIH5	-3.95987	5.67617	0	0		AOC3		TNIP3	0.0527586	0.226539	2.10228	7.16e-10	1.35e-09	CYBRD1	127.122	61.2726	-1.0529	2.28e-32	1.45e-31	AC007991.2	0.197952	1.68296	3.08777	1.12e-09	3.68e-09	KLF2P1	0.817603	0.30541	-1.42065	8.35e-10	2.78e-09
HSD17B13	GPR19	KIF14	PLIN4	MAML2	RAB6C-AS1		PTTG1	3.21666	4.5792	1.00221e-104	3.00746e-103	AOC3	-3.94954	6.37343	0	0		CLEC3B		NMU	0.188242	2.24957	3.57899	2.53e-20	8.37e-20	PLIN1	274.27	8.62698	-4.9906	2.33e-52	7.27e-51	KRT81	20.6858	184.559	3.15737	4.88e-15	2.84e-14	AC005831.1	3.65777	1.76002	-1.05537	9.52e-17	6.64e-16
RP11-798K3.2	CHST6	FOXM1	PDE3B	RP5-1119A7.17	BCAS4		WISP1	3.53935	4.32423	2.17399e-104	6.49159e-103	CLEC3B	-3.88385	3.92107	0	0		CRHBP		IVL	0.040161	0.522078	3.7004	0.0014531	0.00183931	CIDEC	144.113	4.57003	-4.97886	4.7e-52	1.41e-50	CCL5	24.5851	56.559	1.20197	8.59e-10	2.86e-09	CPA6	2.01189	0.106271	-4.24273	5.71e-20	5.59e-19
RP11-739N10.1	HTR3A	LINC01705	KIAA0408	VRTN	CTD-2284J15.1		PYCR1	2.35935	6.68271	3.18391e-104	9.47603e-103	CRHBP	-3.86818	0.168166	0	0		KLHL31		LINC02195	0.0550423	0.323082	2.55329	9.87e-18	2.86e-17	MYL3	9.40344	0.314629	-4.90147	6.95e-26	3.06e-25	POLR3G	0.715672	1.75874	1.29717	8.12e-18	6.31e-17	TMEM244	0.238779	0.0946268	-1.33536	1.27e-09	4.15e-09
CASQ1	DNAH17-AS1	CENPU	FAM13A	PDYN	AGR2		DLGAP5	3.3036	4.16298	3.70649e-104	1.10133e-102	KLHL31	-3.81444	2.29502	0	0		ACSM5		CCL17	0.491178	1.77815	1.85606	2.45e-10	4.75e-10	HRASLS5	15.5919	4.01444	-1.95753	3.02e-37	2.56e-36	C8orf31	0.256394	0.885947	1.78886	0.00280202	0.00424576	LINC01801	0.485373	0.194949	-1.31599	6.79e-16	4.34e-15
GPIHBP1	AP000593.5	ESPL1	GPR146	IDO1	C9orf116		NEIL3	3.4013	1.82739	8.29478e-104	2.44865e-102	ACSM5	-3.71358	1.91271	0	0		ACACB		GRHL3	0.572126	1.2455	1.12232	3.1e-07	5.02e-07	HRC	2.04716	0.515627	-1.98922	2.44e-35	1.84e-34	FAM49A	2.15558	4.4619	1.04958	1.03e-23	1.55e-22	CYP4F35P	0.687249	0.293479	-1.22757	5.54e-15	3.2e-14
OGN	PRR27	FAM83D	ASB11	RTP1	RP11-148B18.1		BUB1B	2.95911	4.33782	8.54473e-104	2.51834e-102	ACACB	-3.62895	6.01477	0	0		SORBS1		CLDN14	0.0918682	0.246716	1.42521	3.01e-25	1.29e-24	AC132008.1	0.846157	0.375172	-1.17337	1.3e-30	7.48e-30	TCL1A	0.757104	2.26347	1.57997	1.58e-09	5.1e-09	SMIM22	34.7981	11.0876	-1.65006	2.27e-27	5.39e-26
CA4	HIST1H2BJ	TOP2A	FZD4	OVOS2	ARMT1		BICDL1	2.73427	4.6044	2.34341e-103	6.88423e-102	SORBS1	-3.62438	6.82927	0	0		SYPL2		CASP14	0.118848	11.5339	6.60061	7.27e-06	1.08e-05	AL163636.2	0.569199	0.20835	-1.44993	2.85e-40	3.01e-39	LEFTY2	0.254227	3.10167	3.60886	0.00907878	0.0127654	SCGB1D2	556.238	79.6702	-2.80359	7.25e-19	6.28e-18
RP13-392I16.1	ECEL1	HAGHL	IGFBP6	KBTBD12	RP11-433A19.2		AURKA	3.12452	4.68282	2.37634e-103	6.9697e-102	SYPL2	-3.62198	0.882417	0	0		NPR1		UPK2	0.222092	0.652732	1.55533	0.0095533	0.011304	PDGFD	20.5161	5.80314	-1.82185	3.58e-56	1.91e-54	AC243562.2	0.270673	0.935361	1.78897	2.06e-09	6.56e-09	CPEB4	6.28294	2.91349	-1.10869	3.95e-24	6.22e-23
MYL3	CLDN6	LINC00922	SLC19A3	STOX2	LA16c-312E8.4		MELK	3.64446	4.38627	1.16818e-102	3.38251e-101	NPR1	-3.57678	4.34726	0	0		CAV1		NDC80	0.550325	4.83225	3.13434	2.21e-58	1.93e-56	PGM5	5.74096	1.08633	-2.40182	3.91e-59	4.4e-57	AL591846.2	0.328806	0.666204	1.01873	1.99e-12	8.79e-12	AL450996.1	0.693985	0.0623345	-3.4768	1.21e-19	1.15e-18
C10orf71	NPHS1	CCNA2	ADAMTS5	LINC01014	PCP2		NUAK2	2.26528	3.51335	2.03775e-102	5.89099e-101	CAV1	-3.36496	7.21982	0	0		TNS1		DIAPH3	0.362596	1.70082	2.2298	7.44e-45	1.09e-43	TAT	30.7569	13.3392	-1.20523	6.67e-23	2.51e-22	AC004231.1	0.321526	0.88638	1.46299	1.46e-14	8.08e-14	ROPN1L	0.839397	0.120927	-2.79522	4.72e-32	2.22e-30
CAPN11	APOBEC3B	AURKB	LINC01537	PLA2G4A	GRAMD4P8		KIF18B	3.56682	3.59934	2.43054e-102	7.01534e-101	TNS1	-3.0659	8.03511	0	0		GSN		TMEM105	0.140838	0.305045	1.11498	0.00822213	0.00978807	AP003555.3	1.84083	0.352829	-2.38332	6.1e-32	3.8e-31	CT83	0.582009	10.2931	4.14449	7.49e-38	8.82e-36	CCDC85A	0.294614	0.130235	-1.17771	3.38e-09	1.05e-08
MYF6	SRD5A2	ESCO2	SVEP1	S100B	CELSR1		LMNB1	2.45373	5.95241	6.93256e-101	1.93632e-99	GSN	-2.4986	9.3391	0	0		SIK2		SIRPG	0.421061	1.28877	1.6139	1.77e-09	3.27e-09	TRARG1	72.6687	2.66337	-4.77001	1.11e-51	3.18e-50	CDCA7	1.75714	7.42232	2.07864	6.9e-37	6.96e-35	GTF2H2B	0.620462	0.162955	-1.92887	4.78e-12	2.03e-11
FAM47E-STBD1	KIF14	CILP2	LEP	ARL9	FBP1		RRM2	3.42064	5.78871	1.38728e-100	3.84519e-99	SIK2	-2.41809	6.04277	0	0		ITGA7		FAM72A	0.0755519	0.411246	2.44446	3.59e-48	7.15e-47	AQP7	23.0028	0.809871	-4.82798	5.74e-58	4.46e-56	FDCSP	51.5462	796.09	3.94899	1.39e-19	1.3e-18	SYT9	2.8616	0.185965	-3.94372	3.13e-34	2.06e-32
MYOC	IL17C	FANCI	TMEM37	FRMD3	KCNJ11		GABRD	3.21935	1.92586	1.47376e-100	4.07868e-99	ITGA7	-3.61806	4.93414	9.88131291682493e-324	3.26083326255223e-321		NIPSNAP3B		RHBDL2	0.908416	1.82292	1.00483	2.28e-14	5.49e-14	AOX1	9.88105	2.34622	-2.07433	3.84e-47	6.92e-46	HAPLN3	4.31805	25.9561	2.58762	1.78e-38	2.37e-36	POSTN	246.014	110.251	-1.15794	6.35e-17	4.5e-16
TCAP	ALPP	ADAMTS14	FRMD1	ALKAL1	ABLIM3		PAQR4	2.58761	5.10562	4.27073e-100	1.17123e-98	NIPSNAP3B	-2.87155	1.59879	1.18575755001899e-322	3.84432479029074e-320		LRRC2		CDC7	1.192	3.89896	1.7097	5.78e-40	5.98e-39	TIMP4	55.2177	2.82129	-4.2907	1.81e-51	5.05e-50	IGLV3-21	107.386	241.033	1.16642	1.05e-09	3.47e-09	LINC00398	0.259838	0.128282	-1.01829	5.26e-11	2e-10
RP11-14K3.7	FOXCUT	DEPDC1	MYLK2	C1orf186	F7		KIF2C	3.33068	4.80421	4.31523e-100	1.18164e-98	LRRC2	-3.87284	0.72136	1.38338380835549e-322	4.40607742961224e-320		EBF1		ZBP1	0.274266	0.937584	1.77337	8.98e-11	1.78e-10	BMPER	1.27701	0.318838	-2.00188	4.13e-50	1.01e-48	SFN	40.9344	89.1266	1.12254	1.21e-10	4.43e-10	SPINK4	1.08956	0.0398071	-4.77457	2.36e-28	6.38e-27
RP11-32D16.1	MAGEB6	C6orf99	NRAP	FAM107A	KDM4B		KIF11	2.51594	5.30286	5.18742e-100	1.41834e-98	EBF1	-3.04761	4.32502	6.27499387603965e-316	1.96418127275681e-313		CA3		IL2RG	5.7362	12.1914	1.08769	0.000147254	0.000200339	AMIGO2	29.646	14.5972	-1.02214	1.42e-26	6.54e-26	MTND4P24	1.14202	2.44819	1.10013	0.000243518	0.000427853	AP001533.1	0.429196	0.0654899	-2.71229	1.68e-31	7.13e-30
RP11-115H13.1	RP11-263K4.5	GJB2	ADH1A	CCDC82	BCAS1		EXO1	3.44519	3.85489	6.8133e-100	1.85729e-98	CA3	-5.87278	4.53005	7.4309002761763e-316	2.2865761782173e-313		PDE2A		AC012073.1	0.371783	1.10481	1.57127	2.51e-37	2.15e-36	AFP	2.00728	0.898099	-1.16029	2.54e-22	9.29e-22	DPYSL5	0.220485	1.00141	2.18328	3.36e-12	1.45e-11	HOXB4	2.20344	0.914119	-1.26931	8.97e-08	2.37e-07
NXNL1	AURKB	CENPE	PCOLCE2	RP11-60A14.1	TUBA3E		CDCA8	3.03672	4.53547	7.60909e-100	2.07111e-98	PDE2A	-3.10834	3.88745	5.83873499770625e-315	1.7667038980543e-312		PPARG		LYPD1	0.158599	0.646761	2.02785	2.13e-33	1.45e-32	SGCG	4.98116	1.02443	-2.28166	3.12e-42	3.77e-41	AC016877.3	0.31773	0.835924	1.39557	0.00717527	0.0102531	DTWD2	2.75207	1.27423	-1.1109	1.14e-30	4.15e-29
NMRK2	RP11-3B12.5	UBE2S	SPX	RGMA	KCNE4		KIF23	2.6345	4.81364	2.5267e-99	6.85682e-98	PPARG	-3.39162	4.15789	2.89589614454569e-314	8.61885155807201e-312		PPP1R27		AL592494.3	0.0721394	0.447878	2.63425	9.31e-16	2.42e-15	PALM	16.9022	7.20792	-1.22956	2.28e-22	8.36e-22	PDLIM1P4	0.176491	0.397608	1.17175	4.11e-10	1.42e-09	ENTPD8	1.64285	0.309509	-2.40814	1.46e-23	2.15e-22
SMCO1	NIPAL4	LINC01561	TCAP	LINC00511	TMPRSS6		SGO1	3.26635	2.65109	2.95646e-99	7.99918e-98	PPP1R27	-5.8132	-0.533457	2.65107287736287e-310	7.76294e-308		PAMR1		SGO1	0.196126	1.78005	3.18206	2.8e-56	1.53e-54	GHR	22.2878	2.9517	-2.91663	2.99e-56	1.61e-54	FXYD6	2.4383	5.92096	1.27996	5.73e-09	1.74e-08	AC093724.1	2.4917	1.16118	-1.10154	5.14e-18	4.06e-17
LINC01532	KCNJ6	FAM83H-AS1	RP11-941H19.2	TMEM71	AKR7A3		ERCC6L	2.85011	2.82157	4.49125e-99	1.20977e-97	PAMR1	-3.51876	3.67716	4.33312e-306	1.2487e-303		CAV2		VPREB3	0.657308	1.81435	1.46481	6.34e-06	9.47e-06	ATP1A2	13.6891	0.742053	-4.20537	2.92e-60	5.17e-58	LINC01740	0.242904	0.78565	1.6935	1.41e-13	7.03e-13	HIST1H2BD	57.2248	24.576	-1.21939	4.78e-13	2.26e-12
LRRN4CL	DEFB4A	E2F1	MAP1LC3C	SIRPA	RALGPS2		TACC3	2.35283	5.56903	5.67736e-99	1.52249e-97	CAV2	-2.88872	5.57685	1.75504e-304	4.97857e-302		ABCD2		CTPS1	2.95875	7.21986	1.28699	1.08e-37	9.49e-37	ABCA8	9.4664	0.762605	-3.63381	6.54e-61	1.6e-58	AC079310.1	0.297384	0.665318	1.16172	0.000740433	0.00121751	EWSAT1	2.61985	0.563253	-2.21763	1.26e-21	1.49e-20
HFE2	GTSF1	CCL11	DPT	IGLV3-10	RP11-288G3.4		TK1	3.07734	6.07222	9.30271e-99	2.48734e-97	ABCD2	-4.07727	1.91168	1.44786e-302	4.04399e-300		SLC16A7		TFR2	0.0869651	0.796645	3.19543	2.66e-41	3.01e-40	MIR27B	2.26684	0.636667	-1.83207	1.94e-36	1.57e-35	SOX15	1.0736	3.1272	1.54242	0.00505555	0.0073736	TRIM36	2.07862	1.03452	-1.00666	0.00898113	0.012639
RP4-663N10.1	GPR158	RDM1	LRRN4CL	RNF150	GATA3-AS1		ASPM	3.53605	5.03224	1.25059e-98	3.334e-97	SLC16A7	-3.36317	3.73095	1.61985e-302	4.45583e-300		SYNE3		STMN1	10.7956	35.9314	1.7348	6.45e-45	9.48e-44	C6	3.40929	0.46806	-2.86471	5.13e-27	2.42e-26	RF00154	0.188205	0.756497	2.00703	1.51e-68	7.44e-65	AC011330.2	0.425616	0.197408	-1.10837	5.49e-16	3.54e-15
MYOG	WFDC21P	KIF15	RP11-798K3.2	KCNS1	PLEKHD1		NDC80	3.20743	4.01059	1.76577e-98	4.69363e-97	SYNE3	-2.97214	4.54931	6.58135e-302	1.78335e-299		MYH2		DDX11-AS1	0.159464	0.422376	1.4053	8.31e-31	4.83e-30	ADAM33	5.51404	0.876396	-2.65345	3.22e-59	3.81e-57	AL138881.1	0.145701	0.502178	1.78518	6.37e-05	0.000120919	AL355512.1	0.443592	0.194049	-1.19281	2.78e-18	2.25e-17
HRC	LIN28B	BGN	MOCS1	BPIFB3	FOXA1		KNL1	2.83326	3.8884	4.23886e-98	1.11855e-96	MYH2	-8.55396	5.80094	8.67176e-301	2.31523e-298		MMD		AC004687.1	0.378261	0.838518	1.14846	0.00036222	0.000478608	CD36	141.059	9.05514	-3.96142	1.73e-57	1.22e-55	LINC01315	1.20664	4.87418	2.01417	6.7e-34	4.14e-32	EFCAB12	0.555296	0.110335	-2.33136	1.69e-31	7.16e-30
GPC3	LINC00113	FAM64A	TNNT3	RP11-91J3.3	KRT8P41		SKA3	3.08619	3.37386	6.25581e-98	1.646e-96	MMD	-2.81365	4.93885	4.25916e-300	1.12065e-297		TNXB		ECE2	0.593001	2.14171	1.85266	3.78e-48	7.52e-47	ADIPOQ	196.104	6.69255	-4.87292	1.79e-49	4.12e-48	OR2I1P	3.26366	11.7497	1.84806	2.68e-11	1.05e-10	LRTOMT	3.33825	1.51121	-1.14339	7.85e-35	5.56e-33
ACACB	CTD-2147F2.1	LRRC15	NKAPL	E2F3	SAMD15		NCAPG	3.07183	4.25815	9.07146e-98	2.38339e-96	TNXB	-4.03551	5.42149	5.12589e-299	1.32944e-296		CFL2		SLC22A31	0.12616	0.283732	1.16928	0.0113896	0.0133957	CX3CR1	7.11096	3.32279	-1.09765	9.74e-24	3.84e-23	AC104958.2	0.39056	0.929058	1.25022	3.41e-13	1.63e-12	RF00272	0.485076	0.0937642	-2.3711	8.69e-20	8.34e-19
SLC22A12	ELDR	AC011893.3	GPIHBP1	CNKSR2	C1orf64		SKA1	3.37564	3.05687	1.36647e-97	3.57469e-96	CFL2	-2.2228	4.52343	7.3032e-295	1.86746e-292		NAALAD2		HRASLS	1.12682	2.48868	1.14313	0.0348761	0.0394271	EDA2R	2.63418	1.24781	-1.07796	5.26e-29	2.77e-28	PELI1	6.19354	14.3249	1.20969	8.35e-35	5.87e-33	VAV3	32.489	7.43923	-2.12672	1.62e-38	2.17e-36
AC073850.6	KRT77	HN1	CD34	TTK	RSPH1		GPRIN1	2.89573	3.35126	1.40459e-97	3.6691e-96	NAALAD2	-2.89502	0.975188	4.89815e-293	1.23508e-290		CKMT2		GABRA3	0.0123354	0.282119	4.51543	0.0035389	0.00434168	CA4	9.04163	0.267033	-5.08149	1.46e-64	3.01e-61	NCK2	14.5799	29.2283	1.00338	2.53e-39	4.04e-37	MS4A15	2.21242	0.856998	-1.36826	8.57e-11	3.18e-10
LMOD2	CTA-126B4.7	CTHRC1	SLC17A7	AC011294.3	SLC7A2		CDCA5	3.10091	4.83372	3.27272e-97	8.47593e-96	CKMT2	-3.58153	1.83641	9.64047e-285	2.39757e-282		ASPA		KIF18B	0.255954	2.83533	3.46956	3.56e-58	2.86e-56	THRB	8.64045	3.25614	-1.40794	3e-53	1.05e-51	ANKRD36BP2	0.307987	0.712755	1.21054	6.93e-11	2.61e-10	AL353572.1	0.512683	0.18477	-1.47234	1.27e-15	7.91e-15
ASB5	CXCR2P1	CLSPN	ALPK3	NCAN	CHRD		RAD51	2.59128	3.31179	5.11194e-97	1.32016e-95	ASPA	-3.56049	1.42042	2.52663e-283	6.19877e-281		CAVIN2		CDCA8	1.31096	10.1109	2.94722	5.61e-60	8.7e-58	C14orf180	7.60881	0.270937	-4.81164	2.95e-51	8.03e-50	ARL9	0.889501	4.83892	2.44362	7.18e-26	1.39e-24	FAM234B	19.9667	3.28142	-2.6052	1.6e-35	1.24e-33
GSTM5	PAX1	KIF18A	MYOM3	NMT2	ZNF703		CCNB2	3.04798	4.6272	8.42057e-97	2.15926e-95	CAVIN2	-3.93747	4.52132	1.83832e-282	4.44995e-280		ARHGAP20		CDCA3	0.38168	2.97541	2.96265	1.1e-58	1.06e-56	PODN	25.2049	12.2326	-1.04297	4.76e-17	1.32e-16	LINC02437	0.129827	0.811899	2.64471	9.6e-21	1.03e-19	AC009754.1	0.333387	0.120916	-1.46319	1.79e-14	9.83e-14
RP11-736K20.4	ELAVL2	KPNA2	LRRC39	NFIB	CACNA1H		PRC1	2.65742	5.80071	1.5157e-96	3.8757e-95	ARHGAP20	-3.07215	2.17289	2.93296e-280	7.00631e-278		ALDH1L1		CEP55	0.761486	7.88337	3.37192	6.03e-59	6.41e-57	AC073850.1	4.44477	0.366141	-3.60164	1.95e-52	6.15e-51	AC116614.1	0.293463	1.68763	2.52375	0.00235173	0.00360371	CRACR2A	1.21318	0.58356	-1.05584	2.19e-18	1.79e-17
TIMP4	RP11-1070N10.5	PACSIN1	MCAM	EN1	RP11-150O12.3		GTSE1	3.04752	3.67063	2.86517e-96	7.30579e-95	ALDH1L1	-4.70859	3.21156	6.64153e-277	1.56593e-274		PALMD		LAD1	10.0592	22.4726	1.15965	1.19e-07	1.99e-07	GLRA3	3.1007	1.2549	-1.30503	7.36e-17	2.03e-16	BPI	0.107823	1.85614	4.10557	9.18e-31	3.4e-29	LINC01016	1.32058	0.0594007	-4.47454	2.38e-36	2.13e-34
HSPB7	UCA1	HMGB3	ATOH8	EPHB1	CCDC96		ANLN	3.38231	5.52346	1.1204e-95	2.83298e-94	PALMD	-2.86252	5.40143	1.48874e-276	3.46513e-274		PLIN1		TTK	0.563959	3.84586	2.76964	2.36e-51	6.49e-50	TPO	0.988486	0.373279	-1.40496	5.61e-39	5.45e-38	ALPL	5.67446	14.6258	1.36596	1.94e-11	7.72e-11	RF00334	0.476974	0.155812	-1.61411	1.13e-11	4.64e-11
RP11-583F24.7	RP11-1070N10.7	TPRN	TMEM132C	ACSL6	STARD10		CDCA3	3.0607	3.97223	2.18757e-95	5.50837e-94	PLIN1	-5.28411	7.10394	4.11696e-276	9.46118e-274		GPX3		AC138904.1	0.110321	0.629252	2.51192	7.44e-38	6.58e-37	SCN7A	1.18133	0.394674	-1.58168	1.68e-34	1.21e-33	HRK	0.163462	0.90059	2.46192	8.05e-23	1.08e-21	PCSK2	0.40025	0.0445003	-3.16901	0.00381489	0.00566403
CKM	RP11-319F12.2	BMP8A	DEFB132	CENPW	TP53INP1		EZH2	2.3129	4.72702	3.70898e-95	9.31348e-94	GPX3	-3.67173	7.26075	4.90435e-276	1.11298e-273		FAM13A		AC020928.1	0.103117	0.289432	1.48894	0.00347119	0.00426001	MAB21L1	2.80018	0.449565	-2.63892	4.32e-60	6.95e-58	IGKV1D-12	0.769693	2.04547	1.41007	5.57e-05	0.000106411	CNTD1	1.08321	0.366327	-1.5641	4.05e-28	1.06e-26
RP11-384P7.7	ETV7	SBK1	STARD9	CDCA8	DEGS2		SPAG5	2.81276	5.18268	5.04323e-95	1.26289e-93	FAM13A	-2.42982	4.8194	8.89988e-275	1.97045e-272		GPD1		GCNT3	0.039434	0.256331	2.7005	8.31e-06	1.23e-05	TPPP3	16.0841	7.73168	-1.05678	2.81e-22	1.03e-21	FATE1	0.219018	1.41386	2.69051	3.51e-07	8.71e-07	AC018755.3	0.256432	0.124675	-1.0404	2.77e-10	9.75e-10
MAB21L1	LVCAT1	PLAC1	RP11-1101K5.1	GPSM2	LINC02130		GINS1	2.49338	4.28223	7.40739e-95	1.84473e-93	GPD1	-5.25739	6.42846	4.54396e-274	9.93923e-272		AC009779.3		AARD	6.44967	26.9709	2.0641	1.29e-05	1.89e-05	FAXDC2	13.8339	3.85206	-1.8445	3.7e-54	1.45e-52	ORC1	1.83473	4.42501	1.27011	9.83e-27	2.11e-25	RERG-AS1	0.375235	0.0262911	-3.83515	4.56e-20	4.52e-19
CFD	CASP14	RP11-547D24.1	ATP1A2	CACNG2	DNAAF1		RMI2	2.66414	4.08642	2.1413e-94	5.29635e-93	AC009779.3	-2.29383	0.410875	1.65588e-273	3.57886e-271		MYOZ1		MKI67	1.09246	8.77353	3.00558	1.96e-54	8.03e-53	CCDC158	1.01034	0.340817	-1.56777	5.63e-42	6.64e-41	GMPSP1	0.235191	0.571566	1.28109	3.08e-15	1.83e-14	BPIFB2	15.3217	6.47532	-1.24255	1.29e-26	2.73e-25
CH17-469D17.1	CA9	PROC	MAGI2-AS3	SMR3A	CYP2A6		OIP5	2.44419	1.70278	7.58776e-94	1.85655e-92	MYOZ1	-4.81092	2.69219	4.28499e-273	9.15223e-271		AQP7		C1orf105	0.0118625	0.242257	4.35205	2.28e-14	5.49e-14	AHNAK	207.988	78.3085	-1.40926	8.97e-51	2.35e-49	SH2B2	1.79855	3.95347	1.13628	1.68e-23	2.45e-22	CYB5D1	0.847135	0.422978	-1.00201	2.02e-19	1.86e-18
ACTN3	TLX1	E2F7	FLNC	SOX9-AS1	DNAJC12		NCAPH	2.79746	4.00084	5.49135e-93	1.32927e-91	AQP7	-5.1128	4.04382	8.76025e-273	1.84933e-270		IGFBP6		CA9	0.157568	3.77563	4.58268	0.00149448	0.00188989	PCK1	11.5266	0.45687	-4.65704	4.1e-46	6.68e-45	LAMB3	11.22	24.9913	1.15535	0.000970419	0.0015688	AC078993.1	7.76683	0.297611	-4.70582	2.19e-38	2.85e-36
RP1-302G2.5	VAX1	FAM111B	HHATL	GCNT3	AZGP1P1		FOXM1	3.47762	5.53262	2.74473e-92	6.56528e-91	IGFBP6	-3.22024	4.21228	8.54229e-272	1.78259e-269		FZD4		LINC02446	0.346841	0.956419	1.46337	0.00654984	0.00786125	CPED1	10.4593	1.64194	-2.6713	1.74e-49	4.02e-48	S100A1	14.4378	73.3971	2.34587	2.85e-13	1.38e-12	PRR15	23.788	2.84749	-3.06247	6.2e-46	4.88e-43
PLIN4	KRT18P29	CENPI	GNAI1	ELF5	SPINK4		CENPM	2.81611	3.15574	4.43864e-92	1.05892e-90	FZD4	-2.65014	6.16613	5.30418e-271	1.09429e-268		FBP2		SELL	2.83766	8.655	1.60883	4.58e-11	9.22e-11	PTGER3	9.92509	4.33497	-1.19506	4.58e-23	1.74e-22	TACR1	0.508068	1.09483	1.10761	0.000133853	0.000243123	COLEC12	6.84714	3.05327	-1.16515	2.76e-14	1.48e-13
TUSC5	MCM10	RP11-108L7.15	TGFBR2	FAM3D	RP11-616M22.12		KIF14	3.51155	3.63909	1.27622e-91	3.03667e-90	FBP2	-5.14249	-0.318329	1.46773e-270	2.99401e-268		ABRA		ZFP42	0.0140863	0.478712	5.08679	0.0278902	0.0317556	GPD1	161.569	5.17922	-4.96327	1.89e-53	6.71e-52	NIPAL1	0.623618	1.78089	1.51386	4.54e-26	9.05e-25	CEP126	1.87721	0.547805	-1.77685	6.96e-23	9.44e-22
BTNL9	SCRT2	MND1	DST	PPARA	SLC39A6		DEPDC1B	2.94481	2.67744	1.55806e-91	3.70242e-90	ABRA	-6.73684	-0.587601	8.07092e-270	1.62808e-267		LMOD3		RAD54L	0.382907	2.49329	2.70299	6.83e-53	2.26e-51	AC007637.1	1.03681	0.471287	-1.13747	1.13e-32	7.31e-32	AC034105.1	0.432835	1.4156	1.70953	0.000330118	0.000569478	AC005077.4	3.45302	0.852355	-2.01833	5.97e-34	3.75e-32
AGAP11	CBS	RAD51AP1	CPED1	C10orf90	PCSK4		TOP2A	3.50576	7.33886	8.13912e-91	1.91406e-89	LMOD3	-5.1522	0.958723	2.23846e-268	4.46584e-266		PDE3B		CCNB2	1.22311	9.44081	2.94835	3.07e-57	2.03e-55	FHL5	4.7506	0.849096	-2.48411	3.68e-52	1.12e-50	AP000251.1	0.763297	1.90479	1.31931	2.64e-14	1.42e-13	CHST8	4.04459	1.21441	-1.73573	5.01e-11	1.91e-10
AADAC	LINC01194	RHPN1	CES1	STMN1	RNU6-813P		CDC20	3.5459	5.32157	8.53833e-91	2.00535e-89	PDE3B	-3.74997	3.97299	5.90917e-268	1.1661e-265		PLIN4		IGHG1	69.9382	620.079	3.1483	1.67e-11	3.45e-11	LUZP2	0.7881	0.19128	-2.04269	1.5e-35	1.15e-34	AMD1	10.2467	22.2363	1.11776	4.69e-32	2.21e-30	MLPH	55.4296	6.80977	-3.02498	1.48e-49	3.23e-46
AQP7P2	KB-173C10.2	ADAM8	GOLGA8M	GFI1B	RP3-443C4.2		FAM83D	3.51369	4.25941	1.75404e-90	4.08788e-89	PLIN4	-5.12765	7.94707	7.88126e-266	1.53854e-263		ADAMTS5		ULBP2	0.313465	1.03383	1.72162	2.25e-10	4.37e-10	KCNJ12	0.746189	0.344021	-1.11705	1.99e-28	1.01e-27	PADI2	10.6462	53.7652	2.33634	2.73e-34	1.81e-32	ARNT2	9.71064	4.38498	-1.147	6.03e-11	2.28e-10
SLC16A12	CASC9	ORC6	ECM2	SEMG2	RP11-496I9.1		HAGHL	3.43342	3.61451	2.0615e-90	4.79212e-89	ADAMTS5	-3.05596	4.61908	9.49901e-266	1.83462e-263		GPR146		STIL	0.653777	2.67124	2.03064	1.32e-47	2.49e-46	LRRN4CL	8.27879	0.9161	-3.17584	9.4e-60	1.31e-57	ASS1	29.7544	64.4586	1.11527	3.89e-21	4.34e-20	CACNA1D	2.95065	0.648346	-2.1862	3.73e-30	1.28e-28
CD36	FAM72D	AUNIP	TRIM63	CCL20	FAM196A		BIRC5	3.55937	5.56816	4.49048e-90	1.03721e-88	GPR146	-2.74462	0.907587	1.00841e-265	1.92712e-263		SLC19A3		AL157373.2	0.110201	0.261882	1.24878	0.000515371	0.000674637	ABLIM3	13.7398	5.33881	-1.36377	8.82e-35	6.45e-34	PAK1IP1	10.7104	21.6833	1.01758	2.48e-31	1.02e-29	KRT8P41	0.326986	0.0383628	-3.09145	8.29e-30	2.7e-28
NNAT	SPRR4	OR2B6	HFE2	HEPHL1	FSIP1		RECQL4	2.7972	4.87354	7.09656e-90	1.63293e-88	SLC19A3	-4.99086	4.2136	2.24333e-265	4.19872e-263		ASB11		DLX5	0.250114	1.34088	2.42253	3.11e-15	7.86e-15	CMYA5	9.67249	2.65944	-1.86276	2.06e-15	5.25e-15	LINC01615	0.599631	1.26839	1.08085	6.44e-07	1.55e-06	LINC00504	3.54294	0.184649	-4.26209	1.14e-48	2.05e-45
LIPE	OLIG1	EPYC	MLXIPL	LINC01324	RARA		ESPL1	2.73523	4.22982	7.21286e-90	1.65759e-88	ASB11	-6.24619	-1.81949	3.01303e-265	5.5818e-263		KIAA0408		DLGAP5	0.572561	5.29528	3.20921	2.03e-57	1.4e-55	CASQ1	9.93194	0.895404	-3.47146	0.0260436	0.0297479	AC021146.12	0.205517	0.495378	1.26927	1.89e-12	8.38e-12	ERBB4	5.17938	0.37664	-3.78152	2.68e-43	1.15e-40
APOB	LINC01179	CDT1	CXorf36	GABRA5	SLC7A13		MKI67	3.09194	6.6879	1.26656e-89	2.89967e-88	KIAA0408	-4.42367	-2.14938	1.03597e-262	1.8998e-260		MTURN		AL355312.3	0.0919088	0.444905	2.27522	6.73e-11	1.34e-10	AC023421.1	0.928274	0.459353	-1.01495	9.9e-25	4.11e-24	PRAC2	0.4617	1.05877	1.19736	7.13e-07	1.71e-06	NTAN1P2	0.746601	0.363159	-1.03974	4.49e-23	6.2e-22
RP11-626H12.1	TYMS	HES6	DMD	APBA1	TRH		CENPU	2.37444	4.6548	2.34166e-89	5.3341e-88	MTURN	-2.50559	5.95349	9.89266e-259	1.79601e-256		TNNI2		EIPR1-IT1	0.0820261	0.336013	2.03436	2.82e-21	9.82e-21	LRRN3	2.74766	0.642545	-2.09634	1.84e-46	3.11e-45	AC245517.5	0.196838	0.82429	2.06614	2.76e-07	6.92e-07	RPL36AP43	1.458	0.675655	-1.10963	1.44e-13	7.19e-13
CTD-2521M24.11	MELK	RP11-703I16.3	AQP7P2	KCNMB2	ROPN1L		CCNA2	2.87146	4.61214	8.45496e-89	1.90446e-87	TNNI2	-4.94705	2.87646	1.07209e-257	1.92711e-255		KLHL33		AURKB	0.668507	6.53145	3.28839	7.38e-56	3.8e-54	CADM2	0.662301	0.303553	-1.12554	6.45e-28	3.19e-27	USP32P3	0.155054	0.563147	1.86074	1.1e-07	2.87e-07	RN7SL477P	0.360265	0.139808	-1.36561	2.02e-08	5.72e-08
TMEM252	PAGE2	LAMP5	MME	TRIM2	FAM234B		SLC24A2	4.93522	2.51192	9.87991e-89	2.22267e-87	KLHL33	-3.96369	-2.07458	2.37678e-257	4.23043e-255		SVEP1		COL22A1	0.157795	1.22062	2.95149	1.57e-26	7.21e-26	ANGPTL1	7.9796	1.07952	-2.88593	6.17e-56	3.19e-54	PROX1	0.221759	0.672609	1.60077	2.58e-08	7.23e-08	AC087442.1	0.389048	0.190666	-1.0289	0.000638633	0.00105897
LOC100421166	MAGEA3	GINS2	MRAP	RP11-343B18.2	MALRD1		C1QTNF6	2.21653	5.51808	3.31284e-88	7.3797e-87	SVEP1	-3.26465	5.53804	3.15122e-257	5.55441e-255		TMEM37		PCSK1N	0.505776	3.50297	2.79201	0.00168791	0.00212539	ZNF423	2.55765	1.20174	-1.0897	3.52e-36	2.81e-35	SERPINB2	0.443114	2.4563	2.47074	5.01e-05	9.63e-05	RAB27B	11.8263	3.05526	-1.95263	1.16e-39	2.02e-37
FBXO40	CTA-384D8.35	DIAPH3	FITM1	LINC01694	RP11-459E5.1		AURKB	3.39138	3.76927	6.19092e-87	1.36073e-85	TMEM37	-2.96302	4.087	3.33745e-253	5.82609e-251		MYBPC2		BIRC5	1.22072	13.319	3.44768	3.93e-56	2.08e-54	SLC14A2	0.734281	0.203724	-1.84971	1.76e-33	1.2e-32	OR7E62P	0.411897	1.66074	2.01147	1.02e-14	5.75e-14	MIR744	0.318284	0.0872454	-1.86716	3.1e-09	9.69e-09
PGM5-AS1	RP11-350J20.12	FAM72D	LIFR	VLDLR-AS1	DCDC1		ESCO2	2.71155	2.92897	1.66429e-86	3.64039e-85	MYBPC2	-5.71132	2.07398	3.85531e-253	6.66602e-251		CCDC69		AC092718.4	2.12798	5.98572	1.49204	7.57e-32	4.67e-31	SEMA6D	3.86153	1.20464	-1.68057	1.06e-50	2.74e-49	AC015712.6	0.289272	0.834187	1.52794	1.09e-18	9.24e-18	CALCR	0.232677	0.057601	-2.01416	3.96e-10	1.37e-09
RP11-627G23.1	RP1-65P5.5	SYNGR3	CACNA1S	RNASE10	CTD-2547L24.4		CENPA	3.28009	2.93691	4.08544e-84	8.66485e-83	CCDC69	-2.9043	5.19944	1.49631e-252	2.56279e-250		LEP		C2orf48	0.0393226	0.357932	3.18626	1.93e-36	1.56e-35	ACSM5	5.12288	0.45621	-3.48918	6.21e-54	2.38e-52	TMEM158	3.66386	16.2897	2.15252	2.6e-22	3.31e-21	AC140134.1	0.266205	0.0987175	-1.43116	4.64e-19	4.1e-18
TMEM132C	PRDM13	CEMIP	LHFP	GPM6B	GREB1		CILP2	3.45413	4.04047	5.05045e-84	1.06991e-82	LEP	-6.1208	5.28972	1.9763e-252	3.35324e-250		GPBAR1		TNFRSF9	0.0925553	0.599032	2.69425	7.48e-41	8.24e-40	CTTNBP2	1.6143	0.748159	-1.10949	1.09e-44	1.58e-43	PLA2G4A	1.30401	6.85069	2.39329	1.37e-16	9.38e-16	CYP2C8	0.507365	0.232135	-1.12806	0.0206039	0.0273832
LINC02066	RP11-169F17.1	CFAP45	ANGPTL8	RP11-120J1.1	SLC4A8		ESM1	2.95454	3.41659	5.98047e-84	1.26398e-82	GPBAR1	-2.92568	0.173779	1.10975e-251	1.86551e-249		SCARA5		C2CD4D	0.502068	1.28751	1.35862	2.06e-18	6.17e-18	KLHDC1	2.39113	1.16367	-1.03901	5e-40	5.2e-39	SLC16A10	0.146602	0.572074	1.96429	6.96e-28	1.78e-26	GLUL	160.218	72.268	-1.1486	4.1e-28	1.07e-26
ZBTB16	RP4-697P8.3	TFR2	KLF4	TMEM72	KCNK15		COMP	4.56076	7.05263	6.59546e-84	1.39233e-82	SCARA5	-5.06302	3.83056	9.70664e-251	1.61673e-248		CHRDL1		TAP1	11.4363	33.8538	1.5657	2.86e-26	1.29e-25	PDK4	120	11.9016	-3.3338	1.81e-56	1.02e-54	LRRC37A4P	0.325635	0.691915	1.08734	1.31e-17	9.96e-17	FMN1	1.65701	0.689222	-1.26554	3.83e-21	4.28e-20
RP11-1101K5.1	NDC80	ZNF695	ANGPTL1	NCOA7	RP3-453C12.15		MTFR2	2.83529	2.0232	9.79037e-84	2.05485e-82	CHRDL1	-4.42026	5.6058	3.15166e-249	5.20167e-247		ABCA9		PPP1R14B	15.8355	45.2484	1.5147	2.73e-44	3.83e-43	CAVIN2	44.2802	3.23429	-3.77514	9.47e-66	4.4e-62	RASSF4	2.62057	6.86544	1.38947	8.62e-23	1.15e-21	MYCBPAP	0.293497	0.117712	-1.31809	2.6e-15	1.56e-14
AP000445.1	ACAN	ECE2	MAMDC2	MOB3B	LINC01238		GJB2	4.29572	5.44121	1.27907e-83	2.68146e-82	ABCA9	-3.60392	3.40486	6.21909e-248	1.0081e-245		FXYD1		CDC45	0.57982	4.05798	2.80708	1.06e-51	3.04e-50	MYL7	1.30597	0.554198	-1.23665	1.67e-20	5.6e-20	AC090409.1	0.159172	0.422383	1.40797	2.55e-05	5.07e-05	AL590666.2	2.05804	0.630174	-1.70745	1.2e-09	3.94e-09
PCK1	SHISA8	TMEM132A	LINC02185	CTD-3064H18.4	CTD-2015H6.3		DEPDC1	3.2585	3.78645	1.51731e-83	3.17359e-82	FXYD1	-3.56942	0.305198	1.80068e-245	2.89304e-243		PPP1R12B		GAL	0.49059	2.85655	2.54168	0.0120848	0.0141848	ZCCHC24	21.9023	8.27515	-1.40423	4.73e-43	6.03e-42	ETV7	2.46887	5.73295	1.21543	8.89e-13	4.07e-12	MIR4728	1.44285	0.389515	-1.88917	7.06e-07	1.69e-06
CIDEC	SGO1	OLR1	LGI4	TMEFF1	CFAP57		SHCBP1	2.61139	3.61003	1.25024e-82	2.59407e-81	PPP1R12B	-2.08034	6.04058	9.06889e-245	1.44426e-242		NRAP		GTSF1	0.144292	0.559175	1.95431	5.32e-09	9.56e-09	MYMX	4.76183	0.503631	-3.24108	5.39e-39	5.25e-38	ROPN1B	0.39724	6.03064	3.92423	1.35e-33	7.8e-32	PCDHA3	0.229362	0.111082	-1.046	4.72e-08	1.29e-07
CD300LG	PGLYRP4	RP11-742B18.1	CORO2B	C4orf51	MEIS3		ADAMTS14	3.09255	2.77524	1.63501e-82	3.38467e-81	NRAP	-7.27823	3.40944	2.4433e-243	3.85723e-241		MYLK2		CXCL10	4.14809	52.4052	3.65919	1.96e-42	2.4e-41	C1QTNF7	2.31653	0.483421	-2.26061	3.68e-37	3.1e-36	CLTRN	0.705947	2.05495	1.54147	2.93e-12	1.27e-11	MIR342	0.547777	0.212467	-1.36635	1.07e-12	4.84e-12
ANGPTL8	KRT34	MATN3	CIDEA	FANCA	CST4		CENPE	2.61962	4.34669	1.72628e-82	3.56956e-81	MYLK2	-4.3495	0.469347	2.81065e-243	4.3989e-241		AL845331.2		LHX2	0.0172529	0.325747	4.23884	3.95e-38	3.58e-37	CMA1	4.99641	0.714986	-2.80491	2.02e-44	2.85e-43	KCNE5	0.122754	1.56212	3.66967	2.04e-15	1.24e-14	SSPO	0.304292	0.137191	-1.14928	9.3e-13	4.24e-12
MYL1	FAM230C	ADM2	RP11-481H12.1	IGF2BP3	RP11-498B4.5		E2F1	2.66594	4.52175	2.08634e-82	4.29938e-81	AL845331.2	-5.17752	-1.4	5.22482e-243	8.1074e-241		FRMD1		HMGA1	22.7646	64.1009	1.49355	9.68e-37	7.96e-36	ATP5PBP5	2.11908	0.931306	-1.18611	6.09e-37	5.06e-36	TRIP13	5.16098	11.3102	1.13191	1.64e-18	1.36e-17	RNU6-1209P	0.457756	0.181194	-1.33705	5e-10	1.71e-09
HRASLS5	ULBP1	FOXP3	SMTNL1	TNIP3	NCAM2		CDC45	2.90366	3.44325	2.35737e-82	4.85238e-81	FRMD1	-4.31666	-0.254803	1.16422e-242	1.79122e-240		LEPR		ANLN	0.836109	8.30458	3.31214	8.28e-57	4.98e-55	AP001528.3	8.57025	0.830675	-3.36698	1.47e-60	2.96e-58	MIA	1.53074	13.8863	3.18136	5.22e-29	1.52e-27	AC007490.1	1.60433	0.372225	-2.10773	4.57e-28	1.19e-26
RP11-561I11.3	PRM1	IL4I1	CDH20	RAD51AP1	LINC01117		CCL11	4.15847	0.513132	5.34476e-82	1.09273e-80	LEPR	-2.95514	4.29769	2.6224e-242	4.00081e-240		MYZAP		2020-09-03	1.63446	3.82679	1.22732	0.00302644	0.00373144	FMOD	93.6582	44.3634	-1.07804	2.99e-34	2.13e-33	OXGR1	0.3027	1.91243	2.65945	6.1e-17	4.34e-16	PEBP4	2.1215	0.327379	-2.69605	1.47e-11	5.92e-11
AVPR2	CCNA2	HCN2	XIRP1	RASD2	RIBC1		UBE2S	2.5241	4.53586	6.0759e-82	1.23942e-80	MYZAP	-3.20469	2.33318	2.87358e-242	4.34748e-240		MYOZ2		MORN3	0.377546	1.10777	1.55294	6.72e-26	2.96e-25	CITED1	10.5006	2.88466	-1.86399	2.53e-26	1.14e-25	MAP7D3	1.05309	2.3243	1.14217	1.37e-17	1.04e-16	AC034206.1	0.81701	0.0787181	-3.37559	2.62e-09	8.24e-09
SGCG	DCAF8L1	RIPPLY3	ABCA6	PPARGC1A	TFF3		RAD54L	2.78828	2.89384	7.62643e-82	1.55222e-80	MYOZ2	-4.78093	-0.49655	4.41823e-242	6.62916e-240		TRDN		FOXD1	0.0962404	0.7221	2.90748	0.000159702	0.000216687	AP003481.1	0.959895	0.241217	-1.99255	7.16e-25	3e-24	TPTEP2	0.428037	0.880035	1.03982	7.57e-19	6.54e-18	SNORA13	2.0593	0.476107	-2.1128	4.5e-07	1.1e-06
RP11-96C23.13	GTSE1	SLC16A3	RP11-71E19.1	RP11-351J23.1	SUSD3		KIF15	2.5497	3.62905	3.97862e-81	7.99025e-80	TRDN	-6.21982	2.28894	1.9442e-241	2.8932e-239		OXTR		F5	0.241315	0.548952	1.18576	6.95e-08	1.17e-07	TPPP	4.21851	1.78511	-1.24072	3.98e-37	3.35e-36	CCL20	0.633745	2.6148	2.04473	2.66e-24	4.28e-23	ITIH2	0.458241	0.118867	-1.94675	2.07e-05	4.18e-05
EGR3	AC011294.3	RP11-429J17.7	PPP1R1A	MIR4653	STMND1		BGN	2.34697	9.5607	8.4281e-81	1.68701e-79	OXTR	-4.08854	5.1487	2.56031e-241	3.77906e-239		HBA2		CHEK1	1.02471	2.87672	1.48921	2.97e-40	3.14e-39	SLC1A7	0.641761	0.220778	-1.53944	2.97e-29	1.58e-28	MIR6772	0.21632	0.882697	2.02875	1.12e-13	5.67e-13	KCND3	3.40436	0.853586	-1.99577	5.75e-23	7.89e-22
MS4A6E	RP11-595B24.2	HIST1H3J	AC003986.6	STIL	KLHDC1		IQANK1	2.22186	5.82162	1.65194e-80	3.28848e-79	HBA2	-4.43616	2.41556	8.82248e-240	1.29171e-237		CD300LG		ICOS	0.255337	0.958027	1.90766	2.61e-14	6.26e-14	AC124312.2	1.38004	0.618361	-1.15819	1.68e-26	7.68e-26	VIM-AS1	1.15581	4.47569	1.9532	2.26e-31	9.41e-30	AC114501.1	0.922442	0.0675054	-3.77238	2.75e-11	1.08e-10
ASB15	GBX2	CDC25A	SHE	TMEM158	CRIP1		RDM1	3.04077	0.063489	4.11806e-80	8.13529e-79	CD300LG	-4.99279	3.41859	4.25158e-239	6.17499e-237		PFKFB1		MYBL1	0.678277	2.89494	2.09359	2.41e-23	9.33e-23	RNASE4	2.46983	1.10963	-1.15433	5.85e-34	4.09e-33	APOBEC3B	4.36724	14.6837	1.74942	8.28e-08	2.2e-07	RNU6-863P	0.30135	0.0562815	-2.42071	1.72e-12	7.63e-12
ACSM5	GAL	PRR36	MUSTN1	CHEK1	C10orf82		POLQ	2.61959	3.0982	2.49671e-79	4.88445e-78	PFKFB1	-3.55026	1.61709	5.27062e-239	7.59429e-237		CASQ1		LTA	0.192672	0.693022	1.84675	5.53e-16	1.45e-15	ADH1B	186.616	6.65519	-4.80945	9.91e-57	5.91e-55	UBE2E3	10.4731	23.521	1.16725	2.06e-36	1.87e-34	LINC01087	3.78815	0.0765309	-5.62931	2.68e-38	3.4e-36
PLIN1	NUF2	AP001434.2	AC004490.1	IL34	C16orf71		MYBL2	3.84273	5.85445	2.59939e-79	5.07986e-78	CASQ1	-4.7261	2.69274	3.70445e-238	5.25424e-236		HCAR2		DNMT3B	0.806288	2.21954	1.4609	4.08e-27	1.94e-26	GRIK1-AS1	1.74749	0.551638	-1.66349	1.65e-22	6.1e-22	GALNT12	1.05092	2.19385	1.06182	2.23e-08	6.31e-08	SLC1A1	14.6736	2.99635	-2.29194	1.5e-09	4.84e-09
LINC00844	KRT78	LINC00466	RP3-414A15.12	FOXM1	LINC01116		PIMREG	3.05232	2.91352	3.00883e-79	5.87369e-78	HCAR2	-3.40006	1.75743	7.75051e-238	1.09078e-235		HEPACAM		ZBED2	0.0950538	0.572245	2.58982	5.25e-19	1.63e-18	ACACB	23.7064	2.25608	-3.39339	3.75e-57	2.44e-55	SERPINB3	0.247825	1.9384	2.96747	7.74e-14	3.98e-13	LRG1	19.515	7.03054	-1.47288	1.5e-17	1.13e-16
RP3-414A15.12	CSAG1	ISG15	RP11-100L22.1	RP11-159H10.3	PREX1		CTXN1	2.87457	4.65713	8.65873e-79	1.68076e-77	HEPACAM	-5.21662	0.192277	9.08867e-238	1.26927e-235		DMGDH		CDC20	1.94117	20.8241	3.42325	4.6e-57	2.94e-55							SPART-AS1	0.200122	0.413973	1.04866	8.56e-10	2.85e-09	DNAH5	1.54052	0.275823	-2.4816	6.79e-34	4.18e-32
CPA1	RP11-54H7.4	AC009005.2	GIPC2	SPAAR	RP11-53O19.2		LRRC15	3.8107	7.12491	1.79867e-78	3.45919e-77	DMGDH	-2.74292	1.13265	1.05153e-236	1.45729e-234		RBP4		TUBB3	0.0746416	0.903158	3.59693	6.57e-47	1.16e-45							APBA1	0.533416	1.52464	1.51513	2.5e-13	1.22e-12	HOXB-AS1	2.16185	0.645585	-1.74359	1.42e-27	3.51e-26
RXRG	PRSS41	CXCL11	PGM5P3-AS1	PSMD10P2	TCEAL3		IBSP	8.04121	2.70237	2.17316e-78	4.17499e-77	RBP4	-4.83842	4.95362	3.34193e-236	4.59642e-234		EPB42		MKRN3	0.0390024	0.276724	2.82681	1.05e-06	1.65e-06							HOXA1	0.290481	0.630237	1.11745	6.1e-14	3.17e-13	SEMA3C	31.2049	10.1382	-1.62197	2.9e-29	8.74e-28
LHCGR	FSD1	HIST1H2BE	RBMS3	NDC80	LMNTD2		MMP13	6.27454	4.98125	6.87335e-78	1.31353e-76	EPB42	-3.55191	-0.928769	7.4092e-235	1.01138e-232		SPX		LAIR2	0.126048	0.34546	1.45455	9.43e-06	1.39e-05							AL353150.1	0.443753	1.05723	1.25246	0.000579216	0.000966639	KAT6B	7.71038	2.88159	-1.41994	1.97e-30	6.99e-29
CLDN5	MMP1	ITPKA	ATP1B4	CENPA	RP11-616M22.7		CTHRC1	2.42462	6.54819	1.08967e-77	2.07368e-76	SPX	-5.20016	2.34135	1.06348e-232	1.44086e-230		ADRA1A		FAM72B	0.0879614	0.448136	2.34899	6.16e-39	5.97e-38							RSPO4	0.311759	1.44386	2.21143	7.16e-15	4.08e-14	AC036108.1	0.298018	0.131206	-1.18357	1.43e-06	3.3e-06
ATP1A2	CBX2	E2F8	MURC	RP11-206P5.2	PARD6B		CLSPN	2.87977	3.03329	2.56513e-77	4.86117e-76	ADRA1A	-4.41567	-0.220454	2.08902e-232	2.80934e-230		CD36		GSDMC	0.371782	1.37191	1.88365	0.00209961	0.0026244							BAG2	1.15699	2.87165	1.31151	1.97e-12	8.68e-12	AL356311.1	3.85438	0.0745481	-5.69218	2.62e-43	1.14e-40
ADAM33	MMP12	CD80	PGM5P4	PTX3	KRT37		CNIH2	3.33799	2.30142	2.63083e-77	4.98048e-76	CD36	-4.17599	7.83628	4.97914e-232	6.64679e-230		MOCS1		KIF20A	0.822352	8.09686	3.29953	1.23e-57	8.88e-56							ID4	7.71384	25.807	1.74224	1.86e-14	1.02e-13	CIB3	1.14327	0.15488	-2.88395	1.52e-34	1.03e-32
SDPR	KRT86	C9orf116	HIF3A	RP11-440G9.1	CAPN8		TTK	2.86932	4.02618	3.00128e-77	5.67585e-76	MOCS1	-2.14994	4.34018	2.15206e-230	2.85188e-228		MAP1LC3C		IGHG2	71.3551	259.545	1.8629	5.97e-05	8.36e-05							CD19	0.670381	2.1251	1.66448	8.32e-07	1.98e-06	RF01241	0.79977	0.293512	-1.44616	1.6e-23	2.35e-22
DEFB132	RP11-347E10.1	CXCL10	AC011738.4	CHST3	CDC20B		KIF26B	2.80557	5.15119	4.66147e-77	8.78806e-76	MAP1LC3C	-3.71518	0.154432	2.76994e-230	3.64407e-228		TIMP4		AL023803.2	0.0301741	0.339017	3.48998	2.93e-45	4.42e-44							SMCO4	8.91675	22.9175	1.36186	1.31e-42	4.43e-40	CREB3L4	55.4357	25.5122	-1.11963	4.16e-25	7.34e-24
CCL16	DPPA2	TNFRSF18	RP11-64C12.1	TRPM6	AKR7L		JPT1	2.20742	6.87359	1.32949e-76	2.49348e-75	TIMP4	-4.49857	3.79421	6.8655e-229	8.96713e-227		DDR2		KRT75	0.0483726	0.845602	4.12772	0.000489884	0.000642269							TNFRSF13C	0.66356	1.97188	1.57127	4.71e-20	4.66e-19	TFF3	251.649	17.5141	-3.84482	6.69e-44	3.29e-41
RP11-92A5.2	FOXG1	AC112721.1	RP11-1024P17.1	GPRC5B	KCTD6		TRIP13	2.5739	4.37732	4.40197e-76	8.13826e-75	DDR2	-2.63287	6.27138	8.21016e-229	1.06468e-226		ANGPT4		SKA1	0.310971	3.04306	3.29067	1.7e-57	1.2e-55							MRPL2	9.72894	21.7302	1.15935	2.68e-30	9.37e-29	SNORA2A	1.28054	0.512032	-1.32244	0.00164828	0.00258024
ITIH2	MAGEA10	FAM72B	PDLIM3	RP11-475O23.2	LINC01863		MAD2L1	2.17461	4.63332	4.44111e-76	8.19393e-75	ANGPT4	-3.38024	-0.310732	5.75787e-228	7.41376e-226		PCOLCE2		FCRLA	0.304666	0.70782	1.21615	0.0012698	0.00161566							FAM131C	0.192429	0.848078	2.13987	1.47e-15	9.06e-15	HOXD-AS2	0.609295	0.282916	-1.10676	3.71e-15	2.19e-14
CACNA1S	PCSK1N	HIST1H2BH	ALDH2	KCNJ2-AS1	CIB3		KPNA2	2.16566	7.28861	1.10206e-75	2.02509e-74	PCOLCE2	-4.56532	4.14057	7.65874e-228	9.79186e-226		CD34		SLC22A20P	0.104792	0.241738	1.20592	0.00312423	0.00384792							ROCR	1.7346	17.7506	3.3552	2.35e-28	6.38e-27	DNALI1	11.9568	1.29811	-3.20335	2.81e-43	1.17e-40
KIF18BP1	AMTN	DQX1	RP11-138I17.1	NDRG2	FGD3		KIF18A	2.42851	3.14401	3.0021e-75	5.46671e-74	CD34	-2.10681	6.49761	4.88896e-227	6.20693e-225		NMUR1		C5orf46	1.09889	3.59981	1.71188	4.42e-06	6.67e-06							BCL2L10	0.249149	0.829602	1.73541	5.1e-21	5.62e-20	CAPN9	4.12904	0.925623	-2.15731	9.22e-26	1.77e-24
ANKRD29	DEPDC1	C2orf48	BMX	NFE2L3	SIAH2-AS1		EME1	2.62122	2.42963	5.97604e-75	1.08495e-73	NMUR1	-3.43525	0.340167	5.35083e-226	6.74614e-224		C1QTNF9		AL645608.7	0.488648	1.08466	1.15037	0.000295718	0.000393281							IGKV5-2	3.71101	27.0514	2.86582	0.0011997	0.0019149	RF00406	2.95547	0.117466	-4.65307	9.53e-48	1.25e-44
MYH7	SERPINB11	PRRT3	AC093110.3	CCL25	VN1R48P		FN1	2.88389	12.2219	1.1635e-74	2.10601e-73	C1QTNF9	-3.6555	-1.38043	9.84175e-226	1.23226e-223		ADH1A		INAVA	0.782084	2.1884	1.48448	0.0363612	0.0410386							FCER2	0.405953	1.34755	1.73095	0.000214833	0.000380341	AC009283.1	11.9359	3.79454	-1.65331	1.82e-11	7.29e-11
GLYAT	CABP7	KIAA1211	MASP1	CTD-2308N23.2	HID1		CLEC5A	3.26943	2.77057	1.46467e-74	2.64852e-73	ADH1A	-4.74715	-1.50934	1.37233e-225	1.70648e-223		G0S2		HASPIN	0.289197	1.1334	1.97054	2.98e-41	3.35e-40							PDCD1	0.880588	2.09236	1.24859	4.96e-09	1.52e-08	AC092979.1	1.99546	0.0118531	-7.39531	6.44e-10	2.17e-09
KLHL40	RPL23AP11	ATP5G1P4	RP11-116B13.1	RP11-417L14.1	RP11-379F12.4		PACSIN1	2.70753	2.23209	2.12847e-74	3.84119e-73	G0S2	-4.02933	5.05044	2.7403e-224	3.38436e-222		TCAP		KLHDC7B	1.0412	7.57697	2.86338	9.83e-08	1.65e-07							CP	9.14806	21.5275	1.23464	2.04e-11	8.09e-11	NRXN3	0.350425	0.114924	-1.60842	4.68e-13	2.21e-12
RP11-96C23.14	ZNF695	CDKN2B-AS1	CXCL2	MEX3A	CCDC24		PLAC1	4.67851	0.487131	2.54727e-74	4.57425e-73	TCAP	-4.72777	3.0257	1.00328e-223	1.23071e-221		ACTN2		PNOC	0.189086	0.402096	1.0885	0.0275515	0.0313854							KRT6C	0.292719	1.60774	2.45744	9.94e-17	6.92e-16	PDE8B	1.78751	0.79043	-1.17724	1.61e-11	6.46e-11
LRRN3	MYBL1	CREB3L1	TSPAN7	LRP8	RAB17		HMGB3	2.43506	6.34118	3.1969e-74	5.72385e-73	ACTN2	-5.9649	4.21064	3.67623e-223	4.47933e-221		ANKRD53		PCAT6	2.38585	7.11302	1.57596	9.18e-35	6.71e-34							IGHV3-33	31.1818	97.2966	1.64168	1.35e-06	3.13e-06	NBPF4	0.983721	0.163663	-2.58752	5.25e-09	1.6e-08
LINC00671	IQGAP3	LINC00176	RP11-679B19.1	ST18	CCDC74B		MCM10	3.15441	3.82186	2.32934e-73	4.10974e-72	ANKRD53	-2.67923	0.246642	7.96128e-223	9.6358e-221		COX6A2		AC103740.2	0.124649	0.336205	1.43147	0.000575722	0.000751468							AC006946.3	0.259239	0.690378	1.4131	7.44e-12	3.1e-11	SGMS1-AS1	0.611824	0.296496	-1.0451	5.05e-26	9.99e-25
RP11-407P15.2	COL9A3	RHBDL1	SGCA	BCL2A1	CCDC74A		ARHGAP11A	2.23711	4.46164	4.38316e-73	7.70342e-72	COX6A2	-6.26925	0.344372	1.09924e-222	1.32163e-220		LRRN4CL		CXCR2P1	0.134352	1.32672	3.30377	1.29e-16	3.51e-16							KCTD14	1.24234	6.07841	2.29064	2.75e-09	8.65e-09	PREX1	37.4606	9.34316	-2.00339	1.61e-32	8.1e-31
LCN6	DIAPH3	AC112721.2	ANK2	ACSM3	TACC1P1		SBK1	2.28318	5.36725	5.72336e-72	9.96237e-71	LRRN4CL	-3.32744	2.06979	1.56003e-221	1.86331e-219		DHRS7C		LAG3	0.539753	2.14122	1.98806	8e-15	1.97e-14							IGLV3-1	58.2551	184.742	1.66506	2.67e-08	7.5e-08	ANOS1	4.78512	2.04007	-1.22994	4.37e-23	6.05e-22
RP11-930P14.1	COL9A1	DNASE1L2	SPTB	SH3PXD2A-AS1	THPO		BMP8A	2.41613	0.419054	6.42716e-72	1.1166e-70	DHRS7C	-7.44028	-2.41227	3.97642e-221	4.71843e-219		NKAPL		DHDH	0.372451	0.979651	1.39522	1.17e-11	2.43e-11							TIGD2	3.29486	7.39055	1.16547	2.1e-32	1.05e-30	TAPT1	6.05987	2.91862	-1.054	8.07e-35	5.69e-33
ADH1B	IDO1	HIST2H2BC	RP11-464C19.3	RP11-347E10.1	CYSRT1		TLCD1	2.44303	3.74509	3.34715e-71	5.75995e-70	NKAPL	-2.69118	-0.83676	1.11062e-220	1.3093e-218		CDO1		AC006329.1	1.23046	3.28271	1.41569	8.49e-16	2.21e-15							RHOXF1-AS1	0.262808	0.900344	1.77647	4.28e-05	8.31e-05	RETREG1	12.056	2.70009	-2.15868	7.8e-32	3.55e-30
PTENP1-AS	SLC1A6	HIST2H4A	SAMD5	SPINK6	LRRC56		TPRN	2.02166	5.35267	3.36276e-71	5.78134e-70	CDO1	-3.61238	3.1799	5.0321e-220	5.89405e-218		DPT		MCEMP1	0.0822475	0.223567	1.44266	1.73e-10	3.38e-10							AL590094.1	0.461755	1.12077	1.27929	1.8e-12	7.98e-12	ELP2	22.9773	7.66479	-1.58389	1.02e-25	1.96e-24
RP11-100L22.1	RP11-308B16.2	TYMSOS	ANGPT1	PDE1C	RP11-428K3.1		FAM111B	2.81174	4.66195	5.14023e-71	8.78728e-70	DPT	-3.4537	6.20858	6.52042e-220	7.58835e-218		CCDC3		CHST6	0.102261	0.436097	2.0924	4.72e-21	1.62e-20							FBXO17	1.53303	3.16362	1.04519	3.64e-08	1.01e-07	AP001010.1	0.382043	0.184915	-1.04687	5.97e-09	1.8e-08
NPY2R	Six3os1_1	LINC01929	FHL5	GSDMC	SNORA42		E2F7	2.88251	2.48567	6.53017e-71	1.11424e-69	CCDC3	-2.80457	4.95258	7.65615e-220	8.85333e-218		SCN4A		AC103702.2	0.0146728	0.281538	4.26211	1.51e-19	4.8e-19							LYNX1	2.71774	6.23178	1.19724	6.83e-11	2.57e-10	HMGCS2	30.4437	8.63171	-1.81843	1.05e-16	7.26e-16
MLXIPL	RP11-326K13.2	HIST1H2AD	PALM2-AKAP2	LINC00987	HPX		TONSL	2.11378	4.62425	7.26525e-71	1.23618e-69	SCN4A	-3.57448	2.12238	1.26933e-219	1.45853e-217		2018-03-01		NUF2	0.43905	5.69824	3.69806	3.16e-61	8.51e-59							NUDT11	0.716964	2.48011	1.79043	0.0243025	0.0319469	AFF3	13.1419	1.28536	-3.35392	5.49e-38	6.62e-36
SCN2B	MTFR2	AGAP1-IT1	EBF2	RP11-587P21.2	REPS2		P4HA3	2.46824	3.30463	1.09533e-70	1.85848e-69	2020-03-01	-2.70792	4.78764	9.32751e-219	1.06504e-216		SLC7A10		RUFY4	0.0642693	0.310797	2.27377	3.43e-18	1.02e-17							EGFR	3.25936	16.3036	2.32253	3.87e-27	8.86e-26	GATM	5.23238	2.50255	-1.06407	9.37e-12	3.86e-11
XIRP2	CENPE	RP5-963E22.6	TNMD	ZAR1L	MMP17		CENPI	2.21978	2.66531	3.72023e-70	6.26538e-69	SLC7A10	-4.69273	1.62552	2.59945e-216	2.93125e-214		PDK4		HJURP	0.400148	4.34476	3.44067	1.6e-59	2.07e-57							KRT87P	0.734679	2.38658	1.69976	1.44e-10	5.23e-10	OR51E2	0.230296	0.0997024	-1.20779	1.24e-05	2.57e-05
MYL2	ZIC5	GPR19	ALAS2	SFRP1	CDHR4		SALL4	2.80665	1.0518	1.3125e-69	2.19414e-68	PDK4	-3.57891	6.68129	1.03674e-215	1.15472e-213		PLXNA4		LRRC14B	0.32462	0.706086	1.12109	1.63e-05	2.37e-05							SRD5A1	2.89993	7.9305	1.45139	7.69e-25	1.31e-23	RUNDC1	12.6248	5.86777	-1.10537	3.99e-36	3.43e-34
PTH1R	COL11A2	UBE2SP1	STX11	GRIN2B	FUT8-AS1		STIL	2.10351	4.17376	1.70638e-69	2.83958e-68	PLXNA4	-3.26556	4.23296	2.12572e-215	2.3532e-213		ABCA8		PFDN2	32.5543	74.8988	1.20209	4.9e-38	4.4e-37							AC025580.1	0.704218	1.95262	1.47132	0.00139205	0.00219997	MPP2	2.64837	0.795125	-1.73585	3.52e-20	3.54e-19
CASP12	RAET1K	TMEM145	OXCT1-AS1	NFE4	CTD-2583A14.8		MND1	2.68752	2.01075	1.70797e-69	2.83958e-68	ABCA8	-3.85585	4.16873	2.18944e-215	2.40905e-213		LDB2		HPDL	0.449159	1.68667	1.90888	0.000762396	0.00098674							RDH10	7.55806	27.0064	1.83722	2.06e-24	3.36e-23	GNG13	1.50669	0.319103	-2.23929	9.57e-11	3.54e-10
CES1	RNU1-88P	RP11-57A19.2	CACHD1	PHBP4	CTB-49A3.4		PROC	2.55605	-0.0833624	4.45737e-69	7.33003e-68	LDB2	-2.13234	4.30229	1.20331e-213	1.31603e-211		ALPK3		ADAMDEC1	0.664293	4.3141	2.69917	5.4e-29	2.83e-28							SLC39A2	0.454307	1.31685	1.53536	1.61e-05	3.3e-05	DACH1	8.07683	0.642421	-3.6522	1.97e-40	4.09e-38
HHATL	CTD-2319I12.5	GBX2	PQLC2L	RP5-884M6.1	PLAC9P1		CDCA2	2.93796	3.29699	1.21212e-68	1.98075e-67	ALPK3	-2.52984	3.69448	4.87995e-213	5.30512e-211		TNNT3		FANCA	0.373785	1.32245	1.82293	3.98e-39	3.89e-38							IL2RA	0.973026	3.63416	1.90107	3.31e-18	2.66e-17	ANKRD30B	2.52203	0.076116	-5.05024	9.47e-39	1.36e-36
HBA1	RP11-110H1.8	LHX2	FAM13C	CLEC7A	KIF12		RAD51AP1	2.28588	3.65374	1.31375e-68	2.14489e-67	TNNT3	-5.21909	3.42512	8.27421e-213	8.94157e-211		KLF15		AC046185.3	0.564583	1.25302	1.15015	5.45e-16	1.43e-15							PDE7A	6.05677	14.3319	1.24261	4.37e-36	3.71e-34	AL032819.2	1.54224	0.177284	-3.12089	3.97e-28	1.04e-26
AQP7	NKX2-3	NKX3-2	COX7A1	ORC1	CYP4F23P		RAB26	3.10306	3.3546	1.50942e-68	2.45992e-67	KLF15	-3.35524	2.03125	4.20577e-211	4.5181e-209		SLC17A7		CD7	1.062	2.24844	1.08214	0.00332213	0.00408355							IQGAP3	5.41443	12.0585	1.15517	1.39e-17	1.05e-16	RN7SL767P	1.11677	0.262004	-2.09167	9.82e-16	6.18e-15
ADIPOQ	RAET1L	CCR8	AKR1C1	ADAMTS3	APOF		RNFT2	2.12012	2.80821	1.12469e-67	1.79901e-66	SLC17A7	-2.9703	0.477786	1.13738e-210	1.21466e-208		GHR		BOP1	6.47753	18.3444	1.50183	4.56e-35	3.39e-34							PAX6	0.198704	0.555651	1.48356	0.0101117	0.0141069	AC010307.4	0.433151	0.0180475	-4.585	2.98e-36	2.62e-34
	AC092484.1	DPEP1	RP5-839B4.8	TMOD1	TNRC18P1		FBXO43	2.40203	0.30524	1.14355e-67	1.82757e-66	GHR	-3.10984	5.02657	1.44356e-210	1.53262e-208		GPIHBP1		CLDN9	0.137622	0.909543	2.72443	2.86e-21	9.95e-21							IGHV1OR15-9	0.919466	2.52732	1.45874	6.79e-05	0.000128428	AC124312.3	0.449474	0.156385	-1.52313	3.95e-09	1.22e-08
	IGSF23	RP11-738B7.1	ITPRIPL1	CDC20	CTC-1337H24.4		CCDC78	3.5106	2.92957	2.6141e-67	4.15577e-66	GPIHBP1	-3.49272	2.80839	2.34382e-210	2.47395e-208		ACSL1		GTSE1	0.411145	3.23606	2.97652	1.32e-56	7.69e-55							SPEG	0.796406	2.10526	1.40242	7.32e-15	4.17e-14	ITPKA	0.849403	0.350234	-1.27813	1.9e-08	5.42e-08
	KCNK9	OACYLP	LINC02082	RP11-13K12.1	HOXB-AS1		CST1	6.91351	3.65077	4.94204e-67	7.82239e-66	ACSL1	-2.76773	7.48809	3.41841e-209	3.58735e-207		AMPD1		KIF14	0.173627	1.87629	3.43382	3.09e-55	1.43e-53							PRSS12	0.425607	3.46049	3.02338	1.47e-13	7.31e-13	SLC19A2	20.0575	7.76055	-1.36991	1.4e-26	2.96e-25
	MEX3A	LINC00514	CDKN1C	RP5-858L17.1	TFF1		ADAM8	2.29065	4.5373	1.10776e-66	1.74426e-65	AMPD1	-4.50097	0.772841	4.04537e-209	4.2209e-207		BHMT2		LAMP3	1.13	4.22765	1.90354	5.55e-10	1.05e-09							PRSS27	0.63073	2.19264	1.79757	1.59e-17	1.2e-16	SRRM2-AS1	0.527437	0.24647	-1.09759	3.1e-23	4.4e-22
	RP11-440G9.1	HOXC13	GPRASP1	KCNK5	SNTN		HIST1H3H	4.30314	3.51088	1.2244e-66	1.92459e-65	BHMT2	-3.11722	2.67553	1.85308e-208	1.92244e-206		GALNT15		SKA3	0.461582	3.64204	2.98009	1.93e-57	1.34e-55							SOX6	0.133181	0.682486	2.35741	1.62e-22	2.1e-21	AC019117.1	0.40214	0.157947	-1.34826	0.000157067	0.000282833
	RP11-182I10.1	RP11-92K15.3	CTC-297N7.9	RHBDL2	SHROOM1		RHPN1	2.29367	5.56864	2.54687e-66	3.97921e-65	GALNT15	-3.19528	4.30402	6.19181e-208	6.38707e-206		FABP4		SCUBE3	0.454741	3.3735	2.89113	1.02e-18	3.11e-18							AC124248.1	0.361024	1.48714	2.04237	4.74e-25	8.29e-24	ADAMTS19	0.49808	0.154129	-1.69224	5.42e-12	2.29e-11
	LINC02167	RP11-98G7.1	STAB2	CDCA7	TUBA3D		MFAP2	2.34847	5.44202	4.75379e-66	7.35764e-65	FABP4	-4.88161	7.7159	7.65789e-208	7.85475e-206		CIDEC		AL022316.1	0.184286	0.970262	2.39643	9.85e-26	4.3e-25							AC013565.1	0.143043	0.597551	2.06262	0.0111404	0.0154434	C2orf50	0.77544	0.187024	-2.05179	2.89e-11	1.13e-10
	CCNB2	JAKMIP1	FAM149A	SLC6A15	FAAH		SQLE	2.31542	6.71641	5.33875e-66	8.25596e-65	CIDEC	-5.26587	5.20544	1.63142e-207	1.66396e-205		MCAM		DLL3	0.0439548	0.267049	2.60301	0.000155425	0.000211084							AMER1	1.14775	2.83288	1.30346	3.12e-32	1.51e-30	KCNC1	0.235956	0.0192581	-3.61498	9.26e-07	2.19e-06
	KRT6C	HIST1H1PS1	HID1-AS1	BOK-AS1	MAG		OR2B6	4.47055	-0.704337	6.2817e-66	9.68941e-65	MCAM	-2.14259	7.23569	2.38874e-207	2.42277e-205		MYOM3		SH2D2A	0.628266	1.94006	1.62666	5.96e-18	1.75e-17							ANXA3	4.66576	9.4605	1.0198	3.6e-14	1.91e-13	AC125603.3	0.250608	0.0742583	-1.75481	5.55e-13	2.6e-12
	RP11-276H19.4	CAMP	CETP	SPIB	ZBTB42		EPYC	5.99012	2.00436	7.04212e-66	1.08531e-64	MYOM3	-3.13763	1.5171	1.75396e-206	1.76907e-204		SEMA3G		GBP5	0.68001	4.02543	2.56552	7.08e-20	2.29e-19							AC022784.1	0.469661	7.65263	4.02626	7.22e-40	1.29e-37	AC010300.1	0.366835	0.130909	-1.48657	8.61e-18	6.67e-17
	PDX1	RP11-265N7.1	HLF	PAK3	GFRA1		AUNIP	2.22631	2.12172	7.35847e-66	1.13214e-64	SEMA3G	-2.80632	5.28476	3.45115e-206	3.46163e-204		CA4		PIMREG	0.369924	2.85625	2.94882	6.83e-53	2.26e-51							CNIH2	2.17512	4.77756	1.13518	4.2e-08	1.16e-07	MCCD1	0.847028	0.0487377	-4.1193	2.5e-16	1.67e-15
	LL22NC03-63E9.3	C5orf66-AS1	PRRG3	C2orf88	BMPR1B		ORC6	2.55098	2.98923	7.46697e-66	1.14786e-64	CA4	-5.26494	1.48387	5.71795e-206	5.70381e-204		LMOD1		AC073195.1	0.245602	0.562714	1.19608	3.06e-21	1.06e-20							PAX5	0.286132	0.860257	1.58809	2.15e-08	6.08e-08	CSAD	8.47315	3.342	-1.34219	1.39e-22	1.82e-21
	TBC1D21	AC012462.2	TSHZ2	AFAP1-AS1	C8orf86		GRM8	2.92721	-0.192969	1.14008e-65	1.74227e-64	LMOD1	-2.64965	5.20465	7.11605e-203	7.05967e-201		DEFB132		RAD51AP1	1.14425	5.27571	2.20497	4.83e-50	1.17e-48							KIF1A	0.873545	4.85513	2.47456	8.45e-14	4.33e-13	AC093663.2	0.270277	0.0683372	-1.9837	7.11e-11	2.67e-10
	MYT1L	TMEM92	FAM162B	LINC01819	CCDC154		PITX1	3.83181	5.05653	1.33174e-65	2.02834e-64	DEFB132	-4.88441	1.07835	2.58484e-202	2.55042e-200		EBF3		MELK	0.617395	7.40364	3.58397	6e-59	6.41e-57							TRIM29	3.91428	14.911	1.92956	1.57e-24	2.58e-23	CPEB2	7.42233	2.45789	-1.59445	7.23e-35	5.16e-33
	RP11-396O20.2	AC017002.1	SYNM	CDC7	CXADRP3		CCNE2	2.43078	3.13608	1.33469e-65	2.03113e-64	EBF3	-2.71433	2.73306	3.85595e-202	3.78404e-200		GYS2		HLA-DPA3	0.190888	0.51783	1.43975	4.63e-08	7.9e-08							BUB1	3.92639	9.29811	1.24373	4.9e-23	6.76e-22	RHOB	239.549	79.4461	-1.59227	1.33e-41	3.65e-39
	CEP55	SMKR1	TCEAL7	MCM10	PTPRN2		HIST1H2BD	2.6864	5.42061	3.85933e-65	5.82912e-64	GYS2	-4.7925	-1.168	7.22559e-202	7.05272e-200		ABCA10		CBX2	0.755088	4.84669	2.68228	7.39e-25	3.09e-24							CLPSL1	3.19523	7.10242	1.15239	9.86e-06	2.07e-05	RET	11.7787	1.32397	-3.15325	2.68e-31	1.09e-29
	AC114803.3	MRPL40P1	ESR2	RLBP1	ATP1A4		CDC6	2.99701	4.90688	4.03382e-65	6.07752e-64	ABCA10	-3.35229	2.01313	5.00488e-201	4.85902e-199		GNG11		SLC35F2	2.71017	5.70594	1.07408	1.31e-17	3.75e-17							FAM107A	1.19326	6.25236	2.3895	2.78e-11	1.09e-10	PDZK1	10.0855	1.05326	-3.25936	3.2e-19	2.88e-18
	AC006262.10	HIST1H2BJ	EGR1	FAM72B	SLC44A4		GRM4	5.37995	3.13335	1.64132e-64	2.4325e-63	GNG11	-2.16126	5.04698	1.12811e-198	1.0894e-196		TMEM132C		AC114956.2	0.168142	0.505707	1.58862	0.00853311	0.0101433							IGLV3-29	0.236753	0.518091	1.12982	0.0233346	0.0307568	HOXB3	5.30004	1.66953	-1.66656	7.78e-16	4.94e-15
	KRT38	CBX2	CTD-2033D24.2	RP4-697P8.3	SYT17		METTL11B	5.13511	-2.06564	1.83202e-64	2.7107e-63	TMEM132C	-4.68189	2.87474	1.34124e-198	1.28837e-196		MYL2		UMODL1	0.0368902	0.249541	2.75797	6.27e-23	2.37e-22							CYP27C1	0.125191	1.1158	3.15588	4.11e-19	3.65e-18	RNU6-813P	6.85624	0.0232575	-8.20357	4.24e-37	4.43e-35
	KIRREL2	LRRC46	CARMN	AMTN	TSPAN13		CDT1	2.48605	4.12124	1.88351e-64	2.78236e-63	MYL2	-8.00713	4.15913	1.5732e-197	1.50323e-195		ATOH8		IL4I1	0.746581	4.75912	2.67232	3.07e-42	3.71e-41							IGHV3-23	131.849	311.686	1.24121	7.44e-06	1.58e-05	ABAT	8.50622	1.27183	-2.74161	7.41e-40	1.31e-37
	IGHGP	HOXC11	MSS51	RAD54L	PCAT29		CRYBG2	3.23422	1.67943	1.89575e-64	2.79816e-63	ATOH8	-3.26881	2.2666	2.72466e-195	2.58985e-193		KCNA7		PLA2G2D	0.920235	2.40244	1.38442	0.000469969	0.000616724							LINC01238	0.180592	0.366939	1.0228	1.26e-12	5.69e-12	RAPGEF3	1.50244	0.724346	-1.05255	7.99e-19	6.89e-18
	PROKR2	CAPS	FAM89A	CDC25A	U73166.2		SCT	3.74104	-0.580367	4.59423e-64	6.73733e-63	KCNA7	-4.60828	-2.03546	5.42427e-195	5.12904e-193		LGALS12		MIR4653	0.676967	4.07863	2.59093	1.09e-39	1.1e-38							AADAT	1.2227	5.00471	2.03322	5.54e-27	1.24e-25	STMN1P1	0.639688	0.197959	-1.69217	2.11e-27	5.04e-26
	COL6A5	CTA-384D8.35	RP11-51B23.3	AP000593.5	DNAAF3		F12	2.87769	3.18132	5.0221e-64	7.35886e-63	LGALS12	-4.48337	3.07193	7.59975e-194	7.14888e-192		CAPN3		ACAN	0.0807893	1.0901	3.75415	1.23e-40	1.33e-39							IGHV2-5	11.2396	26.5962	1.24263	0.0112358	0.015568	PHYHD1	9.56745	3.37371	-1.5038	5.04e-18	3.99e-17
	RP4-655C5.4	MUC1	TMEM100	BBOX1	C9orf106		HES6	2.88931	3.22392	6.52901e-64	9.5592e-63	CAPN3	-2.98632	0.313363	7.61859e-193	7.12967e-191		TMEM220		EZH2	1.34508	6.3165	2.23143	1.64e-56	9.34e-55							LINC02362	0.236818	0.503611	1.08853	2.75e-09	8.65e-09	GIPR	0.763333	0.192583	-1.98683	2.98e-24	4.75e-23
	RP11-269F21.3	LRRC73	TMEM255A	DMD	PRRT3		MMP1	6.51283	5.10054	1.53183e-63	2.22662e-62	TMEM220	-2.22995	2.18633	2.79005e-192	2.59761e-190		ATP1A2		SNX22	0.657917	1.54431	1.23098	1.39e-10	2.73e-10							MRGPRX3	0.189291	0.571554	1.59428	0.000427675	0.000726744	FAM135B	0.283445	0.0399659	-2.82623	1.53e-17	1.15e-16
	CDC45	HIST1H4D	KIT	POU3F3	ZNF467		E2F2	2.58777	3.43678	2.81579e-63	4.06041e-62	ATP1A2	-4.45008	3.9126	6.46101e-192	5.98468e-190		LRRC39		ELFN1-AS1	0.0494964	0.847485	4.09779	1.41e-05	2.06e-05							PCSK9	0.279833	0.834711	1.57671	5.26e-05	0.000100865	AL158206.1	5.70939	1.97611	-1.53067	4.46e-36	3.77e-34
	HPDL	C19orf45	CCDC141	C21orf91-OT1	WNK4		FAM72A	2.43593	0.558102	5.24381e-63	7.53176e-62	LRRC39	-2.61497	0.548354	1.78759e-191	1.64739e-189		MYMX		EIF4EBP1	20.7201	54.0168	1.38238	1.95e-18	5.84e-18							PRF1	2.11168	5.19201	1.2979	3.45e-11	1.34e-10	AC107926.1	0.2272	0.0829948	-1.45287	3.08e-08	8.59e-08
	DEPDC1-AS1	RP1-34B20.4	TMEM252	INTS6L	BAIAP3		TDO2	3.77493	2.30318	2.31975e-62	3.29538e-61	MYMX	-3.40292	-0.262928	2.26869e-190	2.0802e-188		ADRB2		UBE2C	1.91838	32.7892	4.09526	1.03e-60	2.37e-58							AL031058.1	2.29013	4.74988	1.05246	3.07e-16	2.03e-15	LINC01948	0.946231	0.383846	-1.30166	6.93e-13	3.21e-12
	S100A2	IGFL2	APOLD1	NOTUM	SERPINA11		KREMEN2	3.9472	1.81779	3.26237e-62	4.6236e-61	ADRB2	-2.80094	2.11842	8.17289e-190	7.45622e-188		TGFBR2		ZNF695	0.0825881	0.724777	3.13353	1.23e-43	1.65e-42							CCL13	1.37245	4.17203	1.60399	1.23e-14	6.88e-14	ZNF483	0.301724	0.149725	-1.01092	3.38e-10	1.18e-09
	LINC01833	MYT1	SLC29A4	OTX1	ZNF725P		GINS2	2.13394	4.37569	3.66434e-62	5.18924e-61	TGFBR2	-2.19772	7.17256	1.80422e-189	1.63778e-187		GNAI1		MMP1	0.217107	17.315	6.31747	4.98e-50	1.21e-48							EXO1	3.12618	7.03483	1.17011	2.5e-21	2.86e-20	AL121790.2	1.20724	0.458875	-1.39554	2.77e-15	1.66e-14
	IGHG1	CTB-49A3.4	RYR1	AC092484.1	CTD-2033D15.3		LAMP5	2.94306	3.90085	1.01419e-61	1.42182e-60	GNAI1	-2.45999	4.30267	1.18068e-188	1.06643e-186		CAV3		LINC01215	0.116794	0.268263	1.19968	0.0170778	0.0198013							PLEKHG4B	1.22313	3.50128	1.5173	1.42e-19	1.33e-18	TGM3	0.522264	0.13701	-1.9305	3.54e-12	1.52e-11
	RP11-318G21.4	LYPD1	INMT	PRKCA	TPSP2		HIST1H2AM	4.07977	-0.426237	2.04362e-61	2.85181e-60	CAV3	-4.94852	-1.73916	4.50333e-188	4.04743e-186		ADH1B		Z84484.1	0.148753	0.337755	1.18306	2.67e-06	4.08e-06							AC007098.1	0.209798	0.671802	1.67903	2.42e-20	2.49e-19	CCDC154	0.895822	0.388596	-1.20494	4.32e-10	1.49e-09
	SEMG2	ENTHD1	TRPM3	CTD-2527I21.15	LGALS8-AS1		SDS	2.30402	3.57954	3.28289e-61	4.55316e-60	ADH1B	-5.10122	7.37167	1.36434e-187	1.22018e-185		CNN1		ABRACL	14.9431	36.8702	1.30298	8.6e-33	5.62e-32							ERICH5	0.292758	1.31059	2.16244	1.83e-27	4.42e-26	OGN	9.68345	2.20601	-2.13409	4.85e-18	3.84e-17
	RAX	SYT13	RHOXF1-AS1	MID1	RAPGEF3		TMEM270	4.22588	-1.06342	3.71785e-61	5.15248e-60	CNN1	-3.14925	5.27484	2.10339e-186	1.87192e-184		SPRY2		LIMD2	1.53931	4.71184	1.61401	1.76e-26	8.05e-26							IGHV1-18	102.512	285.649	1.47845	6.69e-06	1.43e-05	HDC	3.69868	0.223996	-4.04546	9.16e-18	7.07e-17
	TERT	FOXH1	CLDN5	RP11-774D14.1	ATP7B		TYMS	2.0205	4.78636	4.52137e-61	6.25175e-60	SPRY2	-2.42439	4.15672	4.52212e-186	4.00484e-184		DGAT2		CD1A	0.120961	0.919966	2.92704	2.78e-11	5.67e-11							SFT2D2	7.29743	19.7821	1.43874	2.73e-34	1.81e-32	AC004522.1	0.425161	0.0644531	-2.72169	5.71e-24	8.78e-23
	FAM72A	LINGO1	RP11-91K11.2	KIF2C	HDC		RTKN2	2.07154	3.35677	5.83623e-61	8.04531e-60	DGAT2	-3.30773	6.06421	2.73511e-185	2.41048e-183		AKAP12		SOX11	0.268647	2.01337	2.90583	4.45e-08	7.59e-08							ACTL8	0.994371	16.0172	4.00969	2.72e-18	2.2e-17	AC010735.1	0.367664	0.146191	-1.33053	9.8e-12	4.03e-11
	OR7E62P	DNAAF3	CHL1	CTPS1	C5orf49		TUBB3	3.70403	1.94947	1.46165e-60	1.98773e-59	AKAP12	-2.67785	5.73923	2.93587e-185	2.57491e-183		CXorf36		CLPS	0.0914118	0.740785	3.0186	1.15e-19	3.69e-19							AC069148.1	0.233712	0.930111	1.99267	6.66e-24	1.02e-22	AC079630.1	0.272653	0.128123	-1.08954	0.00165664	0.00259292
	LINC01926	RP11-25L3.3	PDE1C	NLRP7	LRRC73		SYNGR3	3.15701	1.62345	2.03961e-60	2.76131e-59	CXorf36	-2.03979	4.7224	3.51211e-185	3.0655e-183		DST		WFDC21P	0.33865	2.65069	2.9685	5.17e-20	1.68e-19							TTC7A	4.65281	9.73989	1.0658	2.16e-38	2.84e-36	AL391001.1	4.10478	1.54825	-1.40667	2.61e-19	2.37e-18
	RP11-485F13.1	LINC01775	APCDD1	AC005863.1	EEF1A2		DIAPH3	2.29547	3.52981	2.12399e-60	2.87127e-59	DST	-2.38083	8.14384	2.43457e-184	2.11481e-182		NNAT		LINC00518	0.0150772	0.244305	4.01824	0.00271647	0.00336378							CCDC77	2.7122	5.64937	1.05863	2.97e-19	2.68e-18	MUC19	0.332423	0.0354979	-3.22721	2.09e-15	1.27e-14
	BARX1	LINC01344	DUPD1	SKA1	CTD-2410N18.3		CHRNA6	4.33748	0.265746	4.56292e-60	6.10913e-59	NNAT	-3.55496	1.93044	3.4913e-184	3.00401e-182		CPED1		AL136162.1	0.262737	0.531553	1.01659	1.11e-11	2.3e-11							MATK	0.994965	2.06892	1.05616	1.84e-06	4.19e-06	CCDC114	0.538427	0.262772	-1.03494	3.1e-09	9.67e-09
	C4orf51	LA16c-380H5.2	CD209	LRRC34	GALNT6		FAM72D	2.94423	-0.48565	8.99127e-60	1.19675e-58	CPED1	-2.86278	4.28024	4.85737e-184	4.15969e-182		FLNC		MEX3A	2.33602	8.88977	1.92809	5.03e-23	1.91e-22							RCOR2	1.42372	6.95472	2.28833	2.21e-26	4.55e-25	AC107890.1	0.66846	0.020918	-4.99802	0.00257011	0.00391456
	RP11-57A19.2	FAM57B	WASF3	RP11-535A19.1	POLD4		TFR2	3.27116	1.91798	9.65879e-60	1.28176e-58	FLNC	-3.08168	4.60194	5.77012e-184	4.91814e-182		CLMP		LINC01842	0.061684	0.605665	3.29555	3.11e-17	8.76e-17							TMEM38A	2.26115	5.72654	1.34061	1.55e-26	3.25e-25	AC139149.1	0.575087	0.281489	-1.0307	7.48e-13	3.45e-12
	REG1A	CRABP2	SLC36A2	CHST6	AC068137.13		CEMIP	3.17311	4.44109	2.47847e-59	3.2559e-58	CLMP	-2.38988	5.50674	3.43358e-183	2.89938e-181		ECM2		SBSN	0.135495	3.02134	4.47887	7.7e-05	0.000106796							MAST1	0.227376	0.629911	1.47007	3.5e-12	1.51e-11	HCN2	0.547277	0.257461	-1.08792	0.000530499	0.000889789
	C1orf105	OASL	CFD	RP11-44K6.4	MICALCL		ORC1	2.28633	2.7757	2.94204e-59	3.85651e-58	ECM2	-2.58623	5.09694	1.03939e-182	8.73615e-181		PLAC9		LINC00460	0.0559872	0.366889	2.71218	1.41e-27	6.84e-27							GGH	9.16696	20.3096	1.14765	2.62e-21	2.99e-20	AC018695.6	0.652861	0.27534	-1.24556	8.61e-17	6.03e-16
	FAM163B	HIST1H3B	HOXA4	ABRACL	RP11-710F7.2		SAPCD2	2.26196	4.47011	3.81595e-59	4.98048e-58	PLAC9	-3.07532	3.10645	1.28009e-182	1.07097e-180		HHATL		MND1	0.465757	2.82446	2.60033	5.76e-48	1.13e-46							KANK4	1.69219	7.52108	2.15205	3.76e-05	7.34e-05	AC106782.2	6.20298	2.29891	-1.43201	1.99e-31	8.33e-30
	RP11-69L16.6	CDKN2A	MATN2	LINC02181	NECAB3		CFAP45	2.69669	2.61494	6.05145e-59	7.86429e-58	HHATL	-5.1485	-0.629077	3.64033e-182	3.03166e-180		CASQ2		CALHM6	2.82473	6.1032	1.11146	2.42e-07	3.95e-07							ANKRD35	0.896553	3.07426	1.77778	1.21e-09	3.96e-09	GDF9	3.10094	0.257719	-3.58884	9.24e-14	4.71e-13
	FDCSP	KISS1R	TWIST2	CCNE1	RP11-423H2.3		ZNF695	3.22142	1.33601	1.19e-58	1.53987e-57	CASQ2	-3.39509	1.79911	2.20677e-181	1.82941e-179		CES1		MT1H	0.104902	0.845262	3.01035	8.42e-09	1.49e-08							HLA-DOB	1.7152	5.78131	1.75302	1.42e-28	3.93e-27	ADAMTS19-AS1	0.326801	0.0881246	-1.89079	2.28e-12	9.97e-12
	DLGAP5	ETV7	MYADML2	ANLN	KRT18P25		AJM1	2.05679	2.47306	1.30708e-58	1.68418e-57	CES1	-3.75523	4.70185	3.13251e-181	2.58503e-179		SGK2		MTFR2	0.259164	1.78311	2.78246	7.36e-57	4.51e-55							RHCG	1.00938	8.55449	3.08322	1.81e-29	5.6e-28	MCCC2	43.341	16.266	-1.41387	2.72e-38	3.43e-36
	ISX	HIST1H2BF	RP11-6O2.4	RP11-263K4.5	CFL1P5		TMEM132A	2.18911	6.70975	1.35738e-58	1.74774e-57	SGK2	-3.13765	1.40443	2.04194e-179	1.67744e-177		LMOD2		ORM2	0.253076	5.75164	4.50633	1.67e-06	2.59e-06							PRAME	6.06824	12.6462	1.05935	9.83e-17	6.85e-16	SLC38A11	0.308767	0.100987	-1.61235	2.81e-14	1.51e-13
	RAD51AP1	MAPK15	KCNMB1	RP11-576D8.4	FUCA1P1		BRIP1	2.18771	3.59483	6.89706e-58	8.72586e-57	LMOD2	-6.79452	1.88712	3.96209e-179	3.24017e-177		MME		QPCT	2.61621	6.08421	1.21759	5.51e-10	1.05e-09							AL592293.1	0.199028	0.401711	1.01318	1.5e-05	3.08e-05	IMPDH1P5	0.368464	0.157309	-1.22792	3.01e-13	1.45e-12
	E2F2	LRFN2	RXRG	PLAGL1	RP11-428L9.2		ADM2	2.19843	3.96654	1.00749e-57	1.27108e-56	MME	-3.26812	5.82509	4.51524e-179	3.67597e-177		LIFR		SPIB	0.307852	1.70924	2.47305	5.95e-05	8.34e-05							NEURL3	0.556194	1.42526	1.35757	4.84e-13	2.28e-12	EEF1A2	59.594	11.8251	-2.33332	1.22e-24	2.03e-23
	FABP6	LINC00634	RP11-467I17.1	RP11-894P9.2	TPRN		OLR1	2.21951	4.37043	1.26451e-57	1.58874e-56	LIFR	-2.53842	5.73999	1.20207e-178	9.74269e-177		PDZD2		TLX1	0.0116908	0.638084	5.77029	4.62e-19	1.43e-18							IGKV1-16	26.115	67.1082	1.36161	0.000638456	0.00105884	SRMS	4.57219	1.79313	-1.3504	5.81e-24	8.93e-23
	RP11-3J1.1	NPW	RYR3	TMSB15B	RP11-416N2.3		HIST1H2AI	4.74012	1.06363	1.44475e-57	1.80893e-56	PDZD2	-2.60433	5.2108	4.35344e-178	3.51274e-176		HFE2		TNFSF13B	2.46137	5.13717	1.06151	6.74e-12	1.42e-11							DAPK1	2.59159	5.82176	1.16762	3.65e-18	2.92e-17	DNAAF1	0.719996	0.148919	-2.27346	1.53e-33	8.8e-32
	CXCL10	HIST1H4K	AC073850.6	RP11-299L17.3	RP11-557C9.3		MATN3	2.84395	4.73848	5.69242e-57	7.0065e-56	HFE2	-6.32319	-0.658415	9.42306e-178	7.56972e-176		LHFPL6		RASGRF1	0.182806	0.441526	1.27219	0.0238399	0.0273029							CYP39A1	0.834927	2.95388	1.82289	1.48e-22	1.93e-21	CCDC74B	2.10897	0.396638	-2.41065	5.26e-26	1.04e-24
	RPL37P18	LA16c-312E8.4	DNASE1L3	FER1L6-AS2	RET		HCN2	3.68936	0.865614	7.7313e-57	9.48391e-56	LHFPL6	-2.03085	5.56898	1.56124e-177	1.24865e-175		DMD		CDT1	1.06988	5.48458	2.35794	4.31e-45	6.41e-44							TNIP3	0.153053	0.486213	1.66756	3.3e-17	2.41e-16	TMEM25	11.3053	4.8959	-1.20735	1.24e-29	3.93e-28
	IL36RN	KCNJ10	RP11-61I13.3	RP11-432I13.5	C15orf59		ARTN	3.20907	2.242	1.68298e-56	2.04652e-55	DMD	-2.98754	4.83421	1.72858e-177	1.37642e-175		KLF4		AL356417.2	0.189264	0.987067	2.38275	8.52e-28	4.19e-27							SAA4	0.25194	1.26008	2.32236	1.52e-16	1.04e-15	AL021392.1	0.868475	0.419084	-1.05124	3.57e-12	1.54e-11
	KIF1A	HIST1H4H	ERICH4	SLC7A5	UGCG		CST2	5.24061	1.90725	2.04647e-56	2.48187e-55	KLF4	-2.53558	5.44876	3.67346e-177	2.9123e-175		MLXIPL		TICRR	0.319821	1.27061	1.99018	1.09e-35	8.43e-35							NMU	1.06683	5.04412	2.24128	1.34e-15	8.3e-15	SLC6A4	3.13079	0.133293	-4.55385	5.42e-16	3.5e-15
	MKI67	AMZ1	HNRNPA1P66	FIGN	SRRM2-AS1		HIST1H2BO	4.56101	-0.516464	3.83833e-56	4.61795e-55	MLXIPL	-3.48608	2.54726	1.84621e-176	1.451e-174		ADIPOQ		AC027228.2	0.137364	0.371094	1.43378	1.57e-05	2.28e-05							PRKCQ-AS1	0.237962	1.20663	2.34218	1e-22	1.33e-21	CFD	31.8949	11.1899	-1.51113	1.15e-10	4.22e-10
	CLSPN	MYBL1	LMO7DN	OR7E110P	CACNA1D		IL4I1	2.70175	3.48723	5.82603e-56	6.96782e-55	ADIPOQ	-5.18264	6.94392	2.12703e-176	1.66449e-174		TRIM63		OR7E38P	2.21817	4.56292	1.04059	3.17e-08	5.45e-08							AL138767.3	0.229581	0.580002	1.33705	1.05e-06	2.46e-06	SYNDIG1	3.13756	1.45223	-1.11138	1.92e-10	6.87e-10
	ZNF560	RDH16	RNU5B-3P	ZNF695	TTLL9		FOXP3	2.146	2.60081	1.28128e-55	1.52236e-54	TRIM63	-4.11821	-0.446298	4.02239e-176	3.13419e-174		FAM180B		PTTG1	1.44211	12.5449	3.12084	8.96e-60	1.26e-57							FCRL2	0.169883	0.436735	1.36222	6.58e-06	1.41e-05	LINC00243	0.446279	0.173124	-1.36614	1.41e-16	9.65e-16
	ZNF971P	CAPN9	XPNPEP2	SYNPR	NPAS1		HASPIN	2.02567	1.56753	1.40663e-55	1.6691e-54	FAM180B	-3.96601	-0.751389	1.32406e-175	1.02728e-173		ANGPTL5		CENPA	0.445915	4.15159	3.21882	7.63e-55	3.3e-53							LINC00582	0.217892	0.533224	1.29113	4.9e-08	1.34e-07	RERG-IT1	1.76041	0.279472	-2.65514	1.22e-27	3.04e-26
	RP11-1134I14.2	FOXJ1	PI16	CENPN	SYT9		RIPPLY3	3.15404	1.76743	1.6539e-55	1.95612e-54	ANGPTL5	-4.00871	-1.53654	5.58588e-175	4.2971e-173		TXNIP		TRBV6-1	0.303765	0.641404	1.07828	0.000103361	0.000142058							IVL	0.365664	1.5269	2.06202	2.98e-12	1.29e-11	AL021068.2	2.62433	0.586528	-2.16168	1.67e-21	1.93e-20
	UNC80	NAT1	ZNF300P1	TNFSF13B	RP11-347C12.10		HIST1H2BK	2.11615	5.08665	1.71903e-55	2.03051e-54	TXNIP	-2.03544	9.54641	3.74525e-174	2.85693e-172		MAMDC2		U62317.1	0.483739	3.78195	2.96683	3.87e-31	2.29e-30							PPP1R1A	2.49328	5.67632	1.18691	0.00291786	0.00440907	ELOVL5	110.156	43.4678	-1.34152	1.43e-29	4.49e-28
	CDCA2	HIST1H2AL	RP11-71E19.2	ALK	SMIM22		IL21R	2.6355	2.35293	2.99236e-55	3.52082e-54	MAMDC2	-3.02197	3.32232	2.17896e-173	1.65519e-171		MRAP		AC109322.1	0.649675	1.68397	1.37408	6.64e-22	2.37e-21							LRRC8D	7.54351	15.4348	1.03288	5.76e-24	8.86e-23	CELF3	0.246745	0.036121	-2.77211	2.51e-10	8.88e-10
	SOHLH1	ARMC3	MEF2C-AS1	HNRNPA1P33	SERPINA6		SLC16A3	2.25657	5.52928	3.3932e-55	3.98728e-54	MRAP	-4.45587	0.390943	3.88447e-173	2.93844e-171		CACNA1S		MCM10	0.325	2.8278	3.12117	2.69e-51	7.34e-50							TSPYL5	9.86289	22.5003	1.18986	7.01e-20	6.81e-19	LINC00993	48.8963	2.40787	-4.3439	2e-32	9.96e-31
	TRIML2	PLPPR5	PLN	PPP1R17	PGAP3		TIGD3	2.02586	0.0884992	3.98762e-55	4.67669e-54	CACNA1S	-6.78427	0.930491	9.65896e-173	7.27628e-171		PLSCR4		BCL2A1	1.77125	5.60866	1.66289	4.15e-10	7.94e-10							LEMD1	0.162453	2.14893	3.72553	3.82e-33	2.09e-31	GTF2IP7	1.30374	0.301624	-2.11183	4.53e-37	4.69e-35
	RP11-77A13.1	SCUBE3	AP000892.6	KCTD14	TTC39A		MISP	3.25329	5.39332	1.06627e-54	1.2409e-53	PLSCR4	-2.09483	4.755	1.164e-172	8.73244e-171		DOCK11		LHFPL5	0.0195167	0.260427	3.7381	1.87e-22	6.88e-22							AC126773.2	0.235167	0.71339	1.601	9.72e-28	2.45e-26	WDR17	0.361908	0.176001	-1.04004	0.0028684	0.00433803
	LINC01606	FGD3	CPM	HMGA1	CCDC78		ISG15	3.53733	6.93455	1.32344e-54	1.53429e-53	DOCK11	-2.29922	4.77129	7.40714e-171	5.48884e-169		STARD9		CENPW	4.90853	15.2042	1.63111	2.21e-19	6.98e-19							IL1R2	0.320759	1.26678	1.9816	4.64e-25	8.14e-24	KISS1R	0.97623	0.15743	-2.63251	1.72e-15	1.05e-14
	PMPCAP1	MMP9	EMX2OS	FLJ36000	SLC6A4		PRR11	2.76878	4.44126	1.92197e-54	2.21404e-53	STARD9	-2.13639	3.56445	1.01919e-170	7.52171e-169		ENPP2		CLDN6	0.0536576	1.51916	4.82335	4.91e-13	1.1e-12							IGKV3-11	115.358	285.061	1.30516	4.33e-06	9.48e-06	SIX1	6.79135	3.08531	-1.13828	5.34e-07	1.3e-06
	GCNT3	CAPSL	CREB5	CPNE8	TMEM161BP1		HIST1H3J	4.36092	-1.79311	4.35322e-54	4.97061e-53	ENPP2	-2.71085	5.63105	2.33208e-169	1.70036e-167		IDI2		FCRL3	0.157566	0.465673	1.56336	5.01e-06	7.53e-06							AC025154.2	0.378187	2.33156	2.62412	1.02e-17	7.8e-17	DEFB132	0.326947	0.0492967	-2.72949	1.4e-32	7.08e-31
	EXO1	KB-1440D3.13	SYN2	EZH2	PLEKHF2		CDC25A	2.181	3.10132	6.00926e-54	6.84001e-53	IDI2	-5.22934	-2.95777	5.87247e-169	4.26459e-167		PKHD1L1		LRP8	0.4843	1.46624	1.59815	2.79e-20	9.23e-20							SCML2	0.816574	1.96529	1.26709	1.45e-14	8.02e-14	SSC5D	4.37683	1.94815	-1.16778	9.09e-17	6.35e-16
	GABRA5	NT5DC4	LINC01942	LINC01460	LINC01644		HTR1D	3.61918	0.344931	7.17867e-54	8.15064e-53	PKHD1L1	-3.67218	0.28438	1.61364e-168	1.16252e-166		C14orf180		AC067931.1	0.138506	0.31021	1.16329	1.83e-07	3e-07							FUOM	3.19145	6.941	1.12093	3.03e-20	3.07e-19	TMEM210	0.523034	0.240337	-1.12185	1.11e-16	7.68e-16
	C12orf56	CTD-3035D6.2	C10orf71	ACTG2	TMEM63C		HIST1H4I	2.04075	4.0217	8.42018e-54	9.54234e-53	C14orf180	-5.10065	1.67285	2.9098e-168	2.08804e-166		SRPX		CDCA2	0.377166	2.74724	2.86471	1.18e-50	3.02e-49							SLC15A2	1.23139	2.75443	1.16147	1.12e-19	1.07e-18	AC116036.2	0.853116	0.407891	-1.06456	4.01e-11	1.54e-10
	MAGEA12	RHBG	ADH1C	COL22A1	BAK1P2		CXCL11	3.74179	3.87203	8.61517e-54	9.75723e-53	SRPX	-2.50227	4.58338	4.27106e-168	3.0528e-166		CORO2B		ARHGEF26-AS1	0.171082	0.381231	1.15598	4.85e-06	7.3e-06							PRKCQ	0.642124	1.84263	1.52084	2.5e-14	1.35e-13	VN1R85P	0.410211	0.189877	-1.1113	1.52e-07	3.92e-07
	CARD17	LHFPL5	CSRNP3	RP5-968J1.1	AC092162.1		BCAS4	2.02048	5.02633	1.12549e-53	1.27073e-52	CORO2B	-2.32833	2.34045	1.13471e-167	8.07866e-166		FITM1		AC011479.1	0.577328	1.25073	1.1153	0.0122817	0.014404							LINC02195	0.241005	0.65865	1.45045	8.35e-10	2.78e-09	RALGPS2	10.7036	2.70612	-1.9838	1.18e-40	2.54e-38
	CENPI	SLC44A4	AKAP6	AQP4	MS4A14		E2F8	2.64735	2.72611	1.54666e-53	1.74084e-52	FITM1	-2.98583	-0.673703	6.47021e-167	4.57069e-165		DTX1		MMP12	0.766134	3.86867	2.33617	7.59e-06	1.13e-05							STX19	0.662389	2.65569	2.00334	5.37e-13	2.52e-12	AC131097.1	0.257436	0.0750724	-1.77786	1.38e-12	6.16e-12
	NMU	CBLN2	CAPN11	LPO	TPO		KIFC2	2.09537	4.53412	1.61768e-53	1.81964e-52	DTX1	-2.42642	3.04074	6.81809e-166	4.79777e-164		CIDEA		P2RX5	0.157902	0.411793	1.38289	3.11e-10	5.98e-10							LDHB	42.199	160.697	1.92906	1.74e-33	9.96e-32	ZNF30-AS1	0.234893	0.109091	-1.10648	2.9e-12	1.26e-11
	LINC00634	CTD-2047H16.2	CLDN11	RP11-115C10.1	PDZPH1P		PRR36	2.20727	5.22555	5.43999e-53	6.05908e-52	CIDEA	-4.92525	3.38317	6.88139e-166	4.82361e-164		ANGPTL8		AC245100.3	0.0665562	0.581259	3.12654	5.2e-11	1.04e-10							LINC01301	0.21614	0.470231	1.1214	3.48e-19	3.12e-18	FLJ12825	0.4743	0.161765	-1.5519	3.41e-12	1.47e-11
	AC068580.7	RET	CSRP3	TBR1	AMBP		ITPKA	3.35621	0.578415	6.12409e-53	6.81268e-52	ANGPTL8	-3.86475	-0.822693	1.9995e-165	1.39619e-163		TUSC5		STAP1	0.377089	0.856751	1.18397	5.46e-08	9.28e-08							ZNF503	0.0175983	2.30838	7.0353	4.35e-85	4.28e-81	C16orf89	7.71267	2.35655	-1.71055	5.86e-08	1.58e-07
	SLURP1	FBXL16	PAK3	PTGS2	KRT18		CXCL10	3.6052	5.77417	3.49827e-52	3.82597e-51	TUSC5	-5.04069	5.14636	1.90755e-164	1.32181e-162		F10		CDC25A	0.516896	2.20605	2.09352	2.62e-40	2.78e-39							BYSL	12.0437	25.2824	1.06985	4.49e-23	6.2e-22	LAMA2	4.38701	2.04586	-1.10053	7.52e-15	4.28e-14
	AC012512.1	SNORA73B	ISM1	HORMAD1	CYP4F35P		GPRC5A	2.37688	8.42358	3.53073e-52	3.85915e-51	F10	-2.52723	1.61871	2.06558e-164	1.42588e-162		ANXA1		FAM129C	0.106358	0.272629	1.358	0.00143269	0.00181447							CCL17	1.59811	3.3796	1.08049	2.03e-07	5.17e-07	EDIL3	8.09785	3.53944	-1.19402	8.91e-12	3.68e-11
	GABBR2	ELAVL2	NMRK2	PRR4	OR4K12P		C3orf67	2.10206	2.27457	3.67422e-52	4.01115e-51	ANXA1	-2.33115	7.70715	2.89739e-164	1.9925e-162		LGI4		IDO1	1.4569	6.56301	2.17145	0.00392293	0.00479446							LINC01232	0.401301	0.896447	1.15953	9.3e-17	6.5e-16	PYY	1.24957	0.120433	-3.37513	1.96e-21	2.26e-20
	SP8	SYT5	RP11-255G12.2	CEP55	PHGR1		GNG13	5.43655	0.0595105	4.31421e-52	4.70135e-51	LGI4	-2.36127	2.00953	5.25113e-164	3.59752e-162		SLIT3		TINCR	0.880302	5.04593	2.51905	1.68e-18	5.06e-18							LINC01133	1.05169	6.05442	2.52528	2.36e-17	1.75e-16	RNU6-652P	0.6797	0.322583	-1.07523	6.19e-09	1.87e-08
	SBSN	SLC7A11	HOXA5	AC010890.1	SPDEF		HIST1H3D	3.45381	1.22241	4.51205e-52	4.914e-51	SLIT3	-2.39567	6.20497	6.38708e-164	4.3593e-162		SHE		CARD17	0.0477693	0.374706	2.97161	5.67e-17	1.57e-16							AC089998.4	0.167185	1.17523	2.81343	1.69e-06	3.87e-06	SPDEF	122.334	35.1202	-1.80045	1.37e-31	5.94e-30
	FGF21	RP11-731F5.2	USP44	SLC22A20	SEZ6L		HIST1H2BE	3.69964	-1.24987	7.88557e-52	8.56235e-51	SHE	-2.11732	3.49647	8.64473e-164	5.87809e-162		PRRT4		ZBTB32	0.148578	0.352433	1.24613	3.04e-12	6.51e-12							AC104699.1	0.37107	0.84933	1.19464	1.55e-09	5e-09	C1orf21	13.5705	5.80521	-1.22505	2.45e-21	2.8e-20
	ATP2B3	MIEN1	AC002398.12	RP11-69L16.6	CYP4F30P		S100P	4.79125	5.81939	1.07609e-51	1.16496e-50	PRRT4	-3.58258	0.838908	3.50751e-163	2.37607e-161		FBXO40		IGHGP	5.68051	29.8903	2.39559	1.31e-10	2.59e-10							FTCD	0.105297	0.74963	2.83172	1.83e-19	1.69e-18	SIDT1	6.23935	1.63715	-1.93021	2.13e-35	1.62e-33
	NCAN	BMPR1B	KCNJ2-AS1	CTD-2319I12.5	PLA2G10		C9orf116	2.04303	3.19583	2.22809e-51	2.39639e-50	FBXO40	-5.94269	-0.497802	3.82612e-163	2.58228e-161		COL10A1		C8G	0.257084	0.701472	1.44814	2.05e-13	4.66e-13							MFSD4A	0.709721	2.35269	1.72899	8.04e-14	4.12e-13	PLA2G10	0.655187	0.142767	-2.19824	1.64e-27	3.98e-26
	SCb-64M4.1	UMODL1	RBP7	CNGA1	GREB1L		COX6C	2.80034	9.21082	2.74942e-51	2.94836e-50	XIRP1	-4.43397	2.78058	5.00782e-162	3.34254e-160		MMP11		CSAG1	0.00255948	1.27076	8.95563	3.36e-23	1.29e-22							RGMA	0.79107	4.34291	2.45679	1.96e-36	1.79e-34	GEMIN7-AS1	0.96956	0.464787	-1.06076	3.76e-27	8.61e-26
	AC093627.7	RP11-196G18.3	PDE11A	FOXP4-AS1	AC098592.6		TNFRSF18	2.91967	3.21541	4.59441e-51	4.90079e-50	TYRO3	-2.11984	3.98913	9.367e-162	6.22922e-160		XIRP1		ATG9B	0.185184	0.567158	1.61479	1.29e-22	4.81e-22							GRHL3	0.989436	2.41237	1.28577	5.47e-09	1.67e-08	MPP7	6.21688	2.63209	-1.23998	1.84e-23	2.68e-22
	PRB4	NELL2	ODF3L1	LCTL	AC099684.1		CD80	2.2433	0.474318	5.01186e-51	5.3398e-50	VWF	-2.06116	7.87602	1.51586e-160	1.00074e-158		TYRO3		CXCL11	0.618171	8.69901	3.81477	1.86e-41	2.13e-40							ZNF280B	0.144413	0.550616	1.93084	3.88e-14	2.05e-13	MID1IP1-AS1	1.78506	0.662938	-1.42903	1.12e-18	9.49e-18
	IL21	RP3-395M20.12	IL33	TRPM8	C1QTNF7		SYNDIG1	2.83015	2.91581	1.08797e-50	1.15173e-49	PPP1R1A	-3.84232	4.74378	3.0942e-160	2.03534e-158		VWF		AC021087.3	0.475369	1.4482	1.60715	4.41e-09	7.95e-09							VSTM5	0.191802	1.09439	2.51244	8.83e-27	1.91e-25	RSPH1	3.38967	0.818884	-2.04941	1.03e-34	7.15e-33
	GBP5	AC114730.3	RP5-826L7.1	LINC01158	CPA6		FAM72B	2.35901	0.371435	1.11245e-50	1.17626e-49	MYH11	-3.20804	7.02081	8.14664e-160	5.30116e-158		PPP1R1A		MESP2	0.505577	1.39004	1.45913	0.000218845	0.000294248							TRPV6	1.09933	3.70671	1.75351	1.6e-21	1.86e-20	SLC1A2	1.96573	0.458789	-2.09916	2.72e-18	2.21e-17
	RP11-386B13.4	SPOCD1	GLRA4	TYMS	RP11-523J2.1		CST4	8.3203	2.42785	1.44433e-50	1.52099e-49	DWORF	-7.66216	-0.360387	9.18293e-160	5.95415e-158		MYH11		AL390729.1	0.101441	0.247191	1.28498	0.000782135	0.00101151							BRI3P1	0.20479	0.413256	1.01289	1.73e-10	6.22e-10	IGDCC3	0.864605	0.0568175	-3.92763	1.73e-27	4.19e-26
	RP11-587P21.2	RP11-486A14.1	SAA2-SAA4	GBP5	RP11-757F18.5		TESMIN	2.00018	5.21123	2.52241e-50	2.63792e-49	SCN4B	-2.54099	3.67667	1.1335e-159	7.32337e-158		DWORF		IFNG	0.105208	0.397155	1.91645	0.0205553	0.0236681							AC090970.2	0.235443	0.474806	1.01196	2.4e-11	9.48e-11	ZSWIM5	1.36464	0.467445	-1.54565	6.45e-23	8.77e-22
	PSAPL1	SAMD11	FOS	MBNL1-AS1	RP11-53O19.3		PIF1	2.35445	1.72057	3.06054e-50	3.19701e-49	GNG2	-2.03357	4.52297	2.92175e-159	1.88101e-157		SCN4B		SEMA5B	0.239092	0.485385	1.02156	2.74e-11	5.57e-11							LINC01671	0.294806	3.48415	3.56297	1.13e-21	1.33e-20	DUSP5	27.3236	11.7135	-1.22198	6.71e-24	1.02e-22
	SERPINB3	HIST1H2AJ	ASB15	SERPINB7	ZNF587		CAMK2N2	3.09056	0.0108905	8.04173e-50	8.30004e-49	CPA1	-4.13846	-1.44211	6.57841e-159	4.22018e-157		GNG2		MIR155HG	0.436413	0.948435	1.11985	6.63e-12	1.4e-11							CLDN14	0.217759	0.435799	1.00093	1.49e-07	3.86e-07	MMP17	2.27715	0.967989	-1.23417	2.49e-20	2.56e-19
	MAGEB10	CADPS	RP5-875H18.10	A2ML1	RAB26		HIST1H2BH	3.48967	0.953649	2.4871e-49	2.54099e-48	ANGPTL1	-3.05915	2.5656	9.26808e-159	5.92472e-157		CPA1		FSD1	0.0395841	0.256818	2.69775	2.64e-11	5.39e-11							CASP14	6.06317	23.759	1.97033	0.000729247	0.00120066	RNU6ATAC14P	0.449618	0.0911826	-2.30187	5.78e-17	4.12e-16
	NAA11	CDIPT-AS1	RP11-1070N10.3	NIPAL4	RP11-91H12.1		DQX1	3.88709	1.21907	2.52589e-49	2.57771e-48	PCK1	-4.89096	3.48235	4.43332e-158	2.8241e-156		ANGPTL1		LY6E	75.286	150.682	1.00105	1.86e-07	3.06e-07							MAGEA3	1.55298	7.1278	2.19842	2.15e-05	4.32e-05	MIR8071-1	6.7176	2.88229	-1.22073	0.000419657	0.000713983
	RP11-109M17.2	ADAMDEC1	EGR2	MTRF1LP2	SLC27A2		EPN3	2.2001	5.58353	3.46993e-49	3.5233e-48	CDH20	-3.27244	-1.0573	9.72833e-158	6.15393e-156		PCK1		SLC2A6	0.671694	2.05178	1.611	7.74e-26	3.39e-25							UPK2	0.503097	1.56018	1.6328	2.52e-18	2.05e-17	IQGAP2	9.61137	4.57385	-1.07133	5.48e-18	4.32e-17
	KNOP1P5	RP11-13P5.2	TMC2	RP11-16K12.1	CASC16		MAPK8IP2	2.74727	5.0771	6.39992e-49	6.45145e-48	GIPC2	-2.64117	1.46556	1.47869e-157	9.32138e-156		NEK2		NFE2L3	3.40371	8.08391	1.24794	2.85e-17	8.04e-17							CELF4	0.258628	0.526744	1.02623	1.63e-22	2.11e-21	CLSTN2	17.3556	1.03497	-4.06774	7.87e-42	2.34e-39
	IVL	CSAG1	TGFBR3	OR2S1P	TMC4		KIAA1211	2.68649	2.75425	6.78587e-49	6.83671e-48	SMTNL1	-3.35173	0.233491	1.95161e-156	1.22177e-154		CDH20		MYBL2	1.68307	22.5482	3.74385	3.3e-53	1.14e-51							SLC15A1	0.163351	3.65004	4.48186	1.62e-36	1.51e-34	FAM47E	0.518683	0.131328	-1.98168	4.96e-38	6.03e-36
	AC011298.2	WFDC21P	LINC01589	SKA3	SAG		HAPLN1	5.35225	2.60258	7.04578e-49	7.09463e-48	TBX15	-2.27108	3.22673	2.07465e-156	1.29434e-154		GIPC2		CDC25B	7.16689	15.6946	1.13084	1.78e-19	5.66e-19							AC008736.1	2.54286	5.17388	1.02479	3.66e-12	1.57e-11	AZGP1P1	4.38003	0.925398	-2.2428	3.08e-33	1.7e-31
	ZFP42	CHST6	LINC01985	LAMP3	RP3-468B3.2		CREB3L1	2.30654	6.25695	1.18631e-48	1.18992e-47	YIPF7	-3.74315	-3.05885	8.95485e-156	5.54864e-154		SMTNL1		CDKN2A	0.767331	5.17385	2.75332	9.82e-32	6.02e-31							AC099568.2	0.488325	2.45503	2.32983	9.88e-19	8.42e-18	C3orf18	3.19294	1.34792	-1.24415	6.3e-25	1.09e-23
	LINC01014	C4orf48	RP4-673D20.3	ATP4B	ANKRD30BP1		TNFRSF9	2.69603	1.77792	1.22308e-48	1.22477e-47	JAM2	-2.05418	4.44839	2.31941e-155	1.43228e-153		TBX15		ELAVL2	0.123393	0.72124	2.54723	1.17e-20	3.96e-20							NDC80	3.74657	9.54168	1.34867	7.61e-25	1.3e-23	PRKAA2	2.15595	1.05816	-1.02676	2.94e-05	5.82e-05
	ZNF280A	NPNT	RP5-875H18.4	RP11-535A19.2	KRT223P		HIST2H4A	2.89719	-0.714103	1.83603e-48	1.82647e-47	CABP1	-2.23334	-0.371778	4.37264e-155	2.69102e-153		YIPF7		TRAV2	0.261106	0.618339	1.24376	1.99e-06	3.07e-06							HILS1	0.105921	0.866259	3.03181	0.0188698	0.0252388	ERGIC1	29.1899	13.5961	-1.10228	5.02e-36	4.22e-34
	RP11-57A1.1	CLGN	ADAMTS9-AS1	LINC02006	LINC01411		CYSRT1	2.28606	1.25636	2.50546e-48	2.48154e-47	GOLGA8M	-2.80468	-2.61471	1.68773e-154	1.03516e-152		JAM2		E2F2	0.376474	2.13407	2.50299	5.7e-47	1.01e-45							DIAPH3	1.42751	2.86923	1.00716	9.99e-18	7.68e-17	AC093382.1	0.604299	0.259969	-1.21693	5.4e-20	5.3e-19
	HORMAD1	CLDN9	TRBV26OR9-2	HJURP	VAV3		ILDR2	2.2789	0.917064	8.59214e-48	8.38207e-47	ABCA6	-2.64525	3.29801	1.71669e-154	1.04938e-152		CABP1		CTLA4	0.509904	1.21075	1.2476	8.18e-08	1.38e-07							KRT6A	5.85386	40.1606	2.77832	1.73e-20	1.81e-19	AC083906.3	1.30851	0.204429	-2.67825	9.71e-17	6.77e-16
	PGLYRP3	IL17REL	COL25A1	ACAN	CASP16P		METRN	2.38089	5.78245	9.41787e-48	9.17775e-47	TMEM246	-2.23416	1.78213	2.94473e-154	1.78801e-152		GOLGA8M		CDCA5	0.969893	7.81925	3.01113	1.34e-57	9.55e-56							TMEM105	0.233845	0.561252	1.2631	1.82e-11	7.26e-11	ZNF552	27.5503	5.49472	-2.32595	1.24e-42	4.35e-40
	TEX15	IL19	KCNA2	SLC35F2	CPB1		COL1A1	2.25688	12.7381	1.12473e-47	1.09253e-46	TRHDE	-3.99395	0.182616	5.48128e-154	3.31709e-152		ABCA6		SMC1B	0.116401	0.546428	2.23093	0.000458088	0.000601558							C9orf24	0.195993	0.443121	1.17689	0.000115817	0.000212264	CCDC74A	16.1327	2.79875	-2.52713	2.56e-28	6.9e-27
	AC005863.1	LIPM	RP11-7F17.3	MAP7D3	PP14571		RHBDL1	2.63227	2.19085	1.19218e-47	1.15682e-46	GPLD1	-2.64303	1.01229	5.85266e-154	3.53007e-152		TMEM246		TREX2	0.140672	0.297059	1.07841	3.41e-07	5.51e-07							ST14	35.1891	75.7406	1.10594	3.81e-30	1.31e-28	RNU5B-4P	0.56199	0.269677	-1.05931	1.9e-10	6.8e-10
	VRTN	CEACAM6	ITLN1	SLC26A4-AS1	RP11-324L17.1		C20orf204	2.36132	1.26203	1.47047e-47	1.42457e-46	NAT8L	-3.18321	4.17529	3.13862e-153	1.88058e-151		TRHDE		B4GALNT1	0.329992	0.769313	1.22114	0.000466327	0.000612118							RAET1L	0.25807	1.67493	2.69827	9.93e-29	2.82e-27	MYOZ3	0.436384	0.115593	-1.91654	1.28e-20	1.36e-19
	VCX2	RN7SL2	CNN2P3	MYO1H	SEMA3F		HIST1H2AD	3.58503	0.810442	2.13926e-47	2.05929e-46	SLC35G2	-2.00142	2.0322	2.12848e-152	1.27114e-150		GPLD1		AC023983.2	0.146872	0.351893	1.26058	7.8e-05	0.000108207							BX322639.1	0.40525	0.903805	1.1572	2.28e-14	1.24e-13	AC005062.1	0.27549	0.103838	-1.40766	5.96e-06	1.28e-05
	RP11-493L12.5	CFAP47	AP004782.1	IZUMO2	MISP		TICRR	2.07358	3.32409	2.26316e-47	2.1751e-46	MUSTN1	-3.52458	-2.90781	7.5164e-152	4.47411e-150		NAT8L		LTB	1.69713	7.91256	2.22104	8.66e-15	2.14e-14							PDIA2	0.153112	2.24437	3.87365	6.82e-12	2.85e-11	NUS1P2	0.402131	0.183586	-1.13121	0.00198908	0.00308307
	RP11-43D4.3	KCNH1	SACS-AS1	DEUP1	RP11-638F5.2		NKX3-2	2.98783	0.244871	4.4955e-47	4.28654e-46	ABCC9	-2.32671	4.0622	8.33378e-152	4.94444e-150		SLC35G2		TYMS	3.10043	11.9046	1.94098	3.26e-46	5.38e-45							SIRPG	1.05997	2.21765	1.06501	2.01e-08	5.72e-08	RF00275	0.928249	0.205591	-2.17473	2.91e-31	1.18e-29
	KRT75	RP11-676B18.1	LINC01366	SCHIP1	CATIP		HSH2D	2.66915	4.38115	9.66352e-47	9.15186e-46	ANKRD2	-3.52861	-0.638605	4.03761e-151	2.37226e-149		MUSTN1		VAX2	0.991384	2.08327	1.07133	0.00763309	0.00911488							OLIG1	0.106483	0.983911	3.20791	5.3e-06	1.15e-05	KRT8P3	3.57948	1.74653	-1.03526	8.08e-08	2.15e-07
	LINC00392	ADGRB2	CMA1	MGAT3	HRC		LEF1	2.0244	4.76449	1.12059e-46	1.06015e-45	COL6A6	-3.21991	2.37387	6.23669e-150	3.64074e-148		ABCC9		IGHG3	21.7317	119.007	2.45317	2e-10	3.9e-10							MIR17HG	0.192221	0.434723	1.17733	1.08e-11	4.42e-11	BX324167.1	0.334559	0.111732	-1.58222	6.91e-18	5.39e-17
	MAGEA4	LY6H	SCN11A	CX3CL1	RP11-557C9.1		TMEM145	3.82055	2.1557	1.34711e-46	1.27313e-45	KLHL29	-2.47729	2.81906	7.52834e-150	4.38067e-148		ANKRD2		UNC13D	1.81991	3.71059	1.02778	1.31e-06	2.04e-06							TRPM8	0.0540341	1.01829	4.23614	7.84e-24	1.19e-22	FAM214A	11.0168	3.35918	-1.71352	1.23e-38	1.76e-36
	CDC25A	DMP1	CLDN19	SMC1B	ECM1		LHX2	4.36674	-0.163345	1.99255e-46	1.87726e-45	ALDH1A1	-2.52795	5.14286	7.91055e-149	4.53047e-147		COL6A6		ORC6	0.35972	1.94652	2.43595	2.2e-45	3.35e-44							LINC00960	0.380527	1.11326	1.54872	1.57e-08	4.52e-08	AC104984.4	1.342	0.057971	-4.5329	2.74e-06	6.13e-06
	RAP2CP1	SLC17A9	GPR182	ASNS	GALNT7		2020-03-04	4.77373	0.163003	2.02947e-46	1.91105e-45	PRKAR2B	-2.44768	6.33785	2.85177e-148	1.62811e-146		KLHL29		TMEM171	0.0841361	0.361948	2.10499	4.23e-14	1e-13							FAM72A	0.352131	0.74571	1.0825	1.5e-18	1.25e-17	AP005131.7	1.23674	0.614362	-1.00939	1.23e-11	5.02e-11
	RP11-344P13.6	IGFALS	PPP1R14A	CXCL10	BMPR1B-AS1		DNASE1L2	2.29038	0.635995	2.44212e-46	2.29605e-45	ATP1B4	-5.82758	-2.28569	4.20473e-148	2.393e-146		ALDH1A1		PIF1	0.152454	0.751644	2.30168	5.43e-41	6.04e-40							CLCN4	0.561652	2.85635	2.34642	1.19e-36	1.12e-34	ANKRD30A	13.2562	0.515406	-4.68482	3e-34	1.98e-32
	BARHL2	FGFR3	RP11-467J12.4	RP11-20D14.6	GDF9		GBX2	4.31476	-2.11715	2.4541e-46	2.30612e-45	ALDH2	-2.2569	7.00855	4.52594e-148	2.56777e-146		PRKAR2B		KLRG2	0.95861	3.15722	1.71964	2.18e-08	3.79e-08							IGHV1-24	27.0245	60.4385	1.1612	4.04e-05	7.86e-05	ARHGEF38	2.69187	0.969472	-1.47334	2.48e-19	2.26e-18
	AMER2	TMEM215	RP11-184I16.4	POU4F1	CYP4F62P		CELSR3	2.50291	3.98828	3.12501e-46	2.92145e-45	PDLIM3	-2.43289	5.66758	8.7057e-148	4.92374e-146		ATP1B4		NIPAL4	0.0648683	0.261928	2.01359	2.32e-09	4.26e-09							ACBD7	0.667705	2.23253	1.74139	2.26e-12	9.88e-12	LINC01344	0.233336	0.0761129	-1.6162	1.16e-15	7.24e-15
	RN7SL398P	LARP1P1	RP11-81K2.2	BUB1	KLHDC9		S100A14	2.66676	7.74513	3.5836e-46	3.34328e-45	RBMS3	-2.16345	4.35044	8.87787e-148	5.00552e-146		ALDH2		TPX2	2.05474	23.6475	3.52466	8.24e-61	1.99e-58							CDH4	0.154199	0.588058	1.93116	0.00541206	0.00786035	KRT1	14.4808	0.25543	-5.82507	0.00670873	0.00962703
	SPIB	RP11-320N21.2	CTA-407F11.8	RRAGD	FAR2P3		GPR19	2.33186	0.83826	5.13934e-46	4.77751e-45	MMRN1	-3.3526	3.53482	1.14503e-147	6.4359e-146		PDLIM3		IL32	6.8917	14.8248	1.10508	1.75e-09	3.23e-09							SLC6A14	1.34869	8.44696	2.64687	2.14e-25	3.89e-24	UNC5C	1.52288	0.642507	-1.24502	1.53e-13	7.6e-13
	DMRT1	MS4A15	RP11-32D16.1	DEPDC1	HOXB2		PTK6	2.01835	4.43615	6.48151e-46	6.0006e-45	CEBPA	-2.18043	4.49217	1.20038e-147	6.72618e-146		RBMS3		NXPH4	0.665201	3.19962	2.26604	1.36e-12	2.98e-12							MID1	1.13137	3.47593	1.61932	9.26e-29	2.64e-27	TPRG1	8.12558	0.358585	-4.50208	3.26e-36	2.85e-34
	RP11-1103G16.1	UBE2SP2	AC053503.12	AVPR1B	LCN12		SMIM22	2.51848	5.68785	1.20464e-45	1.10679e-44	KLHL40	-7.11901	-1.06966	2.24361e-147	1.25331e-145		MMRN1		TIGIT	0.316238	1.33734	2.08029	3.93e-19	1.22e-18							IGKV1-8	3.57824	10.0861	1.49504	2.64e-07	6.66e-07	KRT89P	0.237519	0.0679141	-1.80626	6.19e-15	3.55e-14
	TLX3	CXCR2P1	RP11-255P5.3	SEPT3	MRPS30		CCR8	3.20043	-0.322451	1.65861e-45	1.51927e-44	CCL14	-3.30245	1.74172	4.44906e-147	2.47769e-145		CEBPA		AUNIP	0.423859	1.91234	2.17368	5.58e-49	1.21e-47							RHBDL2	1.39072	3.61415	1.37783	2.51e-32	1.23e-30	PCP2	5.30313	1.19119	-2.15443	1.47e-24	2.43e-23
	SEMG1	HOXB9	TMEM178A	ART3	ERBB2		SYNGR4	3.12082	-1.50024	1.76396e-45	1.61415e-44	DES	-4.84364	4.8965	2.86429e-146	1.59025e-144		KLHL40		SLC7A5	5.13044	29.0638	2.50207	7.93e-29	4.12e-28							SIM1	0.219769	0.807792	1.87799	0.0102895	0.0143336	FGF7P1	0.536022	0.0228671	-4.55094	4.95e-17	3.54e-16
	PRDM14	HIST1H3G	ANKRD29	LCT	CYP2T1P		POSTN	2.12937	10.1879	2.91497e-45	2.65403e-44	MB	-3.1304	5.70074	5.02754e-146	2.78277e-144		CCL14		LINC00337	0.0372241	0.251445	2.75593	2.52e-44	3.54e-43							CDC7	3.18883	6.78525	1.08937	1.11e-21	1.31e-20	INPP4B	6.22811	1.26888	-2.29523	4.12e-40	8.11e-38
	RLBP1	CD177	CRYAB	DLX5	RP11-53O19.1		CLPSL2	3.35657	0.615441	3.67452e-45	3.33388e-44	HIF3A	-3.69737	1.40537	8.50211e-146	4.69167e-144		DES		GAPDHP35	0.598296	1.62443	1.441	2.15e-09	3.96e-09							TFDP1	22.9847	49.7	1.11257	3.2e-15	1.9e-14	ZNF587	7.62592	3.01558	-1.33847	2e-30	7.1e-29
	COL22A1	CST6	RP11-508M8.1	LINC01354	SLC25A48		HIST3H2BB	3.15177	1.51484	4.85389e-45	4.39075e-44	FAM196B	-3.81177	0.718999	8.75004e-146	4.81385e-144		MB		CCNA2	1.35425	9.41743	2.79784	4.24e-55	1.9e-53							C1QL2	0.0774262	2.09661	4.75909	2.83e-29	8.55e-28	WDR38	0.298302	0.0933383	-1.67623	0.00342322	0.00512116
	DEPDC1B	BRSK2	RP5-827E24.1	KLHDC7B	ADGRB2		IFI6	2.88857	8.55717	1.00058e-44	8.97506e-44	BMX	-2.69689	0.970887	1.11119e-145	6.09476e-144		HIF3A		KIF2C	0.880261	8.2572	3.22965	2.76e-58	2.3e-56							ZBP1	0.740599	1.54836	1.06397	5.87e-09	1.78e-08	AP003059.2	0.267317	0.109647	-1.28569	0.00083048	0.00135583
	CYCSP6	HHIPL2	CTD-2536I1.2	EXO1	STMN1P1		SRMS	2.36286	2.49302	1.27309e-44	1.13633e-43	LILRB5	-2.76759	2.41501	1.25086e-145	6.84015e-144		FAM196B		TMEM132E	0.0877519	0.364347	2.05381	2.7e-05	3.87e-05							ITGB2-AS1	0.695929	1.42329	1.03222	2.62e-10	9.23e-10	Z97653.2	0.348439	0.143137	-1.28351	6.06e-18	4.76e-17
	RTP3	LINC01842	GRIA4	RP11-443B20.1	PRLH		HOXC13	2.97044	3.52122	2.53827e-44	2.23825e-43	SMYD1	-4.9176	2.10238	3.79399e-145	2.06846e-143		BMX		CLEC7A	1.38325	3.39778	1.29653	4.58e-13	1.03e-12							CXADR	5.13939	10.4279	1.02077	9.99e-13	4.55e-12	AKR7L	0.757906	0.272456	-1.476	6.96e-19	6.04e-18
	PADI3	HIST3H2A	WDR86-AS1	LINC01612	FUT8		DPEP1	2.45822	0.65871	2.53845e-44	2.23825e-43	PEAR1	-2.01589	3.3022	2.23004e-144	1.20495e-142		LILRB5		NOTUM	0.0616692	0.386974	2.64961	2.75e-23	1.06e-22							IGLV2-28	0.705838	1.56694	1.15054	0.0206681	0.0274593	FLT3	1.95085	0.620817	-1.65186	1.09e-07	2.85e-07
	RP11-204E9.1	KCNH1-IT1	WDR86	ZP2	AP000439.3		JAKMIP1	2.78284	0.958541	4.13341e-44	3.62522e-43	MYH7	-7.82362	5.60208	3.03661e-144	1.6359e-142		SMYD1		FAM72D	0.0393514	0.305427	2.95634	1.09e-46	1.88e-45							IFRD1	3.74892	9.53415	1.34663	9.64e-41	2.15e-38	KNDC1	0.694302	0.26076	-1.41284	1.64e-06	3.75e-06
	RP5-912I13.1	RP11-148B18.1	ACADL	RIMS3	RP11-1136G11.8		CCNE1	2.81173	3.15147	5.36404e-44	4.68418e-43	TSLP	-3.2317	-0.147273	3.3104e-144	1.77811e-142		PEAR1		HIST1H2BJ	0.688497	3.99415	2.53637	3e-33	2.02e-32							IL2RG	9.96319	22.0971	1.14918	9.24e-10	3.06e-09	VN1R53P	5.12938	0.124094	-5.36928	4.05e-34	2.62e-32
	ESX1	PNCK	LINC00982	ASPM	IQCD		CAMP	4.33357	0.827784	7.00674e-44	6.08939e-43	CAVIN4	-3.00341	0.0975657	7.13671e-144	3.79962e-142		MYH7		OTX1	0.168366	0.909753	2.43387	9.42e-27	4.37e-26							FAT1	8.59558	18.0659	1.0716	4.97e-16	3.23e-15	LINC01145	0.564424	0.261696	-1.10889	4.01e-08	1.11e-07
	RANBP20P	SIM2	LINC01625	TSGA10IP	MINDY4B		CNTD2	3.04187	3.02573	8.80115e-44	7.61243e-43	FMO2	-3.21524	5.21342	2.82949e-143	1.4933e-141		TSLP		FAM171A2	0.452001	1.11669	1.30482	2.91e-13	6.6e-13							AC012073.1	0.859339	2.30491	1.42341	7.82e-34	4.79e-32	GLDN	0.583942	0.258096	-1.17792	2.41e-12	1.05e-11
	FTHL17	FAM83C-AS1	FAM107A	TPPP2	N4BP3		NKAIN1	3.98655	5.50914	1.03351e-43	8.91792e-43	MASP1	-3.567	0.58217	6.70963e-143	3.52062e-141		CAVIN4		UBE2SP1	0.136779	0.685002	2.32427	1.51e-36	1.23e-35							COL9A3	1.61285	15.0098	3.21822	4.52e-27	1.03e-25	MUC6	6.64563	3.05995	-1.1189	0.000926439	0.00150177
	AFAP1-AS1	HIST1H2BG	KCNB1	KIR2DL4	CHAD		FBN2	3.06653	3.70948	2.99955e-43	2.55666e-42	PID1	-2.46091	3.01853	2.13879e-142	1.11901e-140		FMO2		FUT7	0.0729493	0.309187	2.08351	1.09e-27	5.31e-27							FERMT1	0.553551	3.34436	2.59494	2.72e-26	5.55e-25	WWP1	39.8317	11.6661	-1.77159	3.53e-40	7.14e-38
	SLCO1B3	SLC16A6	JPH2	RP11-276H19.4	GRAMD4P7		SLC7A5	2.60805	7.01983	3.25247e-43	2.77094e-42	DENND2A	-2.16386	2.73082	1.00043e-141	5.18937e-140		MASP1		LINC00511	0.113147	0.758675	2.74528	2.64e-30	1.48e-29							NANOGP1	0.0530161	1.52488	4.84612	4.84e-29	1.42e-27	FGF16	0.244041	0.0779349	-1.64678	4.41e-11	1.69e-10
	KCNJ18	HIST1H1D	RP11-524N5.1	CCNA2	GP2		HIST1H2BC	2.71357	3.05628	3.45448e-43	2.9389e-42	MAOA	-3.26307	5.61248	1.00957e-141	5.22187e-140		PID1		FOXM1	0.978445	10.2176	3.38442	1.23e-57	8.88e-56							PHGDH	10.4338	46.1722	2.14575	4e-33	2.18e-31	TMPRSS6	2.45124	0.166501	-3.87991	8.94e-32	4e-30
	TRPM8	ZG16B	CYP26B1	ANXA1	RP11-503N18.4		STARD10	2.14582	7.91947	3.74003e-43	3.18034e-42	TSPAN7	-2.47934	3.88665	2.67191e-141	1.37808e-139		DENND2A		INA	0.0350282	0.408958	3.54537	0.000167008	0.000226302							NPM3	17.9287	38.6193	1.10705	3.59e-12	1.54e-11	MAGI2	1.39725	0.654666	-1.09376	1.01e-10	3.71e-10
	XAGE5	MSLNL	RP11-643A5.3	TCAM1P	RP11-321G12.1		ANKRD22	2.11601	2.85121	4.24273e-43	3.60107e-42	CXCL2	-3.41192	2.35476	2.78939e-141	1.4346e-139		MAOA		ORM1	0.169567	10.477	5.94924	1.35e-11	2.79e-11							AC093809.1	0.560661	1.84907	1.7216	0.038431	0.0490544	CYP2A6	28.5929	0.540742	-5.72457	6.01e-15	3.46e-14
	RTL1	LINC01224	PAPPA2	SYNM	CITF22-49D8.1		RTBDN	6.26558	1.1368	8.44912e-43	7.14124e-42	MRAS	-2.18689	5.64222	3.27786e-141	1.68106e-139		TSPAN7		CHAC1	0.596564	1.58805	1.4125	1.48e-11	3.05e-11							NFE4	0.241388	9.1284	5.24093	2.77e-09	8.68e-09	ELOVL2	13.2496	1.37807	-3.26522	1.41e-21	1.65e-20
	RP11-1109M24.5	KRT18P55	CTD-2224J9.8	BARHL2	OR4K11P		CBX2	2.71591	4.68251	1.07646e-42	9.06457e-42	ANK2	-2.3323	4.31185	3.60912e-140	1.83027e-138		CXCL2		FAM83D	0.775608	8.41743	3.43998	2.09e-55	9.92e-54							IGHV3-71	1.01566	2.46512	1.27924	4.34e-05	8.41e-05	AL121578.3	0.252333	0.0130709	-4.2709	2.05e-27	4.93e-26
	ARL14	RP5-1092A11.5	HCG23	EPHX3	ANKRD30B		TMEM92	2.59187	0.441849	1.22127e-42	1.02554e-41	SAMD5	-2.98524	3.14494	7.77529e-140	3.93205e-138		MRAS		DEPDC1	0.280855	2.5349	3.17403	1.51e-53	5.47e-52							KHDRBS3	1.20133	3.87827	1.69078	1.79e-23	2.61e-22	SFXN2	5.02993	2.45114	-1.03709	2.76e-18	2.24e-17
	ZDHHC4P1	MAFA-AS1	IL6	RP11-462G2.1	GDF15		HOXC11	3.57953	3.18903	1.80718e-42	1.51195e-41	FAM228A	-2.63147	-1.90146	1.12162e-139	5.65639e-138		ANK2		UBD	2.88492	10.3448	1.8423	0.000477351	0.000626102							VASH2	1.06955	2.18543	1.03092	5.59e-08	1.52e-07	WISP2	6.60868	2.81434	-1.23157	9.87e-09	2.91e-08
	CTB-20D2.1	RP11-288G3.4	RP11-930P14.1	DLGAP5	LINC00940		HIST1H2BJ	2.59369	1.86109	5.63777e-42	4.67156e-41	PREX2	-2.30782	3.70687	6.70603e-139	3.3632e-137		SAMD5		GPR18	0.266193	0.717434	1.43038	1.8e-08	3.14e-08							LYPD1	0.426968	1.72373	2.01334	5.54e-17	3.95e-16	RNU6-564P	0.576161	0.274519	-1.06956	1.97e-09	6.29e-09
	RP11-43D4.2	AC092198.1	HTR2A	FZD7	ASCL1		HIST2H2BE	2.03018	6.35148	7.34401e-42	6.07982e-41	FHL5	-2.61768	1.38223	1.49427e-138	7.47339e-137		FAM228A		ULBP1	0.0694511	0.574421	3.04804	1.92e-27	9.25e-27							IGLC7	9.93834	29.9866	1.59324	0.0018412	0.00286424	DRC3	1.47129	0.457834	-1.68419	2.62e-31	1.07e-29
	C3orf30	KISS1	AC105053.3	ID4	GPR160		MUC1	2.53516	9.15684	1.00456e-41	8.28991e-41	MLIP	-3.61972	-0.137228	3.64634e-138	1.81866e-136		PREX2		CCDC150	0.0944923	0.245988	1.38032	4.38e-23	1.67e-22							LPIN1	2.43865	7.69663	1.65814	4.65e-37	4.74e-35	RN7SKP239	0.720928	0.328713	-1.13303	1.17e-17	8.94e-17
	SLC18A3	CTD-2589M5.4	AC098617.1	TPX2	UCP1		GRIN2D	2.23376	2.2064	1.56791e-41	1.28628e-40	FREM1	-2.92107	2.64028	4.52522e-138	2.25083e-136		FHL5		SERPINB7	0.0784833	0.888412	3.50077	2.47e-08	4.27e-08							GPR156	0.171876	0.872396	2.34362	1.67e-29	5.18e-28	TAC1	0.349454	0.097734	-1.83817	9.56e-16	6.02e-15
	ADAMDEC1	LINC01117	FAM47E-STBD1	LINC01198	LA16c-325D7.2		LRRC46	2.1036	2.56055	3.63454e-41	2.94182e-40	CCDC178	-2.98252	-0.0497366	3.31836e-137	1.64155e-135		MLIP		CARMIL2	0.234414	0.711532	1.60187	3.11e-11	6.32e-11							AL109761.1	0.1926	1.53768	2.99707	2.85e-15	1.7e-14	PLA2G4F	1.25448	0.601709	-1.05995	1.33e-20	1.4e-19
	PLK1	KRT37	RP11-35J10.7	C22orf23	NT5CP2		CAPS	2.18671	5.59141	4.81406e-41	3.87752e-40	GNAL	-2.06536	2.94908	3.74942e-137	1.84975e-135		FREM1		PGLYRP4	0.0181157	0.236949	3.70926	0.000133674	0.000182397							AL592494.3	0.355908	0.870552	1.29043	7.68e-11	2.87e-10	LEP	1.67731	0.616866	-1.44312	0.0279349	0.0364177
	FBN2	TSPAN1	CRB2	DGCR5	PIGQ		TRPA1	6.33701	4.01691	7.71737e-41	6.18855e-40	STX11	-2.13077	2.28629	7.13475e-137	3.51033e-135		CCDC178		CCL7	0.0520736	0.744926	3.83847	2.06e-20	6.85e-20							MYLK4	0.204869	0.488686	1.2542	4.77e-17	3.42e-16	ITPR1	8.12451	2.53286	-1.68151	1.42e-31	6.11e-30
	HTR2C	CYP21A2	HSD11B1	LINC00707	AC144450.1		HIST1H4D	4.31818	-0.574252	1.05385e-40	8.41732e-40	HRC	-2.73499	1.09798	6.47369e-136	3.15094e-134		GNAL		CCNE1	0.539824	3.77418	2.8056	6.05e-41	6.71e-40							SGO1	1.53296	3.10445	1.01801	8.73e-19	7.49e-18	NPC1L1	0.471089	0.14212	-1.72889	1.03e-15	6.44e-15
	SEPT14P12	F7	GSTM5	ENPP6	TSPAN1		ZMYND10	2.53393	3.8759	1.16038e-40	9.25194e-40	SPTB	-2.66217	1.622	7.38531e-136	3.58504e-134		STX11		GPC2	0.223516	0.727586	1.70274	7.64e-10	1.44e-09							ZNF385C	0.667521	1.77868	1.41392	0.00120927	0.00192877	C9orf106	0.336023	0.0538102	-2.64261	8.66e-38	1.01e-35
	SPRR2D	HIST1H3F	KCNE1B	FAM64A	SLC30A8		LRRC73	2.09329	1.60303	2.09493e-40	1.65219e-39	MAB21L1	-2.69507	1.01595	1.95707e-135	9.44965e-134		PKMYT1		KIFC1	1.37207	11.4062	3.0554	2.2e-58	1.93e-56							AC002524.1	0.285691	0.661363	1.21098	3.06e-23	4.35e-22	EPN3	13.0186	5.79664	-1.16729	2.03e-15	1.23e-14
	EZH2	RP11-191L9.4	LMO7DN-IT1	KRT34	KRT18P11		KLK4	3.07586	1.71988	2.44385e-40	1.92153e-39	SGCA	-3.12264	0.254246	2.16762e-135	1.04385e-133		HRC		KCNJ10	0.0512157	0.273143	2.415	3.38e-30	1.89e-29							AFAP1-AS1	0.234509	3.99342	4.08991	3.11e-22	3.9e-21	AP003306.1	0.469246	0.230901	-1.02307	2.03e-05	4.09e-05
	TCAM1P	RP11-114M1.2	C6	OXGR1	RP11-473L15.3		ENTHD1	2.86378	-1.29031	2.80109e-40	2.19861e-39	SYNPO2	-2.5369	6.22232	2.87738e-135	1.37833e-133		SPTB		FABP6	0.0469365	0.903632	4.26695	2.31e-13	5.26e-13							SLC6A15	0.0822108	1.16867	3.8294	4.53e-11	1.73e-10	FAM174B	18.0431	8.59492	-1.06989	9.03e-25	1.53e-23
	LINC00511	OR7E91P	GRIN2B	CDH19	CALY		MYT1	4.50608	1.98951	2.9283e-40	2.29647e-39	ANGPT1	-2.7465	2.89569	3.19156e-135	1.52081e-133		MAB21L1				CAND2	C1QTNF3									HLA-F	13.2136	28.3541	1.10153	7.34e-14	3.78e-13	ZNF385A	28.1323	10.0043	-1.4916	4.72e-34	3.02e-32
	ALKAL1	OPRD1	LINC00640	BARX1	ADCY5		APOBEC3B	2.58602	3.45759	4.84877e-40	3.77161e-39	MICU3	-2.22463	1.3543	5.79671e-135	2.74776e-133		SGCA				AC080038.2	EPB41L5									CAND2	0.74533	1.56299	1.06835	1.98e-06	4.51e-06	C1QTNF3	6.1684	2.80929	-1.13469	5.99e-19	5.25e-18
	MIR4653	RP11-161I6.2	CTA-315H11.2	UCA1	SMCR2		ACTL8	7.84276	2.41282	5.71768e-40	4.43799e-39	PALM2-AKAP2	-2.76369	-0.137529	9.08881e-135	4.29706e-133		SYNPO2				VPREB3	ITGB5									AC080038.2	0.142432	0.966267	2.76215	9.62e-17	6.71e-16	EPB41L5	5.86504	2.82878	-1.05196	5.95e-31	2.28e-29
	RP13-16H11.9	7SK	NTRK2	LINC01096	PYY		IGFL2	3.20956	0.860836	6.064e-40	4.69676e-39	MYLK	-2.2095	7.42362	1.96631e-134	9.27231e-133		KIF4A				TMOD1	AC004947.2									VPREB3	1.24468	3.95347	1.66734	3.15e-13	1.52e-12	ITGB5	48.3434	24.0091	-1.00974	5.61e-26	1.11e-24
	FAM72B	TYRP1	AC073072.5	HIF3A	RP11-358L22.2		SYT13	5.01696	6.07657	6.41558e-40	4.96483e-39	CACHD1	-2.09997	4.29355	1.97671e-134	9.2972e-133		ANGPT1				PRKX	LINC01843									TMOD1	0.442681	1.58517	1.8403	9.31e-14	4.75e-13	AC004947.2	0.228504	0.0827306	-1.46572	1.7e-15	1.04e-14
	HAO1	SNORD17	TP63	LINC02003	CTD-2589M5.4		IGFL3	4.87645	-0.806082	6.76152e-40	5.23031e-39	S1PR1	-2.0165	4.94774	3.40631e-134	1.59385e-132		MICU3				ACTG2	SLC4A8									PRKX	3.98458	12.7245	1.67511	2.86e-39	4.54e-37	LINC01843	1.06612	0.096768	-3.46169	1.03e-36	9.97e-35
	PNMA5	RP11-68I3.7	AC114877.3	CENPF	CCNO		ACAN	4.30602	4.07117	1.64086e-39	1.25167e-38	EBF2	-2.25432	2.43182	5.50776e-134	2.57053e-132		PALM2-AKAP2				LINC02188	AP005121.1									ACTG2	7.54792	63.0715	3.06284	2.21e-08	6.25e-08	SLC4A8	2.19254	0.299383	-2.87254	5.37e-40	1.01e-37
	MAEL	LA16c-380H5.6	LINC01028	CYYR1	RP11-333E13.4		ERMN	2.55063	1.03884	2.37116e-39	1.79968e-38	KL	-2.46262	1.54066	9.00985e-134	4.18347e-132		MYLK				MALL	CYSRT1									LINC02188	0.527097	7.0408	3.7396	4.86e-37	4.93e-35	AP005121.1	1.65116	0.0174329	-6.56553	1.72e-36	1.59e-34
	TLX1NB	CTA-384D8.34	GPC3	SLC15A1	CYBRD1		ULBP1	3.09449	0.794172	2.8228e-39	2.13266e-38	MGLL	-2.19366	6.83018	1.5422e-133	7.14252e-132		CACHD1				ADRA2B	POTEKP									MALL	0.472451	1.38863	1.55542	6.02e-13	2.8e-12	CYSRT1	2.2074	0.799289	-1.46556	3.07e-23	4.35e-22
	FNDC1-IT1	RP13-49I15.6	C8orf22	BMP2	AC008069.2		RIIAD1	3.35113	-0.0249057	3.56634e-39	2.68326e-38	FAM13C	-2.23145	1.68944	7.49183e-133	3.46092e-131		S1PR1				IGKV1-33	RGS22									ADRA2B	0.285903	0.634887	1.15098	5.7e-11	2.16e-10	POTEKP	4.84733	0.10703	-5.50111	1.39e-39	2.38e-37
	LINC02086	RGS8	BMP2	IGLV4-69	AC104667.3		CIB3	3.02969	-0.675589	4.63171e-39	3.4733e-38	ITPRIPL1	-2.36527	1.72613	1.70691e-132	7.8652e-131		EBF2				RAP2A	MAGED2									IGKV1-33	0.642438	3.38103	2.39583	1.45e-05	2.98e-05	RGS22	1.51076	0.0730355	-4.37053	3.89e-39	5.98e-37
	KIF18B	PRDX1P1	ATF3	PIWIL4	CXADRP1		CFB	2.56076	5.91506	4.72324e-39	3.53953e-38	CLIC5	-2.41499	3.28929	1.04847e-131	4.80682e-130		KL				XAGE2	GALNT10									RAP2A	7.53919	15.0922	1.00132	6.67e-21	7.28e-20	MAGED2	314.555	94.9643	-1.72785	2.44e-39	3.96e-37
	RP11-268P4.5	CALHM1	RELN	AL161668.5	CHGA		HIST1H3B	5.53242	-0.429368	5.14898e-39	3.85166e-38	ASB5	-6.13515	-0.436955	1.08889e-131	4.97955e-130		MGLL				AL445189.2	RIPOR3									XAGE2	0.348668	6.74995	4.27495	9.99e-15	5.63e-14	GALNT10	14.3821	5.63368	-1.35213	2.2e-32	1.09e-30
	OR7E39P	ORM1	MYL1	DGAT2	FAM81B		LINGO1	2.50877	4.58813	6.66022e-39	4.9678e-38	AQP1	-2.08715	7.41549	2.44386e-131	1.11478e-129		FAM13C				APBA2	PNPLA4									AL445189.2	0.684244	1.54075	1.17105	0.00301423	0.00454491	RIPOR3	1.85605	0.492026	-1.91543	9.92e-12	4.07e-11
	FOXD3	ZBED2	C2orf40	RP11-379P15.1	PRSS23		DNAAF3	2.43867	1.94563	1.4732e-38	1.08812e-37	HSPB2	-2.50225	0.653172	2.5108e-131	1.14244e-129		ITPRIPL1				BAIAP2L2	ZNF91									APBA2	0.775413	2.74325	1.82285	1.73e-29	5.34e-28	PNPLA4	10.1789	4.87048	-1.06344	2.16e-29	6.59e-28
	CTD-2532K18.2	PMCH	RP11-831A10.1	MIMT1	CAPN9		OASL	2.37104	4.36091	1.77173e-38	1.3049e-37	ALDH1A2	-2.79532	2.16222	2.89917e-131	1.31586e-129		CLIC5				ITGB8	HIST1H2AI									BAIAP2L2	0.798311	2.89332	1.8577	1.37e-16	9.38e-16	ZNF91	4.94755	2.15139	-1.20145	2.57e-27	6.05e-26
	MKRN3-AS1	IFNL2	FAM189A2	SLC6A2	POTEH		CNTNAP2	3.95327	5.27359	2.28022e-38	1.67329e-37	STAB2	-2.92564	0.390536	6.11763e-131	2.76282e-129		ASB5				IGLC2	FUT8-AS1									ITGB8	2.18773	4.81853	1.13916	2.53e-17	1.86e-16	HIST1H2AI	5.05944	1.86395	-1.44061	8.19e-05	0.000153128
	KLHDC7B	FGF5	HOXA2	CYP39A1	TMEM150C		LYPD1	2.24111	0.70726	2.57545e-38	1.8869e-37	ABCB5	-3.57342	0.0524857	6.94443e-131	3.12844e-129		AQP1				TNFRSF17	HPN									IGLC2	275.944	656.994	1.2515	2.87e-09	8.99e-09	FUT8-AS1	0.732432	0.18518	-1.98377	1.11e-25	2.11e-24
	BACH1-IT3	PLEKHD1	LINC01402	MELK	LDLRAD1		CDKN2A	2.76157	4.38517	3.65237e-38	2.66514e-37	KY	-3.31995	-0.523961	1.12616e-130	5.06074e-129		HSPB2				TCF7L1	AC105285.1									TNFRSF17	1.39279	3.10363	1.15598	1.5e-05	3.09e-05	HPN	15.59	6.21633	-1.32649	1.71e-17	1.29e-16
	LINC02159	SLC30A8	RP11-494M8.4	ZIC4	ROBO2		FOXH1	2.26167	-1.47347	3.73847e-38	2.72469e-37	FSD2	-3.7165	-1.17905	1.12894e-130	5.06074e-129		ALDH1A2				RUBCNL	GRP									TCF7L1	5.64621	18.7192	1.72916	9.6e-32	4.27e-30	AC105285.1	0.453861	0.221405	-1.03557	7.45e-20	7.21e-19
	TCHHL1	BPIFB1	SLC7A3	IL36G	SLC2A10		KISS1R	4.12333	0.383617	4.42433e-38	3.2181e-37	HLF	-2.8527	3.76696	4.23955e-130	1.89113e-128		PCLAF				GPRC5B	MAPT									RUBCNL	0.854381	1.9641	1.20092	5.35e-13	2.51e-12	GRP	6.36996	2.50921	-1.34405	1.04e-12	4.74e-12
	COX7B2	RP11-357H14.17	NXNL1	RP11-766F14.2	GALNT5		FAM57B	2.86051	1.22703	5.85941e-38	4.2517e-37	SYNM	-3.08768	6.70971	7.60513e-130	3.37582e-128		STAB2				CTPS1	RAB31									GPRC5B	4.73764	11.9435	1.33398	8.44e-21	9.12e-20	MAPT	11.2135	1.09258	-3.35943	8.18e-38	9.58e-36
	RP11-1029M24.4	CEACAM5	STON1-GTF2A1L	OPRK1	OTOR		LRTM2	5.57314	0.907347	6.3956e-38	4.63337e-37	TCEAL7	-2.15883	1.25268	1.31142e-129	5.80704e-128		ABCB5				AC027601.3	TUBA3C									CTPS1	5.98122	12.6953	1.08579	6.31e-30	2.09e-28	RAB31	39.1844	16.5467	-1.24374	2.44e-18	1.98e-17
	LAG3	RN7SL5P	MYOCD	CCKBR	CASQ1		CSMD2	2.11477	1.94489	1.196e-37	8.57897e-37	PQLC2L	-2.86744	0.886165	1.63228e-129	7.21021e-128		KY				IRX6	AC012404.1									AC027601.3	0.37524	0.790334	1.07465	1.11e-12	5.04e-12	TUBA3C	0.236859	0.0499633	-2.24509	1.71e-05	3.5e-05
	DPP10-AS1	DEPDC1-AS1	RGS6	GTSE1	LAMP5		HIST1H4E	4.0846	0.650214	1.27865e-37	9.16094e-37	CDKN1C	-2.08769	4.18362	2.57121e-129	1.13028e-127		FSD2				ACHE	LY6G6C									IRX6	0.389602	1.05662	1.43938	3.4e-07	8.45e-07	AC012404.1	0.253648	0.121521	-1.06162	4.65e-07	1.14e-06
	MOG	CTA-280A3.2	S100B	RP1-50J22.4	TPH1		HIST1H2BF	3.86746	0.059161	1.45666e-37	1.04258e-36	AVPR2	-2.7292	0.688099	5.45966e-129	2.38844e-127		HLF				DPYSL4	ENTPD5									ACHE	0.441851	1.72228	1.96269	7.6e-08	2.03e-07	LY6G6C	2.27844	0.806412	-1.49846	2.45e-05	4.89e-05
	AP000439.5	RP11-557C9.3	PROX1	RP11-595B24.2	UGT2B4		ETV7	2.01072	2.81354	1.55706e-37	1.11337e-36	SOX17	-2.16518	2.2333	6.45458e-129	2.8169e-127		SYNM				CDC42EP1	SYDE2									DPYSL4	0.981981	2.01953	1.04025	0.0146097	0.0198705	ENTPD5	6.59478	2.4301	-1.44031	7.46e-24	1.13e-22
	RP11-366F6.2	RP11-157F20.3	TEPP	C11orf87	RP11-535N6.2		FAM72C	2.68585	-1.51633	2.51855e-37	1.7889e-36	FAM149A	-2.10801	2.08878	8.0565e-129	3.49918e-127		TCEAL7				TFR2	GCM1									CDC42EP1	26.065	60.3963	1.21235	2.53e-23	3.63e-22	SYDE2	2.42106	1.19946	-1.01325	1.45e-12	6.48e-12
	POU4F1	KIF1A	DLGAP2	STX19	LINC01856		NPW	4.14033	0.727544	2.71925e-37	1.92844e-36	CETP	-2.24135	1.13182	3.17284e-128	1.37477e-126		PQLC2L				IGHV5-51	AL136981.2									TFR2	0.653494	1.36141	1.05886	1.69e-05	3.46e-05	GCM1	0.279746	0.0744982	-1.90884	5.48e-09	1.67e-08
	NOTUM	RP11-25L3.1	LINC00484	CCNB2	LINC00593		CRABP2	2.14899	9.08367	2.84574e-37	2.01421e-36	PRRG3	-2.95996	0.886425	4.18514e-128	1.80908e-126		HSD17B6				LARGE2	IGF1R									IGHV5-51	83.0108	199.012	1.26148	4.15e-05	8.08e-05	AL136981.2	1.00907	0.490316	-1.04125	4.93e-20	4.87e-19
	RP5-1121A15.3	CST5	SLC47A1P1	RP11-569G13.3	CTD-2583A14.11		HIST2H2BF	2.71824	1.84397	3.62126e-37	2.54921e-36	SCTR	-2.94044	-2.05424	4.79773e-128	2.06895e-126		CDKN1C				LINC00239	MAG									LARGE2	5.28591	16.8225	1.67017	1.09e-20	1.17e-19	IGF1R	26.3886	6.17225	-2.09604	1.57e-26	3.28e-25
	CACNA1B	C2orf54	AC097713.3	ASB12	RP11-624L4.1		MAPK15	2.69249	4.03889	4.77166e-37	3.34476e-36	COX7A1	-2.48069	3.39159	5.09865e-128	2.19351e-126		SPC25				S100A9	ADCY5									LINC00239	0.294278	0.695511	1.24089	1.27e-21	1.49e-20	MAG	0.478678	0.0404979	-3.56314	1.75e-34	1.17e-32
	ISL2	KLHDC7B	GALR1	SLC2A12	SIGIRR		SPEF1	2.44431	1.50397	4.9571e-37	3.47207e-36	TMEM255A	-2.24875	1.91031	8.86459e-128	3.79567e-126		AVPR2				UGT8	MIR3189									S100A9	278.485	610.974	1.13351	1.39e-18	1.16e-17	ADCY5	2.81009	0.479621	-2.55065	6.7e-23	9.09e-22
	MYT1L-AS1	RNU4-2	RP5-888M10.2	MAP7D2	KCNC2		MROH6	2.01564	3.73623	5.26892e-37	3.68479e-36	AKR1C1	-3.43145	4.23468	1.13689e-127	4.85653e-126		SOX17				STMN1	PLAC1									UGT8	0.579698	7.6104	3.7146	2.76e-36	2.46e-34	MIR3189	1.18733	0.207218	-2.5185	2.3e-18	1.88e-17
	SERPINB7	RN7SL4P	RP11-626H12.1	RP4-673D20.3	CHRNA9		LRFN2	2.75446	-0.0144241	7.19629e-37	5.01146e-36	HAS3	-2.90321	3.43088	1.3444e-127	5.72947e-126		FAM149A				DSG1	LINC01863									STMN1	29.4085	72.409	1.29994	5.08e-29	1.49e-27	PLAC1	0.84196	0.305869	-1.46084	2.54e-15	1.53e-14
	KIFC1	CTD-2008P7.8	LRRN3	TICRR	SOWAHA		HIST1H4H	2.65261	3.06766	7.45313e-37	5.18833e-36	FAM162B	-2.13751	-0.120761	1.48935e-127	6.33235e-126		CETP				AL773545.3	PLA2G16									DSG1	0.566314	8.17748	3.85198	1.74e-13	8.6e-13	LINC01863	0.59851	0.0333255	-4.16668	2.71e-33	1.51e-31
	RP11-10O22.1	JPH3	ENAM	EDAR	CCDC87		CXCL9	3.17577	6.72005	1.12793e-36	7.80692e-36	GPRASP1	-2.03682	3.1792	5.68517e-127	2.39476e-125		PRRG3				S100A2	KCNK15-AS1									AL773545.3	0.454177	0.985466	1.11755	9.01e-06	1.9e-05	PLA2G16	33.9095	14.6867	-1.20717	1.38e-19	1.3e-18
	LHX5	C1orf194	PIK3C2G	SPIC	ADRA2A		DMBX1	3.16866	-0.430336	1.99805e-36	1.37352e-35	EDNRB	-2.15776	3.89222	1.23286e-126	5.18116e-125		SCTR				DDX11-AS1	ADGRB2									S100A2	5.58757	68.9488	3.62523	1.15e-15	7.18e-15	KCNK15-AS1	0.663839	0.259047	-1.35762	9.31e-18	7.18e-17
	CCL7	SNORD15B	NRG2	KB-1991G8.1	THSD4-AS1		TGFBR3L	3.06965	-0.614591	2.45598e-36	1.68194e-35	SLC22A12	-4.85005	-2.97147	4.25504e-126	1.77587e-124		COX7A1				IGLVI-70	FBLL1									DDX11-AS1	0.362215	0.732411	1.01581	1.33e-15	8.24e-15	ADGRB2	5.16446	1.17796	-2.13233	5.4e-29	1.58e-27
	RP5-884M6.1	SOX11	HBG2	DPF3	PVALB		HIST2H2AC	3.06525	0.641665	2.70303e-36	1.84834e-35	EGR1	-2.66601	8.57038	8.38206e-126	3.49028e-124		TMEM255A				PLEKHB1	AL161646.1									IGLVI-70	1.61786	6.99244	2.11171	0.000726435	0.00119649	FBLL1	1.03138	0.4672	-1.14246	0.00233183	0.00357489
	CXCL11	LINC01238	AC004160.4	LINC01883	CISH		DEGS2	2.52661	6.23607	3.29215e-36	2.24358e-35	FGF1	-2.08301	4.2144	4.80048e-125	1.98979e-123		AKR1C1				COL26A1	RNA5SP195									PLEKHB1	4.82398	13.1146	1.44288	1.46e-16	1e-15	AL161646.1	1.53048	0.265499	-2.52721	6.29e-12	2.64e-11
	MYBL2	SLC6A4	LINC01405	CHRNA5	GRPR		HIST1H4K	2.47064	-1.52751	3.29737e-36	2.24629e-35	HBA1	-4.05564	-2.38843	7.21038e-125	2.98188e-123		HAS3				KLK7	AP004371.1									COL26A1	0.176949	1.51428	3.09723	2.25e-08	6.35e-08	RNA5SP195	0.240736	0.0799737	-1.58985	1.93e-05	3.9e-05
	AP000998.2	SCARNA5	RP11-35J10.6	DMRTA2	RHOT1P1		KCNJ10	2.42167	0.389495	3.81733e-36	2.59273e-35	KIT	-2.96611	5.98832	1.30329e-124	5.37757e-123		FAM162B				AL731533.2	CGA									KLK7	1.9601	17.9167	3.19231	1.14e-19	1.08e-18	AP004371.1	0.29901	0.0206494	-3.85602	2.21e-20	2.29e-19
	CTAG2	CYP2B7P	LOC100421166	CTD-3080F16.3	CST5		UNC13A	3.96947	2.21859	4.45041e-36	3.01482e-35	FAM89A	-2.47468	3.24546	6.69158e-124	2.74234e-122		ASF1B				AC004687.1	AC017074.1									AL731533.2	0.179201	0.492507	1.45857	1.41e-19	1.32e-18	CGA	17.4389	1.02496	-4.08866	5.8e-19	5.09e-18
	TRIM43	CLDN6	CNTNAP3	MKI67	RP11-27M9.1		ATP1A3	3.24053	2.08961	4.57868e-36	3.10056e-35	TSHZ2	-2.38283	4.61303	2.61052e-123	1.06503e-121		GPRASP1				TCF15	AC026355.3									AC004687.1	0.69066	1.46357	1.08345	6e-06	1.29e-05	AC017074.1	0.847673	0.411879	-1.04129	4.26e-16	2.78e-15
	OTX1	GAD1	AC005682.6	CA3	SPATA17		HIST1H1C	2.3013	6.49996	5.33105e-36	3.59796e-35	MEOX2	-2.71659	2.84196	5.03565e-123	2.04982e-121		EDNRB				KRT7	AF186192.1									TCF15	0.299512	0.825315	1.46233	2.99e-07	7.49e-07	AC026355.3	0.293275	0.0652502	-2.1682	9.59e-07	2.26e-06
	SIX3	TRH	SLC8A3	C1QL4	RP11-312A15.2		PPP2R2C	3.52209	4.53105	8.33583e-36	5.58645e-35	PRG4	-3.49888	3.64427	6.53393e-123	2.65377e-121		SLC22A12				ZC4H2	COL14A1									KRT7	98.775	220.38	1.15778	1.19e-17	9.09e-17	AF186192.1	1.33107	0.561026	-1.24644	8.77e-14	4.48e-13
	RNASE10	RP11-254F7.4	NTF4	RP11-54H7.4	CYP2A7		CPNE7	2.58732	3.28601	8.91664e-36	5.97349e-35	VGLL2	-5.62248	-2.29982	7.47582e-123	3.02279e-121		EGR1				POMC	FSIP1									ZC4H2	1.07509	2.62272	1.28661	5.22e-16	3.39e-15	COL14A1	14.6058	6.59705	-1.14665	6.73e-11	2.53e-10
	LINC02003	FSD1	LINC01594	RP5-1039K5.16	C2orf50		AMZ1	2.67004	2.15359	9.13638e-36	6.11619e-35	CAMK2A	-2.91438	0.0970083	1.58969e-122	6.38512e-121		CDC25C				GBP1P1	AC130456.3									POMC	0.385182	2.06822	2.42478	2.23e-20	2.31e-19	FSIP1	8.05158	0.363124	-4.47074	2.38e-46	2.23e-43
	DLX6	RP11-126H7.4	MYO18B	FAM72C	RNF224		WT1	4.58866	2.45032	1.35618e-35	9.03539e-35	ALAS2	-3.25009	-2.36841	1.64975e-122	6.61174e-121		FGF1				AFDN-DT	AC004832.4									GBP1P1	1.29641	4.35097	1.74681	1.44e-11	5.8e-11	AC130456.3	0.326035	0.11483	-1.50553	5.46e-16	3.53e-15
	RP11-657O9.1	PYDC1	THRSP	PACRG-AS1	METRN		FOXJ1	4.48837	2.74323	1.79951e-35	1.19452e-34	FOSB	-3.38534	6.91256	1.76954e-122	7.07621e-121		HBA1				TUNAR	MEIS3P1									AFDN-DT	0.488391	1.10035	1.17185	2.37e-16	1.59e-15	AC004832.4	0.6938	0.271159	-1.35538	1.77e-13	8.73e-13
	C11orf86	FOXD1	PTGES3P2	KIF15	CREB3L4		CAPN9	2.73245	3.12401	1.81484e-35	1.20425e-34	NRN1	-2.21995	4.181	3.7191e-122	1.48071e-120		KIT				DZIP1	AC087623.1									TUNAR	0.115286	1.28349	3.47678	0.000737463	0.00121283	MEIS3P1	4.82874	2.26128	-1.09451	5.29e-19	4.67e-18
	TMEM171	IGHG1	MME-AS1	KIRREL3-AS1	REEP6		HIST1H4J	2.42135	-1.9399	1.87582e-35	1.24381e-34	DEPP1	-2.20002	6.70179	5.53314e-122	2.19812e-120		FAM89A				PAEP	NAT1									DZIP1	1.03848	2.62613	1.33847	8.24e-17	5.79e-16	AC087623.1	2.64541	1.23436	-1.09973	2.23e-05	4.47e-05
	MROH3P	IL20	RP11-470P21.2	GSG2	MYB		TMEM249	2.58306	-1.55727	3.70363e-35	2.43356e-34	TMEM100	-3.23165	2.243	9.80612e-122	3.87865e-120		IQGAP3				FAM171A1	AC120498.2									PAEP	0.378815	1.20716	1.67205	0.00977398	0.0136658	NAT1	60.7097	1.71932	-5.14202	3.45e-44	1.83e-41
	C14orf105	PPM1E	SAA2	KCNIP1	MMEL1		IL9R	2.07781	-1.05974	3.78997e-35	2.4885e-34	RNF150	-2.5997	4.26195	1.29091e-121	5.09487e-120		TSHZ2				CHRM1	HABP2									FAM171A1	3.86246	19.6711	2.34848	5.57e-42	1.71e-39	AC120498.2	0.420403	0.0877811	-2.25979	2.32e-13	1.14e-12
	RP11-608O21.1	RP11-557C9.1	AC139099.4	LINC02095	IL20		RDH16	2.66141	1.73862	4.56885e-35	2.99233e-34	ADAM33	-2.7032	2.91031	1.98937e-121	7.8345e-120		MEOX2				TRBV4-1	SULT1A2									CHRM1	0.885924	3.72734	2.07289	2.09e-21	2.4e-20	HABP2	0.373627	0.116159	-1.6855	1.9e-10	6.8e-10
	RCOR2	LINC01505	BMP3	RP11-467J12.4	IGF1R		MYBL1	2.1501	4.26579	5.84478e-35	3.81835e-34	CMYA5	-2.67184	5.75557	3.75975e-121	1.47745e-119		PRG4				AC011352.1	ANKS1B									TRBV4-1	0.490993	1.05732	1.10664	1.44e-05	2.97e-05	SULT1A2	1.04002	0.307301	-1.75889	9.87e-24	1.49e-22
	XXbac-BPG27H4.8	GPR37L1	RP11-6E9.4	CDKN2A	RP5-862K6.4		HPN	2.23599	5.50072	7.10454e-35	4.62805e-34	TMEM252	-3.15767	-2.36776	3.81306e-121	1.49517e-119		VGLL2				NALCN	AL133387.1									AC011352.1	0.256937	0.872437	1.76364	4.07e-08	1.12e-07	ANKS1B	0.987979	0.393321	-1.32877	2.87e-22	3.62e-21
	RP11-352B15.2	AP000696.2	AGMO	RYR3	FFAR2		HIST1H2AL	4.13213	-2.10121	7.11951e-35	4.63611e-34	B3GALT1	-3.14703	-0.445314	2.89513e-120	1.12792e-118		CAMK2A				NKX1-2	AL357054.4									NALCN	0.371442	0.918145	1.30559	0.0187245	0.0250564	AL133387.1	1.82757	0.0329004	-5.79568	2e-41	5.32e-39
	ZNF679	LCN12	AK5	MMP12	KCNH1		OTX1	2.53695	2.04557	7.15035e-35	4.65452e-34	SLC29A4	-2.49312	3.49055	3.57226e-120	1.38578e-118		ALAS2				IGLV5-48	C18orf65									NKX1-2	0.160969	1.82868	3.50594	1.04e-42	3.85e-40	AL357054.4	0.809856	0.270212	-1.58357	1.62e-17	1.22e-16
	NPTX2	DSCAM-AS1	RP11-44B19.1	CDCA3	TRERF1		NAT1	3.25105	7.10024	7.67637e-35	4.98799e-34	SMCO1	-4.95245	-1.4737	1.21715e-119	4.70157e-118		FOSB				NCALD	AL356740.2									IGLV5-48	0.33551	1.11215	1.72893	0.000828796	0.00135364	C18orf65	0.317111	0.0968715	-1.71084	1.82e-24	2.97e-23
	SCHLAP1	RP4-697K14.15	IRX6	CTA-384D8.35	RP11-830F9.7		TEX19	4.73167	-1.22076	9.05613e-35	5.87613e-34	PDE1C	-2.77737	2.746	1.29838e-119	5.00469e-118		NRN1				ECE2	SCARNA5									NCALD	3.33792	10.0323	1.58762	1.65e-07	4.24e-07	AL356740.2	0.510372	0.251245	-1.02246	4.9e-10	1.68e-09
	CTD-2008P7.8	HS6ST3	OTC	ULBP2	RP11-107I14.5		MMP9	3.37069	7.32918	9.92553e-35	6.42646e-34	APOLD1	-2.02513	5.47343	1.90895e-119	7.32706e-118		DEPP1				SLC22A31	TOB1									ECE2	1.72826	4.44346	1.36237	5.54e-29	1.61e-27	SCARNA5	84.6078	1.94464	-5.44321	1.86e-05	3.79e-05
	OR7E156P	TNNI3	GADL1	RGS2	RP11-132A1.6		COL22A1	3.08287	3.1711	1.06597e-34	6.89447e-34	CHL1	-2.94709	3.88977	4.08582e-119	1.55836e-117		UHRF1				RPSAP69	MIR5691									SLC22A31	0.109094	1.07971	3.307	4.14e-20	4.13e-19	TOB1	88.4706	35.3761	-1.32242	6.42e-26	1.26e-24
	MAGEA9B	MIR8071-2	CTD-2540B15.6	SMTNL2	CTD-2270L9.4		PRR15	2.38606	5.24454	1.11375e-34	7.19579e-34	INMT	-2.49895	2.57355	2.08186e-118	7.84153e-117		TMEM100				HRASLS	SCN1B									RPSAP69	0.359608	0.819921	1.18906	1.17e-11	4.79e-11	MIR5691	0.812787	0.0356003	-4.51291	9.82e-18	7.56e-17
	NCCRP1	AC093063.2	TCEAL6	C4orf26	LINC01489		PLPPR5	3.12132	-1.62104	1.59258e-34	1.02456e-33	ADCYAP1R1	-2.63461	1.84323	3.16563e-118	1.1899e-116		RNF150				LY6K	FAM3B									HRASLS	1.71394	5.98884	1.80496	8.19e-31	3.05e-29	SCN1B	2.07512	0.981897	-1.07955	7.68e-17	5.41e-16
	ZIC1	ST8SIA6-AS1	EFCAB1	PTGFR	PEX5L		MEX3A	2.05344	5.67418	2.82753e-34	1.80626e-33	PGM5	-2.5214	3.47765	2.54034e-117	9.50927e-116		ADAM33				AC107294.1	AC106738.2									LY6K	1.02979	3.87722	1.91267	1.55e-11	6.24e-11	FAM3B	4.23121	1.94521	-1.12115	0.00873792	0.0123302
	CFHR4	SCARNA10	RP11-439C8.2	CTD-2023N9.1	RP5-1002M8.4		SCUBE3	2.91103	4.51675	2.88777e-34	1.84409e-33	DMRT2	-2.79008	0.359518	3.95574e-117	1.47467e-115		CMYA5				TMEM71	AC024941.2									AC107294.1	0.157167	0.523561	1.73606	1.64e-10	5.9e-10	AC106738.2	2.97796	0.225331	-3.72421	9.38e-43	3.55e-40
	RN7SL393P	TRPM5	MYLKP1	MLIP	CNGA3		ARMC3	2.859	1.44159	2.93414e-34	1.87304e-33	APCDD1	-2.13418	4.87506	8.94676e-117	3.32165e-115		TMEM252				ATP6V1C2	NELL2									TMEM71	0.632312	2.54128	2.00685	8.57e-21	9.25e-20	AC024941.2	0.554026	0.218057	-1.34525	6.38e-19	5.57e-18
	PRB2	RPSAP65	DPP6	MTFR2	ADCY1		KCNG3	2.79388	-0.802327	2.98032e-34	1.90186e-33	NDRG2	-2.18882	6.92183	1.59412e-116	5.90638e-115		UBE2T				GABRA3	LINC02571									ATP6V1C2	1.15826	5.7971	2.32338	2.3e-36	2.07e-34	NELL2	9.49424	1.66846	-2.50854	7.71e-09	2.3e-08
	XAGE2	AC013268.3	OGN	SLC35F3	LINC01342		CAPSL	3.95863	0.407514	3.09022e-34	1.97129e-33	PER1	-2.0544	5.70253	1.75541e-116	6.49073e-115		B3GALT1				LINC00839	AC022107.1									GABRA3	0.256742	0.615603	1.26168	4.72e-10	1.62e-09	LINC02571	0.544284	0.143535	-1.92296	8.3e-15	4.7e-14
	NT5DC4	CCNO	NR4A3	C1orf105	ATP1A2		HIST1H2BL	3.55679	-1.36493	4.8778e-34	3.10072e-33	ADGRD1	-2.53251	2.35286	2.15762e-116	7.96172e-115		NUSAP1				IGKV1-13	AC013726.1									LINC00839	0.604792	3.14697	2.37945	3.34e-22	4.17e-21	AC022107.1	1.63346	0.675786	-1.27329	4.62e-34	2.97e-32
	NLRP7	CCDC185	GFRA2	PGA5	MS4A8		CADPS	3.42569	1.08908	6.26997e-34	3.97455e-33	RYR1	-3.0607	3.89146	5.1348e-116	1.88709e-114		SLC29A4				AC136428.1	GRIK3									IGKV1-13	0.448326	0.964152	1.10471	6.74e-05	0.000127576	AC013726.1	1.13119	0.0904239	-3.645	2.15e-42	7.05e-40
	CCL20	RNU4-1	PTN	FBN3	TTC16		CBLN2	6.0945	3.95074	6.43623e-34	4.07568e-33	CLDN5	-2.5602	4.00536	1.09676e-115	4.01446e-114		SMCO1				KIF18B	KCNE4									AC136428.1	0.671764	1.907	1.50528	0.00164236	0.00257199	GRIK3	2.88167	0.548996	-2.39204	1.1e-28	3.12e-27
	DPYSL5	CARD17	SCN2A	CRYAB	CTA-392C11.1		LHFPL5	3.78759	-0.461295	9.71336e-34	6.12313e-33	LRRC38	-3.69833	-2.84785	1.10475e-115	4.03556e-114		PDE1C				AC004637.1	AC007342.8									KIF18B	2.33706	5.48033	1.22957	1.51e-23	2.22e-22	KCNE4	22.209	2.69706	-3.04168	8.06e-25	1.37e-23
	ACOD1	GDPD2	ELANE	DIAPH3	2019-03-10		NT5DC4	3.04652	-1.98328	1.29014e-33	8.08505e-33	SEL1L2	-3.58147	-2.47593	2.85925e-115	1.0382e-113		APOLD1				AL121820.1	CFL1P5									AC004637.1	0.1025	0.8731	3.09053	5.88e-05	0.000112002	AC007342.8	0.628852	0.278203	-1.17658	4.75e-10	1.63e-09
	HOXB-AS4	GABRA5	ACKR1	KB-173C10.2	SCCPDH		GAL3ST2	4.05064	0.0236362	1.50791e-33	9.43031e-33	SFTPB	-4.51632	1.21282	4.17852e-115	1.51117e-113		TPX2				BCL11A	SYNPO2									AL121820.1	0.214795	0.810096	1.91513	9.15e-13	4.18e-12	CFL1P5	1.03174	0.438093	-1.23576	3.62e-26	7.32e-25
	KIF2C	MYO3B	RP11-563M4.1	KIF20A	SYNPR-AS1		FGD3	2.05345	5.91279	1.54034e-33	9.62644e-33	NT5C1A	-4.03811	-3.3847	4.37874e-115	1.58044e-113		CHL1				IGHV7-81	AC015987.1									BCL11A	0.593908	4.20121	2.82249	1.21e-42	4.33e-40	SYNPO2	4.23339	2.04006	-1.0532	6.99e-13	3.24e-12
	LINC02195	MIR4666A	LCN6	CLSPN	BRDT		RET	2.93965	6.11315	1.61609e-33	1.00895e-32	CFD	-3.0596	5.79769	5.42597e-115	1.95454e-113		INMT				COL9A1	RN7SL559P									IGHV7-81	0.461107	1.0453	1.18074	0.00212745	0.00328151	AC015987.1	0.636087	0.259662	-1.29259	2.53e-13	1.23e-12
	ALPPL2	AC012531.1	LLNLF-187D8.1	AUNIP	RP11-81K13.1		HOXC10	2.49916	5.32119	2.17759e-33	1.35483e-32	MATN2	-2.5172	5.6644	6.58652e-115	2.36789e-113		ADCYAP1R1				CDCA8	SMPD3									COL9A1	0.100912	0.885042	3.13265	1.51e-11	6.06e-11	RN7SL559P	0.60033	0.0845842	-2.8273	0.000417114	0.000710087
	GNG4	IGFBPL1	LSMEM2	YBX3	CFAP77		SPP1	2.32586	8.06856	2.19749e-33	1.36628e-32	WASF3	-2.13939	3.8318	7.6451e-115	2.74302e-113		PGM5				CDCA3	AGR2									CDCA8	7.84507	20.7475	1.40308	4.9e-31	1.91e-29	SMPD3	1.69509	0.551486	-1.61997	3.73e-21	4.17e-20
	AC107057.1	ELFN1-AS1	AC068057.1	DUSP5P2	SNORA53		EDN2	2.52119	2.89195	2.3733e-33	1.47508e-32	FFAR4	-2.00857	0.979627	1.06195e-114	3.80271e-113		DMRT2				C7orf61	DIO1									CDCA3	2.35593	6.22367	1.40147	6.46e-26	1.26e-24	AGR2	260.09	19.3641	-3.74755	7.09e-46	5.16e-43
	RP11-553K8.5	CCL7	PENK	ERVMER61-1	CFAP45		SLC44A4	2.56	6.99618	2.5154e-33	1.56073e-32	TMOD1	-2.76321	1.95778	1.13115e-114	4.04253e-113		APCDD1				WNT5B	RHBG									C7orf61	0.17677	0.85473	2.27359	1.55e-22	2.02e-21	DIO1	7.67772	1.93752	-1.98647	2.88e-13	1.39e-12
	LINC00393	UNC5A	RP11-362K2.2	GPR19	RP11-265N7.1		RHBG	2.66986	0.375272	2.57016e-33	1.59362e-32	CD209	-2.61611	2.58801	1.74512e-114	6.22449e-113		NDRG2				RF02272	AC106782.6									WNT5B	1.29222	3.00976	1.21979	0.000114135	0.000209358	RHBG	0.462556	0.194131	-1.2526	1.09e-05	2.27e-05
	RP11-495P10.9	RP11-210M15.1	RP11-96C23.14	NCAPG	MED15P4		RAMP1	2.63669	4.25729	2.81864e-33	1.74531e-32	HOXA4	-2.28496	0.29428	3.6872e-114	1.31e-112		PER1				STAG3	AL589739.1									RF02272	0.241631	1.39554	2.52995	6.26e-17	4.44e-16	AC106782.6	1.85106	0.852659	-1.11831	1.12e-20	1.19e-19
	TICRR	VN1R48P	CTA-929C8.5	RP11-182J1.14	AC093642.1		HIST1H2AJ	5.07877	-2.04028	4.29129e-33	2.63649e-32	KCNMB1	-2.41914	3.43565	3.00805e-113	1.05631e-111		ADGRD1				PXDC1	CCDC151									STAG3	0.39401	1.52839	1.9557	3.22e-05	6.35e-05	AL589739.1	0.273852	0.0763852	-1.84203	5.19e-17	3.71e-16
	NKX6-3	DNAJC12	RP11-182J1.14	APOBEC3B	CLEC3A		SYT5	4.17928	0.62497	4.59289e-33	2.81798e-32	TRPM3	-2.71084	-1.31193	6.6657e-113	2.32723e-111		RYR1				CEP55	AC068669.1									PXDC1	10.5993	22.5011	1.08603	1.79e-18	1.49e-17	CCDC151	0.828022	0.300851	-1.46062	3.32e-13	1.6e-12
	CENPA	CITF22-49D8.1	RNF186	RP11-6O2.3	RP11-123K19.1		ARNT2	2.05041	6.12992	4.76464e-33	2.92236e-32	MYH1	-4.03019	1.49726	8.68196e-113	3.02536e-111		HJURP				LAD1	ADRA2A									CEP55	6.4372	15.5852	1.27567	6.41e-24	9.82e-23	AC068669.1	0.239334	0.0762977	-1.64931	1.21e-07	3.16e-07
	AC067960.1	PROZ	DBX2	KIFC1	HOGA1		CSAG1	8.23554	0.426392	4.8294e-33	2.96108e-32	DUPD1	-4.51346	-3.42853	1.23685e-112	4.28532e-111		CLDN5				C22orf23	AL450306.1									LAD1	17.3396	46.4239	1.4208	5.14e-29	1.5e-27	ADRA2A	6.84718	2.55001	-1.42501	5.06e-20	4.99e-19
	RP11-615J4.3	AC068137.13	NSG1	RP11-318G21.4	FAM47E-STBD1		SPOCD1	2.22506	2.46646	4.98256e-33	3.05087e-32	SLC25A34	-2.03828	0.348522	4.4037e-112	1.51419e-110		LRRC38				BMP6	LINC01736									C22orf23	0.642912	1.40075	1.12351	1.05e-16	7.28e-16	AL450306.1	0.2903	0.121226	-1.25984	3.13e-21	3.53e-20
	AACSP1	RNASE10	ALX4	CNTNAP3	SLC9A3R1		PCSK1	6.50593	5.91928	5.11962e-33	3.13057e-32	SLC22A3	-2.82013	1.61113	4.60383e-112	1.58001e-110		SEL1L2				TTK	NXPH3									BMP6	1.10897	4.1166	1.89223	3.18e-05	6.27e-05	LINC01736	0.401122	0.0917227	-2.12869	1.5e-18	1.25e-17
	FCAMR	RP11-54O7.3	FGFBP2	PHYHIPL	FEM1AP2		SAMD11	2.69702	3.04366	6.28626e-33	3.83105e-32	TWIST2	-2.26877	2.49789	1.99017e-111	6.79163e-110		NUF2				AC138904.1	DUSP13									TTK	2.96645	8.22241	1.47082	6.51e-28	1.67e-26	NXPH3	2.48015	0.425053	-2.54471	3.1e-32	1.51e-30
	KCNJ10	HIST1H4B	ART1	RP11-211C9.1	CST9		ELAVL2	2.63659	1.80637	6.70794e-33	4.08119e-32	APOB	-4.2642	1.29761	1.72103e-110	5.80766e-109		SFTPB				AC020928.1	AC093642.2									AC138904.1	0.532367	1.17579	1.14314	4.47e-07	1.1e-06	DUSP13	0.425629	0.0446212	-3.2538	3.68e-20	3.69e-19
	DUX4L9	BMPR1B-AS1	SFRP1	RP11-536O18.1	KRT18P10		BMPR1B	4.26215	7.58806	7.25164e-33	4.40903e-32	LRRC70	-2.02865	-0.285854	3.97297e-110	1.33573e-108		NT5C1A				GCNT3	MUM1L1									AC020928.1	0.190931	0.679412	1.83124	1.37e-08	3.97e-08	AC093642.2	1.08744	0.133143	-3.02989	1.57e-29	4.9e-28
	CDC20	DOK7	CPA2	SIX3	MAPT-IT1		KCNK15	2.50724	4.07978	7.56128e-33	4.59421e-32	NR3C2	-2.1433	3.37151	5.65751e-110	1.89856e-108		CFD				KRT23	LINC00992									GCNT3	0.126987	1.19571	3.23512	4.57e-05	8.83e-05	MUM1L1	2.17881	0.415689	-2.38996	2.01e-23	2.92e-22
	CCKBR	KCNH2	LINC00636	KIF14	RNU4-2		UMODL1	2.84949	0.765224	1.07721e-32	6.51675e-32	ANGPTL7	-4.11854	0.518145	6.18846e-110	2.0729e-108		MATN2				AARD	UBXN10									KRT23	14.4518	70.4216	2.28477	1.19e-19	1.13e-18	LINC00992	1.00531	0.380131	-1.40308	2.82e-10	9.89e-10
	ACP7	ZPLD1	PTGFR	MARCO	PALM		GBP5	2.54195	4.86415	1.87947e-32	1.12762e-31	MEDAG	-2.36013	3.5933	8.93564e-110	2.98211e-108		WASF3				KRT4	LINC02224									AARD	23.312	58.6889	1.33202	9.99e-05	0.000184705	UBXN10	4.66442	0.869721	-2.42307	1.67e-37	1.82e-35
	UGT1A6	LTB	NRG1	RHCG	SIAH2		PARD6B	2.17512	5.75851	1.95255e-32	1.17108e-31	RXRG	-2.98667	-0.572745	8.99645e-110	2.99689e-108		FFAR4				RPL39P40	AC022113.1									KRT4	1.07205	11.9119	3.47396	2.92e-10	1.02e-09	LINC02224	6.27433	0.0204486	-8.26132	9.11e-34	5.49e-32
	RP11-115C10.1	SNORA23	RP11-217E13.1	TMEM100	TESMIN		MIEN1	2.06061	6.53415	2.26696e-32	1.35786e-31	ESR2	-2.0188	-0.212047	2.78465e-109	9.1752e-108		TMOD1				MKI67	SLC26A3									RPL39P40	0.281701	1.46066	2.37438	3.47e-24	5.49e-23	AC022113.1	0.227938	0.0686412	-1.7315	7.54e-18	5.87e-17
	RP11-145G20.1	LINC02195	LINC00645	CCDC150	CYP2B7P		CGA	8.70167	4.67091	2.37428e-32	1.4198e-31	DNASE1L3	-2.74238	0.996749	5.81579e-109	1.91278e-107		CD209				DNAH17	ANO5									MKI67	7.66167	15.5548	1.02163	5.19e-15	3.01e-14	SLC26A3	1.84134	0.788458	-1.22365	9.94e-25	1.67e-23
	TUBB3	SERPINB7	METTL21C	ZC3H12C	CNTD2		NELL2	3.27716	5.68229	2.51812e-32	1.50383e-31	ADH4	-3.71071	-1.66253	7.32492e-109	2.38322e-107		HOXA4				C1orf105	ZNF92									DNAH17	0.207475	0.54057	1.38154	4.73e-07	1.16e-06	ANO5	0.691055	0.283626	-1.28481	0.00351532	0.0052474
	RP11-206P5.2	AGR2	RP4-651E10.4	TUNAR	MIR5691		SPDYC	7.33737	2.69103	2.63566e-32	1.57144e-31	RPL3L	-3.74684	0.887843	9.99301e-109	3.22817e-107		CDK1				WARS	CHN2									C1orf105	0.0645428	1.69072	4.71123	1.24e-05	2.57e-05	ZNF92	12.0883	4.73766	-1.35136	2.01e-19	1.85e-18
	LINC00488	DYDC2	RP11-243M5.2	RGR	GSG1		FBXL16	2.02157	5.0905	2.99333e-32	1.78235e-31	IGF1	-2.48258	2.08204	1.43555e-108	4.61281e-107		PAFAH1B3				CA9	CYP2A13									WARS	21.0839	42.2281	1.00207	3.7e-14	1.96e-13	CHN2	1.00518	0.328956	-1.61148	8.76e-30	2.84e-28
	RHCG	MEIKIN	C20orf166-AS1	RP11-414J4.2	CST9L		HIST1H1E	4.16014	1.35867	3.70954e-32	2.20077e-31	C8orf88	-2.08717	-0.145901	3.2821e-108	1.04355e-106		KCNMB1				MTHFD1L	AK7									CA9	1.61292	13.3673	3.05096	1.4e-28	3.9e-27	CYP2A13	0.280468	0.079935	-1.81094	0.014749	0.0200545
	S100A8	ELFN2	SLC16A12	LINC01559	EVA1B		SLC7A11	2.22042	3.36645	3.8015e-32	2.25396e-31	CPM	-2.03832	5.38169	5.73433e-108	1.81371e-106		UBE2C				Z98257.1	NOS1AP									MTHFD1L	3.32178	10.5176	1.66278	6.3e-34	3.95e-32	AK7	0.468936	0.187433	-1.32301	2.38e-20	2.45e-19
	RP11-1193F23.1	IGHGP	AC006159.5	LINC01606	SFXN5		ADAMDEC1	2.77574	3.23419	4.56436e-32	2.69395e-31	MYADML2	-2.84781	-1.68835	1.56943e-107	4.92959e-106		CCNB1				IGHV3OR16-9	ZNF385B									Z98257.1	0.137073	0.527321	1.94374	0.000576274	0.000961973	NOS1AP	1.1507	0.476811	-1.27102	1.44e-13	7.19e-13
	BUB1	IFNB1	MYBPC1	RP11-303E16.2	RP11-686G23.2		IL19	5.30534	0.0585708	6.08469e-32	3.56922e-31	SLC36A2	-4.10556	-2.25344	2.0777e-107	6.50355e-106		TRPM3				RTP4	AC093510.2									IGHV3OR16-9	0.887667	2.39581	1.43242	1.22e-05	2.53e-05	ZNF385B	2.27531	0.437743	-2.37791	2.89e-11	1.13e-10
	RP11-556I13.2	NPTX2	LINC01340	COL9A3	LINC01522		VGF	3.74802	0.718952	6.71606e-32	3.92943e-31	LMO7DN	-3.02458	-3.53946	4.1547e-107	1.29158e-105		MYH1				AL031587.5	AC121338.2									RTP4	5.55126	13.5738	1.28994	7.65e-11	2.86e-10	AC093510.2	0.223532	0.0828628	-1.43168	3.29e-21	3.7e-20
	KRT6A	HIST1H2AB	CCL21	RP3-340N1.2	CAPSL		NMU	3.70227	1.06691	7.87906e-32	4.59654e-31	CCDC141	-2.57504	-0.221202	4.72876e-107	1.46753e-105		DTL				LINC02446	PCDH10									AL031587.5	0.903414	2.17983	1.27076	6.65e-26	1.3e-24	AC121338.2	1.20031	0.382903	-1.64836	6.77e-36	5.6e-34
	CLEC6A	KIAA0319	RP11-90C4.1	CYP2F1	COX6C		CEACAM6	4.28852	7.70729	8.55725e-32	4.98258e-31	TNMD	-3.75736	1.14874	1.09541e-106	3.37071e-105		DUPD1				AC080013.1	AC008268.1									LINC02446	0.677811	1.91555	1.4988	1.52e-05	3.12e-05	PCDH10	1.16746	0.0889425	-3.71436	1.15e-06	2.67e-06
	PPY2P	RP11-354K1.2	DCT	RP11-146E23.2	ADGB		TLX1	5.83112	1.0471	8.80448e-32	5.12325e-31	PI16	-3.67825	4.28277	1.59688e-106	4.90548e-105		PLPP4				SLC6A17	SHISA6									AC080013.1	0.318987	0.719812	1.17412	1.21e-09	3.94e-09	AC008268.1	12.1767	0.753069	-4.01519	4.98e-39	7.42e-37
	C21orf91-OT1	RP11-150O12.3	SHOX	SOSTDC1	AC144450.2		HIST1H1B	5.07495	0.00606244	9.35079e-32	5.43766e-31	P2RY12	-2.52015	0.971586	1.6052e-106	4.92269e-105		SLC25A34				AC090152.1	AC007780.1									SLC6A17	0.254933	1.29983	2.35014	1.31e-20	1.38e-19	SHISA6	0.457561	0.211217	-1.11524	2.19e-17	1.62e-16
	KRT81	TMEM75	CHST9	ZNF971P	SRCIN1		CLDN9	2.76107	0.819821	9.39548e-32	5.46189e-31	ITM2A	-2.23382	4.90283	1.68141e-106	5.14772e-105		SLC22A3				FBXO32	RN7SL314P									AC090152.1	0.302436	0.905155	1.58153	2.97e-20	3.01e-19	AC007780.1	0.400778	0.107572	-1.8975	2e-33	1.14e-31
	SKA1	RP11-346C4.3	LINC01497	AP000662.4	PRRT2		CLGN	2.65382	4.34799	9.81302e-32	5.70097e-31	XPNPEP2	-2.79826	0.917924	2.07841e-106	6.35246e-105		CKAP2L				BLK	SLITRK6									FBXO32	17.0478	37.7524	1.14698	2.5e-09	7.87e-09	RN7SL314P	8.69418	0.18687	-5.53995	9.78e-32	4.33e-30
	BARX1-AS1	STMND1	HAS1	SH3TC2	RP11-616M22.3		CHST6	2.23818	1.8579	9.8506e-32	5.72097e-31	ZFP36	-2.16974	7.70172	3.91538e-106	1.18869e-104		TWIST2				MARCO	AL078645.1									BLK	0.290443	0.784901	1.43426	0.000324988	0.000561415	SLITRK6	21.9968	2.20566	-3.31801	5.69e-13	2.66e-12
	FADS6	ELK2AP	RP11-429A20.3	RP4-621N11.2	RHBDL1		DMP1	4.93248	-0.981206	1.28354e-31	7.42122e-31	RSPO3	-2.42151	2.52181	1.0247e-105	3.10576e-104		POC1A				RARRES1	ECM1									MARCO	1.88036	11.1971	2.57404	4.38e-28	1.14e-26	AL078645.1	0.225902	0.0805661	-1.48745	4.95e-15	2.88e-14
	TRIP13	C6orf222	CTD-2530H12.2	DMRT3	NPNT		TINCR	2.58798	4.1824	1.68206e-31	9.6853e-31	SMPX	-5.35475	-0.334009	1.40312e-105	4.24562e-104		TROAP				GLIPR2	PGPEP1									RARRES1	13.7001	70.4293	2.36199	3.65e-27	8.38e-26	ECM1	50.7373	10.5204	-2.26986	1.01e-18	8.61e-18
	STATH	C4orf50	LINC01854	CENPI	AC018816.3		MUC2	8.78744	5.57425	1.69624e-31	9.76388e-31	ERICH4	-2.68255	-3.56121	2.99886e-105	9.04392e-104		CKS2				EN2	GPX2									GLIPR2	9.18023	28.1904	1.6186	3.1e-32	1.51e-30	PGPEP1	5.37932	2.66014	-1.01592	6.24e-28	1.61e-26
	MAST1	SERPINC1	GABRG1	CDKN2A-AS1	RP11-93K22.6		TMEM190	2.75341	-1.89302	1.84973e-31	1.06271e-30	ADAMTS1	-2.20799	6.20336	3.12748e-105	9.41615e-104		APOB				TBX19	TTC36									EN2	0.177348	0.557007	1.65112	4.06e-05	7.89e-05	GPX2	2.62673	1.08921	-1.26999	1.92e-07	4.91e-07
	DMRTA2	OTOR	CTD-2270F17.1	LINC01558	C3orf52		AMH	2.70532	1.17223	1.87145e-31	1.07451e-30	ISM1	-2.19229	3.89306	3.17609e-105	9.54668e-104		LRRC70				AC245884.9	S100G									TBX19	0.812775	2.71474	1.73988	4.63e-29	1.37e-27	TTC36	6.31594	1.20178	-2.39383	7.97e-36	6.53e-34
	LYPD1	KRT75	SGCG	RP11-482E14.1	LINC02115		GABRQ	5.75509	2.03963	1.89205e-31	1.08566e-30	FGF2	-2.69966	4.0386	1.68506e-104	5.04824e-103		NR3C2				LINC01667	HOXD8									AC245884.9	0.224094	3.12838	3.80324	3.52e-20	3.54e-19	S100G	7.0193	0.0768696	-6.51277	1.04e-09	3.43e-09
	LINC01559	CTA-392C11.1	MYOC	ARHGEF4	RP11-65J3.15		CFAP47	3.09001	0.110162	1.99992e-31	1.14683e-30	AOC2	-2.21371	0.539058	1.93311e-104	5.78183e-103		ANGPTL7				OXER1	SLC7A4									LINC01667	0.118992	0.954994	3.00463	8.5e-26	1.64e-24	HOXD8	4.66751	1.76268	-1.40488	4.34e-19	3.85e-18
	UBE2SP2	LINC01050	C10orf90	F5	SLC16A12		LY6H	2.37324	-0.159841	2.04876e-31	1.17446e-30	IGSF10	-2.87649	3.29455	2.63957e-104	7.86888e-103		MEDAG				PRKCA	STC2									OXER1	0.724863	2.12006	1.54832	3.77e-16	2.47e-15	SLC7A4	1.72817	0.352704	-2.29272	1.93e-05	3.91e-05
	SMR3A	RP11-246K15.1	PLCXD3	APBA2	LINC01792		TAS1R3	2.16074	1.36169	2.65191e-31	1.51639e-30	CLDN11	-2.43436	3.58965	3.78589e-104	1.12125e-102		RXRG				SELL	APH1B									PRKCA	0.655673	1.45277	1.14776	4.86e-12	2.06e-11	STC2	111.828	9.79993	-3.51236	1.44e-26	3.02e-25
	SKA3	SEZ6L	SLC14A2	LINC01143	RP11-503D12.1		IL17REL	3.13859	0.0941206	3.28205e-31	1.87082e-30	AKAP6	-2.17954	2.42286	2.30355e-103	6.77812e-102		ZWINT				LINC01833	AL138999.1									SELL	6.33607	12.8709	1.02246	0.00560818	0.00812779	APH1B	5.403	2.17041	-1.31579	1.12e-33	6.62e-32
	NXPH4	RP11-27M9.1	RP11-296E23.1	ALDH1A3	SRMS		APLP1	2.6378	3.92892	3.59177e-31	2.04416e-30	KLHL13	-2.61116	3.67475	3.12672e-103	9.14101e-102		ESR2				TAF4B	BMPR1B-DT									LINC01833	0.453398	1.95088	2.10528	7.1e-15	4.05e-14	AL138999.1	0.265378	0.0932056	-1.50956	4.59e-17	3.3e-16
	NCAPH	NKX2-2	MAS1L	KRT79	POTEC		KCNH1	3.02794	1.57775	4.00253e-31	2.27152e-30	PLN	-2.42629	2.66872	6.94821e-103	2.0248e-101		DNASE1L3				RNF182	ZBTB42									TAF4B	1.35431	3.57612	1.40084	1.86e-27	4.48e-26	BMPR1B-DT	3.03134	0.0831274	-5.18849	7.77e-15	4.42e-14
	DLL3	NUPR2	TRPM1	RP1L1	PKIB		CA9	4.7979	2.71139	4.48525e-31	2.53833e-30	C10orf71	-7.35852	0.675414	1.04759e-102	3.03817e-101		TEDC2				TMEM108	AC010998.3									RNF182	0.297019	1.11918	1.91382	1.12e-09	3.69e-09	ZBTB42	10.7641	5.19996	-1.04966	5.01e-27	1.13e-25
	ACTL8	SNORA74B	ACTC1	HOXB-AS4	RP11-126H7.4		TMEM215	3.97485	-0.890562	4.97508e-31	2.81116e-30	CAPN11	-2.34219	1.05151	5.85813e-102	1.68016e-100		SPC24				ODAM	KRT222									TMEM108	0.498456	1.10628	1.15018	4.45e-08	1.22e-07	AC010998.3	2.35738	0.460145	-2.35702	4.56e-08	1.25e-07
	PLA2G2F	C1orf105	APCDD1L-AS1	DLX6-AS1	PFKFB1		NSG2	5.86549	2.46803	6.07575e-31	3.42032e-30	XIRP2	-7.18594	3.7066	6.39087e-102	1.83007e-100		ADH4				IGLV4-69	CPO									ODAM	0.206381	5.09318	4.62518	1.98e-05	3.99e-05	KRT222	0.275151	0.0393029	-2.80751	8.58e-23	1.15e-21
	ASPM	PNLIPRP2	OR2L13	LINC00545	RNASE4		CCDC187	4.68715	-1.18207	6.33511e-31	3.56522e-30	LRRC3B	-3.52405	-1.57639	7.29388e-102	2.08208e-100		HMMR				ZFP42	SLC9A3R1									IGLV4-69	27.462	96.4717	1.81267	1.1e-05	2.3e-05	CPO	0.333641	0.154751	-1.10835	3.89e-14	2.05e-13
	IGHV3-73	SERPINA9	KCNA1	GPR84	SGCG		CHRNA9	6.7225	2.87338	9.31019e-31	5.21204e-30	SYN2	-2.74877	2.09207	8.17189e-102	2.32905e-100		PLK1				C3orf58	CD300LG									ZFP42	0.138498	1.68647	3.60607	7.08e-09	2.12e-08	SLC9A3R1	187.708	69.0065	-1.44369	4.66e-28	1.21e-26
	TRIM67	RP11-674N23.4	GMNC	SLC6A17	RP4-604G5.3		HIST1H3C	3.74613	-1.79869	9.83944e-31	5.50493e-30	CSRNP3	-2.36314	2.173	8.92807e-102	2.54058e-100		RPL3L				OR7E22P	AC100823.1									C3orf58	3.57013	8.94943	1.32582	6.04e-23	8.27e-22	CD300LG	0.671307	0.305198	-1.13723	0.00220428	0.00339151
	LINC01842	LGALS9C	RP11-357D18.1	PGBD5	PCSK1		ADGRB2	2.0153	5.14032	1.27198e-30	7.09022e-30	ADH1C	-3.4204	1.69351	1.01222e-101	2.87587e-100		IGF1				TMCC2	LRGUK									OR7E22P	0.525114	1.8699	1.83226	1.13e-16	7.8e-16	AC100823.1	0.570589	0.179853	-1.66563	0.0090917	0.0127818
	LINC01287	DNAH17-AS1	CTB-60B18.18	GABBR2	CCDC189		C19orf33	2.77646	4.15071	1.76762e-30	9.79583e-30	SCN9A	-2.26725	0.637297	1.20589e-101	3.42077e-100		KIF20A				KRT17	BAIAP3									TMCC2	0.4865	3.05632	2.65128	1.15e-33	6.73e-32	LRGUK	0.518445	0.252843	-1.03595	2.24e-11	8.88e-11
	CDCA3	AC093642.1	RN7SL417P	AL109761.5	RHOH		IGFALS	2.87544	2.17697	2.14921e-30	1.18779e-29	PAK3	-2.55871	2.10779	1.32491e-101	3.75253e-100		CENPF				XK	LINC02381									KRT17	40.6227	192.288	2.24291	4.88e-17	3.5e-16	BAIAP3	4.2831	0.71861	-2.57537	1.62e-27	3.95e-26
	CT45A10	HIST2H3D	CLDN8	S100A2	TPRG1-AS2		CD177	4.93662	3.24766	2.48193e-30	1.36875e-29	RBP7	-2.20464	3.93886	2.48804e-101	6.9923e-100		BUB1				FOXCUT	KIAA1211L									XK	0.457654	1.02933	1.16938	1.23e-11	5e-11	LINC02381	9.37901	4.08402	-1.19945	8.06e-25	1.37e-23
	CNIH2	BCAR4	SCGB1A1	RCOR2	SNX19P1		FGFR3	2.39478	4.98647	2.93238e-30	1.61179e-29	CREB5	-2.05134	3.2229	3.95757e-101	1.11051e-99		C8orf88				RAD54L	AC010203.2									FOXCUT	0.595252	9.99663	4.06987	7.43e-42	2.25e-39	KIAA1211L	5.30403	2.47967	-1.09694	7.77e-28	1.97e-26
	RSU1P3	RP11-127O4.3	OR10A3	CTD-2600O9.1	NRIP3		2020-03-10	2.60022	-0.430379	2.99189e-30	1.644e-29	CSRP3	-7.14337	1.80881	4.47947e-101	1.25501e-99		CEP55				FCRL1	AC015727.1									RAD54L	1.93366	4.91236	1.34508	7.92e-26	1.53e-24	AC010203.2	0.787893	0.287419	-1.45485	4.22e-26	8.47e-25
	RP11-190J1.3	MSLN	NPY2R	CTD-3010D24.3	CISD3		ENTPD8	2.70064	2.05924	3.9219e-30	2.14658e-29	GLP2R	-3.37015	-0.645701	1.08363e-100	3.01738e-99		CPM				KRT16P6	CORO6									FCRL1	0.261546	0.610014	1.22178	1.08e-05	2.25e-05	AC015727.1	0.297856	0.129803	-1.19829	1.35e-09	4.4e-09
	C10orf91	SLC8A2	RP11-459D22.1	RP11-46B11.2	DNAI1		RCOR2	2.35971	2.69247	4.16421e-30	2.27852e-29	MFAP4	-2.4708	6.31379	1.36473e-100	3.78848e-99		CDKN3				IGLJ1	TOX3									KRT16P6	0.0622868	1.20726	4.27667	1.01e-09	3.33e-09	CORO6	3.33932	0.417997	-2.99799	3.95e-12	1.69e-11
	KCNJ4	LRG1	KIF18BP1	FOXCUT	C9orf172		HIST1H1T	3.5377	-2.90874	4.53845e-30	2.48179e-29	RHOXF1	-2.53319	-2.15151	5.70442e-100	1.55735e-98		MYADML2				GSTA1	TRIM58									IGLJ1	0.287176	0.686631	1.2576	9e-05	0.000167528	TOX3	6.99802	1.91561	-1.86914	3.12e-24	4.97e-23
	CTD-2377D24.4	DRC7	AC226118.1	KRT77	RP11-166N6.3		MS4A15	4.18244	1.96458	4.55484e-30	2.49001e-29	SCN3A	-2.8311	0.76382	2.80618e-99	7.60391e-98		SLC36A2				KCNJ2	CORO2A									GSTA1	1.85761	9.00142	2.27671	4.48e-14	2.36e-13	TRIM58	1.27163	0.510185	-1.31759	7.77e-15	4.41e-14
	OTX2	LINC02201	SLC27A6	OSR1	C1orf220		CELF3	4.53506	-0.059893	4.98671e-30	2.71955e-29	AC083902.2	-4.79767	-0.267973	3.83321e-99	1.03405e-97		INHBA				CCNB2	CNTNAP2									KCNJ2	0.942269	1.91542	1.02345	0.0377974	0.0482895	CORO2A	11.4764	5.69258	-1.01151	6.09e-22	7.42e-21
	INA	AF178030.2	MOGAT1	ACRV1	RP11-431J24.2		HOXB9	2.63877	1.42457	5.11295e-30	2.78588e-29	IL33	-2.70541	4.2606	4.78703e-99	1.28753e-97		LMO7DN				IGHG1	PWAR5									CCNB2	7.89671	18.5436	1.2316	2.19e-25	3.98e-24	CNTNAP2	4.56117	1.55477	-1.5527	2.81e-11	1.1e-10
	SLC7A5	RN7SL521P	CYP1A2	PLK1	GRAMD4P1		HHIPL2	3.2325	1.72412	6.60345e-30	3.58402e-29	USP44	-2.26534	-0.468185	1.69755e-98	4.51892e-97		CCDC141				IGKV6D-21	PRND									IGHG1	481.643	1453.37	1.59337	3.25e-11	1.26e-10	PWAR5	0.467785	0.194344	-1.26723	3.4e-09	1.05e-08
	CT83	KRT1	LINC00670	SLC26A9	SYT1		INSM1	5.33161	2.92426	7.08643e-30	3.83928e-29	RYR3	-2.28886	1.5872	2.3945e-98	6.34629e-97		KIFC1				ULBP2	CISD3									IGKV6D-21	1.5507	13.9736	3.17172	0.0102016	0.0142172	PRND	1.09131	0.448787	-1.28195	3.95e-11	1.52e-10
	AC010729.1	CTD-2033D15.3	AC105398.3	ACP7	RP3-414A15.12		MNX1	3.18964	0.863936	8.05625e-30	4.35301e-29	TGFBR3	-2.45714	6.25988	3.79878e-98	1.00389e-96		PBK				STIL	FMO5									ULBP2	0.810171	2.24379	1.46964	1.34e-17	1.01e-16	CISD3	19.9445	9.90853	-1.00925	1.42e-17	1.08e-16
	SLC15A1	MGAT5B	KCNA4	TLX1	SYTL5		BRSK2	2.88147	1.47617	9.06826e-30	4.88819e-29	HOXA5	-2.36059	2.21725	4.34846e-98	1.14581e-96		TNMD				MTMR8	LINC02568									STIL	2.17897	4.61265	1.08195	2.48e-19	2.26e-18	FMO5	4.34712	1.80699	-1.26647	7.69e-23	1.04e-21
	UTS2	GATA4	AP001628.7	SOX11	TLE6		HIST1H3G	3.03862	0.609672	9.1175e-30	4.91328e-29	HSPB2-C11orf52	-2.90436	-4.19855	9.3911e-98	2.46381e-96		PI16				COL27A1	ADCY9									MTMR8	0.183037	0.377025	1.04252	2.47e-18	2.01e-17	LINC02568	7.27622	0.763624	-3.25226	3.28e-41	8.27e-39
	STIL	SLC1A1	CHRND	SRD5A2	KLF2P3		CCDC151	2.18043	0.958068	9.90059e-30	5.32894e-29	HCAR3	-2.18326	-1.00755	1.3031e-97	3.41382e-96		P2RY12				AC135068.2	RGS5									COL27A1	1.82523	4.85961	1.41276	5.51e-14	2.88e-13	ADCY9	5.99552	2.39993	-1.32089	4.9e-32	2.3e-30
	LHX3	TUBA4B	RP11-321A17.4	MOXD1	HSD3B2		FAM196A	3.71745	3.82765	1.21952e-29	6.55039e-29	NMRK2	-4.96721	-1.9504	1.45369e-97	3.79192e-96		ITM2A				SPX	SCGN									AC135068.2	0.516465	2.04456	1.98505	2.96e-06	6.59e-06	RGS5	28.1949	6.18888	-2.18768	9.66e-37	9.46e-35
	DMBT1	RXFP3	TF	LINC00460	HAR1A		EMX1	3.59983	1.39076	1.22852e-29	6.59682e-29	CNTNAP3B	-2.74399	0.0579354	1.51207e-97	3.93289e-96		XPNPEP2				PITPNM3	AL603750.1									SPX	0.240884	0.635725	1.40007	8.64e-10	2.87e-09	SCGN	2.48258	0.807915	-1.61956	4.25e-08	1.17e-07
	GINS4	RP11-379K22.3	PHEX-AS1	PCBP3	SLC4A10		TERT	2.78311	-0.886705	1.24089e-29	6.66128e-29	FNDC5	-2.31251	1.50119	2.13466e-97	5.54431e-96		ZFP36				BARX2	LINC02433									PITPNM3	0.588951	1.21311	1.0425	7.1e-13	3.28e-12	AL603750.1	4.42349	2.0695	-1.0959	4.3e-18	3.42e-17
	STRA8	RP1-35C21.2	KLHL30-AS1	CHIAP1	NELL2		CST6	2.64242	2.04556	1.3726e-29	7.35961e-29	EGR2	-2.19443	4.87687	2.37208e-97	6.15216e-96		RSPO3				AL157373.2	MT1A									BARX2	6.3758	16.2559	1.35029	1.22e-09	3.98e-09	LINC02433	0.399224	0.0379877	-3.39359	0.0164018	0.0221502
	SERPINB4	GPR158	LINC01152	RP11-180I4.2	RP11-16O13.1		TMEM151A	3.73741	-0.971295	1.38001e-29	7.39493e-29	ODF3L1	-2.26605	-1.15691	5.6982e-97	1.46739e-95		SMPX				SLC27A6	AC010326.3									AL157373.2	0.198911	0.595717	1.58251	3.36e-18	2.7e-17	MT1A	4.30546	1.27446	-1.75628	1.05e-07	2.77e-07
	AC008060.7	GPR26	RP11-66B24.1	PTCH1	NME3		HIST1H1D	3.6079	0.558804	1.61012e-29	8.61785e-29	PDE11A	-2.43132	1.79735	6.83551e-97	1.75529e-95		COL11A1				GRHL1	AC124312.4									SLC27A6	0.755607	2.07855	1.45987	3.04e-06	6.75e-06	AC010326.3	11.6375	4.43451	-1.39194	9.04e-29	2.58e-27
	LINC01518	RP3-453C12.15	AC093390.1	UBD	KIAA1257		PNCK	2.59216	1.3725	1.75496e-29	9.3765e-29	CX3CL1	-2.37584	6.64067	1.47051e-96	3.76545e-95		ERICH4				RNF175	PARD6B									GRHL1	5.17517	10.6266	1.03801	3.75e-16	2.46e-15	AC124312.4	0.356868	0.172456	-1.04916	1.41e-05	2.9e-05
	RP11-180C1.1	S100A8	LHCGR	DNMT3B	MFSD7		CLPSL1	3.02208	1.46294	1.98082e-29	1.05614e-28	GLRA4	-3.25623	-2.31509	1.95073e-96	4.98107e-95		ADAMTS1				CASC8	GLOD5									RNF175	0.245993	0.534698	1.12011	2.89e-11	1.13e-10	PARD6B	15.4922	2.82139	-2.45706	5.54e-29	1.61e-27
	KRT18P54	ALG1L	RP11-415C15.3	NRN1	GDPD3		HIST1H2BG	2.38029	2.72472	2.46234e-29	1.30751e-28	KLHL30	-2.7457	0.170257	1.66494e-95	4.19819e-94		ISM1				HORMAD1	NUDT12									CASC8	0.213849	2.59221	3.59952	1.54e-38	2.1e-36	GLOD5	0.664331	0.273071	-1.28263	1.25e-15	7.77e-15
	TBR1	FAM83A	SLCO1A2	KIF18A	MYRIP		MSLNL	4.04875	-1.27147	2.56881e-29	1.36325e-28	MRGPRF	-2.00996	2.83336	3.93735e-95	9.87329e-94		PTTG1				HSPB2	RANBP3L									HORMAD1	0.30792	7.06758	4.52059	1.61e-23	2.36e-22	NUDT12	6.57097	2.14326	-1.6163	5.57e-41	1.34e-38
	ERVWE2	SBSN	CCL24	MAGEB4	CERS4		SIM2	2.2405	3.25476	2.57359e-29	1.36499e-28	FOS	-2.53651	8.50365	5.09617e-95	1.27439e-93		FGF2				DLX5	BBOF1									HSPB2	0.625152	1.63486	1.38689	0.00048064	0.000811421	RANBP3L	1.65962	0.7297	-1.18547	2.99e-17	2.19e-16
	C7orf77	RP11-149I2.4	ANKRD1	FAM72A	RP11-669E14.4		SCX	2.05939	0.364394	2.71499e-29	1.43704e-28	MEOX1	-2.66679	3.01982	6.10801e-95	1.52323e-93		AOC2				ADGRG6	AC012467.1									DLX5	0.907349	3.91374	2.10882	6.05e-10	2.05e-09	BBOF1	4.28565	1.59804	-1.42321	2.66e-37	2.86e-35
	SMC1B	SRGAP3-AS2	KCNJ16	AC004461.4	LINC02054		IGF2BP1	3.71512	-0.102853	3.4213e-29	1.80511e-28	FAM110D	-2.05887	1.49321	1.453e-94	3.6136e-93		WISP1				AC026803.1	NOSTRIN									ADGRG6	1.94525	4.0279	1.05008	2.12e-20	2.21e-19	AC012467.1	1.57497	0.372458	-2.08018	4.82e-25	8.42e-24
	PRB1	RP3-340N1.2	PDZRN3-AS1	CENPE	POTEJ		NKX6-1	2.78124	1.19131	3.58371e-29	1.8886e-28	ABCB1	-2.03811	2.62897	1.88676e-94	4.68593e-93		IGSF10				NCCRP1	TGFB3									AC026803.1	0.185417	0.371205	1.00144	3.81e-07	9.42e-07	NOSTRIN	6.393	1.57746	-2.01889	6.24e-33	3.31e-31
	LINC00461	SCARNA12	RP11-235G24.1	ORC6	AMZ1		GNG3	2.84409	-0.319512	4.06228e-29	2.13523e-28	SAA2-SAA4	-3.65911	2.12135	2.05283e-94	5.08447e-93		PYCR1				AC099329.2	GFRA1									NCCRP1	4.09477	24.7465	2.59537	4.98e-27	1.12e-25	TGFB3	19.0549	7.02124	-1.44037	7.4e-32	3.39e-30
	AC004158.3	KRT8P30	RP11-167B3.2	RHOXF1-AS1	MISP3		AOC1	3.52545	2.00657	4.97993e-29	2.61151e-28	ASB15	-4.22642	-1.474	2.19901e-94	5.4317e-93		DLGAP5				IGKV3D-15	SPEF1									AC099329.2	0.197242	0.621054	1.65475	0.0020121	0.00311679	GFRA1	48.8269	2.58005	-4.24221	8.94e-38	1.03e-35
	AUNIP	MUC5B	RP11-627G23.1	ZIC1	RP11-345J13.1		DLX4	2.0736	0.975236	5.91251e-29	3.08808e-28	VIT	-2.76932	2.59756	6.54824e-94	1.60436e-92		CLDN11				DLGAP5	CBLN4									IGKV3D-15	2.88159	8.34833	1.53462	6.61e-05	0.000125222	SPEF1	1.90291	0.294745	-2.69067	1.11e-36	1.06e-34
	LINC01096	TACC1P1	PPBP	TINAGL1	TMEM145		HIST3H2A	2.04419	4.14303	7.13196e-29	3.71644e-28	SAA1	-3.30339	6.64604	2.03833e-93	4.97392e-92		NEIL3				GMDS	CAMK2B									DLGAP5	4.48965	9.14819	1.02688	6.29e-22	7.65e-21	CBLN4	0.39772	0.143282	-1.47289	1.28e-20	1.36e-19
	NPBWR1	NPHS1	RP11-445O3.1	GPC2	RP11-532F6.4		LKAAEAR1	2.8324	-2.49633	7.31609e-29	3.8113e-28	PAPPA2	-2.66681	0.349816	2.85884e-93	6.96674e-92		BUB1B				SLC6A16	NME5									GMDS	7.09064	14.5268	1.03473	1.38e-24	2.28e-23	CAMK2B	1.24654	0.317861	-1.97147	4.47e-11	1.71e-10
	UNC93A	INA	FEZF2	ANKRD33B	CREB3L1		KCNE4	2.62848	6.29276	7.91651e-29	4.11817e-28	SCN2B	-2.84018	0.728708	5.86727e-93	1.41838e-91		AKAP6				C11orf86	SERPINA5									SLC6A16	0.458314	1.00528	1.13318	4.13e-15	2.42e-14	NME5	2.73646	0.649856	-2.07412	1.05e-23	1.57e-22
	MAGEA6	POTEC	CTD-2147F2.2	IRX1	PPM1J		HIST1H4C	4.49395	-0.451978	7.94276e-29	4.13064e-28	ASB12	-2.70957	-2.00926	6.04243e-93	1.45878e-91		BICDL1				GABRE	SPATA18									C11orf86	0.0881526	1.99051	4.49699	8.06e-34	4.91e-32	SERPINA5	23.2797	5.01569	-2.21455	1.47e-22	1.92e-21
	AQP12B	BFSP2	MS4A6E	KIF18B	RP11-314P15.2		FUT7	2.03107	-0.406735	8.00408e-29	4.16134e-28	ITLN1	-3.96195	-2.35468	8.84763e-93	2.12472e-91		AURKA				NCR3	GRIN1									GABRE	0.718749	2.86813	1.99655	3.91e-21	4.36e-20	SPATA18	2.71571	1.23029	-1.14234	1.48e-09	4.78e-09
	DLX5	LINC01297	SLCO1B7	DLX6	TCEA1P3		HIST1H3F	4.67288	-1.23872	8.48245e-29	4.39997e-28	AKR1C3	-2.32118	4.67399	4.08536e-92	9.75916e-91		KLHL13				GRAMD2A	AC007743.1									NCR3	0.446407	0.99401	1.1549	4.25e-07	1.04e-06	GRIN1	0.503918	0.24047	-1.06733	1.39e-10	5.03e-10
	RAD54L	RP11-379K22.2	RP11-569G13.3	DEPDC1B	REEP1		PRAC2	5.92834	-1.3086	1.07555e-28	5.55682e-28	HPSE2	-3.19644	0.953135	2.28698e-91	5.42039e-90		PLN				AC121757.1	WNK4									GRAMD2A	2.06678	4.49681	1.12152	4.71e-10	1.62e-09	AC007743.1	0.572735	0.263318	-1.12106	0.00132375	0.00209946
	OR7E161P	NKAIN4	RP11-545J16.1	ANTXRL	ASB15		SLC16A6	2.43543	5.34273	1.28735e-28	6.62842e-28	UTS2B	-2.22423	-1.90865	5.50533e-91	1.29636e-89		C10orf71				FOXI3	LINC02303									AC121757.1	0.479088	1.48575	1.63282	1.72e-20	1.8e-19	WNK4	8.74555	1.06096	-3.04318	9.32e-31	3.44e-29
	SIX3-AS1	IL17C	CACNG2	RP11-654E17.2	LINC00870		CASP14	6.74766	5.34201	1.29773e-28	6.68e-28	URAD	-4.01289	-3.60246	1.71483e-90	4.00163e-89		MELK				FAM3D	FGD3									FOXI3	0.199775	0.764402	1.93596	3.13e-06	6.93e-06	LINC02303	1.31342	0.34667	-1.92169	6.21e-06	1.34e-05
	CYP2W1	VMO1	SULT1C3	MOGAT1	RP11-349I1.2		HIST1H2BM	5.12032	-2.37483	1.38006e-28	7.09371e-28	CLDN19	-3.49117	0.603744	2.21416e-90	5.14042e-89		NUAK2				AL355312.3	AC114296.1									FAM3D	0.803586	12.8232	3.99617	2.93e-18	2.36e-17	FGD3	12.5321	3.10579	-2.0126	5.41e-23	7.44e-22
	ZP4	FNDC1-IT1	RP11-115H13.1	PRKCQ	CMYA5		SIX2	2.36737	3.22189	1.8155e-28	9.30296e-28	CMA1	-2.92912	0.0633601	1.73077e-89	3.95744e-88		KIF18B				LINC01781	DPY19L2P4									AL355312.3	0.361343	1.0224	1.50052	6.09e-12	2.55e-11	AC114296.1	2.1067	0.389792	-2.43421	2.95e-15	1.76e-14
	KIF18A	RP11-493L12.5	RP5-1119A7.17	NCAPH	RP11-349A8.3		LCN1	3.01175	-3.53476	2.34522e-28	1.19734e-27	DUSP27	-2.94729	-0.167135	2.07747e-89	4.74422e-88		CAPN11				EIPR1-IT1	LRRC26									LINC01781	0.227824	0.628359	1.46367	2.09e-08	5.92e-08	DPY19L2P4	1.13274	0.0823282	-3.78229	1.32e-18	1.1e-17
	RP11-62I21.1	ZP4	MYLPF	VLDLR	MIR2052HG		MMP3	2.3034	3.89563	2.6062e-28	1.32909e-27	DUSP26	-3.35143	-0.255347	4.81357e-89	1.08966e-87		XIRP2				FANCE	NLRP5									EIPR1-IT1	0.273117	0.634621	1.21638	2.47e-11	9.74e-11	LRRC26	4.45216	1.30872	-1.76635	2.25e-17	1.67e-16
	FER1L6-AS2	KRT2	ACTN3	LINC01501	RP1-202O8.2		KRT37	3.29385	-1.44294	2.80366e-28	1.42738e-27	ASB10	-5.90766	-3.20699	6.4266e-89	1.45299e-87		LRRC3B				AL049555.1	HOXB-AS3									FANCE	2.59352	5.75784	1.15062	2.83e-25	5.06e-24	NLRP5	0.359856	0.0526429	-2.77311	1.46e-05	3.01e-05
	KIF15	TEX14	KLHL41	RP11-34A14.3	C11orf88		GDF15	2.41495	4.47411	3.0352e-28	1.54224e-27	TRIM54	-3.52298	-0.442743	1.40321e-88	3.15288e-87		SYN2				IGHV1OR21-1	BMP4									AL049555.1	2.84343	6.53638	1.20086	9.85e-19	8.41e-18	HOXB-AS3	2.08997	0.596762	-1.80826	5.96e-09	1.8e-08
	RP11-135A1.3	HIST2H2AA3	ATP2A1	RP11-44K6.2	RLN2		KISS1	2.71093	-1.52335	3.19449e-28	1.6209e-27	TMC2	-2.33075	-1.46799	1.73838e-88	3.89633e-87		CSRNP3				GJB6	TESMIN									IGHV1OR21-1	0.424259	1.0875	1.35801	5.23e-06	1.13e-05	BMP4	5.24404	1.45509	-1.84957	2.53e-23	3.63e-22
	LINC01475	RP11-222G7.2	TNNC1	IQGAP3	CITF22-24E5.1		TSPAN1	2.46927	6.63468	3.24799e-28	1.64667e-27	AC007906.2	-2.76978	1.6727	1.76168e-88	3.94368e-87		ADH1C				SLC34A2	UNC5A									GJB6	0.514698	2.59064	2.33151	1.95e-20	2.04e-19	TESMIN	7.46368	3.22347	-1.21127	1.09e-20	1.17e-19
	CTA-384D8.34	CTD-2535I10.1	NEB	FAM124A	LINC01906		FSIP1	2.68724	4.17682	4.09781e-28	2.07057e-27	PPP1R3A	-7.90714	-0.261777	2.78866e-87	6.15165e-86		SCN9A				LY6E-DT	VN1R48P									SLC34A2	6.09305	27.5783	2.1783	3.31e-20	3.34e-19	UNC5A	2.15458	0.569883	-1.91867	3.18e-16	2.11e-15
	RP11-382F24.1	GABRA3	MYL3	CXCL3	RP11-680B3.2		CFAP99	2.0145	-0.354779	4.38921e-28	2.21473e-27	SCN11A	-2.09343	-0.38287	9.82544e-87	2.15436e-85		PAK3				MGAT3	C5orf38									LY6E-DT	0.497253	1.29114	1.3766	1.76e-10	6.32e-10	VN1R48P	0.313678	0.0180686	-4.11773	2.84e-33	1.58e-31
	RP11-962G15.1	PGLYRP4	MYOT	RP11-20G13.1	EME2		KCNK9	3.07158	-1.24869	4.72381e-28	2.38092e-27	OVCH2	-3.21935	-0.754158	7.08766e-86	1.53919e-84		RBP7				PPARGC1A	EGR3									MGAT3	0.821739	2.47901	1.59301	3.72e-10	1.29e-09	C5orf38	11.9881	4.89064	-1.29351	0.03201	0.0413439
	DKK1	LINC00052	LDB3	CMTM5	CACNG4		F7	2.8172	3.07146	4.77579e-28	2.40512e-27	NWD2	-3.61243	-0.663972	7.85618e-86	1.70405e-84		CREB5				AKR1E2	AC016825.1									PPARGC1A	0.18474	0.956422	2.37215	2.07e-08	5.87e-08	EGR3	7.27145	2.84881	-1.35188	1.51e-11	6.1e-11
	RP11-84N19.1	ASCL1	TNNI1	NOL4	C4B		TYRP1	4.12761	1.17506	4.81297e-28	2.42183e-27	TMEM178A	-2.12495	1.43092	2.02308e-85	4.37249e-84		CSRP3				IGHD3-9	VTN									AKR1E2	0.791062	2.97948	1.9132	5.76e-33	3.06e-31	AC016825.1	0.401092	0.0115106	-5.12289	2.73e-23	3.89e-22
	HJURP	NIPAL4	KCNIP2	RP11-481F24.3	RP11-390P24.1		PVALB	4.9956	3.84664	5.36085e-28	2.69527e-27	DSC1	-2.61756	-0.275969	4.5939e-85	9.85843e-84		LMNB1				ACADL	DUSP4									IGHD3-9	1.27229	3.85212	1.59822	7.8e-05	0.000146308	VTN	0.613184	0.180067	-1.76779	6.35e-05	0.00012045
	RP11-13P5.2	RP11-734K21.5	HSD17B13	TRIM10	CCND1		EPO	3.92278	0.0697488	5.3679e-28	2.69807e-27	RASSF9	-2.02338	2.12504	2.63774e-84	5.60752e-83		GLP2R				IGLV3-25	RND1									ACADL	0.231365	0.805147	1.79909	0.00206596	0.00319443	DUSP4	33.1597	10.8983	-1.60533	3.7e-20	3.71e-19
	OR1F1	AC009236.2	HSPB7	TRIM29	CBLN4		CYP21A2	2.32586	1.63047	5.51053e-28	2.76746e-27	KCNE1	-2.4646	-1.29687	5.26027e-84	1.11306e-82		MFAP4				SLC26A7	AGTR1									IGLV3-25	98.0277	226.467	1.20804	7.29e-07	1.74e-06	RND1	7.95803	3.7314	-1.09269	2.58e-25	4.63e-24
	MKRN3	ZAN	LVRN	TMEM171	NKAIN1		OPRD1	2.8301	1.70332	6.34721e-28	3.18061e-27	PPP1R14A	-2.31574	2.40061	7.28443e-84	1.53421e-82		RRM2				LBR	MS4A14									SLC26A7	0.216844	0.764063	1.81703	1.47e-10	5.34e-10	AGTR1	10.5164	0.352962	-4.89698	2.74e-28	7.34e-27
	RPTN	RP11-312A15.2	LYVE1	GJB3	PCAT18		FCRLB	3.19348	2.95047	6.77509e-28	3.39315e-27	GPR182	-2.31887	-1.71475	8.7019e-84	1.83063e-82		GABRD				SVOPL	CPLX2									LBR	7.36842	16.3283	1.14795	8.16e-32	3.69e-30	MS4A14	1.94455	0.451202	-2.10759	8.91e-15	5.03e-14
	DSCR4	EIF4E1B	VEGFD	RP11-439A17.9	LINC01022		KCNJ3	5.21345	5.83931	9.201e-28	4.57906e-27	WDR86	-2.05261	2.065	1.84298e-83	3.85032e-82		PAQR4				KIFC3	THBS4									SVOPL	0.171297	0.405433	1.24297	1.03e-13	5.2e-13	CPLX2	1.26012	0.00692676	-7.50716	8.51e-05	0.000158928
	RP11-317N12.1	RP11-281P11.1	MYOM1	FAM72D	RP11-730G20.1		ZBED2	2.5568	0.322485	9.24562e-28	4.60001e-27	TECRL	-7.16996	-2.4844	2.49908e-83	5.21503e-82		KIF2C				AURKB	TNRC18P1									KIFC3	1.75572	3.59043	1.03209	8.16e-18	6.34e-17	THBS4	16.1331	4.60152	-1.80984	3.93e-17	2.85e-16
	LINC01925	RP11-265N7.2	LIPE	MET	MATN3		DIO1	3.52729	3.61875	9.38667e-28	4.66762e-27	GRIA4	-3.32246	1.40399	3.70006e-83	7.7035e-82		KIF11				COL22A1	ARMT1									AURKB	5.09597	14.771	1.53534	5.75e-29	1.67e-27	TNRC18P1	4.95463	0.238041	-4.3795	4.77e-40	9.12e-38
	OFCC1	CTA-384D8.31	GPAM	LINC00165	KRT89P		CACNG4	2.38106	6.52566	1.09424e-27	5.42935e-27	TACR1	-2.58012	2.28383	2.70229e-82	5.55607e-81		RHOXF1				AL355870.1	CBFA2T3									COL22A1	0.666682	3.02546	2.18209	2.2e-07	5.58e-07	ARMT1	53.8577	8.44524	-2.67294	4.87e-45	2.9e-42
	FAM83D	CTD-2620I22.3	RDH5	ZNF670-ZNF695	RP11-281J9.2		ORM1	5.93947	3.2376	1.12935e-27	5.60047e-27	ZBTB16	-3.02004	2.69697	3.56722e-82	7.31783e-81		EXO1				STAC2	AC069120.1									AL355870.1	0.225151	0.684624	1.60442	3.33e-07	8.29e-07	CBFA2T3	2.66895	1.08281	-1.3015	4.29e-12	1.83e-11
	PSORS1C2	RP3-443C4.2	BTNL9	ODAM	SLC26A3		FABP6	4.32123	0.0613576	1.33965e-27	6.62348e-27	PAK5	-3.20675	-0.16539	5.51585e-82	1.12644e-80		CDCA8				S100A5	AC007255.1									STAC2	10.1536	43.5494	2.10067	1.25e-21	1.48e-20	AC069120.1	4.19585	0.753376	-2.47752	7.02e-14	3.62e-13
	MSLN	KRT3	CLEC3B	RP11-10A14.5	AC008088.4		LAG3	2.00867	2.58271	1.52561e-27	7.52442e-27	ANKRD29	-2.1786	2.83494	8.22503e-82	1.67218e-80		KIF23				AC097658.1	FOXA1									S100A5	0.181457	0.437089	1.2683	5.64e-05	0.000107765	AC007255.1	1.46669	0.230241	-2.67135	1.34e-41	3.65e-39
	RP3-407E4.4	ZIC2	CRHBP	NPR3	GCM1		MMP10	3.10511	2.40439	1.7975e-27	8.82705e-27	CRYAB	-2.79665	6.99032	1.2507e-81	2.52856e-80		SCN3A				PLAC8	SEMA3B									AC097658.1	0.48467	1.02792	1.08466	0.0192012	0.0256473	FOXA1	93.8023	13.8283	-2.762	2.43e-48	3.98e-45
	DUSP5P2	LIN28A	KLHL31	TLX1NB	LRRC6		RUFY4	2.38793	0.419161	1.80895e-27	8.8785e-27	SERTM1	-3.62518	-2.4642	2.69172e-81	5.41775e-80		SGO1				GJB3	FGFR3									PLAC8	0.572818	1.43642	1.32633	5.35e-09	1.63e-08	SEMA3B	7.1656	2.13279	-1.74834	3.7e-22	4.6e-21
	CT45A1	RP11-431J17.1	RP11-736K20.4	DRAXIN	KCNF1		ADAMTS20	4.30558	-1.87631	1.85643e-27	9.10905e-27	ACADL	-3.32444	1.15582	3.17665e-81	6.38671e-80		AC083902.2				CSPG4	PROB1									GJB3	0.854808	5.6202	2.71695	1.58e-29	4.92e-28	FGFR3	7.88614	3.74915	-1.07276	2.92e-09	9.13e-09
	SLC9A3P2	IGHEP1	RP11-175K6.2	IGLV3-12	KRT8P2		HOXB13	5.6951	2.46598	2.50311e-27	1.2226e-26	MYOM2	-3.27614	3.13899	8.22466e-81	1.64811e-79		ERCC6L				MIR499A	RBM24									CSPG4	3.46959	9.13015	1.39587	0.000405444	0.000691476	PROB1	1.50082	0.678876	-1.14453	4.85e-21	5.36e-20
	CAMKV	RP11-10A14.5	CAV1	TAF7L	RP11-347C12.11		IFNL2	4.28546	-3.28754	2.67084e-27	1.30277e-26	VIP	-2.03586	-2.27985	2.75977e-80	5.46983e-79		IL33				S100B	KCNK15									MIR499A	0.215311	0.475239	1.14223	7.42e-06	1.58e-05	RBM24	4.92085	0.345785	-3.83096	6.24e-20	6.09e-19
	HOXB9	ROBO2	EBF1	PRB2	SCARNA6		FGF5	3.85406	-1.57539	2.72735e-27	1.32926e-26	SOD3	-2.29677	4.71937	3.56987e-80	7.06002e-79		TACC3				PICSAR	TBILA									S100B	3.15299	25.7343	3.0289	9.52e-23	1.27e-21	KCNK15	7.81664	0.848514	-3.20354	4.65e-39	7.09e-37
	RP11-10A14.5	RP13-455A7.1	SIK2	ARHGEF26-AS1	MYB-AS1		TIGIT	2.05973	2.84602	2.92635e-27	1.42396e-26	COL25A1	-2.48732	0.419958	1.43425e-79	2.81501e-78		TK1				AP000851.1	CYP4F12									PICSAR	0.407057	3.61338	3.15004	5.69e-34	3.6e-32	TBILA	1.4911	0.413399	-1.85077	6.34e-23	8.66e-22
	ZBED2	C16orf92	CA3	SPHKAP	STARD3		RGS8	2.38289	-1.18902	2.97731e-27	1.44798e-26	JPH2	-2.38134	3.05232	2.29289e-79	4.49054e-78		ASPM				AC103563.1	CYP21A2									AP000851.1	0.545434	11.2129	4.36161	9.56e-22	1.14e-20	CYP4F12	0.457075	0.192055	-1.25091	8.86e-11	3.28e-10
	RP3-340N1.2	SNTN	PPP1R27	DSCR9	C4A		TNR	2.89627	0.690096	3.07289e-27	1.49326e-26	GDF10	-3.04567	1.65195	8.05642e-79	1.56768e-77		USP44				LMO7-AS1	TENM2									AC103563.1	0.670558	1.59862	1.2534	6.79e-06	1.45e-05	CYP21A2	1.36816	0.372439	-1.87716	1.63e-24	2.68e-23
	LINC00518	LRRIQ4	PDE2A	MURC	DUSP13		IFNL3	4.06694	-3.25927	3.13584e-27	1.52263e-26	KCNB1	-2.81978	2.74787	8.343e-79	1.6217e-77		NDC80				NRG2	AC120498.6									LMO7-AS1	0.863892	1.85282	1.1008	1.4e-09	4.55e-09	TENM2	0.572412	0.246174	-1.21738	7.61e-10	2.55e-09
	RP4-681L3.2	SHISA9	CKMT2	RAET1L	RP11-312A15.3		GJA3	2.25729	-1.37137	3.3358e-27	1.61799e-26	FAM107A	-2.61691	3.96674	8.66533e-79	1.68076e-77		RYR3				IGLV8-61	AC008771.1									NRG2	0.286855	0.899045	1.64807	2.45e-19	2.24e-18	AC120498.6	0.632033	0.0258535	-4.61157	3.04e-13	1.47e-12
	RP11-44K6.4	RP11-53O19.2	SYNE3	SGO1	CERS6		EPHA8	3.66204	0.401827	3.38125e-27	1.6396e-26	KCNA2	-2.74505	-1.68579	5.27717e-78	1.00956e-76		TGFBR3				FMO2	SRARP									IGLV8-61	24.1334	127.447	2.40079	0.000344681	0.000592988	AC008771.1	11.1161	4.67283	-1.25029	4.55e-37	4.69e-35
	RP11-357H14.17	RP11-326N17.2	ABCD2	OR2I1P	RP5-1007F24.1		MIOX	2.19173	-2.19553	3.44619e-27	1.66975e-26	RBFOX1	-3.80908	-1.69445	1.04205e-76	1.9564e-75		KNL1				PRSS3	RNVU1-1									FMO2	2.62674	8.03075	1.61226	4.18e-08	1.15e-07	SRARP	9.59447	0.251088	-5.25594	2.59e-46	2.32e-43
	RP11-774D14.1	CLEC3A	SLC16A7	DEPDC7	ACACB		SLC30A8	5.87471	5.96253	3.5319e-27	1.71037e-26	KCNE1B	-2.9903	-2.4309	1.39747e-76	2.61827e-75		HOXA5				ZNF462	MIR10B									PRSS3	0.132767	1.29173	3.28234	2.54e-25	4.57e-24	RNVU1-1	0.805355	0.326509	-1.3025	0.000631453	0.00104803
	LINC01446	RN7SL396P	NAALAD2	VAX1	SCG2		RIMS4	3.34977	4.94435	4.18285e-27	2.02021e-26	FAM47E-STBD1	-2.15544	-2.39165	1.61619e-76	3.02495e-75		SKA3				LRAT	CAMK2N1									ZNF462	1.29395	3.67723	1.50683	9.1e-28	2.3e-26	MIR10B	0.459807	0.139696	-1.71874	2.35e-09	7.42e-09
	RP11-881M11.8	AC010729.1	MYH2	AURKB	S100G		BPIFB1	4.00875	5.51899	4.53368e-27	2.18616e-26	TMTC1	-2.19438	5.26138	1.92412e-76	3.59757e-75		NCAPG				CHRM3	NNAT									LRAT	0.293355	0.677447	1.20746	3.06e-09	9.58e-09	CAMK2N1	35.5663	14.4871	-1.29574	4.37e-22	5.4e-21
	ORM2	TUBA3C	MMD	AC004637.1	RP11-350E12.4		CST5	7.92554	3.63064	4.76385e-27	2.29411e-26	C1QTNF7	-2.46247	1.91236	2.93464e-76	5.47569e-75		HSPB2-C11orf52				DSC2	DLX2									CHRM3	0.178733	1.47825	3.04801	2.38e-23	3.42e-22	NNAT	1.58652	0.659473	-1.26648	3.87e-09	1.2e-08
	KIF20A	ROS1	LINC02202	ETV7	KRT18P28		CALHM1	2.86808	-1.46909	5.22625e-27	2.50813e-26	MRGPRX2	-3.40337	-3.49556	3.08141e-76	5.74364e-75		HCAR3				HMGN3-AS1	AL033519.3									DSC2	5.00198	21.7138	2.11804	2.31e-38	2.98e-36	DLX2	1.28843	0.28259	-2.18884	8.3e-05	0.000155023
	ORC6	TCAM1P	ASPA	FABP7	TEKT1		ADGRF4	3.39974	-0.142172	5.26901e-27	2.52798e-26	CTNNA3	-2.44395	-0.2768	3.26559e-76	6.0807e-75		SKA1				IGLV1-36	PLIN4									HMGN3-AS1	0.523402	1.09605	1.06632	2.23e-24	3.62e-23	AL033519.3	0.450193	0.193332	-1.21947	4.93e-06	1.07e-05
	SOX11	CTD-2105E13.16	GLYAT	E2F2	DNASE1L2		KIF1A	4.30212	4.13904	8.58225e-27	4.08416e-26	SMIM10L2A	-2.14077	2.22783	3.58157e-76	6.66223e-75		GPRIN1				TUBB2B	CHAD									IGLV1-36	6.206	22.9714	1.8881	6.26e-05	0.000118831	PLIN4	10.0309	4.85748	-1.04617	5.43e-06	1.18e-05
	LINC01297	COL9A3	RP11-736K20.5	HAS3	ENPP5		CLDN25	3.86594	-2.81185	8.98778e-27	4.27267e-26	HTR2A	-2.57756	-0.275432	3.83597e-76	7.11359e-75		NMRK2				PCSK1N	CFAP44									TUBB2B	1.97686	9.03462	2.19226	0.00371287	0.00552381	CHAD	25.9005	1.37035	-4.24036	2.27e-33	1.28e-31
	MT1H	TCL1B	CFL2	AC093627.7	RP11-675F6.4		HIST1H2AG	2.25108	2.16629	9.143e-27	4.34532e-26	AGBL1	-5.97494	-3.28452	4.04089e-76	7.48596e-75		CNTNAP3B				BIRC5	LINC02306									PCSK1N	2.45363	9.00168	1.87528	4.19e-17	3.03e-16	CFAP44	1.79025	0.872143	-1.03753	1.48e-20	1.56e-19
	FRGCA	AC012531.2	GPD1	BOC	TGM4		PMCH	2.29049	-3.50213	9.3437e-27	4.43838e-26	CRB2	-2.10677	-0.054852	4.43988e-76	8.19393e-75		FNDC5				ERFE	TEX14									BIRC5	11.2212	24.0137	1.09762	2.56e-20	2.63e-19	LINC02306	0.979837	0.0597172	-4.03632	4.13e-10	1.43e-09
	FOXD1	AC061961.2	ARHGAP20	DPYSL5	CST2		KCNJ6	2.95932	0.260601	1.05465e-26	5.0032e-26	C2orf88	-2.21851	2.35931	6.18288e-76	1.1396e-74		EGR2				YBX1	AL359183.1									ERFE	0.169173	0.414886	1.29421	1.78e-13	8.8e-13	TEX14	1.31486	0.297669	-2.14313	7.02e-08	1.88e-07
	LINC01896	PAGE2	ABRA	OR7E38P	RP5-1170K4.7		CEACAM5	4.35177	5.66726	1.22336e-26	5.7899e-26	DACT2	-2.98282	0.0149825	2.18821e-75	3.99267e-74		CDCA5				MSL3P1	LYPD6B									YBX1	141.908	342.641	1.27174	1.28e-40	2.73e-38	AL359183.1	1.02125	0.468305	-1.12482	5.97e-19	5.22e-18
	CTD-3010D24.3	DPYSL5	PALMD	AC103563.3	KCNH1-IT1		CDH2	2.5727	3.67363	1.28651e-26	6.07926e-26	SCN5A	-2.20366	-0.322592	3.81198e-75	6.93451e-74		RAD51				AC092718.4	ARMC3									MSL3P1	0.188699	0.491996	1.38256	4.96e-20	4.9e-19	LYPD6B	5.58771	1.20648	-2.21145	6.91e-27	1.52e-25
	GS1-594A7.3	RP11-616M22.12	MTURN	ZFP42	FAM57B		PRAME	4.91722	4.84243	1.57352e-26	7.41044e-26	GSTM5	-2.98847	3.59709	2.46304e-74	4.42737e-73		ODF3L1				IGKV1D-8	STEAP2									AC092718.4	4.97659	11.6055	1.22158	2.56e-27	6.03e-26	ARMC3	0.48186	0.199234	-1.27415	7.71e-09	2.3e-08
	CSAG2	RP11-284F21.10	LMOD3	RP11-66B24.1	CTC-461F20.1		MAEL	4.40302	1.09424	1.67997e-26	7.90562e-26	IL6	-2.73763	2.20065	5.79353e-74	1.03525e-72		PDE11A				C2orf48	SPATA20									IGKV1D-8	1.92707	4.75197	1.30211	3.39e-06	7.49e-06	STEAP2	5.2943	1.62808	-1.70127	1.59e-17	1.2e-16
	SMR3B	RP4-616B8.6	AQP7P1	SPEG	RP11-675F6.3		APOA1	3.74669	0.175889	2.19752e-26	1.02878e-25	CLCA4	-3.29556	-0.30751	9.26953e-74	1.6515e-72		CCNB2				C2orf88	CYP4Z2P									C2orf48	0.295434	0.720728	1.28662	1.04e-13	5.26e-13	SPATA20	15.3402	5.27182	-1.54094	1.25e-37	1.4e-35
	C1orf94	RP11-1134I14.2	TNNI2	AC005682.5	GNG3		PLEKHD1	2.44707	2.48652	2.36924e-26	1.10831e-25	CYP26B1	-2.0676	2.99481	1.36053e-73	2.41687e-72		CX3CL1				IGHM	SRCIN1									C2orf88	0.426802	1.54302	1.85412	2.59e-15	1.55e-14	CYP4Z2P	8.83104	3.33313	-1.40571	2.93e-27	6.84e-26
	RP11-254F7.4	RP4-781K5.4	KLHL33	RP11-434H6.2	RP11-132F7.2		C2orf54	3.48369	4.10498	2.60141e-26	1.21567e-25	AL096711.2	-2.06276	-2.24778	1.6038e-73	2.84623e-72		PRC1				AC119424.1	ATP6AP1L									IGHM	169.693	496.534	1.54897	3.1e-07	7.74e-07	SRCIN1	3.17052	1.15801	-1.45307	2.37e-22	3.03e-21
	CDKN2A	VTN	ABCA9	HPDL	RP11-421P23.2		DLX5	2.56756	1.42295	2.68215e-26	1.25275e-25	C6	-3.15312	1.90404	2.25488e-73	3.98612e-72		GLRA4				ZHX1-C8orf76	AL357054.2									AC119424.1	0.137225	1.10219	3.00576	4.43e-15	2.59e-14	ATP6AP1L	1.18217	0.557998	-1.0831	1.48e-30	5.3e-29
	MAGEB1	SNORA2C	RP11-407P15.2	FRMPD4	MAGEB17		AKR7A3	2.57977	4.76153	3.24627e-26	1.51118e-25	IQSEC3	-2.08364	1.19849	2.30195e-73	4.06535e-72		GTSE1				SCNN1B	ATP8B1									ZHX1-C8orf76	0.570633	1.1578	1.02075	1.38e-19	1.29e-18	AL357054.2	0.744374	0.136443	-2.44773	5.71e-20	5.59e-19
	SALL3	AC018890.6	CCDC69	RP11-881M11.8	AC005150.1		AC004233.2	3.64742	-0.753927	4.02406e-26	1.86607e-25	TP63	-2.57399	4.50274	2.52918e-73	4.45367e-72		ANLN				CHODL	AC092667.1									SCNN1B	4.13223	9.05842	1.13234	4.37e-07	1.07e-06	ATP8B1	18.0971	6.64068	-1.44635	3.07e-35	2.31e-33
	KRT8P24	RP4-530I15.6	GPBAR1	CABP7	Z82214.3		HOXC12	4.07375	2.50651	4.18592e-26	1.94064e-25	C10orf142	-2.22875	-3.06053	7.40422e-73	1.29753e-71		KLHL30				GPT2	NAGS									CHODL	0.315479	2.74542	3.12141	2.43e-33	1.36e-31	AC092667.1	0.75156	0.0689193	-3.44691	1.44e-38	1.99e-36
	IGFBPL1	CRP	SCARA5	CDC45	RP11-592N21.2		KLHDC7B	2.93855	4.38515	4.48087e-26	2.07473e-25	ABI3BP	-2.12472	5.125	7.83507e-73	1.3717e-71		CDCA3				KRT86	GATA3-AS1									GPT2	6.05443	16.1769	1.41787	1.28e-26	2.7e-25	NAGS	2.24992	0.889711	-1.33846	1.39e-11	5.63e-11
	FAM72C	SLC25A24P2	EPB42	RP11-576I22.2	CALHM1		CLPS	2.98981	-1.23044	4.56537e-26	2.11224e-25	PTH1R	-2.10798	1.57191	1.1162e-72	1.95227e-71		EZH2				AC012368.1	GREB1L									KRT86	2.48779	8.01011	1.68696	8.69e-18	6.73e-17	GATA3-AS1	5.87864	0.42212	-3.79976	1.02e-40	2.22e-38
	LHX2	LINC00898	MYBPC2	COCH	RP11-452I5.2		SLC6A4	3.84542	3.85397	4.73792e-26	2.18928e-25	HSD11B1	-2.37273	2.27792	1.22394e-72	2.13865e-71		MRGPRF				FBN3	HSH2D									AC012368.1	0.267561	0.549608	1.03854	1.13e-14	6.3e-14	GREB1L	2.24768	0.403961	-2.47615	6.32e-27	1.4e-25
	ONECUT2	TGM3	FXYD1	XXbac-BPG27H4.8	ELOVL2-AS1		LIX1	3.6807	-1.54392	8.32809e-26	3.81039e-25	NTRK2	-2.56973	6.70623	1.41279e-71	2.44279e-70		SPAG5				PHKG1	ASB16									FBN3	0.140102	1.38095	3.30112	5.33e-21	5.86e-20	HSH2D	7.12701	3.52463	-1.01582	9.34e-07	2.21e-06
	TTK	ASCL4	CHRDL1	TDRD12	SCN7A		JPH3	2.43019	0.694768	1.17321e-25	5.32624e-25	PHYHIP	-2.10297	1.26352	1.17748e-70	1.99599e-69		FOS				AC015712.2	AC008663.3									PHKG1	0.553701	1.2173	1.13651	1.89e-05	3.84e-05	ASB16	1.2899	0.5281	-1.28838	4.41e-20	4.38e-19
	TRIM15	LINC00461	MYOZ2	RSPO4	TCAP		CABP7	2.30315	-0.392641	1.18648e-25	5.38247e-25	COL17A1	-2.83867	6.015	3.4937e-70	5.88933e-69		MEOX1				LINC02487	WDR63									AC015712.2	0.296596	0.602123	1.02156	6.85e-19	5.96e-18	AC008663.3	3.65373	0.154589	-4.56286	1.98e-28	5.4e-27
	CSAG3	MALRD1	PPP1R12B	PROX1	CLIC6		SOX11	3.03591	4.05788	1.32681e-25	6.0047e-25	ASB2	-2.01197	1.32764	4.13687e-70	6.96059e-69		GINS1				IGHV1-3	AC107031.1									LINC02487	0.262363	4.74847	4.17783	1.18e-29	3.75e-28	WDR63	0.230918	0.0889605	-1.37614	1.62e-13	8.05e-13
	CTA-992D9.6	HPX	ANGPT4	CALB2	RP11-150O12.5		PYDC1	4.46993	2.65774	1.4681e-25	6.63513e-25	TCEAL5	-2.78359	-0.605489	6.65532e-70	1.11774e-68		FAM110D				SEL1L3	Z82214.2									IGHV1-3	3.85247	8.15677	1.08221	0.000442934	0.000751506	AC107031.1	0.236637	0.0414884	-2.51189	6.84e-17	4.84e-16
	GABRA3	RP11-166N6.2	CD300LG	C12orf77	CYP21A2		ONECUT2	3.36326	2.00657	1.54461e-25	6.97051e-25	RELN	-2.7207	2.5828	1.57937e-69	2.63543e-68		ABCB1				PKP1	AC007485.1									SEL1L3	4.02124	9.63389	1.26048	1.95e-21	2.25e-20	Z82214.2	0.41288	0.0204214	-4.33757	6.49e-15	3.72e-14
	NCAPG	AP000697.6	CASQ1	SLCO1A2	MYT1		CLDN6	4.828	1.28738	1.63257e-25	7.35647e-25	ATF3	-2.05533	5.86264	2.51128e-69	4.16367e-68		SAA2-SAA4				OR2S1P	CLIC6									PKP1	4.51077	22.2179	2.30027	2.81e-18	2.27e-17	AC007485.1	0.929856	0.326125	-1.51158	1.57e-15	9.67e-15
	RP11-546B8.6	GNGT1	MYZAP	RP11-470B22.1	MIR3189		GAD1	3.31413	1.61249	2.40084e-25	1.07252e-24	GPC3	-2.50245	5.3568	2.68882e-69	4.44991e-68		RMI2				TNFRSF9	LIPE									OR2S1P	0.139755	0.799614	2.5164	3.39e-15	2.01e-14	CLIC6	29.0983	3.03504	-3.26115	7.43e-16	4.73e-15
	LINC01956	SHH	PFKFB1	SCRG1	RP11-736K20.4		HIST1H3I	5.62411	-2.64189	2.49948e-25	1.11549e-24	MYL1	-7.74205	3.65604	2.82162e-69	4.66544e-68		ASB15				PI3	MYB-AS1									TNFRSF9	0.478108	0.989781	1.04977	2.78e-11	1.09e-10	LIPE	4.22496	1.922	-1.13633	5.21e-15	3.02e-14
	BPIFB3	PRB3	RBP4	TMEM213	RP11-890B15.2		TRH	5.73007	4.6625	3.29501e-25	1.46297e-24	FAM189A2	-2.14673	4.06795	4.33642e-69	7.1376e-68		VIT				TF	SLC7A8									PI3	3.7717	63.7388	4.07889	5.54e-27	1.24e-25	MYB-AS1	0.300113	0.0544973	-2.46125	5e-25	8.72e-24
	RP11-336N8.4	RP11-22C11.1	DMGDH	SLC18A3	KCNK6		C1orf194	2.25284	-0.312929	3.45255e-25	1.53142e-24	CLEC4G	-3.0405	-1.49903	5.63157e-69	9.24423e-68		OIP5				CD180	DNAL1									TF	1.96125	7.97485	2.02369	5.42e-12	2.29e-11	SLC7A8	30.5763	6.1242	-2.31982	7.97e-43	3.1e-40
	SPRR2E	AMER3	LEPR	PQLC2L	AC073325.1		VSTM2L	2.68272	2.55404	4.03177e-25	1.78442e-24	EPHB1	-2.22257	2.65339	1.19284e-68	1.95099e-67		SAA1				MPZL2	CASC16									CD180	1.31402	3.29725	1.32728	1.08e-09	3.54e-09	DNAL1	3.05303	1.36645	-1.15981	3.56e-39	5.59e-37
	TUBB4A	COL6A5	HCAR2	KIF1A	CFD		BCAS1	2.44665	5.44879	4.20323e-25	1.85849e-24	GPR17	-2.32332	-0.707201	3.04636e-68	4.9337e-67		PAPPA2				PNMA6A	PGAM1P5									MPZL2	5.40528	13.7055	1.34231	1.63e-31	6.95e-30	CASC16	0.806145	0.0215755	-5.22357	8.02e-25	1.37e-23
	SCGB1B2P	LINC01385	TRDN	KRT8P24	LINC02149		FRMPD3	2.00151	2.24298	4.64455e-25	2.05013e-24	SCN3B	-2.17249	0.946258	9.96197e-68	1.59577e-66		NCAPH				IGHV3-21	AC131953.1									PNMA6A	0.285215	0.96555	1.7593	5.8e-08	1.57e-07	PGAM1P5	0.253665	0.0517417	-2.29352	1.28e-15	7.97e-15
	CTD-2139B15.5	MNX1-AS2	HEPACAM	OR7E101P	AL121578.2		INHA	2.83091	1.71301	4.67318e-25	2.06226e-24	GRIN2B	-2.79743	-0.266674	1.28847e-67	2.05735e-66		SCN2B				C16orf95	AC145138.1									IGHV3-21	55.2493	150.225	1.4431	3.49e-06	7.71e-06	AC131953.1	0.445698	0.131339	-1.76278	8.15e-25	1.38e-23
	FAM64A	RP11-1C8.4	TRHDE-AS1	GINS4	NLRP12		NXPH4	2.45272	2.84519	4.96034e-25	2.18686e-24	C2orf40	-2.93458	2.79588	1.71566e-67	2.73226e-66		ASB12				AC090907.1	F7									C16orf95	0.242457	0.550628	1.18335	8.82e-22	1.05e-20	AC145138.1	0.23692	0.10313	-1.19994	1.4e-12	6.27e-12
	CENPF	RP11-417L19.2	ADRA1A	LINC01956	SMPD3		FSD1	2.87581	-0.262733	5.26808e-25	2.32028e-24	PPDPFL	-5.7629	-1.12099	8.03535e-67	1.26743e-65		ITLN1				MELTF-AS1	IGFALS									AC090907.1	0.496794	1.11742	1.16945	6.5e-07	1.56e-06	F7	2.79066	1.00277	-1.47661	1.15e-39	2.02e-37
	AC012354.6	SLITRK6	OXTR	FAM19A4	LINC01983		SPINK4	3.70068	-0.727858	5.75988e-25	2.53259e-24	AKR1C2	-3.02067	4.85068	1.40198e-66	2.20182e-65		FOXM1				GPR3	GPR1									MELTF-AS1	2.21815	5.48118	1.30513	4.5e-20	4.46e-19	IGFALS	2.45847	0.558488	-2.13816	6.5e-32	2.99e-30
	ELAVL3	SLC1A6	AOC4P	GRHL3	CCDC151		SUSD3	2.11309	5.84717	5.86883e-25	2.57862e-24	BMP2	-2.138	1.76981	2.98891e-66	4.66183e-65		AKR1C3				TREHP1	CHRNA9									GPR3	0.340522	0.953127	1.48492	8.58e-23	1.15e-21	GPR1	0.790816	0.365417	-1.1138	2.67e-09	8.4e-09
	SPRR1B	RP5-1002M8.4	HBA2	CHODL-AS1	C16orf92		MAST1	2.06959	1.07188	6.45782e-25	2.83261e-24	MMP27	-2.55444	-1.47158	3.50355e-66	5.45046e-65		CENPM				CYP1B1	LMNTD2									TREHP1	0.168504	0.466918	1.47038	4.75e-05	9.15e-05	CHRNA9	4.44892	0.0638336	-6.123	2.97e-05	5.87e-05
	OTOP1	CPB1	RP1-28O10.1	NT5DC4	RP11-527H14.4		FOXD3	3.06209	-0.577336	6.76542e-25	2.96395e-24	HOXA6	-2.31253	-0.451504	9.30092e-66	1.42617e-64		KIF14				C2CD4D	NOVA1									CYP1B1	13.5904	37.247	1.45454	0.00758304	0.0108091	LMNTD2	1.55949	0.715945	-1.12315	1.9e-15	1.16e-14
	HAPLN1	RP11-675F6.4	NMUR1	FGFBP2	GNG13		FOXD1	2.95776	0.815289	7.12203e-25	3.11492e-24	RERGL	-2.84311	1.34795	1.10899e-65	1.69762e-64		DEPDC1B				AKAP3	IRS1									C2CD4D	0.976557	3.08419	1.65911	1.47e-21	1.72e-20	NOVA1	2.99664	0.253816	-3.56149	1.01e-27	2.55e-26
	S100A9	MAP3K19	DDR2	RPL23AP49	RP4-781B1.5		IL20	3.43364	2.35918	8.56545e-25	3.73274e-24	SLC7A3	-3.05447	-0.0395106	1.21274e-65	1.85019e-64		HPSE2				TAP1	Z97633.1									AKAP3	0.374995	0.798417	1.09027	3.33e-08	9.28e-08	IRS1	8.579	2.99624	-1.51765	2.86e-25	5.11e-24
	CDCA8	RP1-60O19.1	TIMP4	SLC6A11	GADD45G		MINDY4B	2.35849	-1.3036	8.68727e-25	3.78491e-24	MYH6	-3.58223	-2.36425	1.85853e-65	2.82593e-64		UTS2B				SCRG1	CEACAM5									TAP1	26.9978	57.4565	1.08963	5.07e-10	1.73e-09	Z97633.1	0.489591	0.181533	-1.43135	2.23e-27	5.32e-26
		SNORA12	C1QTNF9	SMIM10L2B	PLA2G16		CRYBA2	4.73136	-1.49828	9.57368e-25	4.16511e-24	CSF3	-3.64864	-0.99974	3.42254e-65	5.17801e-64		TOP2A				PPP1R14B	STMND1									SCRG1	0.426009	3.48327	3.03149	4.42e-22	5.45e-21	CEACAM5	15.2	2.65684	-2.51629	1.07e-29	3.43e-28
		LINC01665	CD36	INA	UCN		ORM2	4.50633	2.10011	1.01313e-24	4.40137e-24	RGS2	-2.00334	5.49066	3.8567e-65	5.82912e-64		CDC20				CDC45	FBXL7									PPP1R14B	39.5442	79.9101	1.01491	6.37e-24	9.77e-23	STMND1	5.27562	0.411961	-3.67876	5.93e-38	7.12e-36
		AKAP14	G0S2	GPAT3	CTTNBP2		HIST2H2AB	4.07371	-1.50592	1.18409e-24	5.13058e-24	MYOCD	-2.30318	0.272003	3.97824e-65	5.99875e-64		URAD				USH1C	AC005544.1									CDC45	3.4968	7.50185	1.10121	1.75e-23	2.56e-22	FBXL7	8.1413	2.66967	-1.6086	2.14e-29	6.52e-28
		TCF24	ANKRD53	SERPINB2	GNAQP1		GABRA5	5.76868	-0.743212	1.30905e-24	5.65986e-24	P2RX6	-2.32455	-0.90331	4.52592e-65	6.79637e-64		FAM83D				DEFB1	MISP3									USH1C	0.162858	0.534628	1.71492	2.03e-09	6.45e-09	AC005544.1	0.407702	0.110127	-1.88835	5.26e-22	6.45e-21
		LINC01208	SCN4A	C7orf77	APOA1		CDC20B	5.15385	2.84467	1.56616e-24	6.75704e-24	MAPK10	-2.0162	3.29415	1.42189e-64	2.10902e-63		HAGHL				CD164L2	BTG2									DEFB1	6.03931	23.9511	1.98764	1.84e-18	1.52e-17	MISP3	7.20721	3.27448	-1.13817	5.84e-23	8.02e-22
		IDO1	DHRS7C	IGSF23	RP11-95P2.3		CCL7	3.7332	-0.699783	1.69548e-24	7.30628e-24	TP53AIP1	-2.27673	0.168159	3.13724e-64	4.61935e-63		CLDN19				AL445250.1	CCDC125									CD164L2	0.578169	1.22681	1.08534	7.7e-10	2.58e-09	BTG2	120.418	33.4504	-1.84795	1.84e-29	5.66e-28
		GACAT2	CDO1	CARD17	MYOC		TNNI3	3.50137	0.699412	1.71098e-24	7.37134e-24	CYP1A1	-3.61849	-0.358834	3.38665e-64	4.97852e-63		BIRC5				GAL	PLA2G3									AL445250.1	0.345082	0.943437	1.45099	1.46e-17	1.11e-16	CCDC125	5.96198	2.06701	-1.52824	8.3e-44	3.98e-41
		RP11-644C3.1	COX6A2	RP11-1069G10.2	AC023137.2		XKR7	4.87454	0.445669	1.71536e-24	7.38847e-24	PROX1	-2.21541	2.02907	7.0781e-64	1.03464e-62		RECQL4				GLYATL2	ADCY1									GAL	1.50497	10.0107	2.73374	2.7e-28	7.26e-27	PLA2G3	0.706887	0.244595	-1.53109	0.00254619	0.00388024
		RP11-883A18.3	PLXNA4	RP11-13P5.2	MSMB		PPM1E	2.31801	1.69466	1.7267e-24	7.43555e-24	HOXA2	-2.1143	-0.267084	1.04724e-63	1.52467e-62		ESPL1				RAPSN	CBLN2									GLYATL2	16.5089	38.9386	1.23795	5.81e-15	3.35e-14	ADCY1	4.72093	0.822104	-2.52168	2.58e-21	2.95e-20
		R3HDML	RP11-311H10.4	RP11-254F7.4	KRT1		TRPM5	3.73126	-1.49074	2.10781e-24	9.05093e-24	CCL28	-2.41253	5.42621	1.5941e-63	2.31527e-62		MKI67				AL031602.1	TMEM45B									RAPSN	0.139114	0.71816	2.36804	4.05e-06	8.9e-06	CBLN2	3.32209	0.0553754	-5.9067	4.88e-07	1.19e-06
		RP11-506O24.1	SLC7A10	TRIP13	HOXB1		MAGEA1	7.73691	1.13003	2.33513e-24	1.0001e-23	RGS6	-2.30716	0.830413	2.06732e-63	2.99299e-62		CMA1				CSAG3	DDO									AL031602.1	0.21016	0.648178	1.6249	2.14e-06	4.85e-06	TMEM45B	6.23603	3.03782	-1.03759	2.3e-21	2.64e-20
		RNU1-67P	ABCA8	RP11-359E19.2	HMP19		CCDC185	2.84419	-2.16752	2.35686e-24	1.00917e-23	TEPP	-2.51546	-1.58867	2.71925e-63	3.92433e-62		DUSP27				INSL3	GDF15									CSAG3	0.195513	1.12044	2.51873	5.04e-09	1.54e-08	DDO	1.96505	0.970373	-1.01795	4.17e-14	2.2e-13
		RP11-466M21.1	ACTN2	QPCT	RP11-462P6.1		NEURL1	2.56526	3.89189	2.54927e-24	1.0895e-23	NXNL1	-2.7742	-3.67685	4.61626e-63	6.63564e-62		CENPU				IGHD3-3	AREG									INSL3	0.185718	0.402986	1.11761	1.5e-21	1.75e-20	GDF15	12.341	3.17268	-1.95969	2.1e-27	5.02e-26
		CFAP65	RP5-965F6.2	LGR6	RHPN1		NOTUM	2.49814	0.144316	2.81615e-24	1.20017e-23	DLGAP2	-2.06777	-1.69477	9.85562e-63	1.40778e-61		DUSP26				LYPD5	AP006284.1									IGHD3-3	1.60129	3.77212	1.23614	3.74e-06	8.23e-06	AREG	35.9722	7.64741	-2.23384	1.43e-09	4.64e-09
		BPIFA2	PDK4	PRR27	GHRH		HS6ST3	2.85414	3.66457	2.91228e-24	1.24055e-23	PRELP	-2.02315	6.33358	1.06184e-62	1.51435e-61		ASB10				CHI3L1	BCAM									LYPD5	0.779171	3.62493	2.21794	3.63e-18	2.91e-17	AP006284.1	2.31032	0.770439	-1.58434	6.34e-13	2.95e-12
		Z82214.3	BHMT2	RP11-378I6.1	LINC00176		ASCL2	2.09247	2.25991	2.97919e-24	1.26876e-23	AOX1	-2.20157	4.0862	1.13069e-62	1.61128e-61		CCNA2				CAPN6	TTC25									CHI3L1	17.5257	93.6346	2.41757	9.32e-27	2.01e-25	BCAM	84.0829	25.2308	-1.73663	1.46e-35	1.15e-33
		KRT8P17	CCDC3	GALR2	KLHL1		CARD17	2.96554	-2.32356	3.1348e-24	1.33284e-23	PIK3C2G	-2.64479	2.74414	6.27812e-62	8.84245e-61		SLC24A2				AP001783.1	MT1DP									CAPN6	1.418	17.2711	3.60643	3e-10	1.05e-09	TTC25	1.07397	0.45983	-1.22378	5.42e-18	4.28e-17
		RP11-351J23.1	ABCA10	C1orf94	LINC00238		CACNA1H	2.37303	5.37622	3.15012e-24	1.33904e-23	S100B	-2.75631	4.064	8.30393e-62	1.16776e-60		TRIM54				MS4A1	CDON									AP001783.1	0.267031	2.84879	3.41527	9.83e-34	5.91e-32	MT1DP	1.30739	0.643326	-1.02307	1.24e-07	3.23e-07
		CTD-2314B22.1	MARC1	GGH	SLC22A18		GPR37L1	2.18644	0.663491	3.20802e-24	1.36269e-23	PLCZ1	-3.01309	-2.53211	1.06911e-61	1.49766e-60		TMC2				GTSF1	MYRIP									MS4A1	1.71191	5.05962	1.56342	0.000109588	0.00020153	CDON	2.94981	1.47118	-1.00364	2.04e-12	9e-12
		RP11-62C7.2	KLF15	AC007182.6	ARPP21		RUNDC3A	3.1929	2.30579	3.29433e-24	1.39903e-23	STON1-GTF2A1L	-2.22591	-2.87986	4.39041e-61	6.07529e-60		AC007906.2				SLC6A11	NPY6R									GTSF1	0.404291	1.32561	1.71319	9.21e-05	0.000171263	MYRIP	1.07563	0.343079	-1.64856	2.7e-23	3.86e-22
		AC005150.1	FABP4	IL37	STPG3-AS1		LCN12	2.02795	1.53301	3.36598e-24	1.42912e-23	NRG2	-2.32938	1.26915	4.70708e-61	6.49863e-60		C1QTNF6				YBX1P2	LRP2									SLC6A11	0.386058	1.59098	2.04302	2e-27	4.79e-26	NPY6R	0.340991	0.032454	-3.39326	2.24e-07	5.68e-07
		NELL1	LDB2	PRSS27	SLIT1		SYT1	2.97731	5.21934	6.05011e-24	2.54141e-23	HMCN2	-2.09333	2.42083	1.01728e-60	1.39386e-59		PPP1R3A				CTSV	HECTD2									YBX1P2	0.293201	0.734176	1.32424	3.38e-31	1.34e-29	LRP2	8.32306	2.52006	-1.72366	1.03e-11	4.22e-11
		CDSN	CA4	TAP1	RP11-127I20.5		MCIDAS	2.69499	0.999669	6.54619e-24	2.74408e-23	NTF4	-2.44463	0.112591	1.31553e-60	1.7944e-59		AURKB				EPHA7	ZNF214									CTSV	1.24629	6.19658	2.31383	1.87e-35	1.43e-33	HECTD2	2.08277	0.977178	-1.09181	1.12e-25	2.14e-24
		PAGE2B	ALDH1L1-AS2	PRKAG3	SERPINC1		MYO3B	3.32776	2.6491	7.22306e-24	3.02293e-23	SSTR1	-2.31006	-0.264434	1.43138e-60	1.94803e-59		SCN11A				LINC00393	AC084026.2									EPHA7	0.19276	1.3684	2.82762	0.000672925	0.00111293	ZNF214	1.13172	0.402452	-1.49163	3.76e-19	3.36e-18
		ERVV-1	EBF3	KCNJ2	CTD-2105E13.16		IGFBPL1	2.49152	-0.774498	7.39317e-24	3.09127e-23	CNTNAP3	-2.29513	1.02927	2.40255e-60	3.24541e-59		ESCO2				AC005696.1	SYTL4									LINC00393	0.16136	2.14686	3.73387	4.4e-33	2.37e-31	AC084026.2	0.856095	0.343214	-1.31866	0.00698677	0.0100005
		CRISP3	GHR	LHX5	RP1		SPACA4	2.05149	-1.51495	7.41697e-24	3.09979e-23	THRSP	-2.7887	4.54893	8.44306e-60	1.12461e-58		OVCH2				LINC02004	CYB5D2									AC005696.1	0.674062	1.42733	1.08237	1.33e-15	8.24e-15	SYTL4	5.67912	1.62957	-1.80117	5.49e-40	1.02e-37
		RP11-21G15.1	CIDEC	DDN	TMC3		DISP3	2.26042	0.908864	7.7248e-24	3.22696e-23	CNKSR2	-2.09152	0.891057	1.05554e-59	1.39878e-58		NWD2				IGKV2D-29	AL390294.1									LINC02004	0.221126	0.622037	1.49213	6.51e-16	4.17e-15	CYB5D2	12.5725	5.69768	-1.14182	1.39e-29	4.36e-28
		RNU1-134P	SEMA3G	ULBP1	GRM4		HIST1H4B	4.64062	-1.4967	8.03753e-24	3.35529e-23	MYPN	-4.05572	0.948987	1.43168e-59	1.89171e-58		TMEM178A				KIAA1755	DUBR									IGKV2D-29	11.8328	39.7849	1.74942	0.00113411	0.00181788	AL390294.1	2.16847	0.188881	-3.52113	3.91e-33	2.14e-31
		RP11-486M23.2	AMPD1	AC067960.1	CCDC187		HMGA2	2.63164	0.0672992	8.41216e-24	3.50845e-23	CLCN1	-2.21794	-1.0743	1.88648e-59	2.48542e-58		DSC1				INTS6L	STK32B									KIAA1755	1.06849	2.96437	1.47215	8.82e-13	4.04e-12	DUBR	2.01996	0.878512	-1.20119	5e-22	6.14e-21
		RP11-8L2.1	GALNT15	SH2D2A	SLC22A24		GDPD2	2.87657	0.184536	8.86304e-24	3.68887e-23	AK5	-2.37092	4.37816	2.49778e-59	3.27891e-58		RASSF9				PRSS51	OSBPL6									INTS6L	0.999193	2.23182	1.15939	4.72e-25	8.28e-24	STK32B	3.55598	0.426037	-3.0612	3.1e-34	2.04e-32
		BPIFB6	ACSL1	FAM83D	SSTR5-AS1		PLA2G4D	2.4014	-1.26615	9.48585e-24	3.94267e-23	SEMA3D	-2.09201	2.75063	3.54715e-59	4.64301e-58		CENPA				BANK1	MIR4477B									PRSS51	0.248674	0.708826	1.51117	0.00194141	0.00301392	OSBPL6	1.34034	0.487135	-1.4602	1.06e-20	1.13e-19
		CCDC60	CAPN3	GZMB	AL050303.10		CCNO	2.45287	3.71024	1.06788e-23	4.43138e-23	ENAM	-2.35203	-2.53958	5.88226e-59	7.64989e-58		CILP2				POU2AF1	CYBRD1									BANK1	0.536543	1.4011	1.3848	0.000141371	0.000255999	MIR4477B	12.617	4.21682	-1.58114	0.0188353	0.0251961
		PRMT8	GYS2	AC108025.2	CTC-490E21.13		CHST1	2.09235	4.61046	1.24856e-23	5.15992e-23	ADRB3	-2.8124	-2.69783	1.21945e-58	1.57574e-57		KCNE1				CXCL10	AL358913.1									POU2AF1	1.03576	2.894	1.48237	1.35e-10	4.92e-10	CYBRD1	67.0253	21.1981	-1.66077	4.04e-25	7.14e-24
		FAM135B	KCNA7	FOXG1	HAO2		TUBA3D	2.87585	2.751	1.57141e-23	6.47354e-23	ADGRD2	-3.59594	0.368916	1.30046e-58	1.67683e-57		ESM1				BANF1P2	MRPS30									CXCL10	31.7705	131.303	2.04714	1.69e-13	8.36e-13	AL358913.1	1.79416	0.0271928	-6.04394	2.28e-27	5.41e-26
		HTR1E	CAV3	HRASLS	NEUROD2		CCL20	2.50665	0.576957	1.75606e-23	7.21132e-23	ADGRG4	-3.04626	-3.417	1.36371e-58	1.75466e-57		COMP				TNNT2	PLIN1									BANF1P2	0.201083	0.493874	1.29635	2.52e-13	1.23e-12	MRPS30	26.6953	6.23657	-2.09776	9.55e-26	1.83e-24
		AACSP1	LMOD1	RP13-347D8.1	RP11-709P2.1		C1orf189	2.08741	-1.69216	2.17825e-23	8.9048e-23	EGR3	-2.12153	5.34272	2.50222e-58	3.20366e-57		PPP1R14A				AC104066.1	ADGRV1									TNNT2	0.182706	0.858559	2.23239	9.84e-12	4.04e-11	PLIN1	8.51656	3.16028	-1.43022	7.4e-11	2.77e-10
		TPSG1	RP1-302G2.5	PTPRZ1	PPP1R14D		SYN1	2.07658	1.67524	2.7863e-23	1.13217e-22	BMP3	-3.36618	0.349639	1.06367e-57	1.34011e-56		GPR182				LHX2	SLC25A48									AC104066.1	0.203979	0.426969	1.06571	4.91e-12	2.08e-11	ADGRV1	1.23024	0.227838	-2.43286	6.4e-20	6.24e-19
		RBAKDN	GNG11	FCAMR	ENPP7P11		UNC5A	2.33689	3.13962	2.89665e-23	1.1749e-22	LRRN3	-2.16591	1.76114	1.80445e-57	2.24844e-56		MTFR2				HMGA1	AXIN2									LHX2	0.250405	0.799172	1.67424	3.14e-08	8.74e-08	SLC25A48	1.27143	0.070179	-4.17927	3.7e-22	4.6e-21
		SNORA74A	LGALS12	TCEAL2	MAP3K19		EFNA2	3.4073	-2.71517	3.65259e-23	1.47526e-22	HBG2	-2.21396	-3.02026	2.50365e-57	3.10476e-56		GJB2				ANLN	PANK3									HMGA1	50.5533	134.646	1.41329	3.57e-34	2.32e-32	AXIN2	1.94109	0.928178	-1.06439	4.95e-21	5.46e-20
		AC123023.1	MYL2	APCDD1L-AS1	AP004372.1		SRD5A2	2.34285	-0.278142	4.30961e-23	1.73483e-22	CNTFR	-2.6165	3.20129	2.79817e-57	3.46763e-56		DEPDC1				AC107294.3	KCNMA1-AS3									ANLN	6.66527	15.1728	1.18675	9.01e-22	1.08e-20	PANK3	15.4841	7.51225	-1.04347	7.88e-27	1.72e-25
		CCKBR	TMEM220	ALX3	TNXA		PRLH	2.9055	-3.18653	5.13898e-23	2.05956e-22	SLC8A3	-2.0652	-1.47637	3.35532e-57	4.15241e-56		WDR86				IGLV3-9	LRBA									AC107294.3	0.502746	1.55956	1.63324	1.74e-08	4.98e-08	KCNMA1-AS3	0.286103	0.122129	-1.22813	9.39e-22	1.12e-20
		CCDC83	HMGB3P10	DNM1P51	SNORA11		SERPINB7	3.60485	1.23463	5.97751e-23	2.38982e-22	GALR1	-2.71182	-3.01171	9.60762e-57	1.17538e-55		TECRL				ESYT3	SSBP2									IGLV3-9	7.82892	40.6942	2.37794	0.000737977	0.00121357	LRBA	15.1755	6.17608	-1.29698	6.89e-31	2.61e-29
		NTNG1	SGK2	KCNJ10	RP11-477H21.2		HIST1H2AB	3.95293	-2.58358	6.28513e-23	2.51004e-22	SAA2	-2.81747	4.19417	1.27841e-56	1.56083e-55		GRIA4				SLC45A3	AC104984.1									ESYT3	0.141191	0.709621	2.3294	1.17e-35	9.36e-34	SSBP2	3.60554	1.79407	-1.00698	1.19e-23	1.77e-22
		RP11-734K21.2	FBXO40	NUF2	CCDC83		RNASE10	2.32885	-2.61612	7.38781e-23	2.94394e-22	C6orf58	-2.0113	-2.61945	1.43361e-56	1.74679e-55		SHCBP1				CTSW	TRIM3									SLC45A3	2.07795	5.00833	1.26917	4.98e-15	2.9e-14	AC104984.1	0.298749	0.0328012	-3.18711	8.29e-06	1.76e-05
		EN1	ADRB2	IFNL4	DNAJC1		LTB	2.17824	3.42324	7.85171e-23	3.12674e-22	MYO18B	-2.71346	0.960908	2.40767e-56	2.91409e-55		ADAMTS14				ZNF488	C9orf152									CTSW	2.78257	5.57989	1.00382	1.35e-05	2.79e-05	TRIM3	6.10935	2.15462	-1.50358	6.11e-38	7.28e-36
		SYNPR-AS1	PLAC9	LIN28B	RP11-95P2.4		MSMB	4.01397	4.38883	8.21681e-23	3.26926e-22	OTC	-3.14482	-3.67182	3.47551e-56	4.18699e-55		CENPE				GPR12	SAMD15									ZNF488	0.226847	0.665039	1.55172	1.7e-16	1.15e-15	C9orf152	12.01	4.5077	-1.41377	1.6e-25	2.98e-24
		SLC18A1	ADH1B	PTCHD1-AS	PDGFD		DNAJC12	2.07344	5.49881	9.48764e-23	3.76252e-22	CCL16	-2.1984	-2.5386	5.4313e-56	6.50001e-55		E2F1				SYT8	BEX1									GPR12	0.106667	3.29874	4.95073	2.78e-24	4.45e-23	SAMD15	1.75279	0.449769	-1.96239	3.38e-37	3.6e-35
		LINC01727	LINC01230	SLC2A6	RNU4-1		PROZ	2.10041	-1.11129	9.61119e-23	3.81068e-22	TCEAL6	-2.10109	-3.30105	6.6163e-56	7.89218e-55		CDC45				VNN1	AC092071.1									SYT8	1.13454	4.93596	2.12123	5.29e-20	5.21e-19	BEX1	22.0379	1.85292	-3.57212	0.000234903	0.00041367
		NFE4	DGAT2	RP11-307C19.1	HUS1B		SMC1B	2.29484	1.11001	9.64397e-23	3.82284e-22	RNASE7	-2.56788	-0.713172	1.66965e-55	1.97347e-54		TACR1				TRAF3IP3	CYB5A									VNN1	0.531889	2.9766	2.48447	4.76e-08	1.3e-07	AC092071.1	2.16517	0.0827216	-4.71007	7.77e-26	1.5e-24
		TUFMP1	RP11-159H22.2	COL26A1	CHGB		KCNH2	2.35415	2.52376	1.01115e-22	4.0064e-22	LMX1A	-2.44008	-1.46589	1.0151e-54	1.18287e-53		ZBTB16				AL136366.1	SNORD123									TRAF3IP3	1.02922	2.4637	1.25928	1.75e-11	7.01e-11	CYB5A	15.0264	7.13232	-1.07506	3.56e-23	5.02e-22
		TMEM179	SPRY2	CNIH2	RDH16		ZPLD1	3.38143	1.765	1.14124e-22	4.50612e-22	EFCAB1	-2.35801	0.389928	1.10489e-54	1.28421e-53		CCL11				AL512363.1	TPH1									AL136366.1	0.160231	1.17955	2.88002	1.06e-26	2.27e-25	SNORD123	0.495712	0.229275	-1.11243	0.000351242	0.000603957
		GTSF1	LINC01697	LEMD1	HOXC4		KCNH6	3.91725	-0.73253	1.1714e-22	4.6222e-22	SCN2A	-2.31689	1.65794	2.54164e-54	2.91862e-53		PAK5				TTLL4	DNASE2B									AL512363.1	0.191384	0.454294	1.24715	1.51e-10	5.47e-10	TPH1	1.02721	0.222982	-2.20373	0.0179886	0.0241407
		CITF22-24E5.1	CH17-469D17.1	CTA-384D8.31	RP11-624L4.2		CD1A	2.95024	0.873323	1.17454e-22	4.6336e-22	PTN	-2.37595	5.50614	4.0264e-54	4.60323e-53		UBE2S				BANCR	SUSD3									TTLL4	3.3796	11.0902	1.71436	1.08e-37	1.24e-35	DNASE2B	0.697265	0.297659	-1.22805	6.19e-05	0.000117662
		RP4-781K5.6	CNN1	AP000439.5	MCIDAS		USP41	2.6626	-1.64077	1.23773e-22	4.87863e-22	GFAP	-2.43485	0.740585	5.06255e-54	5.77691e-53		RAD54L				2020-09-03	TBC1D30									BANCR	0.113257	2.23975	4.30567	4.31e-17	3.11e-16	SUSD3	56.4959	6.09749	-3.21186	1.45e-30	5.22e-29
		LINC01648	ANGPTL5	ANKRD1	Z69890.1		ELFN2	2.84985	0.679746	1.28088e-22	5.04434e-22	GADL1	-3.12839	-1.74244	5.30766e-54	6.0528e-53		ANKRD29				BMP2	NHLRC4									2020-09-03	2.79584	8.03403	1.52284	1.34e-14	7.47e-14	TBC1D30	2.82284	1.40374	-1.00787	9.03e-21	9.74e-20
		RP11-1193F23.1	CLMP	GRK1	LINC01214		DOK7	2.29907	3.30046	1.36881e-22	5.38011e-22	NR4A3	-2.04159	3.26686	2.00395e-53	2.25135e-52		CRYAB				PSORS1C3	LRRC37A3									BMP2	0.465597	1.63099	1.8086	2.3e-09	7.3e-09	NHLRC4	2.82621	0.634346	-2.15552	6.29e-22	7.65e-21
		LINC01833	NNAT	AL592528.1	RASL11B		SCRT1	3.16889	-1.25229	1.52282e-22	5.97641e-22	IRX6	-2.38614	1.46296	2.11178e-53	2.37102e-52		SERTM1				THEM5	AZU1									PSORS1C3	0.112235	0.801243	2.83572	1.09e-16	7.57e-16	LRRC37A3	1.21897	0.589137	-1.04898	2.97e-18	2.4e-17
		RP11-274H24.1	ADAMTS9-AS2	C5orf46	NXNL1		SHISA8	2.59495	-2.08452	1.55425e-22	6.09712e-22	GLDN	-2.07933	2.35027	3.63053e-53	4.05864e-52		ACADL				AC009495.3	AC008555.5									THEM5	2.09072	7.21665	1.78733	7.18e-07	1.72e-06	AZU1	0.816639	0.238416	-1.77622	1.06e-19	1.01e-18
		CHGB	AKAP12	BAIAP2L2	SLITRK6		IFNB1	3.31814	-3.62787	1.71604e-22	6.72161e-22	OGN	-2.36043	5.17515	6.43828e-53	7.14905e-52		KIF15				MORN3	CCDC96									AC009495.3	0.285267	0.711697	1.31895	3.71e-26	7.47e-25	AC008555.5	1.54694	0.742054	-1.05982	3.37e-19	3.03e-18
		APOBEC4	FAM180B	LINC02189	AC002383.2		CSAG3	5.62328	-1.67901	2.16404e-22	8.42912e-22	PNMA8C	-2.77641	-2.71693	2.18818e-52	2.39749e-51		MYOM2				FOXD1	SLC30A8									MORN3	0.961888	1.94025	1.0123	0.0157393	0.0213082	CCDC96	3.17444	1.22862	-1.36946	3.21e-31	1.28e-29
		MIR181A1HG	CASQ2	LAMC2	ZSWIM5P2		IFNL1	2.96982	-2.45828	2.25415e-22	8.77069e-22	SLC7A14	-2.57889	-2.65988	4.20709e-52	4.59013e-51		BGN				COLEC11	KRT32									FOXD1	0.494025	1.57841	1.67582	4.3e-06	9.42e-06	SLC30A8	13.7186	0.293803	-5.54514	6.36e-22	7.73e-21
		RP11-445F12.1	IDI2	DEPDC1-AS1	C18orf65		GDF9	2.97205	3.05225	2.49245e-22	9.68337e-22	GFRA2	-2.06735	0.812603	4.83331e-52	5.26072e-51		IQANK1				ZNF750	SHROOM1									COLEC11	0.256453	0.613806	1.25909	2.92e-09	9.13e-09	KRT32	0.504121	0.176012	-1.5181	3.09e-08	8.63e-08
		MIR3609	PDZD2	TDGF1	MAPT-AS1		TMPRSS6	2.53119	3.1674	2.67397e-22	1.0373e-21	DPP6	-2.68449	-0.130073	5.30372e-52	5.76926e-51		VIP				AC092535.4	CCDC30									ZNF750	2.09105	4.76335	1.18775	2.21e-16	1.48e-15	SHROOM1	16.8508	2.49615	-2.75505	1.88e-18	1.55e-17
		CYP2F1	LMOD2	RP11-445O3.1	SMCO3		DYDC2	2.13101	0.210681	2.69334e-22	1.0446e-21	ASB4	-2.47127	-1.32133	9.02124e-52	9.78379e-51		SOD3				F5	PNMA2									AC092535.4	1.50321	3.63726	1.27481	1.83e-07	4.7e-07	CCDC30	0.61377	0.304989	-1.00894	3.93e-24	6.2e-23
		C4orf51	ADIPOQ	GLT1D1	PODN		NBPF4	3.1832	1.16276	2.77947e-22	1.07708e-21	ELANE	-2.38572	-2.43749	9.74691e-52	1.05645e-50		RDM1				CMTM7	GRAMD4P8									F5	0.477681	1.1814	1.30638	2.47e-07	6.25e-07	PNMA2	1.37612	0.593727	-1.21274	1.12e-07	2.92e-07
		RIMS2	DOCK11	MYBL2	RP3-439F8.1		KPNA7	2.05227	-0.954665	3.46486e-22	1.33925e-21	ACKR1	-2.32679	5.04916	1.7708e-51	1.90795e-50		COL25A1				CHEK1	CACNA1H									CMTM7	4.74428	14.5806	1.61978	2.84e-30	9.92e-29	GRAMD4P8	1.38129	0.066687	-4.37247	4.98e-35	3.62e-33
		AC011294.3	LINC00968	RP11-39H3.2	RP11-284F21.9		MEIKIN	2.15986	-3.78506	3.67791e-22	1.41948e-21	NSG1	-2.19304	1.94906	1.77566e-50	1.86665e-49		JPH2				ICOS	CYP4F29P									CHEK1	2.39269	5.47225	1.1935	3.21e-28	8.52e-27	CACNA1H	5.98527	0.664953	-3.17009	2.28e-28	6.18e-27
		LRRC24	PKHD1L1	SEC14L4	PNMT		NPTX2	2.24343	2.14449	4.36613e-22	1.68117e-21	RGS7BP	-2.10259	-0.511287	5.31714e-50	5.52563e-49		POLQ				RF02246	AC015813.4									ICOS	0.775604	1.6517	1.09056	1.73e-10	6.22e-10	CYP4F29P	2.05438	0.323072	-2.66877	9.16e-18	7.07e-17
		SLC22A24	PLSCR4	SOX1	PRDX1P1		AGR2	2.42386	9.20465	4.59551e-22	1.76687e-21	LCN6	-2.29698	-1.69401	5.59582e-50	5.80858e-49		MYBL2				CRABP1	SLC2A10									RF02246	0.458463	2.90673	2.66452	3.36e-16	2.22e-15	AC015813.4	0.607386	0.239444	-1.34293	1.75e-06	3.99e-06
		LINC01811	LINC01070	RP11-564D11.3	MUC19		HIST1H2BI	4.38813	-2.46884	4.80691e-22	1.84736e-21	GABRE	-2.32363	3.87295	9.6416e-50	9.93435e-49		PIMREG				CHRDL2	SEMA3F									CRABP1	18.7798	100.602	2.4214	2.24e-19	2.06e-18	SLC2A10	22.2192	7.73285	-1.52273	2.12e-31	8.85e-30
		MUC5AC	RP11-823E8.3	BVES-AS1	LINC01513		SCG2	2.82554	3.23622	6.10563e-22	2.33413e-21	ALX4	-2.34472	2.05979	2.15716e-49	2.20763e-48		GDF10				MAP7D2	CIDEC									CHRDL2	0.732644	2.83301	1.95115	6.23e-12	2.61e-11	SEMA3F	26.475	11.3521	-1.22167	1.81e-33	1.03e-31
		ZFP42	C14orf180	OR7A5	LRRC26		TMEM171	2.21314	-0.784669	6.12168e-22	2.33928e-21	RNF186	-3.06097	-1.41327	3.45584e-49	3.51096e-48		KCNB1				DAPP1	AC011503.1									MAP7D2	0.33911	1.38471	2.02976	1.66e-17	1.24e-16	CIDEC	4.48056	1.61042	-1.47624	0.00162543	0.0025469
		SOHLH1	ADIPOQ-AS1	PDX1	VTN		NKX2-2	5.57414	0.092344	6.90914e-22	2.63741e-21	PENK	-3.00384	1.3626	4.29952e-49	4.3559e-48		CTXN1				TP53BP2	SLC29A3									DAPP1	2.82396	6.0112	1.08993	8.34e-13	3.83e-12	AC011503.1	0.608867	0.0765914	-2.99087	0.00652855	0.00938628
		GCGR	ENPP2	RP11-352B15.2	CLGN		C6orf222	3.48029	-2.81464	7.39815e-22	2.82112e-21	AGMO	-2.07068	-0.391682	7.64075e-49	7.68946e-48		FAM107A				B3GNT5	MYL3									TP53BP2	9.88095	20.1689	1.02941	4.04e-20	4.04e-19	SLC29A3	10.6471	5.2681	-1.01511	4.28e-24	6.7e-23
		RP11-16O13.1	TUSC5	CTD-2104P17.1	AC106869.2		VIL1	3.53	-0.262238	7.6581e-22	2.91657e-21	DBX2	-2.01897	-1.47737	1.20967e-48	1.21268e-47		LRRC15				C9orf40	HPX									B3GNT5	0.743897	4.24258	2.51177	2.18e-45	1.38e-42	MYL3	0.30055	0.149696	-1.00557	3.05e-09	9.52e-09
		OTP	F10	SCN5A	ABCA3		SERPINC1	2.28188	-0.957357	7.86814e-22	2.99531e-21	FFAR3	-2.12027	-3.35509	1.24281e-48	1.24315e-47		IBSP				GPR87	IRAIN									C9orf40	2.24228	4.93374	1.13771	1.07e-31	4.73e-30	HPX	8.77832	0.793947	-3.46683	3.71e-37	3.92e-35
		NXPH1	PRRT4	RP11-650L12.2	RP11-723O4.6		KRT75	4.23894	0.944387	7.88241e-22	3.00011e-21	NRG1	-2.14476	2.99718	1.66616e-48	1.66022e-47		KCNA2				MYBL1	RTN4RL1									GPR87	0.856219	3.62607	2.08236	2.51e-05	5.01e-05	IRAIN	1.52693	0.402827	-1.9224	1.07e-06	2.51e-06
		POU4F3	CPA1	NKX1-2	LINC00922		NBPF6	3.10881	0.58827	9.67358e-22	3.66876e-21	SFRP1	-2.53857	8.04267	4.74199e-48	4.67124e-47		MMP13				CHST9	MMEL1									MYBL1	2.46716	5.39559	1.12893	2.24e-05	4.5e-05	RTN4RL1	9.17707	3.14851	-1.54337	9.37e-27	2.01e-25
		RP11-844P9.5	DTX1	BMP6	SFXN2		F2	4.01186	-1.90908	1.022e-21	3.87278e-21	FGFBP2	-2.72272	1.46468	2.70673e-47	2.59592e-46		CTHRC1				SPRR1B	AGBL2									CHST9	0.221621	0.540169	1.28532	4.91e-06	1.07e-05	MMEL1	1.11208	0.494091	-1.17041	3.54e-20	3.56e-19
		HSD3B2	SRPX	CLDN6	CRIP1P2		IL12B	2.0973	-1.47607	1.09208e-21	4.13485e-21	ART1	-2.92641	-2.67797	5.51569e-47	5.25104e-46		CLSPN				LINC01819	HRASLS5									SPRR1B	1.74198	4.94605	1.50555	4.15e-09	1.28e-08	AGBL2	0.386829	0.165916	-1.22124	2.09e-18	1.72e-17
		RP11-284F21.9	GNG2	S100A8	FAM135B		OTOR	3.09417	-1.29539	1.10312e-21	4.17581e-21	PTGFR	-2.08263	2.04319	7.1779e-46	6.63517e-45		CNIH2				CYB5R2	RNA5SP160									LINC01819	0.532872	5.78168	3.43963	2.47e-24	3.97e-23	HRASLS5	4.18233	1.50408	-1.47543	8.16e-08	2.17e-07
		NT5CP2	LINC01485	C3orf30	AKAP5		C1orf105	4.07632	-1.17551	1.11567e-21	4.22244e-21	CADM3	-2.2029	2.32299	1.82262e-45	1.66614e-44		TTK				AC115522.1	RARA									CYB5R2	1.6039	4.39428	1.45405	2.79e-21	3.17e-20	RNA5SP160	0.47609	0.155017	-1.61881	1.47e-10	5.32e-10
		HYPM	MEOX2-AS1	TFF2	GAS2L1P1		SSTR2	2.04647	4.18787	1.22794e-21	4.64153e-21	CPA2	-2.35182	-2.49919	5.25529e-45	4.74912e-44		KIF26B				OSR1	CFAP99									AC115522.1	0.525624	2.09513	1.99494	1.14e-12	5.17e-12	RARA	31.4806	9.37573	-1.74746	1.9e-43	8.69e-41
		LINC01287	PCK1	KCNH8	RP11-284J1.1		PRSS2	4.50415	1.59905	1.32453e-21	4.99934e-21	MYBPH	-2.23885	-0.986136	7.18758e-45	6.47596e-44		RBFOX1				TMEM139	SH3BGRL									OSR1	1.05642	4.46959	2.08096	8.41e-12	3.48e-11	CFAP99	0.236498	0.0381584	-2.63176	5.29e-39	7.76e-37
		RP11-156L14.1	CABP1	C1orf106	TRPA1		C4orf50	2.29663	-2.3271	1.51652e-21	5.71332e-21	FAT2	-2.19132	4.10818	1.46893e-44	1.30536e-43		JPT1				LTA	ROCK1P1									TMEM139	3.58522	10.7983	1.59067	5.78e-08	1.57e-07	SH3BGRL	169.286	52.4939	-1.68924	7.05e-28	1.8e-26
		SLURP1	ANXA1	CTD-3035K23.6	USP35		GNG4	2.81618	3.47984	1.9328e-21	7.23954e-21	CCL21	-2.35575	4.1587	1.81407e-44	1.60734e-43		KCNE1B				SRSF12	F2RL2									LTA	0.559027	1.21933	1.1251	9.53e-10	3.16e-09	ROCK1P1	1.32708	0.585715	-1.17999	0.000628245	0.00104306
		RP11-626A5.2	RP1-193H18.3	PCSK9	SNX19P3		SEZ6L	3.52422	3.44384	2.10314e-21	7.87106e-21	RPE65	-2.6235	-2.68687	2.04347e-44	1.80883e-43		FAM47E-STBD1				DNMT3B	CLCNKA									SRSF12	0.143702	1.28136	3.15652	7.17e-41	1.67e-38	F2RL2	11.0507	4.19343	-1.39794	1.12e-16	7.77e-16
		LINC00518	SLIT3	RP11-816J8.1	RP3-326I13.1		TNIP3	2.18401	-0.230989	2.65056e-21	9.87905e-21	INMT-MINDY4	-2.35378	-4.2916	3.31176e-44	2.91021e-43		TMTC1				ZBED2	WDR93									DNMT3B	1.97791	4.11471	1.05682	2.61e-21	2.98e-20	CLCNKA	0.273538	0.127634	-1.09972	3.74e-11	1.44e-10
		KLHL1	TYRO3	LINC00968	SLC22A10		KIAA0319	2.43154	0.802916	2.6681e-21	9.94238e-21	CAPZA3	-2.77075	-2.87427	5.14461e-44	4.49689e-43		C1QTNF7				TRIM47	AC103760.1									ZBED2	0.455667	1.06719	1.22777	6.4e-12	2.68e-11	WDR93	0.632652	0.237026	-1.41637	1.31e-22	1.72e-21
		RP4-781K5.5	GPLD1	MAST1	PEBP4		STMND1	2.37375	3.44569	2.6999e-21	1.00588e-20	CHST9	-2.35491	2.13913	5.67802e-44	4.95122e-43		MRGPRX2				CLEC17A	LAMP5									TRIM47	12.3032	26.4965	1.10677	3.78e-22	4.69e-21	AC103760.1	2.62429	0.512887	-2.35522	7.22e-41	1.67e-38
		RP11-1157N2__B.2	RP11-451G4.2	CXCL11	GRIA2		SPANXB1	6.95228	-0.0775553	2.98155e-21	1.10968e-20	ADGRL3	-2.01848	2.0954	9.85078e-44	8.50408e-43		CTNNA3				PDE1C	PGR									CLEC17A	0.223429	0.478574	1.09892	0.013188	0.0180543	LAMP5	8.79647	2.76314	-1.67062	1.5e-25	2.8e-24
		UCA1	TRHDE	RP11-213H15.1	RP11-37C7.3		POU3F2	4.11585	-0.353524	3.45022e-21	1.28122e-20	DCT	-2.53952	-0.373044	1.30957e-43	1.12839e-42		SMIM10L2A				TRABD2A	AC098935.1									PDE1C	0.234403	0.68825	1.55394	9.23e-06	1.94e-05	PGR	11.8831	0.53608	-4.47032	8.88e-37	8.81e-35
		AP004289.1	YIPF7	RPSAP71	MIEN1		HIST2H3D	2.3556	-2.47239	3.93366e-21	1.45687e-20	SLC16A12	-2.18458	0.100049	1.7569e-43	1.50669e-42		HTR2A				CDC20	TCAP									TRABD2A	0.194942	0.459186	1.23604	1.58e-09	5.11e-09	AC098935.1	1.0764	0.521206	-1.04628	1.79e-10	6.43e-10
		POTEI	SCN4B	AP000998.2	RAB19		TUBA3E	3.05323	0.887078	4.03005e-21	1.49135e-20	MYBPC1	-3.24592	6.46397	2.80009e-42	2.33405e-41		AGBL1				NRTN	MEGF9									CDC20	15.3671	50.2819	1.71019	1.61e-35	1.24e-33	TCAP	1.33164	0.388436	-1.77746	0.00263491	0.00400706
		CTC-458A3.1	MYH11	WFDC21P	EMX1		MAGEA12	7.99816	0.871681	4.60882e-21	1.70102e-20	METTL21C	-2.91553	-3.83522	1.91393e-41	1.56732e-40		TRIP13				ZNF571-AS1	ENPP5									NRTN	0.795073	4.42428	2.47629	3.95e-24	6.22e-23	MEGF9	16.3108	6.12599	-1.41281	2.11e-30	7.46e-29
		PLA2G2F	VWF	DUX4L9	LINC01341		A2ML1	3.514	3.86926	5.04035e-21	1.85651e-20	C2CD4B	-2.05222	1.19631	2.69245e-41	2.19101e-40		CRB2				SERPINB5	SSTR2									ZNF571-AS1	0.252478	0.928948	1.87944	5.12e-11	1.95e-10	ENPP5	16.0205	4.67282	-1.77755	1.17e-16	8.09e-16
		MAPT-IT1	RP11-561I11.3	LHX3	RP11-260E18.1		AC020636.2	3.12284	-2.96123	5.14623e-21	1.89359e-20	MRLN	-3.01735	-3.39749	3.91129e-41	3.16301e-40		MAD2L1				P3H2	CFAP45									SERPINB5	4.65729	23.0425	2.30673	5.92e-21	6.48e-20	SSTR2	2.74729	0.575477	-2.25518	3.1e-13	1.5e-12
		LINC01592	TBX15	CHAC1	RP5-1184F4.7		ZDHHC22	4.4993	-0.47255	5.57118e-21	2.04622e-20	SGCG	-2.61954	1.31285	5.57724e-41	4.48625e-40		C2orf88				TUBB3	NKX3-1									P3H2	1.19072	3.40519	1.51589	0.0197466	0.0263234	CFAP45	2.87444	1.0139	-1.50337	5.12e-23	7.06e-22
		ARL14	JAM2	ANGPT1	MUC2		PYY	2.65324	0.175166	5.95829e-21	2.18575e-20	PLCXD3	-2.19979	1.00232	8.29075e-41	6.64541e-40		KPNA2				MKRN3	LINC00908									TUBB3	0.764702	1.91915	1.3275	7.4e-11	2.77e-10	NKX3-1	7.57133	2.38341	-1.66752	1.12e-05	2.33e-05
		TRIML2	KLHL29	RP11-796E2.4	RP11-96C23.13		MSLN	3.91296	4.80612	6.00908e-21	2.20349e-20	HAS1	-2.24485	0.567132	8.69148e-41	6.96047e-40		DACT2				CRHR1	TRIM72									MKRN3	0.170082	0.707223	2.05594	2.92e-23	4.16e-22	LINC00908	0.316188	0.0417394	-2.9213	1.52e-22	1.98e-21
		WASF5P	NAT8L	CECR7	CARTPT		LGALS9C	2.51785	-0.886931	6.23483e-21	2.28443e-20	HRASLS5	-2.14703	4.07631	1.84825e-40	1.45955e-39		KIF18A				EPHX3	IDSP1									CRHR1	0.263409	1.86095	2.82066	3.79e-11	1.46e-10	TRIM72	0.404111	0.0363855	-3.47332	9.33e-06	1.96e-05
		TDRG1	FAM228A	FIGLA	MROH4P		NUPR2	2.00374	1.99342	6.24988e-21	2.28948e-20	TEX26	-2.62434	-3.57312	2.16258e-40	1.70406e-39		SCN5A				LAIR2	THSD4									EPHX3	0.450894	2.7378	2.60216	6.04e-12	2.54e-11	IDSP1	0.387351	0.179528	-1.10944	6.51e-05	0.000123393
		KRT18P29	ABCC9	CTC-573N18.1	RP11-213G21.2		CACNA1B	2.62385	0.239848	6.27097e-21	2.29674e-20	ITIH2	-2.31095	0.979088	2.49174e-40	1.95749e-39		EME1				FAM72B	LGALS8									LAIR2	0.300084	0.924328	1.62304	1.19e-09	3.9e-09	THSD4	11.4101	1.10252	-3.37143	2e-47	2.46e-44
		SYT9	ANKRD2	AC012512.1	KRT18P8		GATA4	5.15829	0.708063	6.35846e-21	2.32832e-20	GABRG1	-2.34896	-3.35094	2.8852e-40	2.26365e-39		FN1				CD300E	AC087257.2									FAM72B	0.344793	0.939559	1.44625	4.02e-24	6.32e-23	LGALS8	14.7261	6.84253	-1.10578	3.27e-32	1.58e-30
		LHX3	CCL14	RP11-154D17.1	ARHGAP42P2		DLL3	2.77872	-0.473341	6.85158e-21	2.50686e-20	OR2L13	-2.39428	-2.58842	4.72511e-40	3.677e-39		CLEC5A				GSDMC	CYP21A1P									CD300E	0.478126	1.30713	1.45094	1.36e-16	9.34e-16	AC087257.2	0.379429	0.135753	-1.48285	1.97e-05	3.98e-05
		CYP19A1	FAM196B	ZNF280A	FBXL16		WDR38	2.88327	-1.29094	6.9388e-21	2.53826e-20	MAS1L	-2.18462	-3.00844	5.0329e-40	3.91316e-39		PACSIN1				SLC38A3	CFAP57									GSDMC	0.91783	3.9734	2.11408	4.39e-26	8.78e-25	CYP21A1P	2.28187	0.50342	-2.18038	2.75e-23	3.92e-22
		RP5-984P4.6	COL6A6	NPY4R	RND1		KRT1	5.50063	4.24245	7.63512e-21	2.7868e-20	C10orf90	-2.43011	0.455273	5.19881e-40	4.0387e-39		GSTM5				WFDC1	HMGN2P15									SLC38A3	0.972639	5.14296	2.40262	3.03e-11	1.18e-10	CFAP57	0.591234	0.111344	-2.40871	2.92e-36	2.59e-34
		CLRN1	TMEM246	KCNG1	AC018804.3		ERVV-2	4.98016	-1.82255	7.81126e-21	2.84938e-20	MYOG	-3.24258	-1.93008	8.62082e-40	6.65155e-39		PLAC1				LINC01018	AC127521.1									WFDC1	0.2664	0.689127	1.37117	0.0116563	0.0161008	HMGN2P15	6.30196	2.03923	-1.62777	3.94e-17	2.86e-16
		TRIM67	LILRB5	GJB6	ENTPD8		SBK2	4.03123	-1.9354	8.73269e-21	3.17529e-20	MYF6	-4.1254	-0.617788	9.51624e-40	7.32997e-39		HMGB3				LOXL4	FOXI2									LINC01018	0.144102	0.749	2.37788	2.9e-05	5.74e-05	AC127521.1	1.54394	0.698835	-1.14359	8.12e-11	3.02e-10
		NCCRP1	PRKAR2B	JPH2	RP11-349F21.5		HIST1H4A	4.23394	-2.68667	1.02441e-20	3.71741e-20	NOS1	-2.68281	-0.143732	1.0131e-39	7.79354e-39		IL6				CALB2	AC002064.2									LOXL4	1.63623	7.81597	2.25605	1.84e-18	1.53e-17	FOXI2	0.271453	0.134334	-1.01488	0.000512037	0.000860879
		LINC01863	ALDH1A1	RP11-845M18.6	RP1-63M2.7		SALL3	3.22918	-2.13266	1.10535e-20	4.00312e-20	BMPER	-2.03907	1.35188	1.60273e-39	1.22413e-38		CLCA4				SLC4A11	CAPN8									CALB2	4.57561	32.2412	2.81687	1.1e-16	7.64e-16	AC002064.2	0.905605	0.252572	-1.84219	1.22e-17	9.3e-17
		CALY	CEBPA	PNPLA1	CRP		MGAT5B	2.20791	1.7027	1.13637e-20	4.11219e-20	SHOX	-2.15214	-3.5759	2.20027e-39	1.67277e-38		CYP26B1				CIB2	CFAP43									SLC4A11	1.99939	6.495	1.69977	5.08e-13	2.39e-12	CAPN8	8.60244	0.932879	-3.20498	3.76e-38	4.65e-36
		UNC93A	DES	KIT	RP11-19J5.2		S100A8	3.56878	6.26561	1.25686e-20	4.53823e-20	TRPM1	-2.14604	-3.29102	2.52423e-39	1.91027e-38		AL096711.2				NDRG1	CST5									CIB2	1.93623	5.10568	1.39885	2.44e-23	3.51e-22	CFAP43	0.732059	0.219954	-1.73476	1.57e-27	3.84e-26
		HIST1H2APS4	KLHL40	FTCD	CRIP1P4		CNGA2	5.38951	-1.31818	1.28827e-20	4.64705e-20	MYOC	-3.60782	2.33909	7.02462e-39	5.2353e-38		C6				KIF20A	ANKRD24									NDRG1	24.5954	60.9318	1.30881	1.56e-18	1.3e-17	CST5	17.5613	0.0229423	-9.58018	8.79e-25	1.49e-23
		TCHHL1	TSLP	CR1L	TMEM82		TUBA4B	2.99931	-1.15709	1.3147e-20	4.73863e-20	KCNA1	-2.09854	-0.216139	1.37193e-38	1.01497e-37		IQSEC3				CASC9	LINC02544									KIF20A	7.03863	14.4143	1.03413	1.68e-19	1.57e-18	ANKRD24	0.557556	0.205897	-1.43719	1.21e-18	1.02e-17
		ASZ1	MAOA	CTD-2008P7.8	SEMA6D		HIST1H2BB	4.17852	-2.73872	1.33067e-20	4.79426e-20	ASTN1	-2.00023	0.765493	2.03304e-38	1.49432e-37		MCM10				IGHG2	FRMPD3									CASC9	0.212777	0.627097	1.55935	6.07e-05	0.00011552	LINC02544	5.7539	2.75189	-1.06412	1.26e-11	5.11e-11
		MIR554	FMO2	FUT5	PTPRQ		HORMAD1	4.13885	1.89905	1.43961e-20	5.17956e-20	ACTC1	-2.49525	0.0800678	3.65588e-38	2.66663e-37		TP63				TM4SF1-AS1	MSI2									IGHG2	185.018	617.552	1.73889	4.5e-07	1.1e-06	FRMPD3	0.616962	0.303079	-1.02549	5.84e-07	1.41e-06
		RP11-284G10.1	MYH7	LYPD1	FGF7P1		SLC8A2	2.64751	0.88555	1.67855e-20	6.02015e-20	CLDN8	-2.09991	3.8581	3.71917e-37	2.61712e-36		ARHGAP11A				WIF1	SCUBE1									TM4SF1-AS1	1.08858	3.59703	1.72436	9.67e-08	2.55e-07	MSI2	7.35866	3.21397	-1.19509	6.38e-31	2.42e-29
		RP5-884M6.1	MMRN1	ADAD2	PRSS30P		SERPINA9	2.61251	0.148577	1.70419e-20	6.1097e-20	GMNC	-2.9837	-3.85139	5.45031e-37	3.80725e-36		C10orf142				AL023803.2	CFAP53									WIF1	1.53768	3.79661	1.30396	1.54e-05	3.17e-05	SCUBE1	1.13231	0.191076	-2.56705	9.83e-19	8.39e-18
		DMRT1	SMYD1	RP11-357H14.17	CERS6-AS1		GPR26	4.61476	2.34599	1.79158e-20	6.41413e-20	IL17B	-2.05445	0.351812	4.36509e-36	2.95812e-35		ABI3BP				ZIC1	FBP1									AL023803.2	0.292258	0.619306	1.08341	5.35e-15	3.1e-14	CFAP53	1.77947	0.819801	-1.1181	3.94e-20	3.94e-19
		NDST4	PGM5P4-AS1	MGAT3-AS1	PGGHG		LRG1	2.09828	5.61088	1.98991e-20	7.10737e-20	PLPPR1	-2.25667	-0.411101	5.20872e-36	3.51933e-35		PTH1R				AL031651.2	RAB17									ZIC1	0.299035	2.27601	2.92812	1.97e-29	6.02e-28	FBP1	62.0297	14.4208	-2.10481	3.53e-40	7.14e-38
		KIRREL2	KCNIP2-AS1	RP11-489D6.2	VWA3A		LGALS9B	2.82915	-1.12201	2.04964e-20	7.31497e-20	OR10A3	-2.49643	-4.16901	6.12921e-36	4.12744e-35		HSD11B1				BARX1	CLGN									AL031651.2	0.392139	1.54175	1.97513	2.4e-14	1.3e-13	RAB17	7.16995	2.52715	-1.50445	9.26e-37	9.11e-35
		CYP2T3P	MB	LINC00634	RNY1		DRC7	2.44096	-1.58074	2.26634e-20	8.07407e-20	SLC14A2	-2.04974	0.483391	9.35489e-36	6.25785e-35		SBK1				KRT75	RDH16									BARX1	0.362066	3.86956	3.41784	1.69e-12	7.53e-12	CLGN	8.7654	2.17937	-2.00791	2.58e-23	3.7e-22
		HRH3	FREM1	HBQ1	LINC00243		GPR158	2.43249	1.47057	2.75382e-20	9.7743e-20	NPY2R	-3.52329	1.30801	1.04924e-35	7.00327e-35		BMP8A				MGAM2	FOXJ1									KRT75	0.387496	3.39001	3.12904	1.53e-07	3.94e-07	RDH16	1.16551	0.384298	-1.60066	8.81e-09	2.61e-08
		KCNMB2-AS1	DENND2A	KRT16	CYP2T3P		GAL	2.59047	1.83148	2.85892e-20	1.01414e-19	SLC27A6	-2.05043	2.12982	2.16383e-34	1.38716e-33		NTRK2				TMEM52	AC005736.1									MGAM2	0.128274	1.65521	3.68971	2.79e-14	1.5e-13	FOXJ1	3.13574	0.995734	-1.65497	2.78e-11	1.09e-10
		LINC01293	PREX2	TUBB4A	DOC2A		FAM83A	2.8968	3.08737	3.11419e-20	1.10361e-19	SCGB1A1	-3.69829	-0.536746	1.08779e-33	6.84063e-33		TLCD1				RPS2P32	GPRC5C									TMEM52	1.21947	2.89853	1.24907	9.53e-07	2.25e-06	AC005736.1	0.281204	0.127488	-1.14125	9.08e-25	1.53e-23
		TRPM8	MESTIT1	FSD1	RIMS1		LHX1	5.92229	0.112188	3.1487e-20	1.11519e-19	AQP4	-2.24424	0.968295	3.82045e-33	2.35279e-32		TPRN				KRT77	C9orf116									RPS2P32	0.326745	1.10632	1.75954	2.3e-22	2.94e-21	GPRC5C	6.54597	3.24073	-1.01429	1.67e-19	1.55e-18
		RP11-556O9.2	RP11-64C12.8	RPE65	CEACAM5		CDH7	3.49256	1.04766	3.30937e-20	1.17118e-19	NLGN1	-2.05615	0.436888	4.84568e-33	2.97007e-32		FAM111B				LINP1	UGDH									KRT77	0.15695	1.41294	3.17033	2.97e-08	8.31e-08	C9orf116	5.8676	1.65918	-1.8223	1.37e-37	1.51e-35
		RNU5B-1	PID1	ETV3L	RP11-467K18.2		PAX1	2.90507	0.0561167	3.53384e-20	1.24916e-19	CALB2	-2.0246	4.31354	4.92278e-33	3.01529e-32		E2F7				SKA1	CCDC160									LINP1	0.193075	2.65367	3.78075	2.7e-21	3.08e-20	UGDH	41.3866	14.1219	-1.55123	1.71e-28	4.72e-27
		RP11-354P11.2	SCTR	MSLN	ADAM33		SBSN	4.67091	2.64013	3.75137e-20	1.32476e-19	TPPP2	-2.16465	-2.8982	2.60851e-32	1.55628e-31		TONSL				FCRLA	KIF13B									SKA1	2.41107	6.01442	1.31875	5.03e-25	8.77e-24	CCDC160	3.54208	1.56293	-1.18034	8.09e-15	4.59e-14
		TBX10	MRAS	SIRPAP1	RP11-115D7.3		NEU4	2.99451	-0.0946643	3.8024e-20	1.342e-19	C11orf87	-2.22067	-2.94795	2.7631e-32	1.64634e-31		P4HA3				AC112907.2	AR									FCRLA	0.524467	1.4262	1.44325	3.45e-06	7.63e-06	KIF13B	9.32769	3.22206	-1.53354	8.02e-26	1.55e-24
		COL11A2	HSD52	OSTN	HSH2D		AARD	2.16704	5.90581	4.06813e-20	1.43245e-19	CYP1A2	-2.21639	-4.15077	3.33485e-32	1.983e-31		PHYHIP				PTGS2	AL138878.2									AC112907.2	0.784613	1.85592	1.24209	4.04e-17	2.92e-16	AR	18.6278	5.13256	-1.85971	8.69e-33	4.52e-31
		PAGE5	FSD2	RP4-799P18.2	NDST4		POTEC	5.88287	0.123719	4.31693e-20	1.5174e-19	MOGAT1	-2.2274	-3.04259	7.90449e-32	4.60989e-31		COL17A1				IGHV3-62	AC129507.4									PTGS2	0.617954	6.43364	3.38006	6.6e-10	2.22e-09	AL138878.2	0.561124	0.0324572	-4.11171	8.08e-34	4.91e-32
		LINC01953	MAB21L1	KRT75	C20orf85		SLC1A1	2.27453	5.58678	5.35784e-20	1.87711e-19	SLC4A1	-2.02386	-2.96349	5.14363e-31	2.90369e-30		CENPI				IGKV1OR2-11	LINC01645									IGHV3-62	0.515182	2.10831	2.03293	0.00321803	0.00483257	AC129507.4	0.998465	0.223889	-2.15693	6.73e-13	3.12e-12
		CNGA3	CCDC178	RP11-110H1.8	CYP19A1		GCNT3	2.83264	0.723618	5.72304e-20	2.00196e-19	AADAC	-2.89383	0.280425	8.62055e-31	4.83044e-30		ASB2				EPHB3	AMBP									IGKV1OR2-11	0.190564	0.654422	1.77994	0.000664062	0.0010991	LINC01645	0.224177	0.0758325	-1.56375	0.000623594	0.00103578
		HIST2H2AA4	MLIP	HNRNPA1P40	HAR1B		ALG1L	2.14469	1.15681	6.31871e-20	2.20778e-19	GDA	-2.48918	-1.6778	1.20193e-30	6.70385e-30		TCEAL5				AC007249.2	MAGEB17									EPHB3	14.9932	52.3508	1.8039	6.49e-19	5.66e-18	AMBP	1.37417	0.170075	-3.01431	1.65e-26	3.44e-25
		MAGEC1	MICU3	PGLYRP3	PTGER3		ZP4	4.94139	-2.70249	6.38399e-20	2.2293e-19	PF4	-2.36463	-3.80842	1.25498e-30	6.99762e-30		SALL4				KRT6B	TANC2									AC007249.2	0.168577	0.376878	1.16069	9.94e-22	1.18e-20	MAGEB17	0.632027	0.0771236	-3.03474	2.33e-22	2.97e-21
		LINC01998	RP11-384P7.7	RP11-73M7.1	OR4K8P		HMX2	4.47984	-1.9092	7.15217e-20	2.49132e-19	HS3ST4	-2.73847	0.0854323	1.3192e-30	7.34438e-30		RELN				EFNA5	CACNG4									KRT6B	13.4848	66.8985	2.31064	9.1e-26	1.75e-24	TANC2	4.25626	1.87394	-1.18351	7.8e-22	9.39e-21
		RP11-506O24.2	GNAL	LINC01625	SNORD104		MUC5B	2.8797	6.56178	8.17456e-20	2.83982e-19	CHRND	-3.29708	-2.37824	1.1703e-29	6.28788e-29		STIL				NOP2	AL161908.1									EFNA5	3.37586	10.0404	1.57249	2.59e-18	2.11e-17	CACNG4	32.7685	7.48843	-2.12957	1.15e-25	2.19e-24
		PDX1	GGTA1P	ALG1L5P	KRT18P16		TMEM82	3.84849	-2.26508	8.4435e-20	2.93101e-19	SGCZ	-2.61041	-3.59807	5.41829e-29	2.83729e-28		MND1				SLC22A20P	HRC									NOP2	9.42876	19.1111	1.01927	7.01e-22	8.48e-21	AL161908.1	2.95911	0.872001	-1.76276	3.37e-29	1.01e-27
		LINC00524	ALDH1A2	SCRT2	ATP8B3		HIST1H2AH	3.55183	-1.99619	1.21835e-19	4.20517e-19	TF	-2.14845	5.06041	7.48971e-29	3.8995e-28		ATF3				IGKV1-5	MEIS3P2									SLC22A20P	0.157073	0.544691	1.794	3.1e-12	1.34e-11	HRC	0.559485	0.218677	-1.3553	3.7e-20	3.71e-19
		CEACAM7	HRC	ZNF560	RP11-532F6.5		RXFP3	2.00429	-3.75927	1.21984e-19	4.20952e-19	BBOX1	-2.03618	3.14647	1.32775e-28	6.82872e-28		GPC3				S100A4	AC103858.2									IGKV1-5	141.365	416.067	1.55739	7.84e-06	1.66e-05	MEIS3P2	1.6236	0.287941	-2.49535	1.23e-25	2.32e-24
		S100G	AC002066.1	C10orf91	REM2		INA	3.80236	0.559805	1.34623e-19	4.63596e-19	SAA4	-2.00751	-1.1289	3.13398e-28	1.59153e-27		MYL1				AC005082.1	CRIP1									S100A4	65.8677	140.757	1.09556	1.09e-10	4.01e-10	AC103858.2	0.25044	0.0968503	-1.37063	1.31e-12	5.89e-12
		RP11-118E18.4	EGFEM1P	MYBL1	KLHL41		VMO1	2.06875	1.99633	1.3638e-19	4.69115e-19	KCNA4	-2.67013	-2.75633	4.6278e-28	2.33318e-27		FAM189A2				C5orf46	CCNG2									AC005082.1	0.248152	0.672949	1.43927	3.26e-08	9.08e-08	CRIP1	4.25554	1.44154	-1.56173	5.85e-26	1.15e-24
		RP11-143E21.3	AVPR2	NCAM1	AC078882.1		ASCL1	5.20512	2.60458	1.38066e-19	4.74822e-19	SPHKAP	-2.69889	0.28512	2.84475e-27	1.38462e-26		PROC				CD70	LINC00578									C5orf46	2.19342	8.84071	2.01098	2.1e-16	1.41e-15	CCNG2	20.3776	8.54951	-1.25307	1.63e-32	8.17e-31
		ADAM18	HSPB2	LINC00393	BFSP2-AS1		NPHS1	2.65196	-1.45758	1.45207e-19	4.98626e-19	AADACL3	-3.01068	-3.7498	6.6001e-27	3.15328e-26		CLEC4G				MIR4538	AC092801.1									CD70	0.412803	1.06813	1.37157	5.92e-09	1.79e-08	LINC00578	1.85747	0.49595	-1.90507	9.42e-10	3.12e-09
		AC009227.2	KL	CBX2	RP11-428L9.1		TLX2	2.0987	-2.3449	1.45789e-19	5.0053e-19	PIGR	-2.27284	6.52111	3.33362e-26	1.55065e-25		EPHB1				KRT14	AL133297.1									MIR4538	0.472837	1.43989	1.60655	2.49e-06	5.6e-06	AC092801.1	0.59935	0.143134	-2.06603	6.1e-18	4.79e-17
		RP11-108K3.1	AP001627.1	GLP2R	RP11-903H12.5		MT1H	3.09127	-0.698303	1.71736e-19	5.87059e-19	TMEFF2	-2.14362	-3.04868	9.91601e-26	4.5187e-25		CDCA2				AC104971.3	FAM169A									KRT14	54.3864	182.547	1.74695	8.61e-05	0.000160626	AL133297.1	0.479542	0.204251	-1.23131	6.66e-21	7.27e-20
		AP004290.1	LINC01140	RP11-66H6.4	RP11-354P11.4		KRT2	3.39266	-1.64721	1.73041e-19	5.91407e-19	MRGPRX3	-2.14241	-0.803943	1.17051e-25	5.31663e-25		RAD51AP1				BTN1A1	ALB									AC104971.3	0.179626	0.370666	1.04512	0.00341486	0.00510981	FAM169A	0.612195	0.269064	-1.18604	7.08e-07	1.7e-06
		RN7SL664P	ABCB5	RP11-731K22.1	RP11-19J5.1		PGLYRP4	3.81458	-0.837698	1.81347e-19	6.19002e-19	LHCGR	-2.78544	-1.38418	1.33219e-25	6.02687e-25		RAB26				LMO4	AC010168.2									BTN1A1	0.695797	3.06459	2.13896	3.03e-10	1.06e-09	ALB	24.1872	0.675603	-5.16193	0.000153314	0.000276429
		MIR149	SYNPO2	SLCO1B3	RP11-174G6.5		GABRA3	4.471	0.175086	1.85671e-19	6.33381e-19	MYOD1	-3.46886	-2.94713	1.89481e-25	8.50652e-25		GPR17				AL645608.7	AP001486.2									LMO4	9.19272	30.4176	1.72634	2.51e-27	5.93e-26	AC010168.2	1.91751	0.776014	-1.30508	1.52e-14	8.41e-14
		RP6-24A23.7	KY	SOX14	RP11-349F21.3		IL17C	2.62617	-3.04185	1.92367e-19	6.55849e-19	SLCO1A2	-2.43578	0.207569	6.97258e-25	3.0525e-24		SCN3B				INAVA	ORMDL3									AL645608.7	0.891283	2.20937	1.30968	9.24e-05	0.00017177	AP001486.2	1.04235	0.480934	-1.11593	7.05e-24	1.07e-22
		RP11-145E17.2	ASB5	TLR8-AS1	FCRLB		ACOD1	3.05946	-3.37176	2.02348e-19	6.88977e-19	OSTN	-2.42603	-3.61855	7.99378e-25	3.48947e-24		RNFT2				SHC3	RN7SKP275									INAVA	1.6635	5.58601	1.7476	5.78e-29	1.67e-27	ORMDL3	59.9361	20.3183	-1.56064	8.78e-25	1.49e-23
		CTD-2591A6.2	SOX17	RP11-598F7.4	ETNK2		CDK5R2	4.84393	-0.298462	2.08025e-19	7.07642e-19	EDN3	-2.40327	1.80069	4.14991e-24	1.75417e-23		FBXO43				HASPIN	IL20RA									SHC3	0.261661	0.568422	1.11926	0.00010193	0.000188323	RN7SKP275	0.315884	0.0278062	-3.50592	1.64e-21	1.9e-20
		CSAG4	CLIC5	LINC02097	MYH2		PCSK1N	2.94292	2.23804	2.21757e-19	7.53226e-19	FABP9	-2.81187	-4.18522	6.2753e-24	2.63417e-23		GRIN2B				AC010536.2	AC006449.5									HASPIN	0.964018	2.04232	1.08308	2.81e-21	3.18e-20	IL20RA	5.17033	2.12968	-1.27962	6.04e-13	2.81e-12
		RP11-575M22.1	RBPMS-AS1	HOXA11	AC106900.6		FCRL4	2.32144	-2.32706	2.27593e-19	7.72471e-19	CDH12	-2.31169	-0.741538	1.84664e-23	7.57473e-23		C2orf40				KLHDC7B	AC018816.1									AC010536.2	0.266302	0.556361	1.06295	3.85e-05	7.51e-05	AC006449.5	1.09846	0.44824	-1.29313	2e-16	1.35e-15
		LINC00668	MEOX2	COLGALT2	ACSM5		FAM71F1	2.00248	-2.18171	2.68902e-19	9.09449e-19	CCL24	-2.08359	-1.82165	2.66895e-23	1.0857e-22		CCDC78				MAGEA4	AC132008.1									KLHDC7B	3.61852	21.2888	2.55662	1.51e-14	8.34e-14	AC018816.1	6.64415	0.525227	-3.66107	1.66e-10	5.99e-10
		RP11-77A13.1	MGLL	HORMAD2	CLVS2		BFSP2	2.08816	-0.987341	2.96075e-19	1.0006e-18	KCNJ16	-2.30485	1.30595	5.83498e-23	2.33335e-22		CST1				AC108047.1	TUBA3D									MAGEA4	0.748641	5.19906	2.7959	1.85e-08	5.26e-08	AC132008.1	0.396988	0.172279	-1.20434	3.08e-13	1.48e-12
		RP11-527H14.4	AQP1	AC133785.1	LRFN2		CLEC6A	2.76208	-2.52008	3.27581e-19	1.10564e-18	ANKRD1	-2.01756	0.618139	1.06594e-22	4.21798e-22		PPDPFL				CHST3	AGR3									AC108047.1	0.333031	0.847732	1.34795	2.09e-23	3.02e-22	TUBA3D	4.67134	0.59892	-2.9634	3.78e-24	5.97e-23
		C5orf66-AS2	MYLK	RP6-191P20.4	EHMT2-AS1		TFF3	2.59829	8.06279	3.48202e-19	1.17393e-18	HSPB3	-3.31348	-2.11847	5.3412e-22	2.04879e-21		ADAM8				KIF19	SIAH2									CHST3	3.04007	7.91939	1.38128	7.74e-25	1.32e-23	AGR3	120.948	3.27572	-5.20643	6.62e-48	9.4e-45
		RP11-19J5.1	SLC22A12	LAD1	SMIM1		NKAIN4	2.1426	-1.24018	3.60029e-19	1.21335e-18	PGA5	-2.16305	-3.81048	5.57618e-21	2.04742e-20		HIST1H3H				LZTS3	RN7SL359P									KIF19	0.152421	0.698059	2.19529	1.11e-10	4.08e-10	SIAH2	49.4705	19.7481	-1.32485	6.41e-23	8.74e-22
		SLC24A5	PRG4	TMEM35A	RNA5SP299		HIST2H2AA3	2.61058	-4.12499	3.90357e-19	1.31434e-18	DUSP13	-2.0137	0.122759	2.29412e-20	8.16982e-20		AKR1C2				KLF5	CERS6									LZTS3	2.41579	6.49361	1.42653	6.12e-15	3.52e-14	RN7SL359P	0.551181	0.147577	-1.90106	2.71e-06	6.06e-06
		IL36RN	RP11-474O21.5	RP11-132A1.4	MYOG		MUC19	3.98962	2.88592	4.27023e-19	1.43487e-18	FEZF2	-2.58783	-3.42923	1.12218e-19	3.87838e-19		RHPN1				PNOC	CCDC78									KLF5	6.10877	18.9829	1.63575	3.29e-21	3.7e-20	CERS6	17.0228	6.02703	-1.49795	1.87e-33	1.07e-31
		LRRC31	ACTA2-AS1	CHST9	EPN3		PEX5L	2.75492	2.4511	4.27497e-19	1.4362e-18	PPBP	-2.04172	-2.84135	4.49075e-18	1.44326e-17		BMP2				DMRT3	AP000439.2									PNOC	0.322052	0.754477	1.22818	4.74e-05	9.15e-05	CCDC78	2.30904	0.840236	-1.45843	3.19e-14	1.7e-13
		KCNQ5-IT1	FOSB	CCL13	RP11-38H17.1		KCNF1	2.5318	3.12636	4.45984e-19	1.49775e-18	SLCO1B7	-3.22251	-2.03556	5.65657e-17	1.72307e-16		MMP27				MEIG1	AL163636.2									DMRT3	0.308244	0.953667	1.62941	4.78e-09	1.46e-08	AP000439.2	8.90686	0.162126	-5.77973	1.28e-41	3.61e-39
		SLC4A10	AC097724.3	RPS4XP5	CAPN13		DYDC1	3.00993	-3.13873	4.57287e-19	1.53486e-18	PAQR9	-2.33469	-4.08014	1.39477e-16	4.17442e-16		MFAP2				LGR5	ATRNL1									MEIG1	0.132657	0.806299	2.60362	7.46e-28	1.9e-26	AL163636.2	0.231426	0.0931209	-1.31338	1.15e-19	1.09e-18
		PMCHL2	EDNRB	RP11-775L16.1	LA16c-313D11.9		EIF4E1B	4.35934	-1.31939	5.1826e-19	1.73662e-18	NOTO	-2.1156	-3.49763	2.82329e-16	8.34259e-16		SQLE				PQLC2L	LONRF2									LGR5	0.323384	2.40291	2.89347	0.000475703	0.000803499	ATRNL1	1.3841	0.211889	-2.70757	1.21e-10	4.41e-10
		GFY	ADAM33	FOXI3	ACMSD		LIN28A	5.28068	0.560628	5.72195e-19	1.91417e-18	MS4A6E	-2.17019	-2.67002	3.71772e-16	1.09357e-15		OR2B6				IGHV3-63	LINC01489									PQLC2L	0.239504	0.68302	1.51188	9.83e-12	4.04e-11	LONRF2	3.30938	0.657367	-2.33179	7.49e-31	2.8e-29
		LINC01022	CAMK2A	CCNYL2	HAGHL		KRT3	3.18706	-2.95049	5.80649e-19	1.94138e-18	CACNG2	-2.22863	-2.98602	1.18112e-12	2.89109e-12		EPYC				PCAT6	PDGFD									IGHV3-63	0.60581	1.40055	1.20905	0.00278583	0.00422352	LINC01489	0.601629	0.120822	-2.31599	4.43e-19	3.92e-18
		KNOP1P5	AGAP11	APCDD1L	KRT18P38		NIPAL4	2.22615	0.267006	6.67557e-19	2.22662e-18	AC011604.2	-2.74893	-1.51766	3.33832e-12	7.98199e-12		AUNIP				ZNF667-AS1	SLC22A17									PCAT6	6.19189	13.7717	1.15326	2.18e-14	1.19e-13	PDGFD	6.21706	2.89204	-1.10414	2.61e-19	2.37e-18
		RP11-648L3.2	HAS3	RP11-298E9.5	LRP1B		ZBBX	2.94568	-1.4759	8.45186e-19	2.80621e-18	SULT1C3	-3.17078	2.21167	1.12846e-11	2.6242e-11		ORC6				AC104785.1	TPRN									ZNF667-AS1	2.59842	5.33954	1.03908	8.44e-19	7.25e-18	SLC22A17	9.11681	4.33523	-1.07242	5.31e-10	1.81e-09
		MIR7-3HG	CMYA5	RP11-541E12.1	CDH18		ZAN	2.33204	-1.40147	8.66893e-19	2.87618e-18	SFTPA1	-2.057	-1.72559	1.86348e-11	4.28571e-11		HOXA6				AC141557.2	GOLM1									AC104785.1	0.347761	0.780301	1.16593	6.38e-11	2.41e-10	TPRN	9.15606	4.09416	-1.16116	4.29e-27	9.73e-26
		FAM230C	RNF150	GAL	TOX3		TEX14	2.02568	2.25752	9.57004e-19	3.1682e-18	SPRR2F	-2.0359	-3.29272	1.12301e-10	2.4719e-10		RERGL				AC103740.2	PGM5									AC141557.2	0.247907	0.591807	1.25533	4.08e-06	8.95e-06	GOLM1	73.7134	36.001	-1.03389	1.93e-18	1.59e-17
		AC073325.1	NRN1	RP4-536B24.4	CDK2AP2P2		TMPRSS4	2.87305	3.06484	1.02628e-18	3.39383e-18	UGT2B28	-2.05849	2.8297	1.27098e-10	2.78847e-10		GRM8				RPL23AP49	AC115837.2									AC103740.2	0.242003	1.02952	2.08888	3.64e-12	1.56e-11	PGM5	1.18281	0.501719	-1.23727	5.83e-13	2.72e-12
		RN7SL546P	HBA1	SNX22	MGAM		ZIC2	2.92102	1.29037	1.03078e-18	3.40685e-18							SLC7A3				AL138724.1	AC016888.1									RPL23AP49	0.845286	2.4724	1.5484	9.96e-16	6.26e-15	AC115837.2	1.54347	0.0179237	-6.42816	1.91e-15	1.16e-14
		RP11-88I21.1	ADCYAP1R1	AC012456.4	PTH1R		HPDL	2.03122	1.41434	1.10013e-18	3.63142e-18							PITX1				CXCR2P1	BHLHE40									AL138724.1	0.457394	1.36556	1.57798	5.65e-33	3.01e-31	AC016888.1	8.56035	2.92067	-1.55137	5.35e-19	4.72e-18
		AF127577.8	C10orf10	SLC7A14	CYP21A1P		ROBO2	2.72185	3.66612	1.39444e-18	4.58706e-18							CCNE2				AL359504.2	C5orf63									CXCR2P1	1.02623	2.19293	1.0955	1.61e-05	3.29e-05	BHLHE40	138.953	56.5091	-1.29804	1.16e-32	5.92e-31
		APCS	VGLL2	CAMKV	SP7		PAX2	2.52961	1.02538	1.5216e-18	4.99813e-18							MYH6				IGLV3-10	TFF1									AL359504.2	0.212487	0.475272	1.16138	1.8e-13	8.9e-13	C5orf63	0.988403	0.471455	-1.06798	4.79e-22	5.89e-21
		CD177P1	B3GALT1	CTA-384D8.34	LINC02077		CLEC3A	5.72271	7.77445	1.67782e-18	5.50034e-18							CSF3				CX3CL1	EVL									IGLV3-10	29.0269	178.659	2.62175	0.000523974	0.000879736	TFF1	416.692	11.3971	-5.19224	4.08e-46	3.35e-43
		DSPP	RP11-238F2.1	RP11-244M2.1	KRT24		SNTN	2.7515	-1.11832	1.89349e-18	6.19729e-18							RGS2				CDH3	MIR2052HG									CX3CL1	9.25756	22.917	1.30772	8.15e-19	7.02e-18	EVL	30.887	8.24878	-1.90475	2.09e-32	1.04e-30
		KCNJ4	PKD1L2	ELAVL2	LA16c-381G6.1		LRRIQ4	2.14087	-1.44775	2.22462e-18	7.26403e-18							HIST1H2BD				FOSL1	PLEKHD1									CDH3	8.07469	35.3938	2.13202	5.54e-31	2.15e-29	MIR2052HG	0.300604	0.0196404	-3.93597	2.66e-13	1.29e-12
		FAM163B	FGF1	LINC01436	CTB-58E17.5		TUBA3C	4.73499	-1.63133	2.3811e-18	7.76242e-18							MYOCD				TNFRSF11A	AC092666.2									FOSL1	1.41802	5.83556	2.041	5.38e-27	1.21e-25	PLEKHD1	0.959784	0.124371	-2.94805	1.34e-32	6.85e-31
		RP11-775G23.1	MRGPRF-AS1	TACR1	GRIK4		GABBR2	3.76006	1.42686	2.46083e-18	8.01801e-18							CDC6				AC068580.2	CYP4F8									TNFRSF11A	0.842448	1.9454	1.20741	3.01e-12	1.3e-11	AC092666.2	0.279565	0.126968	-1.13872	2.31e-07	5.85e-07
		LPO	ARHGEF7-AS2	PRSS33	RP1-269M15.3		NAT16	3.31117	-2.74428	2.52851e-18	8.22966e-18							P2RX6				LAG3	AC092167.1									AC068580.2	0.132624	0.869432	2.71273	1.54e-13	7.68e-13	CYP4F8	2.47949	1.18396	-1.06642	7.04e-15	4.02e-14
		PNMT	SLC25A34	RP11-433O3.1	SCARNA5		OTOG	3.96962	-2.59494	2.99559e-18	9.71505e-18							MAPK10				DHDH	ZNF676									LAG3	1.62013	3.99515	1.30214	5.77e-11	2.18e-10	AC092167.1	0.375026	0.0549837	-2.76992	2.16e-25	3.92e-24
		MAGEA11	SMCO1	LAMB3	LINC01016		PGK2	3.41886	-3.89377	3.22332e-18	1.04406e-17							GRM4				FABP5	TAT									DHDH	0.828935	2.04562	1.30321	1.1e-09	3.62e-09	ZNF676	0.512003	0.245988	-1.05757	1.81e-09	5.79e-09
		OR1F1	SEL1L2	CPA2	GRIK1-AS1		ROS1	3.88575	0.484631	3.63345e-18	1.17334e-17							METTL11B				AP001830.1	ACOX2									FABP5	6.18673	16.6278	1.42635	4.23e-27	9.63e-26	TAT	15.17	2.73948	-2.46924	2.62e-07	6.59e-07
		AC012594.1	GXYLT1P6	KCNK9	PRSS29P		C16orf92	2.25391	-3.41826	3.69794e-18	1.19374e-17							CDT1				CD82	MS4A2									AP001830.1	0.583225	1.16967	1.00397	3.12e-17	2.28e-16	ACOX2	8.14077	1.41322	-2.52618	1.13e-32	5.81e-31
		NTSR1	ADH4	ORM2	TCEAL6		PAGE2	6.42848	-0.453149	3.75809e-18	1.21273e-17							CRYBG2				MYOZ1	FAM155A									CD82	15.2399	31.5757	1.05097	2.69e-20	2.75e-19	MS4A2	1.02668	0.213804	-2.26362	1.11e-26	2.36e-25
		RP11-135A1.3	PGM5	IL36RN	KAZALD1		TCL1B	4.88314	-2.07446	4.01148e-18	1.2922e-17							TP53AIP1				CD38	P4HTM									MYOZ1	0.74639	2.92695	1.97139	0.00110185	0.00176863	FAM155A	0.698622	0.225931	-1.62863	4.36e-12	1.86e-11
		RP11-349I1.2	DMRT2	CBS	HSPA8P15		SIX3	3.03746	1.57901	4.19699e-18	1.35052e-17							CYP1A1				LINC01143	FAAH2									CD38	0.764176	1.99921	1.38745	7e-14	3.62e-13	P4HTM	7.39502	2.76216	-1.42076	5.82e-40	1.07e-37
		ASH1L-IT1	GAS1RR	DNAH17-AS1	H2AFJ		UTS2	2.11835	-1.72082	4.23989e-18	1.36408e-17							SCT				KCNG1	AP003555.3									LINC01143	0.198532	1.11073	2.48407	1.06e-25	2.02e-24	FAAH2	9.23333	4.53547	-1.0256	7.47e-26	1.45e-24
		RP11-353N14.1	IGSF10	LINC01971	SBK2		AGR3	2.35074	6.79549	4.85556e-18	1.55884e-17							F12				AC006329.1	AP000560.1									KCNG1	0.533577	3.85504	2.85298	7.21e-30	2.38e-28	AP003555.3	0.394302	0.173587	-1.18364	1.7e-10	6.13e-10
		SVOP	ADGRD1	RP11-496D24.2	RNU6-342P		CYP2A7	5.23709	4.4635	5.39643e-18	1.72821e-17							HES6				FO393418.1	SMCO3									AC006329.1	2.60006	6.70781	1.36729	1.28e-10	4.65e-10	AP000560.1	0.227747	0.109526	-1.05616	7.67e-07	1.83e-06
		RP5-916O11.3	PER1	DCAF8L1	KRTAP3-3		H3.Y	4.26189	-3.18681	5.72485e-18	1.8308e-17							PROX1				SOD3	SCCPDH									FO393418.1	0.167968	0.44263	1.39791	6.6e-18	5.16e-17	SMCO3	1.11183	0.211677	-2.393	1.09e-13	5.49e-13
		LINC01105	RBMS3-AS3	HLA-G	ZDHHC22		DPYSL5	4.43526	1.1221	6.13605e-18	1.96058e-17							HOXA2				SMIM10L2B	PABPC5									SOD3	7.43859	17.6586	1.24727	4.2e-10	1.45e-09	SCCPDH	51.9824	19.4142	-1.42091	1.36e-31	5.92e-30
		RP11-260A9.6	NT5C1A	LINC01229	OR4K7P		ASIC5	3.60206	-3.71517	6.25857e-18	1.99832e-17							MMP1				DEK	SMIM6									SMIM10L2B	0.440664	1.05689	1.26207	1.66e-16	1.13e-15	PABPC5	0.513364	0.225618	-1.1861	1.12e-09	3.67e-09
		RNU1-88P	LRRC70	LINC00202-2	HSPB1		NETO1	2.12534	0.151522	6.47085e-18	2.06356e-17							CCL28				IGKV3D-11	IL6ST									DEK	27.9966	61.5929	1.13751	1.68e-23	2.45e-22	SMIM6	0.273063	0.0911169	-1.58344	4.94e-05	9.5e-05
		TEKT1	ANGPTL7	IRX6	KRT8P22		CREB3L3	3.29678	-1.85659	6.47375e-18	2.06405e-17							RGS6				DUOX1	QDPR									IGKV3D-11	2.38497	5.149	1.11032	0.000945814	0.00153129	IL6ST	76.8141	14.2358	-2.43185	5.48e-41	1.33e-38
		FER1L6-AS2	NDRG2	CTA-126B4.7	SLC14A2		TMEM132E	2.163	0.727024	6.69377e-18	2.13315e-17							TEPP				SULT1E1	INSYN2									DUOX1	1.01953	2.27108	1.15547	1.61e-06	3.71e-06	QDPR	29.0822	10.7369	-1.43755	1.16e-19	1.1e-18
		LVCAT1	SLC22A3	F11-AS1	LINC01605		CRP	6.37141	1.88203	6.84354e-18	2.17935e-17							E2F2				PFKP	KCNC2									SULT1E1	0.257682	0.933407	1.85692	6.22e-08	1.68e-07	INSYN2	3.76325	0.22208	-4.08283	4.05e-22	5.02e-21
		MC5R	MYH1	RP5-899B16.1	RP11-748H22.1		SHISA9	2.10098	3.13968	7.42683e-18	2.36137e-17							NXNL1				HR	TRARG1									PFKP	10.9997	29.5271	1.42458	9.48e-27	2.04e-25	KCNC2	1.75459	0.0208799	-6.39288	2.2e-14	1.19e-13
		PTPN2P1	APOB	TRIM15	LA16c-349E10.1		APOA2	6.44506	0.320521	7.6704e-18	2.4371e-17							FAM72A				MCEMP1	AQP7									HR	1.68364	6.45792	1.93949	1.99e-29	6.1e-28	TRARG1	2.52814	0.918764	-1.46031	3.66e-06	8.06e-06
		SNORA79	AOC2	DRGX	NLRP6		STXBP5L	2.76668	-0.681838	8.14287e-18	2.58315e-17							DLGAP2				AC134879.2	CPB1									MCEMP1	0.186112	0.546221	1.55331	2e-11	7.97e-11	AQP7	0.817727	0.387187	-1.07859	5.13e-06	1.11e-05
		DCAF8L2	TMOD1	AC068580.7	TMEM210		PSORS1C2	3.45437	0.140596	9.42081e-18	2.98074e-17							PRELP				CHST6	KCNK6									AC134879.2	0.547482	1.7198	1.65136	1.55e-05	3.19e-05	CPB1	335.888	1.09315	-8.26335	4.9e-21	5.41e-20
		C12orf56	SFTPB	HSPE1P5	IGFALS		CSTL1	3.10265	-3.0424	9.58304e-18	3.03048e-17							AOX1				GPR161	SLC7A2									CHST6	0.304301	0.994185	1.70802	7.23e-17	5.11e-16	KCNK6	11.0782	5.41851	-1.03175	2e-19	1.84e-18
		RP11-150O12.5	GLP2R	ADRA2B	AC092071.1		S100A9	2.85504	7.4998	1.06122e-17	3.34953e-17							TDO2				SMOX	AP000844.2									GPR161	1.32822	3.24779	1.28996	1.35e-18	1.13e-17	SLC7A2	39.3066	3.27413	-3.58559	6.48e-35	4.64e-33
		CDH18	LRRC38	RP11-190J1.3	UBXN10-AS1		MS4A8	3.23136	1.02113	1.3156e-17	4.13947e-17							KREMEN2				UBASH3B	CYP4B1									SMOX	3.35726	7.7939	1.21506	1.05e-27	2.62e-26	AP000844.2	5.37812	0.812148	-2.72729	8.76e-29	2.5e-27
		SYT14	MEDAG	PHEX-AS1	WISP2		COL9A3	2.40533	4.01472	1.32769e-17	4.17678e-17							GINS2				DSG3	NDST4									UBASH3B	0.648461	2.45428	1.92021	4.17e-28	1.09e-26	CYP4B1	9.44902	2.44307	-1.95147	5.2e-32	2.43e-30
		C18orf15	NR3C2	HS3ST4	MYH1		SLC5A5	2.46386	-0.231341	1.45416e-17	4.56356e-17							PIK3C2G				TM4SF1	PNLIPRP2									DSG3	2.81817	16.9621	2.58948	9.39e-05	0.000174252	NDST4	0.455328	0.0153891	-4.88692	0.0185093	0.0247871
		OR7E161P	IGF1	RP11-546B8.6	CADPS		GNGT1	4.64731	-1.15067	1.66692e-17	5.21147e-17							S100B				AC036108.3	IL19									TM4SF1	66.1553	169.364	1.3562	1.58e-23	2.32e-22	PNLIPRP2	0.317879	0.136548	-1.21907	4.96e-10	1.7e-09
		RP11-276H19.4	ZFP36	RP11-57A19.2	RIIAD1		SEZ6	3.6743	1.47077	1.70394e-17	5.32169e-17							LAMP5				AC103702.2	AC100793.4									AC036108.3	0.279227	0.873685	1.64567	1.78e-11	7.12e-11	IL19	0.467391	0.13373	-1.80531	9.8e-06	2.06e-05
		LINC00383	P2RY12	EMILIN3	HRASLS2		IGF2BP3	2.6537	0.219125	1.73735e-17	5.42231e-17							PLCZ1				LINC01871	FOXN1									AC103702.2	0.10136	1.15337	3.5083	5.45e-10	1.86e-09	AC100793.4	1.70028	0.312977	-2.44165	1.21e-19	1.15e-18
		RP11-678D18.1	RP11-2E11.5	GTSF1	EIF4E1B		MMP12	2.51904	2.84215	1.7715e-17	5.52605e-17							HIST1H2AM				NUF2	AOX1									LINC01871	1.17501	3.79079	1.68983	1.1e-13	5.57e-13	FOXN1	0.339997	0.152686	-1.15495	1.32e-20	1.4e-19
		AC078882.1	MIR1-1HG	DAND5	ABCG2		VTN	2.48459	1.45913	1.8207e-17	5.67368e-17							SDS				MICALL1	PDE5A									NUF2	4.75537	10.0577	1.08067	9.13e-21	9.82e-20	AOX1	2.75066	1.07016	-1.36195	4.94e-08	1.35e-07
		IFITM5	C8orf88	IFNG	RGAG1		AMER3	5.12056	-0.682018	1.91074e-17	5.94711e-17							TMEM270				RUFY4	TIMP4									MICALL1	5.55565	14.8629	1.41969	8.75e-41	1.98e-38	PDE5A	3.55894	1.69424	-1.07081	7.03e-09	2.11e-08
		VCX	RP11-96C23.13	AC010729.1	FGA		CSAG2	4.64844	-2.55004	2.33471e-17	7.2431e-17							STON1-GTF2A1L				IGHV3-11	DEGS2									RUFY4	0.236434	0.532154	1.1704	5.76e-07	1.39e-06	TIMP4	2.93581	1.03141	-1.50914	7.2e-08	1.93e-07
		LINC00305	ITM2A	RAET1K	SNORA54		MALRD1	3.04538	2.75018	2.41583e-17	7.48965e-17							TYMS				BATF2	SLC47A1									IGHV3-11	40.5819	119.638	1.55976	3.1e-05	6.12e-05	DEGS2	21.4508	3.06011	-2.80937	2.27e-42	7.32e-40
		ATP5G1P1	AC135178.7	LCN2	LINC01977		GATA5	3.7095	0.307773	2.62439e-17	8.1279e-17							NRG2				COL4A4	HIST4H4									BATF2	2.27241	4.97404	1.1302	6.73e-07	1.61e-06	SLC47A1	0.722166	0.344634	-1.06726	1.55e-06	3.57e-06
		B4GALNT2	RSPO3	PMP2	LRRC53		ASCL4	2.85057	-1.88455	2.62971e-17	8.14299e-17							RTKN2				NCAN	RAMP2-AS1									COL4A4	0.304864	0.688013	1.17427	3.85e-14	2.03e-13	HIST4H4	1.65769	0.596421	-1.47477	3.99e-13	1.9e-12
		RP11-474D1.3	ADAMTS1	KCNJ4	PRR15L		MKRN3	2.86691	0.61968	2.92549e-17	9.04194e-17							HMCN2				IGLJ2	SYBU									NCAN	0.403317	1.75125	2.1184	3.17e-16	2.1e-15	RAMP2-AS1	1.50054	0.439254	-1.77235	3.5e-19	3.14e-18
		RP11-644A7.2	FGF2	UBE2SP2	KRT41P		FAM25A	4.29854	-0.924244	3.09976e-17	9.5724e-17							NTF4				HJURP	TCEAL1									IGLJ2	0.60425	1.30524	1.1111	1.47e-08	4.24e-08	SYBU	6.74676	1.60615	-2.07059	2.56e-33	1.43e-31
		GAGE2A	FGF13-AS1	TUBB3	FAM83E		SHH	2.85261	-1.16819	3.13008e-17	9.66275e-17							SSTR1				LRRC14B	SLC40A1									HJURP	3.55052	8.17447	1.20309	1.93e-27	4.64e-26	TCEAL1	26.794	7.13678	-1.90857	1.29e-42	4.43e-40
		DLX6	RP11-138H8.6	RP11-6O2.4	CST9LP2		CPLX2	6.40481	3.1809	3.38017e-17	1.04206e-16							TUBB3				CA3	AC144450.1									LRRC14B	0.465501	2.46667	2.40571	0.0201518	0.0268277	SLC40A1	99.9593	16.9069	-2.56373	2e-30	7.1e-29
		PAGE1	SMPX	RP11-479O16.1	CYP4Z1		LHX9	3.66551	-1.33695	3.67807e-17	1.13275e-16							SYNGR3				ACE2	RSPH4A									CA3	0.80954	4.89176	2.59518	3.71e-06	8.16e-06	AC144450.1	1.32244	0.35041	-1.91609	2.43e-27	5.75e-26
		LINC01087	RHOXF1	SAMMSON	AC009336.19		SLC1A6	4.09706	0.646766	3.7189e-17	1.14435e-16							DIAPH3				FAM30A	LINC01644									ACE2	0.499377	5.7888	3.53506	3.31e-31	1.32e-29	RSPH4A	0.554082	0.227776	-1.28249	6.49e-07	1.56e-06
		PNMA5	RN7SL431P	LINC01587	MYOZ3		PRB3	2.00291	-1.80184	3.86196e-17	1.18716e-16							CNTNAP3				IGKV1OR2-6	BMPER									FAM30A	0.197598	0.509756	1.36724	3.38e-06	7.47e-06	LINC01644	1.22498	0.0931363	-3.71727	6.23e-22	7.57e-21
		RNU1-28P	SCN9A	RASGRF1	DIO1		TGM4	3.89103	0.52945	4.46467e-17	1.36803e-16							CHRNA6				COLCA2	ELOVL2-AS1									IGKV1OR2-6	1.12354	2.52338	1.16731	0.000393298	0.000671986	BMPER	0.278073	0.124637	-1.15773	1.92e-07	4.91e-07
		SSX1	LINC00924	SCGB3A2	KRT18P23		TGM3	2.32091	0.432248	4.6201e-17	1.41423e-16							THRSP				PFDN2	LCN12									COLCA2	0.420885	1.62698	1.9507	2.71e-10	9.55e-10	ELOVL2-AS1	0.55232	0.0412275	-3.74383	2.64e-21	3.01e-20
		TACR3	RP11-766F14.2	TEX15	RP11-114M1.1		SOX2	3.3577	1.20005	5.15525e-17	1.57459e-16							FAM72D				AP000851.2	KRT8P11									PFDN2	65.8812	134.6	1.03074	3.19e-20	3.23e-19	LCN12	1.16888	0.357397	-1.70952	1.38e-09	4.48e-09
		LINC02112	KLHL13	ADAMDEC1	C5orf64		COL6A5	2.52385	-1.66615	5.32517e-17	1.62539e-16							TFR2				AL355385.1	ENPP7P11									AP000851.2	0.589596	4.09262	2.79523	2.88e-14	1.54e-13	KRT8P11	1.06434	0.494658	-1.10546	1.31e-06	3.04e-06
		ALPP	XIRP2	AQP12B	RAB31		CPB1	4.79503	10.7097	5.3326e-17	1.62739e-16							CNKSR2				FGFBP2	AC009119.1									AL355385.1	0.265972	0.615524	1.21054	4.93e-09	1.51e-08	ENPP7P11	0.802599	0.128398	-2.64406	6.72e-16	4.31e-15
		RAP2CP1	LRRC3B	LINC00552	RP11-326N17.2		FOXG1	4.27566	-1.74233	5.57259e-17	1.69835e-16							MYPN				PCDHB9	REPS2									FGFBP2	0.716565	4.7876	2.74013	8.49e-13	3.9e-12	AC009119.1	2.18655	0.81081	-1.43122	1.22e-24	2.03e-23
		HIST1H1A	RPL3L	MYBPC2	GABRA2		TCF24	3.111	-1.80324	5.59759e-17	1.70568e-16							CLCN1				SIX3	KLHDC7A									PCDHB9	0.628422	1.84828	1.55638	4.41e-23	6.11e-22	REPS2	8.6236	1.61093	-2.42039	1.21e-31	5.33e-30
		RP11-356I2.1	LINC02104	LINC02159	NEURL1		GABRA1	7.03513	0.234129	7.58306e-17	2.29795e-16							CEMIP				IGKV2-29	HTRA1									SIX3	0.494365	5.9364	3.58594	1.33e-16	9.12e-16	KLHDC7A	6.51327	0.599622	-3.44126	4.9e-26	9.74e-25
		LHFPL4	bP-2189O9.2	LINC01842	LRGUK		NTNG1	2.90725	2.26184	8.69327e-17	2.63e-16							AK5				ATE1-AS1	EHMT2-AS1									IGKV2-29	5.30406	12.4875	1.23532	0.00195538	0.00303371	HTRA1	131.397	65.1249	-1.01265	1.09e-17	8.33e-17
		AF241725.6	MFAP4	SV2B	CTD-2521M24.11		SPTSSB	2.08706	4.80638	8.74162e-17	2.64419e-16							ORC1				IL12A	AL136115.2									ATE1-AS1	0.571526	1.16616	1.02887	0.0300128	0.0389254	EHMT2-AS1	0.30277	0.111505	-1.44112	1.57e-11	6.31e-11
		RP11-55J15.2	HSPB2-C11orf52	NRG2	SEPT12		MAGEC2	6.66697	0.302946	8.9256e-17	2.69894e-16							SEMA3D				FTOP1	AP005131.3									IL12A	0.312367	0.719032	1.20282	5.13e-11	1.95e-10	AL136115.2	0.356738	0.157445	-1.18002	3.12e-14	1.66e-13
		AC025016.1	AF001548.3	RP11-621L6.3	SLC34A3		SERPINA12	2.28581	-0.14755	9.49128e-17	2.86569e-16							SAPCD2				KRT16	PRRT2									FTOP1	0.354638	0.796861	1.16798	0.000464049	0.000785365	AP005131.3	0.583192	0.145798	-2	3.03e-22	3.82e-21
		CARTPT	SCN3A	LINC01910	LIPE		MT3	2.74213	-1.79769	9.75972e-17	2.94625e-16							ENAM				SCGB3A2	AMIGO2									KRT16	7.37085	94.7634	3.68443	1.28e-36	1.2e-34	PRRT2	2.11902	0.855081	-1.30926	3.77e-14	2e-13
		SPAG6	CTD-2263F21.1	CT83	RP11-968O1.5		FMR1NB	4.73814	-1.68492	9.81683e-17	2.96251e-16							CFAP45				IGLV6-57	LINC01768									SCGB3A2	0.284001	0.971381	1.77414	1.91e-08	5.44e-08	AMIGO2	14.8895	5.64856	-1.39834	5.53e-18	4.36e-17
		NEUROD1	RP1-293L6.1	RP3-523K23.2	IFITM5		SPIB	2.484	2.66138	9.92939e-17	2.99449e-16							ZNF695				HPDL	AC098869.2									IGLV6-57	40.5227	101.672	1.32712	5.39e-07	1.31e-06	LINC01768	0.418157	0.0594209	-2.815	1.21e-06	2.82e-06
		RP5-881L22.5	CNTNAP3P2	MGC32805	SIDT1-AS1		BPIFA2	5.21488	-1.82615	1.02697e-16	3.0966e-16							ADRB3				S1PR4	MYT1									HPDL	1.0881	5.57684	2.35764	8.28e-30	2.7e-28	AC098869.2	0.338716	0.124356	-1.4456	8.02e-18	6.23e-17
		RNU1-3	FNDC5	IGLV3-1	LINC00483		AKAP14	3.1076	-2.18607	1.06176e-16	3.19778e-16							ADGRD2				ADAMDEC1	PRTG									S1PR4	1.28409	2.57303	1.00272	2.29e-06	5.17e-06	MYT1	0.724937	0.0757704	-3.25815	1.84e-13	9.08e-13
		DLX2	HCAR3	ACOD1	FAM177B		NELL1	4.54615	1.50103	1.09383e-16	3.29163e-16							AJM1				FAM20A	CFB									ADAMDEC1	3.54015	8.08744	1.19187	2.27e-12	9.96e-12	PRTG	0.353529	0.116897	-1.59659	2.69e-21	3.07e-20
		VWC2L	SAA1	SNCAIP	LINC01814		C20orf85	5.49832	0.324027	1.11194e-16	3.34448e-16							TMEM132A				ZCCHC18	SLC7A13									FAM20A	1.70843	3.82247	1.16184	9.64e-11	3.56e-10	CFB	14.786	5.7224	-1.36954	3.87e-13	1.84e-12
		RMRP	CTD-2521M24.11	OFCC1	GTF2H2B		SMIM32	3.46791	-2.47132	1.12143e-16	3.3708e-16							ADGRG4				FANCA	CACNG1									ZCCHC18	0.172038	0.460738	1.42122	9.91e-13	4.51e-12	SLC7A13	0.349718	0.0436497	-3.00215	2.46e-39	3.96e-37
		C7orf33	PGM5-AS1	UTS2	SPANXB1		R3HDML	3.03484	-3.37768	1.1479e-16	3.44805e-16							EGR3				CACNA1C-AS2	MYO5C									FANCA	1.05139	2.58882	1.3	1.26e-25	2.38e-24	CACNG1	1.63818	0.16298	-3.32933	7.83e-30	2.57e-28
		LCE1B	MEOX1	DPP6	HSPB1P1		HUS1B	2.44694	-0.849904	1.18096e-16	3.54443e-16							BRIP1				GCNT2	KSR2									CACNA1C-AS2	0.248473	1.21029	2.28419	9.02e-07	2.13e-06	MYO5C	8.38982	3.62262	-1.21161	4.66e-31	1.82e-29
		GAGE1	CNTNAP3B	EPGN	GRB7		MAP3K19	2.15286	-0.924428	1.30021e-16	3.89655e-16							ADM2				IMPA2	COL10A1									GCNT2	2.02868	6.72041	1.728	7.32e-33	3.85e-31	KSR2	0.22324	0.109188	-1.03179	1.06e-09	3.48e-09
		RAX	KLHL30	TNFRSF9	KRT18P55		UPK1A	2.6892	0.97325	1.31818e-16	3.9491e-16							BMP3				ETV5	AC100801.1									IMPA2	5.8788	18.236	1.63319	1.7e-30	6.06e-29	COL10A1	47.0013	18.7649	-1.32466	8.97e-14	4.58e-13
		WNT7A	LINC00989	RARRES2P1	RP4-697K14.15		KLHL1	8.17746	1.37332	1.36747e-16	4.09475e-16							OLR1				NMT2	MYRFL									ETV5	3.20277	6.74381	1.07424	6.87e-08	1.85e-07	AC100801.1	4.64964	1.28618	-1.85403	5.74e-15	3.31e-14
		RP11-746P2.3	VIT	CLLU1OS	HIST4H4		CXCL17	2.67598	4.79717	1.46616e-16	4.38591e-16							HIST1H2AI				AC046185.3	AFP									NMT2	2.57169	5.57205	1.11549	1.58e-25	2.93e-24	MYRFL	0.502165	0.215282	-1.22193	3.78e-07	9.35e-07
		GABRG2	RP11-554A11.4	TSSC1-IT1	FOXD2		ACP7	2.7512	-1.15984	1.51984e-16	4.54351e-16							LRRN3				CD7	RIBC1									AC046185.3	1.00872	2.2796	1.17626	7.3e-16	4.65e-15	AFP	0.953997	0.19011	-2.32715	2.99e-14	1.6e-13
		SNORA38	UTS2B	PADI1	RP5-1125N11.1		LYPD8	2.73133	-0.0162331	1.52068e-16	4.54525e-16							HBG2				CLDN2	GPR139									CD7	1.70899	4.43842	1.3769	1.34e-14	7.44e-14	RIBC1	1.58349	0.736102	-1.10513	1.03e-22	1.37e-21
		RNU1-19P	CASP12	AC002480.4	AC005041.11		BPIFB6	4.54164	-2.5125	1.5336e-16	4.58312e-16							CNTFR				BOP1	SLC27A2									CLDN2	0.172487	0.511479	1.56819	2.03e-05	4.1e-05	GPR139	0.267164	0.008778	-4.92769	5.29e-17	3.77e-16
		DCD	AKR1C3	FMO2	KRT35		IDO1	2.08482	4.2819	1.55616e-16	4.6475e-16							SLC8A3				FAM90A1	FAM81B									BOP1	16.4173	34.682	1.07897	7.23e-17	5.11e-16	SLC27A2	9.95991	1.24785	-2.99668	1.39e-23	2.06e-22
		NDP	RP11-236F9.2	RP13-16H11.9	CPN2		GLDC	2.4386	2.97439	1.68536e-16	5.02672e-16							MATN3				AC027031.2	SALL2									FAM90A1	0.509105	1.26027	1.3077	7.37e-10	2.47e-09	FAM81B	0.393816	0.0521298	-2.91734	5.93e-21	6.5e-20
		LINC01518	FAM110D	SCUBE3	SCIN		PAGE2B	4.34575	-1.59319	1.68934e-16	5.03778e-16							HCN2				KLK1	AC006942.1									AC027031.2	0.529799	2.51939	2.24955	5.21e-25	9.05e-24	SALL2	5.88416	2.08968	-1.49356	1.44e-29	4.52e-28
		LINC01926	HORMAD2-AS1	SMR3B	RP11-749I16.3		PCDH10	3.40024	3.37078	1.81193e-16	5.39803e-16							GALR1				LINC01436	CYP2T1P									KLK1	0.469453	1.75405	1.90164	9.2e-05	0.000171082	AC006942.1	0.916952	0.448942	-1.03032	1.17e-10	4.29e-10
		SCARNA1	CX3CL1	LINC01740	CASP12		TUBB4A	2.39235	0.974433	1.90084e-16	5.65735e-16							SAA2				ZAP70	IL20									LINC01436	1.27429	11.3951	3.16064	3.64e-13	1.74e-12	CYP2T1P	58.4959	1.71396	-5.09293	5.59e-32	2.59e-30
		PRSS33	HPSE2	LINC01508	RNU6-617P		SLITRK6	2.53993	6.38243	1.92649e-16	5.73086e-16							C6orf58				LINC01956	C1orf220									ZAP70	1.09109	2.28417	1.0659	6.64e-07	1.59e-06	IL20	4.40949	0.174758	-4.65718	1.17e-30	4.24e-29
		RNU1-32P	ASB12	BRINP1	GPR139		FADS6	3.22343	-1.57361	1.94693e-16	5.78882e-16							ARTN				FSCN1	AL157702.2									LINC01956	0.47251	9.09962	4.26739	1.12e-31	4.92e-30	C1orf220	0.499157	0.233537	-1.09584	1.13e-18	9.55e-18
		RN7SL508P	URAD	CDH12	CCND2P1		IVL	4.06233	0.393242	2.30702e-16	6.8382e-16							CST2				LGR6	AGXT									FSCN1	16.6506	59.3115	1.83274	1.37e-31	5.94e-30	AL157702.2	0.311899	0.0871558	-1.83941	2.36e-20	2.43e-19
		RP5-1170K4.7	SCN2B	B4GALNT1	TEX19		MAGEA3	7.82853	2.08344	2.31859e-16	6.86914e-16							MYO18B				SLC16A1-AS1	ST8SIA6									LGR6	1.60725	7.46	2.21459	2.56e-09	8.06e-09	AGXT	0.236213	0.0131572	-4.16616	0.0164411	0.0221972
		RP11-556O9.3	RP1-18D14.7	GBX2	RP1-302G2.5		NCAN	4.7262	2.63893	2.80624e-16	8.29356e-16							OTC				IGKV2-30	LRP1B									SLC16A1-AS1	0.158489	0.485691	1.61565	1.65e-22	2.14e-21	ST8SIA6	6.2345	1.39994	-2.15491	6.28e-23	8.57e-22
		RN7SL329P	LINC01586	HLA-DPA3	SYP		CRISP3	4.02548	6.12816	3.58271e-16	1.05522e-15							HIST1H2BO				RF02247	AF127577.4									IGKV2-30	4.35137	12.7799	1.55434	0.000908026	0.00147399	LRP1B	0.898521	0.0889276	-3.33685	1.76e-05	3.6e-05
		S100A2	RP11-236L14.2	UBE2Q2L	SLC1A2		CSMD3	4.74097	1.24473	3.71069e-16	1.09168e-15							CCL16				PABPC4L	AC023024.2									RF02247	0.14125	0.813596	2.52606	2.44e-17	1.8e-16	AF127577.4	1.02808	0.486938	-1.07814	1.31e-19	1.24e-18
		RNU1-89P	LINC00445	MRGPRX3	RP11-96J19.4		FTHL17	7.66349	-1.11602	3.85598e-16	1.13332e-15							IL4I1				AL391422.4	ANKRD30BP1									PABPC4L	0.386408	0.866479	1.16504	5.65e-14	2.95e-13	AC023024.2	1.41133	0.665173	-1.08525	6.32e-12	2.65e-11
		CHCHD4P5	RP4-663N10.1	TMEM132E	DOK7		CDSN	2.74637	-0.354791	3.87104e-16	1.13756e-15							TCEAL6				RARB	AC018816.2									AL391422.4	1.40216	2.9442	1.07022	7.21e-12	3.01e-11	ANKRD30BP1	0.741631	0.012962	-5.83833	4.15e-33	2.26e-31
		PRDM13	DUSP26	DCT	KRT18P33		HTR1E	3.65147	-2.46005	4.01618e-16	1.17983e-15							FOXP3				IGHV3-43	HHAT									RARB	1.82585	3.91821	1.10162	1.79e-14	9.82e-14	AC018816.2	0.470116	0.0749989	-2.64808	1.31e-18	1.1e-17
		CTD-2280E9.1	C10orf71-AS1	VAX2	NATP		CCDC60	3.43993	-1.17442	4.70854e-16	1.37743e-15							HASPIN				CLDN9	FLJ33534									IGHV3-43	6.33882	20.6718	1.70538	3.77e-05	7.36e-05	HHAT	4.37126	1.69969	-1.36278	2.43e-33	1.36e-31
		RP11-463D19.1	LINC01474	ADGRL3	BPIFA4P		CCKBR	4.05806	0.191975	4.89588e-16	1.43131e-15							RIPPLY3				GTSE1	AC061961.1									CLDN9	0.554171	2.42406	2.12902	2.78e-13	1.35e-12	FLJ33534	0.322621	0.0975139	-1.72616	1.02e-05	2.13e-05
		RP1-102G20.5	FGF14-AS2	GNAT1	RNU5B-1		FAM135B	2.58469	1.71403	4.93088e-16	1.44132e-15							RNASE7				LINC02576	TOM1L1									GTSE1	2.63572	5.99952	1.18665	2.75e-23	3.92e-22	AC061961.1	2.44672	0.0153652	-7.31504	1.01e-22	1.34e-21
		RP11-263K4.5	ASB10	RELN	RUNDC3A		CFAP65	2.08581	0.0276728	5.07672e-16	1.48275e-15							HIST1H2BK				FOXL1	OVGP1									LINC02576	0.184527	0.398928	1.1123	9.7e-06	2.04e-05	TOM1L1	8.62203	4.21453	-1.03266	4.17e-20	4.15e-19
		GSTA3	TRIM54	SAA4	CLEC11A		MEPE	4.00303	0.104156	5.12191e-16	1.49523e-15							IL21R				SNORD93	STARD3									FOXL1	0.343037	1.41932	2.04877	2.69e-20	2.75e-19	OVGP1	1.77737	0.777398	-1.19302	2.14e-17	1.59e-16
		GTF3AP6	AC092155.4	MCRIP2P1	MIR149		ERVV-1	3.07469	-2.07833	5.16552e-16	1.50772e-15							SLC16A3				KCNMB1	CPA3									SNORD93	0.168433	0.544583	1.69298	3.4e-14	1.81e-13	STARD3	20.7234	8.13132	-1.3497	1.14e-08	3.33e-08
		RNA5-8SP6	LINC00377	RP11-495P10.9	ITIH2		REG4	2.42619	-2.3604	5.71902e-16	1.66633e-15							TIGD3				RGS9	TMBIM4									KCNMB1	1.03686	2.41904	1.22222	1.04e-07	2.74e-07	CPA3	13.1659	2.60007	-2.34018	5.01e-29	1.47e-27
		RP11-539E17.5	DUSP27	ENPP7P2	LURAP1L		COL2A1	3.29965	6.19184	6.15865e-16	1.79068e-15							LMX1A				TUBA4A	NCBP2L									RGS9	0.697949	1.40394	1.00829	0.00344758	0.00515368	TMBIM4	17.314	8.5378	-1.02	6.88e-34	4.23e-32
		RP11-661D19.3	NWD2	KRT5	RPL7AP26		NFE4	4.34338	0.789902	6.49952e-16	1.88889e-15							MISP				KIF14	PPM1J									TUBA4A	9.22102	20.9026	1.18068	4.81e-20	4.75e-19	NCBP2L	0.450978	0.100572	-2.16482	9.97e-32	4.41e-30
		RP11-127O4.2	OVCH2	CCL5	TATDN2P3		PRMT8	2.62277	-1.4056	6.64139e-16	1.92919e-15							EFCAB1				ENO1	AC010326.4									KIF14	1.59503	3.20257	1.00565	5.42e-16	3.5e-15	PPM1J	4.29669	1.7106	-1.32872	4.75e-16	3.09e-15
		S100A7A	PPP1R3A	TSHR	RNU5A-1		PADI3	2.90466	1.48954	6.78474e-16	1.9702e-15							ISG15				XKR9	CACNG6									ENO1	198.75	428.597	1.10866	2.99e-30	1.04e-28	AC010326.4	8.0756	3.48783	-1.21124	7.4e-23	9.99e-22
		RNU1-20P	ZBTB16	BARX1-AS1	AC004156.3		EN1	2.26525	3.93104	7.82825e-16	2.26778e-15							PRR11				LINC01558	RPS20P22									XKR9	0.351068	0.823396	1.22984	6.05e-12	2.54e-11	CACNG6	0.947152	0.120691	-2.97228	0.000872902	0.00142025
		LA16c-381G6.1	TECRL	HIST1H2BJ	MUC1		TMEM179	3.36922	0.597839	9.17273e-16	2.64696e-15							SCN2A				IRX1	ACMSD									LINC01558	0.195921	0.551434	1.49292	2.76e-07	6.94e-07	RPS20P22	0.759979	0.218813	-1.79626	3.72e-06	8.19e-06
		LINC00709	RNU6ATAC35P	SEMG1	RAMP1		NLRP7	2.38692	-0.702236	9.19397e-16	2.65199e-15							PTN				LAMP3	AC025917.1									IRX1	3.02254	16.7833	2.47319	2.69e-09	8.45e-09	ACMSD	0.484514	0.10537	-2.20108	8.57e-15	4.84e-14
		LINC02159	TACR1	RP11-470M17.2	PLA2G4C-AS1		TPSG1	2.48015	1.91195	1.06195e-15	3.053e-15							HIST1H3J				SKA3	TMEM145									LAMP3	2.40949	9.8737	2.03487	6.59e-27	1.45e-25	AC025917.1	1.34181	0.32201	-2.05901	1.52e-29	4.77e-28
		C1orf137	CHL1-AS2	RAPSN	RP11-616M22.1		C1orf167	2.52898	-0.900012	1.16401e-15	3.34323e-15							GFAP				AC007785.1	SGCG									SKA3	3.0415	6.69682	1.13869	4.13e-23	5.74e-22	TMEM145	1.85971	0.31766	-2.54952	2.51e-21	2.87e-20
		C11orf86	KCNE1	RDH12	FAM153C		LOR	5.38101	0.526417	1.20853e-15	3.46672e-15							GADL1				FZD9	KRT37									AC007785.1	0.169103	0.369431	1.1274	0.00561442	0.00813624	SGCG	1.16086	0.124714	-3.2185	1.21e-09	3.94e-09
		LINC02129	CTD-2023N9.1	AC012354.6	SCN2B		ADAMTS19	2.30262	1.23302	1.21424e-15	3.48201e-15							CDC25A				IGKV2-26	GPM6A									FZD9	0.265913	2.87819	3.43613	1.58e-43	7.4e-41	KRT37	0.299469	0.0185841	-4.01027	1.12e-36	1.07e-34
		SNORD15A	RP11-696F12.1	PRRG3	SYCE3		CCDC196	2.99105	-0.371815	1.32097e-15	3.77851e-15							HTR1D				SCUBE3	SLC16A6									IGKV2-26	0.299248	1.01018	1.7552	0.00922299	0.0129469	GPM6A	0.597071	0.0935533	-2.67404	5.15e-05	9.9e-05
		HOMER2P1	DSC1	CTD-2377D24.4	LINC01924		COL9A1	3.70179	1.67364	1.42035e-15	4.05894e-15							HIST1H4I				PTPRZ1	PRDX1P1									SCUBE3	2.5715	5.38	1.065	0.00297874	0.00449554	SLC16A6	13.726	0.915699	-3.90589	3.65e-47	4.22e-44
		RP11-654G14.1	PSAT1P3	NKAIN2	LACRT		UCN3	9.02577	2.14146	1.60437e-15	4.57688e-15							CXCL11				ALDH1A3	RAB11FIP1									PTPRZ1	0.361812	1.29977	1.84495	3.58e-07	8.87e-07	PRDX1P1	1.21028	0.360148	-1.74868	4.32e-12	1.84e-11
		NKX2-5	SOD3	ATP2B3	RP11-700H6.1		SLC5A8	3.9808	3.45428	1.6112e-15	4.59567e-15							BCAS4				AP000523.1	AL591848.4									ALDH1A3	2.61326	6.94012	1.40911	3.88e-15	2.28e-14	RAB11FIP1	18.4949	7.26984	-1.34713	2.41e-13	1.17e-12
		RANBP20P	MYOM2	MUC7	UMOD		TFF1	2.89349	7.68209	1.66067e-15	4.73377e-15							E2F8				SPINK5	LRFN2									AP000523.1	0.249225	0.503487	1.0145	1.13e-07	2.95e-07	AL591848.4	0.507399	0.163239	-1.63613	5.12e-25	8.9e-24
		RP11-473O4.1	SERTM1	LAG3	TEKT4		CYP2F1	3.43536	-1.85364	1.73936e-15	4.95341e-15							KIFC2				VANGL2	AL157387.1									SPINK5	0.302471	0.688817	1.18732	0.00606507	0.00875769	LRFN2	0.363148	0.155719	-1.22162	5.31e-24	8.22e-23
		RP11-846F4.6	RP11-594N15.3	RGS7BP	RNY1P14		KRT20	5.64368	1.15569	1.81745e-15	5.17012e-15							NR4A3				PROM1	FNDC11									VANGL2	8.34422	17.4135	1.06136	4.62e-14	2.43e-13	AL157387.1	44.842	1.96016	-4.51581	4.55e-33	2.44e-31
		RN7SL826P	C1QTNF7	RAX	RP11-314P15.1		ACTL6B	4.2772	-1.00941	1.87075e-15	5.31759e-15							IRX6				PCOLCE2	SIGLEC6									PROM1	6.46587	32.876	2.34612	2.64e-29	8.02e-28	FNDC11	0.306966	0.150739	-1.02603	2.24e-10	7.96e-10
		RP11-84N19.1	C2orf88	CD1A	RP3-468B3.4		KCNG1	2.36441	2.54151	1.95142e-15	5.53735e-15							GLDN				MRAS	RNA5SP268									PCOLCE2	1.2035	2.78421	1.21003	7.24e-08	1.94e-07	SIGLEC6	0.324135	0.139917	-1.21203	4.16e-09	1.28e-08
		WFDC13	GDF10	LINC01667	RP1-232N11.2		SLC18A1	2.80776	-1.39553	2.08614e-15	5.90948e-15							PRR36				AP003032.1	TUBA3E									MRAS	4.17814	12.4882	1.57964	1.25e-31	5.46e-30	RNA5SP268	0.278038	0.119479	-1.21852	2.26e-05	4.53e-05
		VAX1	RP11-286H15.1	ANGPTL4	NXPH1		PSCA	2.39491	3.6597	2.20857e-15	6.25141e-15							ITPKA				AL022316.1	AC026704.1									AP003032.1	0.124061	0.726059	2.54904	1.52e-12	6.81e-12	TUBA3E	1.47447	0.124553	-3.56537	3.75e-27	8.61e-26
		RP11-709A23.2	PAK5	RP11-615J4.3	AC061961.2		APOBEC4	3.63363	-2.32594	2.334e-15	6.59308e-15							OGN				SLURP1	GATA4									AL022316.1	0.819282	1.94205	1.24515	3.78e-07	9.35e-07	AC026704.1	0.514021	0.175848	-1.5475	7.78e-13	3.58e-12
		KRT41P	RBFOX1	SELE	ATRNL1		ZFP42	4.94259	0.22753	2.44612e-15	6.9012e-15							PNMA8C				FOLH1	CERS4									SLURP1	0.909374	4.06255	2.15944	1.24e-18	1.04e-17	GATA4	0.388318	0.0509042	-2.93138	0.00127056	0.00201997
		MIR196A2	RP11-6O2.3	KIAA1644	SRGAP3-AS2		C4orf51	2.76217	-2.42605	2.58314e-15	7.27986e-15							CXCL10				DLL3	AC023024.1									FOLH1	1.03482	2.71597	1.39209	7.33e-21	7.97e-20	CERS4	25.7999	12.8664	-1.00376	1.28e-21	1.51e-20
		LINC00210	AC002451.3	RP11-1036E20.7	GPRC5A		MUC13	3.05129	0.325332	2.62347e-15	7.39122e-15							GPRC5A				SH2D2A	PALM									DLL3	0.169728	0.62948	1.89093	3.7e-16	2.43e-15	AC023024.1	0.771597	0.370226	-1.05944	9.11e-13	4.17e-12
		SHANK2-AS1	CTNNA3	IGLV9-49	LINC00589		OLFM3	6.06922	0.570483	2.6671e-15	7.51299e-15							C3orf67				KCNIP3	GHR									SH2D2A	1.45418	4.10849	1.4984	9.3e-32	4.15e-30	PALM	8.05026	3.59165	-1.16439	1.58e-21	1.84e-20
		RP11-433A19.2	SOGA3	RP11-403I13.5	AF241725.6		GTSF1	2.05382	0.471948	2.76725e-15	7.79027e-15							SLC7A14				B3GNT7	CST3									KCNIP3	0.612737	1.30395	1.08955	0.0388265	0.0495302	GHR	3.18492	1.56846	-1.02191	4.57e-15	2.66e-14
		RP11-556I13.2	AP000445.1	RP11-396O20.2	CEACAM6		CHGB	4.78259	6.79361	2.79098e-15	7.85462e-15							GNG13				TMIGD2	CASP16P									B3GNT7	1.39315	6.68638	2.26287	1.47e-24	2.43e-23	CST3	85.7	41.0268	-1.06273	2.85e-20	2.9e-19
		AC097721.1	PTH1R	SNORD93	CSMD3		CLRN1	2.74349	-3.44821	2.86592e-15	8.06054e-15							HIST1H3D				TINAGL1	GDAP1									TMIGD2	0.199346	0.482774	1.27607	2.17e-06	4.92e-06	CASP16P	0.593855	0.166793	-1.83205	3.78e-16	2.48e-15
		CXorf67	LINC00671	RP11-674E16.4	RP4-737E23.2		COX7B2	6.46018	-2.02697	3.21594e-15	9.02541e-15							GFRA2				MCRIP2P1	Z82246.1									TINAGL1	6.33265	14.375	1.18268	1.03e-19	9.78e-19	GDAP1	9.71907	2.89419	-1.74766	7.61e-10	2.55e-09
		RN7SL151P	DACT2	HTR6	MKNK2P1		LRRC24	2.34899	-4.27129	3.39591e-15	9.51724e-15							DPP6				JRKL	ATP1A2									MCRIP2P1	0.223081	1.34331	2.59015	8.38e-22	1e-20	Z82246.1	1.02991	0.140642	-2.87241	1.49e-20	1.57e-19
		SCGB1B2P	GPR17	LINC01539	NTNG1		SOHLH1	3.72254	-1.92991	3.57433e-15	1.00019e-14							HIST1H2BE				APCDD1L-DT	ERICH3									JRKL	2.89878	6.45021	1.1539	3.63e-32	1.75e-30	ATP1A2	0.683315	0.226918	-1.59038	3.85e-18	3.07e-17
		LARGE-AS1	TMTC1	RP11-7I15.4	GSTM2		FAM216B	2.85926	-2.36857	3.72184e-15	1.0405e-14							ASB4				PRSS16	SLC25A24P2									APCDD1L-DT	0.210892	1.06682	2.33875	2.46e-08	6.93e-08	ERICH3	0.4341	0.0748007	-2.5369	6.95e-15	3.97e-14
		RP11-269F21.3	SMIM10L2A	C1QTNF1-AS1	RP11-88E18.1		TLX3	5.6342	-1.85895	3.85706e-15	1.07747e-14							ELANE				AP006545.1	IFITM5									PRSS16	1.7718	3.56858	1.01014	4.78e-12	2.03e-11	SLC25A24P2	1.92976	0.149354	-3.69161	4.51e-08	1.23e-07
		FAR2P3	RP1-278D1.2	RP11-546K22.1	ANGPTL8		ELAVL3	3.29328	-0.731642	3.93856e-15	1.09973e-14							S100P				ALKAL2	VIPR2									AP006545.1	0.178682	0.36329	1.02372	3.78e-09	1.17e-08	IFITM5	0.268012	0.0387973	-2.78827	0.000108494	0.00019968
		ZIC5	MRGPRX2	RYR1	RP1-288H2.2		MUC5AC	4.70824	3.23945	4.07653e-15	1.13721e-14							ACKR1				WNK3	P2RY4									ALKAL2	0.263515	1.0976	2.05839	6.7e-14	3.47e-13	VIPR2	0.728365	0.239829	-1.60266	1.99e-05	4.03e-05
		RNU6ATAC	AGBL1	IGHV1-69	LINC01674		CHGA	5.08368	6.30938	4.70169e-15	1.30999e-14							C9orf116				PDXK	SERPINA11									WNK3	0.252338	0.536643	1.0886	3.86e-12	1.65e-11	P2RY4	0.229844	0.0524699	-2.1311	2.69e-05	5.35e-05
		RN7SL28P	ABI3BP	RP11-332J15.4	RXRG		NGB	2.97602	-2.22108	4.74771e-15	1.32241e-14							COX6C				DOK5	ACOT4									PDXK	10.3527	22.4371	1.11588	2.43e-25	4.39e-24	SERPINA11	12.2048	0.739266	-4.04521	1.01e-35	8.12e-34
		IRS4	AC093609.1	RP11-319F12.2	SPACA4		GCGR	2.631	-2.33214	4.84958e-15	1.35016e-14							TNFRSF18				APCDD1L	CACNA2D2									DOK5	1.00905	2.66002	1.39844	1.02e-08	2.99e-08	ACOT4	6.75782	2.60203	-1.37692	1.56e-31	6.71e-30
		C6orf118	IQSEC3	IGHG2	SKAP1		NXPH1	4.07226	2.92901	5.07816e-15	1.4125e-14							CD80				TOX	AL136115.1									APCDD1L	0.832249	3.95702	2.24933	7.85e-10	2.62e-09	CACNA2D2	3.90966	0.548218	-2.83422	1.07e-41	3.05e-39
		LL22NC03-63E9.3	C10orf142	SLITRK2	RP11-1299A16.3		HYPM	2.69793	-4.27	5.09364e-15	1.41659e-14							SYNDIG1				GBP5	ABCA8									TOX	0.822468	1.84567	1.16612	3.56e-13	1.71e-12	AL136115.1	0.383357	0.165356	-1.21311	2.37e-19	2.17e-18
		NF1P8	SCN5A	ANXA3	AZU1		STRA8	4.19515	-1.34614	5.12182e-15	1.42377e-14							FAM72B				CSTB	AC011365.1									GBP5	2.61438	9.26106	1.82471	5.36e-12	2.26e-11	ABCA8	0.792681	0.395406	-1.00341	6.01e-07	1.45e-06
		CTA-392E5.1	RP11-386I14.2	ATCAY	RP11-466M21.1		SLC38A8	2.71929	-2.91025	5.25514e-15	1.46039e-14							CST4				WIPF3	MIR27B									CSTB	55.844	151.374	1.43864	8.79e-31	3.26e-29	AC011365.1	0.322672	0.0472382	-2.77204	2.58e-35	1.95e-33
		KNCN	RPL21P135	MCEMP1	DNAH6		CYP2W1	2.57382	-2.14232	5.42497e-15	1.50643e-14							NSG1				MIR4537	AMPH									WIPF3	0.853414	2.1989	1.36546	2.55e-13	1.24e-12	MIR27B	0.64624	0.306715	-1.07517	4.31e-05	8.37e-05
		AC114763.1	CADM3-AS1	AC073043.1	C15orf59-AS1		POU4F3	2.40662	-2.00392	5.5596e-15	1.5424e-14							TESMIN				IGHV1-69D	SIAH2-AS1									MIR4537	0.411857	1.21634	1.56234	2.7e-05	5.37e-05	AMPH	2.17509	0.597258	-1.86465	3.06e-18	2.47e-17
		NCKAP5-IT1	CLCA4	AC004158.3	C1orf194		CTNNA2	3.23116	0.205066	5.67673e-15	1.57417e-14							PIF1				HOXA10-AS	C6									IGHV1-69D	37.0872	86.246	1.21754	4.42e-06	9.66e-06	SIAH2-AS1	1.5131	0.332767	-2.18492	2.94e-25	5.25e-24
		RP11-709P2.1	AC011286.1	TESC	C1orf167		CTXN2	2.07952	-3.91515	5.7496e-15	1.59389e-14							RGS7BP				PIMREG	AL645924.1									HOXA10-AS	0.176789	0.458366	1.37447	0.0180541	0.0242203	C6	0.43633	0.209827	-1.05622	6.35e-06	1.36e-05
		RP3-333B15.5	AC010969.1	RP11-711D18.2	CLDN25		HSD3B2	5.08486	0.986707	6.76985e-15	1.87016e-14							LCN6				GABBR2	INPP5J									PIMREG	2.19592	6.25787	1.51085	1.7e-25	3.14e-24	AL645924.1	0.843252	0.1203	-2.80932	1.26e-29	4.01e-28
		RN7SL564P	AC073130.3	BATF2	APOC3		OTP	2.4818	-3.32689	7.08096e-15	1.95402e-14							CAMK2N2				AL109615.3	HIST1H3H									GABBR2	0.180795	1.52734	3.0786	4.11e-30	1.39e-28	INPP5J	9.78916	1.39904	-2.80675	1.96e-43	8.76e-41
		RP11-351O2.2	CLEC4G	RP11-109M17.2	ANKRD29		SLIT1	2.43988	2.56523	7.15781e-15	1.97402e-14							GABRE				IGKV3-15	AP005131.1									AL109615.3	1.50327	11.338	2.91499	2.1e-07	5.33e-07	HIST1H3H	10.8596	5.25508	-1.04719	0.0170725	0.022996
		SPO11	RP11-17A4.2	RPL23AP11	GRIN1		SLC22A24	3.54327	-3.34297	7.16555e-15	1.97556e-14							ALX4				RPS7P3	ADAM33									IGKV3-15	46.7952	138.308	1.56345	1.16e-07	3.03e-07	AP005131.1	0.22022	0.105169	-1.06624	4.2e-08	1.16e-07
		LINC02003	MMP27	COL4A3	ATP5F1P5		POTEJ	2.60536	-1.69191	7.19595e-15	1.98364e-14							HIST1H2BH				AC073195.1	FAR2P3									RPS7P3	0.182028	0.402401	1.14447	2.11e-12	9.29e-12	ADAM33	0.929304	0.441312	-1.07435	6.58e-11	2.48e-10
		F13B	AKR1C2	RP4-555D20.4	RP11-527N22.1		GPR139	3.94046	-1.23453	8.26042e-15	2.27258e-14							DQX1				CEACAM19	AC093297.1									AC073195.1	0.488511	1.00388	1.03913	2.08e-19	1.92e-18	FAR2P3	0.411025	0.0134038	-4.93851	2.52e-11	9.91e-11
		KRT31	PHYHIP	ANKRD35	RP11-35O15.1		GRIA2	3.31147	4.54552	9.39924e-15	2.57691e-14							RNF186				CYCSP6	CYP2G1P									CEACAM19	0.719258	2.12643	1.56385	4.08e-18	3.25e-17	AC093297.1	20.1272	0.0274585	-9.51768	3.94e-30	1.35e-28
		EDDM3B	TCEAL5	C19orf84	MTATP8P1		SLURP1	2.91701	-0.584395	1.26418e-14	3.44561e-14							EPN3				RAD51AP1	CAPSL									CYCSP6	0.261178	1.00022	1.93722	2.74e-10	9.64e-10	CYP2G1P	1.05665	0.0544261	-4.27905	4.79e-21	5.3e-20
		RN7SKP255	P2RX6	KRT17P6	SPAG6		GPR22	2.74119	-1.95399	1.38322e-14	3.75707e-14							PENK				IGLV7-46	MIR4664									RAD51AP1	4.26149	10.0404	1.23639	1.71e-19	1.59e-18	CAPSL	1.48984	0.221647	-2.74882	1.14e-20	1.22e-19
		RNU1-27P	COL17A1	RP11-363I22.3	SPPL2C		PLA2G2F	2.71253	-2.83871	1.40949e-14	3.82731e-14							MAPK8IP2				IL1RL2	ZNF703									IGLV7-46	11.5742	25.2199	1.12365	0.00692483	0.00991855	MIR4664	12.3101	6.12608	-1.00681	1.51e-09	4.88e-09
		RNY3	AC013275.2	NSG1	NTS		MAGEA8	2.61523	-0.512619	1.46259e-14	3.96741e-14							KIAA1211				PLCG2	PLCL1									IL1RL2	0.567582	1.5493	1.44871	2.31e-22	2.95e-21	ZNF703	76.9116	12.8197	-2.58484	9.78e-41	2.16e-38
		SLC15A1	EPHB1	CTD-2139B15.5	LGALS9B		RIMS2	2.25793	2.14332	1.58153e-14	4.28291e-14							HAPLN1				MELK	SERPINA12									PLCG2	1.43641	3.853	1.42352	2.64e-26	5.39e-25	PLCL1	1.9477	0.760097	-1.35751	1.5e-11	6.03e-11
		RP11-314N14.1	MIR23A	MAGEB1	ZMAT4		ARL14	2.93089	-2.87754	1.95953e-14	5.28136e-14							AGMO				TLDC1	CD36									MELK	5.97643	14.212	1.24976	2.46e-25	4.43e-24	SERPINA12	0.434304	0.159473	-1.4454	1.46e-08	4.2e-08
		UNC80	SCN3B	RP11-17A4.2	GDAP1		PAH	2.36031	1.14492	2.0307e-14	5.46911e-14							CREB3L1				JPH2	C17orf58									TLDC1	2.81745	6.1979	1.13739	1.23e-26	2.61e-25	CD36	9.96362	4.21367	-1.24159	1.03e-05	2.16e-05
		SLC17A8	CSF3	CPA4	CYB5AP5		POTEI	2.08971	-0.0684589	2.04496e-14	5.50591e-14							DBX2				IRAK1	ADIPOQ									JPH2	0.714149	1.90074	1.41226	2.07e-06	4.69e-06	C17orf58	22.8986	8.71667	-1.39341	1.64e-31	6.98e-30
		LINC00992	RERGL	NXPH4	FOXD4L4		TRIML2	2.63904	-2.27974	2.13703e-14	5.74357e-14							TNFRSF9				AQP5	CX3CR1									IRAK1	30.4195	61.2332	1.00932	4.5e-27	1.02e-25	ADIPOQ	6.64869	2.57283	-1.36971	9.89e-07	2.33e-06
		CFC1	HOXA6	SH2D5	DSCAM-AS1		TCHHL1	5.31935	-2.34295	2.49716e-14	6.69288e-14							FFAR3				AC025062.1	MYB									AQP5	4.36417	35.9041	3.04037	2.48e-21	2.85e-20	CX3CR1	3.6607	1.63215	-1.16534	8.09e-11	3.02e-10
		CPA6	MYH6	FAM96AP2	LINC00578		ISL2	2.46943	-1.95135	2.68982e-14	7.19305e-14							NRG1				IGHV1-14	CHRM4									AC025062.1	0.206716	0.502206	1.28063	8.01e-10	2.68e-09	MYB	19.7956	6.67921	-1.56743	9.51e-35	6.61e-33
		RNVU1-18	RP11-153F1.1	ADGRG3	RNU6ATAC14P		STAR	2.63047	1.55996	2.704e-14	7.2299e-14							HIST2H4A				HLA-DPA3	EDA2R									IGHV1-14	0.407378	1.11282	1.44978	0.000540964	0.000906569	CHRM4	0.291171	0.096235	-1.59723	4.91e-13	2.32e-12
		AHSG	AC005682.5	MYO16-AS1	CYP2A7P1		MLC1	2.43945	1.62814	2.74686e-14	7.34127e-14							CYSRT1				DUSP9	AP003419.3									HLA-DPA3	0.410332	1.14617	1.48196	5.03e-11	1.92e-10	EDA2R	1.30086	0.637244	-1.02954	3.86e-17	2.8e-16
		RP11-6N13.1	PLCZ1	ZP4	NNAT		CYP19A1	2.75271	2.1466	2.74769e-14	7.34241e-14							SFRP1				NMB	CFAP61									DUSP9	0.428162	2.28988	2.41904	5.75e-30	1.93e-28	AP003419.3	1.29504	0.418187	-1.63078	1.1e-19	1.05e-18
		SHANK2-AS2	PRELP	SPATA3-AS1	MIR3165		ASZ1	4.30885	-3.16668	2.78155e-14	7.4285e-14							ILDR2				SOS1-IT1	C20orf85									NMB	3.93657	10.2371	1.3788	1.55e-24	2.56e-23	CFAP61	0.327307	0.0418357	-2.96784	1.25e-45	8.6e-43
		LINC01633	TP53AIP1	MROH3P	CALCR		BARX1	2.471	0.917411	3.0225e-14	8.06253e-14							METRN				CBX2	ANKRD42									SOS1-IT1	1.00201	2.01712	1.0094	4.09e-23	5.69e-22	C20orf85	1.63907	0.110011	-3.89716	4.4e-09	1.35e-08
		PLG	RP11-475B2.1	POU3F4	FSTL4		DSPP	3.05047	-3.56688	3.12354e-14	8.32594e-14							COL1A1				SLC35F2	SLC39A6									CBX2	3.87041	10.5956	1.45291	3.95e-26	7.94e-25	ANKRD42	3.11784	1.45222	-1.10229	4.03e-32	1.93e-30
		CLVS2	ADGRG4	MKRN3	ABHD2		GP2	2.68439	5.48731	3.30135e-14	8.79344e-14							RHBDL1				AC114956.2	SYNC									SLC35F2	4.71104	11.222	1.25221	4.12e-21	4.58e-20	SLC39A6	401.114	44.658	-3.16702	6.44e-43	2.64e-40
		PRR35	C1DP5	RN7SL417P	PCSK6		UNC93A	3.22797	-2.90064	3.48835e-14	9.27654e-14							C20orf204				AC019254.1	DAB1									AC114956.2	0.247428	1.8014	2.86404	0.00225587	0.00346574	SYNC	1.57916	0.715626	-1.14188	4.25e-24	6.67e-23
		RN7SL836P	CYP1A1	CLEC6A	RERG-AS1		LHX3	4.15379	-3.587	3.71186e-14	9.85504e-14							HIST1H2AD				ROPN1	HEPACAM2									AC019254.1	0.193611	0.392798	1.02063	5.95e-09	1.8e-08	DAB1	0.274077	0.0741291	-1.88647	4.94e-05	9.5e-05
		TPH2	RPS4XP5	COL11A2	CHRNA6		POU5F2	2.6673	-1.31728	3.73278e-14	9.90769e-14							TICRR				VWDE	CA4									ROPN1	0.198544	3.90652	4.29835	3.96e-40	7.87e-38	HEPACAM2	2.06992	0.369369	-2.48644	1.07e-23	1.6e-22
		RP11-287J9.1	HMCN2	AC107057.1	PRTN3		DMRT1	3.53683	-1.96344	4.26051e-14	1.12804e-13							FGFBP2				UMODL1	LINC01411									VWDE	0.356559	0.725411	1.02466	1.29e-09	4.22e-09	CA4	0.289409	0.10017	-1.53065	0.00187364	0.00291332
		GSTA2	AOX1	HCRTR2	ABCC6		NCCRP1	2.29547	4.05043	4.26363e-14	1.12853e-13							NKX3-2				IGHV1-69	AC005920.1									UMODL1	0.198698	0.667213	1.74757	4.44e-10	1.53e-09	LINC01411	0.757716	0.0556658	-3.7668	3.99e-24	6.28e-23
		ZG16	PTENP1-AS	FANCD2OS	RP11-53B2.4		TTR	3.66669	-1.3791	4.29528e-14	1.13658e-13							ART1				FOXC1	AC023137.1									IGHV1-69	12.1256	44.6641	1.88106	4.19e-06	9.2e-06	AC005920.1	0.279766	0.102166	-1.4533	8.62e-16	5.45e-15
		RP1-228P16.3	CCL28	ALX4	RNU6-848P		KNG1	3.52528	-2.34562	5.48176e-14	1.44485e-13							HSH2D				RNF150	TCIM									FOXC1	3.02665	28.3939	3.22978	2.45e-41	6.35e-39	AC023137.1	0.485294	0.119166	-2.02588	4.67e-26	9.3e-25
		CNMD	MIR133A1HG	FADS6	TGM3		TBX10	4.17271	0.374971	6.4766e-14	1.70286e-13							LEF1				FGFBP1	PLAC9P1									RNF150	0.823356	2.61761	1.66866	1.67e-06	3.83e-06	TCIM	45.0859	18.608	-1.27675	3.5e-08	9.7e-08
		APOA5	CNKSR2	RP11-25I15.3	RN7SL3		PDX1	4.66789	-2.80713	6.48036e-14	1.7036e-13							TMEM145				RAB7B	THRB									FGFBP1	1.08793	7.82802	2.84707	9.26e-24	1.4e-22	PLAC9P1	4.08411	0.149261	-4.77412	1.53e-29	4.77e-28
		SORCS3	CH17-472G23.1	GNG4	RP11-150O12.6		HIST1H4L	4.7245	-3.46289	6.486e-14	1.70484e-13							LHX2				AC010273.2	MGAM									RAB7B	2.05162	6.51423	1.66683	3.95e-19	3.52e-18	THRB	3.59482	1.64482	-1.12799	2e-22	2.56e-21
		RP11-445F12.2	MYPN	TEX26-AS1	TRIM80P		RAD21L1	3.50497	-1.64558	6.56042e-14	1.7239e-13							2018-03-04				WNT10A	SMIM14									AC010273.2	0.200653	0.515757	1.36199	7.41e-11	2.78e-10	MGAM	0.468872	0.13159	-1.83314	0.00488537	0.00713545
		CLEC2A	MTHFD2P1	IL17B	MLXIPL		KRTAP5-6	2.12087	-4.29276	6.65112e-14	1.74748e-13							DNASE1L2				HRCT1	TSPAN1									WNT10A	0.417296	1.75757	2.07444	1.99e-17	1.49e-16	SMIM14	42.8664	14.782	-1.536	1.59e-38	2.15e-36
		BMP2KL	ADRB3	RP11-66B24.9	LINC00709		TRIM67	2.27785	0.503817	6.77248e-14	1.7786e-13							GBX2				CEACAM1	RLN1									HRCT1	1.89689	18.2346	3.26497	3.03e-27	7.05e-26	TSPAN1	51.4939	7.33661	-2.81122	1.33e-37	1.48e-35
		CTD-2332E11.2	DNM1P47	TRIM67	SERPINA9		NDST4	4.6075	0.401798	7.14481e-14	1.87394e-13							CELSR3				GNLY	ENPP1									CEACAM1	5.85015	12.1312	1.05218	0.00105563	0.0016987	RLN1	0.365043	0.157814	-1.20984	1.19e-10	4.37e-10
		LINC01475	ADGRD2	DUSP9	PLAC9		MAGEA6	6.94103	1.90506	7.54912e-14	1.97598e-13							S100A14				IGKV2D-28	MIR4526									GNLY	1.44719	5.23067	1.85374	8.71e-10	2.9e-09	ENPP1	14.0381	3.46375	-2.01894	1.46e-39	2.46e-37
		RP11-107I14.5	CCL16	MDGA2	LGALS9C		PAGE5	4.05406	-1.47992	7.63355e-14	1.99693e-13							GPR19				PCP4L1	C14orf180									IGKV2D-28	1.13441	2.41371	1.08931	0.000868894	0.00141459	MIR4526	0.61827	0.104765	-2.56108	3.91e-15	2.3e-14
		RP5-1121A15.3	LINC01186	ALG1L3P	WI2-85898F10.2		MAGEC1	4.01972	-0.285983	8.39174e-14	2.1918e-13							PTK6				AL024507.2	PODN									PCP4L1	1.33575	3.35021	1.3266	4.79e-08	1.31e-07	C14orf180	0.276227	0.107916	-1.35595	1.53e-05	3.15e-05
		NEUROD4	CNTFR	RP11-145H9.3	KRT18P65		HRH3	3.01968	-1.8581	9.10503e-14	2.374e-13							PTGFR				ADORA2B	SEC14L2									AL024507.2	0.289396	0.601264	1.05495	3.38e-31	1.34e-29	PODN	13.2677	6.00425	-1.14386	2.34e-15	1.41e-14
		LINC02074	RP11-213H15.1	FAM163B	C1orf158		RGS7	2.13602	-0.549236	9.26575e-14	2.41418e-13							SMIM22				CXCL8	SFTPA2									ADORA2B	1.02395	2.23256	1.12455	1.9e-13	9.36e-13	SEC14L2	14.913	4.30738	-1.79169	3.93e-13	1.87e-12
		SNORD3B-1	SEMA3D	RP3-523C21.2	SLC24A2		HTR3A	2.67826	-0.605967	9.31129e-14	2.42534e-13							CCR8				IL4I1	AL512378.1									CXCL8	1.87889	5.71109	1.60388	2.15e-10	7.65e-10	SFTPA2	0.692211	0.178804	-1.95284	5.63e-09	1.71e-08
		NEUROG3	EGR3	RP11-435O5.6	CCDC158		CALML5	2.67341	6.32867	9.827e-14	2.55637e-13							SYNGR4				ADGRF1	AC004836.1									IL4I1	4.02075	8.90566	1.14726	8.45e-15	4.78e-14	AL512378.1	0.274789	0.0485018	-2.50221	1.03e-11	4.21e-11
		CTC-480C2.1	BOK-AS1	TF	MYL3		ADGRF2	2.26313	-2.66623	1.0737e-13	2.7891e-13							CADM3				MIR2116	AC025423.3									ADGRF1	0.135956	0.538504	1.98581	3.46e-07	8.59e-07	AC004836.1	0.351938	0.0977779	-1.84774	0.00613516	0.00885435
		FAM9C	CTC-255N20.1	IGHGP	MIR4526		VCX3A	5.17687	-1.61228	1.12956e-13	2.93168e-13							POSTN				B3GNT3	AC015813.1									MIR2116	0.180347	0.493484	1.45223	0.000100617	0.000186019	AC025423.3	1.364	0.0438814	-4.95809	7.46e-06	1.59e-05
		OR8G3P	CLCN1	MT1L	ANGPT4		TRPM8	2.63551	0.687872	1.17437e-13	3.04582e-13							CLPSL2				EEF1E1P1	THPO									B3GNT3	1.94636	7.42905	1.9324	2.67e-20	2.73e-19	AC015813.1	2.14315	1.01891	-1.0727	1.08e-14	6.04e-14
		C8orf17	LINC01894	RP11-820I16.1	OGN		KIRREL2	2.19916	-0.480622	1.17566e-13	3.04829e-13							HIST3H2BB				PLA2G2D	EFCC1									EEF1E1P1	0.250578	0.601416	1.2631	4.63e-19	4.09e-18	THPO	1.78675	0.168938	-3.40277	1.14e-32	5.86e-31
		LINC01446	AC147651.1	RP11-413E1.4	RP11-326C3.2		DMRTA2	3.06816	-1.96372	1.17599e-13	3.0487e-13							CPA2				MUC16	AC073850.1									PLA2G2D	2.10713	4.37548	1.05416	3.28e-06	7.26e-06	EFCC1	3.33497	0.610172	-2.45038	4.47e-34	2.88e-32
		AC015933.2	MIR27A	AC011239.1	POTED		ADAM18	4.10505	-3.25343	1.18198e-13	3.0638e-13							MYBPH				AC022075.1	LIN7A									MUC16	0.396461	1.88421	2.24871	3.5e-17	2.55e-16	AC073850.1	0.412931	0.182531	-1.17776	0.0101149	0.0141103
		AC005863.1	RNU6ATAC18P	KLF14	WASIR2		PRSS1	3.75817	0.058667	1.1879e-13	3.0787e-13							IFI6				TMEM217	CASD1									AC022075.1	0.31414	1.41178	2.16804	1.22e-13	6.13e-13	LIN7A	3.43703	0.670372	-2.35813	1.48e-19	1.39e-18
		RP11-336N8.4	RNU6-242P	CTD-2311M21.3	SCGB2A1		COL11A2	2.2739	3.12073	1.3416e-13	3.46714e-13							SRMS				MIR4653	AL136164.3									TMEM217	0.242042	0.623615	1.3654	4.09e-23	5.69e-22	CASD1	14.3552	5.34956	-1.42408	3.21e-24	5.1e-23
		PLA2G3	SYNE1-AS1	SERPINB11	RP11-304L19.12		HIST1H3A	2.04702	-2.19416	1.45717e-13	3.75779e-13							FAT2				TNFRSF10D	TPSP2									MIR4653	2.95781	9.60529	1.6993	1.43e-23	2.11e-22	AL136164.3	0.279709	0.0905333	-1.62741	2.07e-08	5.88e-08
		SNORA37	RP11-361I14.2	RBPJL	ATXN8OS		SYT9	2.02273	3.29703	1.56142e-13	4.01807e-13							CCL21				IGKV1-39	BCAS1									TNFRSF10D	0.848467	1.98934	1.22936	2.49e-05	4.97e-05	TPSP2	5.09199	0.853186	-2.5773	1.02e-33	6.12e-32
		RP11-774D14.1	LINC01088	UNC80	RP4-730D4.1		KRT34	4.34596	-2.67521	1.56492e-13	4.02652e-13							RPE65				THEMIS2	AC084026.1									IGKV1-39	2.28844	7.96585	1.79946	6.7e-06	1.43e-05	BCAS1	6.70478	0.574997	-3.54356	8.03e-43	3.1e-40
		KRTAP17-1	CTD-2003C8.2	RP11-366H4.1	RP11-284F21.10		APCS	7.49496	-1.3313	1.76517e-13	4.53019e-13							HOXC13				ACAN	SCUBE2									THEMIS2	4.01399	8.45338	1.07449	1.02e-18	8.65e-18	AC084026.1	0.507946	0.0788319	-2.68782	1.97e-12	8.7e-12
		LCE2D	SLC7A14	KRT81	POU4F3		PADI1	2.20473	-2.00843	1.77151e-13	4.5452e-13							DPEP1				AC139453.1	SLC22A4									ACAN	0.481372	1.13995	1.24374	6.77e-07	1.62e-06	SCUBE2	61.9046	3.78994	-4.0298	1.46e-39	2.46e-37
		U82695.5	RNASE7	KCNA2	LINC00613		ZMAT4	2.12915	1.12214	1.82503e-13	4.67589e-13							INMT-MINDY4				LINC00346	CREB3L1									AC139453.1	0.647888	1.32646	1.03376	2.79e-07	7e-07	SLC22A4	2.2067	0.863828	-1.35307	8.63e-24	1.31e-22
		LCE2C	RP11-419J16.1	RP11-134N1.2	RP11-133F8.2		FOXA3	2.22749	0.273649	1.88355e-13	4.82107e-13							JAKMIP1				AP001207.3	ANO2									LINC00346	0.839146	1.72756	1.04174	1.32e-10	4.81e-10	CREB3L1	21.8586	8.63679	-1.33963	4.25e-21	4.71e-20
		RP11-555J4.4	GLDN	LINC00461	SSTR5		S100G	4.70099	1.04316	1.93349e-13	4.94472e-13							CAPZA3				CLDN10	GLRA3									AP001207.3	2.09592	4.84752	1.20966	1.21e-13	6.06e-13	ANO2	0.84832	0.344996	-1.29803	0.00203473	0.00314886
		VRTN	LMX1A	LINC00452	FLJ12825		PGLYRP2	2.1945	2.97839	2.05503e-13	5.24814e-13							CCNE1				AC139453.2	FFAR2									CLDN10	0.124488	2.85067	4.51722	3.37e-05	6.61e-05	GLRA3	1.43512	0.109598	-3.71088	4.26e-05	8.28e-05
		RP11-347E10.1	GFAP	CA9	KIAA1683		IGSF23	2.32671	-2.07732	2.18441e-13	5.57308e-13							CHST9				STRA8	TRERF1									AC139453.2	0.784547	2.1189	1.43338	2.9e-13	1.4e-12	FFAR2	1.95723	0.458915	-2.09251	3.76e-23	5.27e-22
		RNU1-72P	LINC01412	OR7E116P	SMIM6		HIST2H2AA4	2.14843	-4.24686	2.44551e-13	6.22523e-13							CAMP				PVR	TPSG1									STRA8	0.272959	1.15684	2.08343	1.75e-28	4.83e-27	TRERF1	4.87096	1.96202	-1.31187	1.69e-27	4.1e-26
		RNU1-52P	RP11-715H19.2	AC073150.6	UGT2B17		NPBWR1	2.98047	-2.77845	2.71548e-13	6.89696e-13							CNTD2				LINC02473	APELA									PVR	6.36225	13.8157	1.1187	3.24e-29	9.74e-28	TPSG1	3.88655	0.0756565	-5.68288	1.68e-39	2.8e-37
		MAGEB16	GABRE	RPL12P7	RP11-354P11.2		CYP2A6	3.56083	5.70399	2.78751e-13	7.07397e-13							ADGRL3				SLC16A1	SSH3									LINC02473	0.151463	0.583323	1.94533	5.17e-18	4.08e-17	APELA	0.384618	0.181409	-1.08418	2.76e-06	6.16e-06
		LINC01425	bP-21264C1.1	S100A9	RP11-731F5.2		DKK1	2.1718	2.73422	3.01051e-13	7.62815e-13							NKAIN1				LBP	LINC01117									SLC16A1	6.16602	15.6299	1.3419	8.39e-17	5.89e-16	SSH3	22.2698	10.2411	-1.12072	7.4e-31	2.79e-29
		RP11-398B16.2	ASB4	LINC00518	GPIHBP1		CALY	2.05201	-1.78169	3.37316e-13	8.52091e-13							DCT				ST3GAL6	RIMS4									LBP	8.63995	43.8664	2.34402	0.000242905	0.000426853	LINC01117	1.73544	0.291381	-2.57433	1.42e-38	1.99e-36
		GNAT3	FFAR3	ERFE	CGA		SLC24A5	2.03392	-4.132	3.87623e-13	9.7686e-13							SLC16A12				IGKV4-1	TPO									ST3GAL6	0.993416	2.7684	1.47858	3.19e-28	8.49e-27	RIMS4	7.70437	0.482498	-3.99708	1.2e-22	1.58e-21
		TAGLN3	CTB-35F21.4	SIX3-AS1	ASPN		IL36RN	3.0532	-1.71281	4.28162e-13	1.07678e-12							FBN2				SERPINE2	CMBL									IGKV4-1	147.688	678.347	2.19947	1.52e-07	3.91e-07	TPO	0.418219	0.170701	-1.29278	6.59e-23	8.96e-22
		WFDC6	RGS7BP	IGHV3-23	SORCS1		TBR1	3.04677	-2.10541	4.3568e-13	1.09508e-12							SLC7A5				AC092851.1	DNAJC22									SERPINE2	4.44516	12.3106	1.4696	7e-14	3.62e-13	CMBL	27.5943	7.33383	-1.91173	3.74e-39	5.84e-37
		KPRP	LINC00906	RP11-671M22.4	DLX2		CEACAM7	2.02039	0.173722	4.38425e-13	1.10183e-12							HIST1H2BC				GFRA3	GCNT4									AC092851.1	0.231816	0.523598	1.17548	3.15e-05	6.22e-05	DNAJC22	4.38328	2.07776	-1.07698	1.71e-16	1.16e-15
		DSCR4	CLEC4GP1	C21orf62	LRRC71		ANKRD30B	2.20825	3.57566	4.39717e-13	1.10492e-12							STARD10				KCNK5	FRS2									GFRA3	0.224639	5.37494	4.58057	5.66e-29	1.64e-27	GCNT4	0.881722	0.353842	-1.31722	5.29e-12	2.24e-11
		OR7E156P	CNTFR-AS1	ACTL8	LINC01639		MAGEA10	5.50658	-0.61799	4.91098e-13	1.23182e-12							ANKRD22				IGHV4-59	MINDY4B									KCNK5	2.86813	15.8676	2.4679	8.94e-35	6.26e-33	FRS2	12.8659	4.66115	-1.4648	1.05e-30	3.85e-29
		FGF21	CADM3	RP11-735G4.1	TMEM121		CDHR4	2.3262	-0.373233	5.09771e-13	1.27706e-12							RTBDN				EZH2	MIR3178									IGHV4-59	51.3688	135.663	1.40106	1.53e-06	3.53e-06	MINDY4B	0.594887	0.0892759	-2.73627	5.16e-22	6.33e-21
		RN7SL408P	RP11-88I18.3	PROX1-AS1	GUSBP3		AMTN	3.58713	0.0878984	5.44331e-13	1.36195e-12							CBX2				AC016735.1	TIMP3									EZH2	5.26778	11.1483	1.08156	6.46e-26	1.26e-24	MIR3178	0.380467	0.166177	-1.19505	6.18e-07	1.49e-06
		RN7SKP219	TEX26	TRIM50	WDR38		KRTDAP	3.37273	1.59165	5.73336e-13	1.43275e-12							TMEM92				GSTP1	TP53INP1									AC016735.1	0.28675	3.26608	3.50969	7.35e-26	1.43e-24	TIMP3	3.89582	1.85894	-1.06744	1.32e-13	6.59e-13
		DLGAP1-AS3	RP11-286B14.1	CRABP1	RP11-486M23.3		FAM163B	2.67289	-3.10705	6.25832e-13	1.56071e-12							HOXC11				AC008514.1	PRLR									GSTP1	77.3754	222.389	1.52314	1.63e-32	8.17e-31	TP53INP1	25.0742	8.16714	-1.6183	4.98e-41	1.22e-38
		SCRT2	RP11-65J21.4	IGKV3-15	ELK2AP		GFY	3.14233	-2.44415	6.46043e-13	1.60891e-12							MYBPC1				MDFI	C5AR2									AC008514.1	0.134327	1.80969	3.75192	4.65e-38	5.68e-36	PRLR	24.0529	8.69974	-1.46717	5.22e-27	1.17e-25
		RP11-235G24.3	INMT-MINDY4	RP11-269F21.3	NLRP13		CRISP1	3.35537	-2.76176	6.69598e-13	1.66619e-12							HIST1H2BJ				ADAMTS3	KIAA1324L									MDFI	10.2987	29.721	1.52902	5.84e-16	3.76e-15	C5AR2	3.91391	0.384523	-3.34747	9.88e-47	1.08e-43
		RP11-83A16.1	CERS3-AS1	LINC01186	PCDH10		CRCT1	5.8326	-1.94958	6.95221e-13	1.72806e-12							HIST2H2BE				IGLV2-18	KITLG									ADAMTS3	0.285609	0.808124	1.50053	5.25e-16	3.4e-15	KIAA1324L	3.2678	1.56767	-1.0597	5.67e-16	3.65e-15
		AC004158.3	MYBPH	LINC02086	P2RY4		OR1F1	3.5159	-3.59631	7.38649e-13	1.83274e-12							MUC1				RPS7P10	RASEF									IGLV2-18	6.78015	16.192	1.25589	0.038497	0.0491322	KITLG	16.5168	4.26285	-1.95405	5.33e-31	2.08e-29
		CCDC175	LINC01908	FDCSP	AE000661.37		GPR52	2.63963	-3.35754	7.56087e-13	1.87396e-12							GRIN2D				CHST2	FBXO15									RPS7P10	1.08976	2.2084	1.01899	2.37e-16	1.59e-15	RASEF	13.3163	4.31366	-1.62621	1.27e-33	7.36e-32
		APOBEC1	ADGRL3	KCNV1	FRY-AS1		PBOV1	2.30366	-2.48505	7.8237e-13	1.93752e-12							METTL21C				AKR1C2	FBXO36									CHST2	1.48825	5.00682	1.75027	1.99e-25	3.63e-24	FBXO15	0.427812	0.159084	-1.42719	3.12e-25	5.56e-24
		C10orf113	MIR6503	GDF5OS	UNC5A		SP7	3.26588	-0.834082	8.52218e-13	2.10775e-12							C2CD4B				PLCH1	SCN7A									AKR1C2	2.05054	6.4632	1.65625	0.000332108	0.000572609	FBXO36	2.69261	1.00568	-1.42084	3.27e-35	2.44e-33
		FGG	RPE65	NAMA	LINC01879		KCNJ4	2.8854	-3.00336	8.66219e-13	2.14166e-12							LRRC46				CNNM1	ARMC4									PLCH1	1.3513	4.72907	1.80721	1.96e-29	6e-28	SCN7A	0.419121	0.100092	-2.06604	4.85e-22	5.97e-21
		CCDC92B	AC016995.3	OTX2	HYPM		C2CD4A	2.25308	2.50831	8.81917e-13	2.17928e-12							MRLN				RPRM	MUC2									CNNM1	0.179768	0.578013	1.68496	3.24e-15	1.92e-14	ARMC4	0.247522	0.120484	-1.03872	5.14e-08	1.4e-07
		RN7SKP71	CAPZA3	RP11-456H18.2	RP11-387H17.4		PIH1D3	2.32686	-3.12467	8.94591e-13	2.2103e-12							CAPS				NWD1	GPR160									RPRM	0.171444	0.946924	2.46551	0.000200522	0.000355935	MUC2	1.55331	0.0718545	-4.43412	0.000433727	0.000736584
		RP11-775J23.2	FAT2	GALNT14	ABCC13		VSTM2A	4.03225	4.64398	8.9476e-13	2.21042e-12							SGCG				AC011247.1	C4B									NWD1	0.25828	0.622852	1.26996	5.59e-13	2.62e-12	GPR160	13.9623	5.21658	-1.42036	3.31e-31	1.32e-29
		TBX20	MRLN	LINC01152	MARK2P5		ITLN2	3.11743	-2.80569	8.98497e-13	2.21905e-12							TRPA1				AL121760.1	AL137847.1									AC011247.1	0.615626	5.10473	3.05171	5.18e-23	7.13e-22	C4B	13.0385	2.96823	-2.1351	1.28e-26	2.7e-25
		PCSK2	C2CD4B	SLC30A3	NEUROG3		FIBCD1	2.02595	1.8027	9.24358e-13	2.28044e-12							PLCXD3				VASN	ANO1									AL121760.1	0.211183	0.935556	2.14733	4.96e-17	3.55e-16	AL137847.1	0.454516	0.181336	-1.32566	9.1e-20	8.72e-19
		RP11-1112C15.2	OR7E13P	RP3-522D1.1	RP11-434D2.9		MAGEA11	3.57615	-1.47728	9.59079e-13	2.3635e-12							HAS1				AMTN	AC006111.3									VASN	8.32535	17.0835	1.03702	3.81e-17	2.76e-16	ANO1	30.0489	13.2095	-1.18573	4.18e-15	2.45e-14
		NAALADL2-AS2	KLF14	MAEL	TMPRSS7		GIP	3.36324	-3.21377	9.59981e-13	2.3651e-12							HIST1H4D				ODC1	LINC00052									AMTN	0.377402	6.21435	4.04143	3.13e-19	2.82e-18	AC006111.3	0.261035	0.120057	-1.12053	1.27e-10	4.63e-10
		UHRF2P1	RP11-535A19.1	LRRC74A	RP11-1252I4.2		LRRC31	2.38796	2.66449	1.03222e-12	2.53758e-12							ZMYND10				AL354718.3	LY6H									ODC1	15.1511	39.9329	1.39816	3.6e-35	2.66e-33	LINC00052	2.88594	0.297134	-3.27986	1.06e-06	2.49e-06
		RP11-320G10.1	LINC01484	OR7E62P	UCN3		DCAF8L2	4.56318	-2.99336	1.05557e-12	2.59357e-12							HRASLS5				AP001542.3	NLRP6									AL354718.3	0.181348	0.385267	1.08709	7.83e-11	2.92e-10	LY6H	0.527412	0.245631	-1.10244	2.61e-07	6.57e-07
		GCG	RNU6-1189P	MMP1	RP11-588L15.2		SLC4A10	2.43466	1.1826	1.11097e-12	2.72415e-12							LRRC73				SNX22	RHOH									AP001542.3	0.97898	2.8455	1.53933	1.29e-29	4.08e-28	NLRP6	0.285397	0.116865	-1.28813	1.26e-06	2.92e-06
		S100A7	HRASLS5	RP11-91I8.3	LINC01653		NTSR1	2.04347	-1.02113	1.17785e-12	2.88425e-12							TEX26				FAM124A	SCGB2A1									SNX22	1.19532	3.16399	1.40435	4.04e-10	1.4e-09	RHOH	4.84205	1.76456	-1.45631	8.24e-16	5.21e-15
		OLIG1	RP11-481J13.1	RP11-90C4.1	RUNDC3A-AS1		ZIC1	2.44248	2.08852	1.31929e-12	3.22192e-12							KLK4				IGHV1-46	SOWAHA									FAM124A	0.434769	0.953502	1.13299	7.49e-14	3.86e-13	SCGB2A1	81.5525	9.20714	-3.1469	1.26e-08	3.68e-08
		ZNF280A	NOS1	LYZ	ATP8A2		HIST1H1A	3.83431	-3.26717	1.3949e-12	3.40337e-12							ITIH2				GPR63	SPTBN4									IGHV1-46	22.9736	70.9247	1.62631	3.4e-06	7.52e-06	SOWAHA	3.85213	0.514282	-2.90503	6.1e-27	1.35e-25
		CT83	BMPER	SLC22A31	RNF223		C10orf82	2.21483	2.45237	1.40473e-12	3.42689e-12							ENTHD1				RIMS3	TNN									GPR63	0.215434	0.540292	1.32649	1.17e-08	3.43e-08	SPTBN4	0.501927	0.111578	-2.16943	1.65e-31	7.01e-30
		MOG	MYOG	PTN	LINC01490		INS	5.89399	-2.34821	1.49003e-12	3.63205e-12							GABRG1				EPHB1	CTD-2201I18.1									RIMS3	0.821722	1.87075	1.1869	6.46e-16	4.15e-15	TNN	2.61205	1.13842	-1.19814	3.38e-10	1.18e-09
		RN7SL660P	RP11-486L19.2	FAM205C	F2RL2		GAGE2A	5.84667	-2.75007	1.64942e-12	4.01303e-12							MYT1				ELFN1-AS1	AC118658.1									EPHB1	0.39318	1.72829	2.13608	3.08e-21	3.48e-20	CTD-2201I18.1	0.332261	0.130723	-1.34581	1.58e-14	8.73e-14
		RP11-34C15.2	RP11-407P15.1	RP11-57A1.1	RP11-1123I8.1		BEX1	2.809	3.76774	1.7041e-12	4.14274e-12							OR2L13				MYRF	DCDC1									ELFN1-AS1	0.726193	2.4233	1.73855	6.55e-09	1.97e-08	AC118658.1	0.378148	0.127871	-1.56426	2.21e-05	4.43e-05
		RP11-174F8.1	MYF6	RP11-657O9.1	SCRT1		SVOP	3.41865	-1.16044	1.72128e-12	4.18283e-12							APOBEC3B				POLR2J4	MIR149									MYRF	0.264708	0.619768	1.22733	4.37e-14	2.3e-13	DCDC1	0.369789	0.0428482	-3.1094	1.22e-30	4.42e-29
		RP11-269G24.2	CYP4F24P	RP11-80H8.4	GAPDHP71		KRT35	3.57042	-2.51079	1.77937e-12	4.32166e-12							MAS1L				SLC2A12	TEKT2									POLR2J4	0.437313	0.97834	1.16167	1.01e-36	9.83e-35	MIR149	0.632759	0.0398708	-3.98825	9.03e-16	5.69e-15
		RN7SL342P	MIR221	PRDM13	RP11-486M23.2		FGF4	7.14789	0.202798	1.79693e-12	4.36315e-12							C10orf90				MFGE8	GRPR									SLC2A12	0.417373	1.62793	1.96363	6.52e-19	5.68e-18	TEKT2	0.922437	0.376977	-1.29097	1.94e-09	6.19e-09
		RP11-654A16.1	RP11-381N20.2	Six3os1_1	RP11-284F21.7		PAGE1	6.59355	-1.2622	2.04703e-12	4.95055e-12							ACTL8				AC022509.2	RN7SL674P									MFGE8	15.7516	73.1747	2.21584	9.26e-27	2e-25	GRPR	8.42168	0.305226	-4.78616	3.25e-38	4.08e-36
		MAGEB2	CHL1-AS1	KRT17P8	FAM183A		PNMT	2.5782	3.52878	2.09077e-12	5.05229e-12							IGFL2				NT5DC2	AC005899.7									AC022509.2	1.12395	3.10616	1.46655	1.8e-06	4.1e-06	RN7SL674P	2.58558	1.01921	-1.34303	5.04e-16	3.27e-15
		GPR6	SLC14A2-AS1	MYEOV	KNG1		IFITM5	3.47107	-1.1568	2.3799e-12	5.73572e-12							SYT13				EIF4EBP1	AC120036.3									NT5DC2	9.85607	22.7399	1.20614	2.28e-28	6.18e-27	AC005899.7	0.382433	0.129977	-1.55695	1.76e-19	1.64e-18
		AC006262.11	MIR7152	PF4V1	SYT13		SSX1	5.91947	-0.568748	2.70917e-12	6.51025e-12							IGFL3				UBE2C	C16orf71									EIF4EBP1	47.6641	96.6367	1.01967	2.08e-18	1.71e-17	AC120036.3	0.343845	0.114802	-1.58262	2.92e-06	6.49e-06
		GC	MRPL15P1	PAGE2	RNU1-94P		LRRC53	4.86264	-1.03989	2.71224e-12	6.51591e-12							MYOG				KRT79	LRRC73									UBE2C	27.7647	65.549	1.23932	2.79e-22	3.53e-21	C16orf71	0.988877	0.342895	-1.52802	6.08e-30	2.02e-28
		RNU1-77P	RP4-737E23.5	RP11-479J7.2	RNA5-8SP6		VCX	3.42519	-2.21385	2.83365e-12	6.80398e-12							MYF6				CNGA1	C1orf194									KRT79	0.496279	11.0857	4.4814	4.41e-08	1.21e-07	LRRC73	1.68063	0.615747	-1.44859	4.08e-20	4.07e-19
		RNU6-438P	ITIH2	SV2C	CTSG		MC5R	2.58159	-2.86867	2.90239e-12	6.96628e-12							NOS1				CCDC82	SEZ6L									CNGA1	0.316763	1.45703	2.20155	1.53e-25	2.86e-24	C1orf194	0.717902	0.256527	-1.48468	3.63e-10	1.26e-09
		PAX7	IL17B	CACNA1B	RP11-470C13.4		PDCL2	3.66847	-3.91596	3.0283e-12	7.25698e-12							BMPER				TEX30	KRT24									CCDC82	1.36329	3.19096	1.2269	1.29e-35	1.03e-33	SEZ6L	1.74864	0.0697639	-4.64761	1.4e-26	2.96e-25
		MROH4P	RP11-598F7.4	LINC01973	PLA2G4F		LPO	2.05235	-0.267789	3.13058e-12	7.49711e-12							ACAN				ZNF695	HAR1B									TEX30	3.63401	8.04926	1.14729	1.21e-25	2.3e-24	KRT24	0.631693	0.0130008	-5.60255	1.32e-14	7.33e-14
		ZEB2P1	LA16c-329F2.1	KRT17	GAD1		LCE2B	5.80324	-2.84354	3.67897e-12	8.7826e-12							SHOX				FOXC2	GNAQP1									ZNF695	0.498929	1.60419	1.68494	1.09e-29	3.49e-28	HAR1B	0.365769	0.145346	-1.33144	0.0159927	0.0216215
		XAGE2	PLPPR1	MAGEB10	VSTM2A-OT1		CT45A10	5.16984	-2.90737	3.71773e-12	8.87163e-12							ERMN				MMP1	CCDC170									FOXC2	0.674054	3.31218	2.29684	1.55e-06	3.56e-06	GNAQP1	1.78254	0.418612	-2.09025	1.39e-18	1.16e-17
		HMX3	NLGN1	GS1-166A23.1	RP11-91H12.4		RNF113B	2.76171	-3.35968	3.7734e-12	9.00212e-12							TRPM1				TUBB6	EFCAB6									MMP1	14.0619	32.2266	1.19646	6.3e-10	2.13e-09	CCDC170	5.73627	0.488234	-3.55447	1.75e-46	1.72e-43
		RN7SL483P	CALB2	GABRE	MED15P5		CDH18	3.17924	-0.589654	4.42044e-12	1.05057e-11							ULBP1				NCAPD2	MISP									TUBB6	11.5479	24.6561	1.09432	2.08e-23	3.01e-22	EFCAB6	0.460631	0.166574	-1.46745	7.95e-32	3.6e-30
		RN7SL217P	RP3-525N10.2	CSAG3	CCDC114		SCN1A	3.34043	0.0315193	4.45048e-12	1.05743e-11							RIIAD1				LINC01215	AC022196.1									NCAPD2	13.8739	30.9778	1.15886	3.08e-19	2.77e-18	MISP	18.0042	3.91864	-2.19991	1.08e-33	6.41e-32
		RP11-317N12.1	LINC01532	PPY2P	RP11-616M22.11		B4GALNT2	2.38782	2.44887	4.46296e-12	1.06026e-11							CIB3				Z84484.1	ASTN2									LINC01215	0.208057	0.478055	1.2002	1.57e-06	3.61e-06	AC022196.1	0.357071	0.0152549	-4.54886	9.16e-19	7.84e-18
		KRT38	AQP4	LINC02195	GTF3AP6		TRIM15	2.81835	-2.73058	4.47028e-12	1.06186e-11							CFB				PROSER2-AS1	RNU6-833P									Z84484.1	0.216948	0.771939	1.83114	1.53e-18	1.27e-17	ASTN2	3.21333	1.01912	-1.65674	7.14e-29	2.06e-27
		RP11-274J7.2	AL161668.5	GS1-24F4.2	CH507-210P18.1		DLX6	2.40379	-0.42951	4.53149e-12	1.07556e-11							HIST1H3B				DMD	AL449106.1									PROSER2-AS1	0.207906	0.875847	2.07474	0.00067837	0.00112146	RNU6-833P	0.814469	0.324981	-1.3255	2.23e-11	8.84e-11
		FGF7P1	TPPP2	RP11-20J15.3	NEGR1		PGLYRP3	4.00982	-2.25804	4.55337e-12	1.08032e-11							LINGO1				LINC01198	SCARNA13									DMD	0.700314	2.05259	1.55137	4.17e-14	2.2e-13	AL449106.1	0.370473	0.100479	-1.88247	1.27e-28	3.56e-27
		PCMTD1P3	RP11-34A14.3	RP11-544M22.8	AGAP11		C12orf56	2.33911	-1.20212	4.56049e-12	1.08173e-11							MYOC				RHEX	NUDT16P1									LINC01198	0.0985149	0.867348	3.1382	2.97e-35	2.24e-33	SCARNA13	20.9828	3.79738	-2.46613	0.0022233	0.00341782
		LINC00867	SLC4A1	CD207	MYL2		PRR27	6.11618	1.28535	4.89499e-12	1.1588e-11							KCNA1				ABRACL	PDZRN4									RHEX	0.642484	4.86611	2.92104	0.000122107	0.000223127	NUDT16P1	2.1426	0.862981	-1.31196	1.19e-13	5.97e-13
		RP11-434I12.3	RAPGEF4-AS1	KLRG2	TTC29		CROCC2	2.14527	-1.01417	5.01428e-12	1.18673e-11							DNAAF3				PLOD1	AC078864.1									ABRACL	30.5203	73.0166	1.25845	4.14e-29	1.23e-27	PDZRN4	0.576594	0.108992	-2.40333	6.62e-10	2.23e-09
		RNU4ATAC16P	C11orf87	CARD18	FNDC11		CYP2A13	3.41443	-1.18534	5.24557e-12	1.24082e-11							OASL				AC020661.1	PCSK4									PLOD1	29.3351	77.4366	1.40039	2.94e-36	2.59e-34	AC078864.1	0.828429	0.333031	-1.31472	3.9e-11	1.5e-10
		OCSTAMP	RP11-536I6.2	FAM181A	MCCD1		TEKT1	2.17632	-0.684041	5.41225e-12	1.27975e-11							ASTN1				AC012236.1	RABEP1									AC020661.1	0.198564	0.549892	1.46954	1.59e-27	3.88e-26	PCSK4	1.67674	0.499311	-1.74765	1.42e-28	3.93e-27
		RNU1-96P	AADAC	IL1R2	WASF5P		TM4SF5	4.3727	-3.01115	5.46566e-12	1.29221e-11							CNTNAP2				LIMD2	TFAP2B									AC012236.1	0.336763	0.904592	1.42554	4.55e-10	1.56e-09	RABEP1	32.8341	10.4466	-1.65216	1.17e-42	4.25e-40
		MYT1L	GDA	PGLYRP4	CBLN2		LYZL2	2.61867	-2.57046	5.56382e-12	1.31491e-11							LYPD1				CD1A	AC017048.3									LIMD2	4.03889	8.34828	1.04752	3.85e-19	3.43e-18	TFAP2B	14.1882	7.00812	-1.01759	3.7e-08	1.02e-07
		ANKRD66	PF4	IGLV6-57	AC015987.1		UGT2B4	3.85323	3.03437	5.57808e-12	1.31811e-11							CDKN2A				AC013457.1	LINC02489									CD1A	0.677321	1.91056	1.49609	2.4e-05	4.79e-05	AC017048.3	0.678723	0.144075	-2.236	1.94e-28	5.31e-27
		RP11-319E12.1	TMEFF2	RTP3	SNORD94		MAGEA4	5.8341	2.14601	6.48887e-12	1.52895e-11							ACTC1				C1QL4	ACADSB									AC013457.1	0.0505049	3.5398	6.1311	3e-20	3.04e-19	LINC02489	0.996244	0.129884	-2.93928	7.62e-26	1.48e-24
		KRTAP21-2	RNA5SP515	PADI3	F2		GAGE1	5.35966	-2.90917	7.07079e-12	1.6624e-11							FOXH1				RAD51B	SGK3									C1QL4	0.192227	1.53682	2.99907	7.31e-27	1.6e-25	ACADSB	21.6067	4.58011	-2.23803	1.9e-38	2.51e-36
		RP11-115F18.1	RP11-92A5.2	AC079354.5	RN7SL767P		ALPP	3.40243	-3.00724	7.07288e-12	1.66246e-11							KISS1R				SOX11	HSPB8									RAD51B	1.03221	2.23461	1.11429	0.000136265	0.000247254	SGK3	6.62518	3.13816	-1.07804	1.22e-07	3.18e-07
		NPY	HS3ST4	DKK4	CTB-164N12.1		NEUROD1	5.86852	-1.62619	7.92977e-12	1.86018e-11							FAM57B				SOX9-AS1	AC020978.4									SOX11	1.43356	6.02816	2.07211	5.47e-22	6.69e-21	HSPB8	22.4053	7.1687	-1.64406	7.24e-14	3.74e-13
		RP11-184J23.2	SGCZ	RP11-748L13.2	NDP		HDC	2.22353	3.59481	8.29355e-12	1.94308e-11							LRTM2				CPNE8	HOXC4									SOX9-AS1	0.261091	1.62148	2.63468	1.32e-31	5.76e-30	AC020978.4	0.653549	0.265222	-1.30109	1.02e-15	6.4e-15
		FOXCUT	LINC01612	CLEC4M	UGT3A1		SYT14	2.09508	-0.165088	8.40315e-12	1.968e-11							CSMD2				IGKV1-6	NPAS1									CPNE8	1.23863	2.48143	1.00242	2.95e-12	1.28e-11	HOXC4	4.16539	1.87329	-1.15288	1.83e-16	1.24e-15
		LCE2A	RP11-583F24.7	CES5AP1	CHCHD3P1		BPIFB4	3.57862	-1.60019	9.56577e-12	2.23509e-11							HIST1H4E				SERPINB4	ELN-AS1									IGKV1-6	24.7576	53.1244	1.1015	9.5e-05	0.000176251	NPAS1	0.765059	0.245876	-1.63764	1.63e-24	2.68e-23
		LINC01470	AADACL3	NMU	IQCJ		GABRG2	5.45987	-0.345744	1.00605e-11	2.34737e-11							HIST1H2BF				POU5F1	KLK3									SERPINB4	0.0754262	2.27951	4.91751	7.4e-17	5.22e-16	ELN-AS1	2.6085	0.737732	-1.82205	2.93e-24	4.69e-23
		AC006262.10	LINC01886	CYCSP6	RP3-414A15.10		PNMA5	2.7299	-0.61261	1.02979e-11	2.40059e-11							ETV7				LINC02541	DOC2A									POU5F1	0.196765	1.04727	2.41209	1.75e-36	1.61e-34	KLK3	0.55735	0.0868216	-2.68246	0.00297007	0.00448349
		RP11-665C16.1	RP11-378A12.1	FBN2	RP11-322I2.1		CARTPT	6.78992	7.04667	1.09983e-11	2.56059e-11							FAM72C				ADTRP	AL161716.1									LINC02541	0.27319	0.55755	1.0292	1.68e-06	3.85e-06	DOC2A	0.864133	0.377467	-1.1949	8.71e-12	3.6e-11
		TGIF2LX	RP13-392I16.1	RP11-485F13.1	RP11-497G19.1		C7orf33	3.33352	-3.82658	1.11923e-11	2.60479e-11							NPW				SNORC	AC010203.1									ADTRP	0.615249	1.48413	1.27037	8.33e-06	1.76e-05	AL161716.1	0.292527	0.088932	-1.71779	5.44e-14	2.84e-13
		RHCG	RP11-977P2.1	Six3os1_2	GIP		IL21	2.35974	-3.7632	1.14369e-11	2.65759e-11							CRABP2				SIGLEC12	C5orf30									SNORC	0.910968	4.95817	2.44433	4.12e-11	1.58e-10	AC010203.1	0.692828	0.327873	-1.07936	2.04e-17	1.52e-16
		BNIP3P8	SPHKAP	CTB-186G2.4	KRT18P21		POU4F1	3.25005	-1.0494	1.1465e-11	2.66342e-11							HIST2H2BF				CLPS	AL512599.1									SIGLEC12	0.194085	0.496183	1.35419	4.47e-07	1.09e-06	C5orf30	13.5559	5.10412	-1.40918	4.52e-38	5.56e-36
		RNU1-29P	OSTN	UNC93A	RP11-364P22.1		ATP2B3	2.35403	-2.01357	1.15681e-11	2.6867e-11							CLDN8				PDSS1	AC094019.1									CLPS	0.630587	1.47318	1.22417	0.000529633	0.000888565	AL512599.1	3.43192	0.253421	-3.75941	1.2e-09	3.91e-09
		AC106875.1	PIGR	NCCRP1	SNORA20		TACR3	2.15933	-2.13989	1.16044e-11	2.69444e-11							MAPK15				FOLR1	PRRT3									PDSS1	2.8017	6.73226	1.26479	3.52e-36	3.07e-34	AC094019.1	0.443311	0.117873	-1.91109	6.93e-19	6.02e-18
		RP11-583F2.5	MYOD1	ATP5G1P6	SLC25A24P1		LCE1B	5.36421	-2.66776	1.1794e-11	2.73741e-11							SPEF1				DGCR5	PEX11A									FOLR1	3.80321	18.2992	2.26649	3.91e-15	2.3e-14	PRRT3	5.72043	1.71197	-1.74047	4.04e-37	4.25e-35
		RPL23AP23	RP11-83M16.5	IGLV3-9	KRT8P45		LHFPL4	2.53412	-0.320622	1.20268e-11	2.79001e-11							MROH6				QRFP	KCTD3									DGCR5	0.173853	0.722051	2.05423	2.38e-24	3.83e-23	PEX11A	11.5552	5.19735	-1.15269	8.93e-30	2.89e-28
		RNU1-130P	FABP9	IGFBPL1	AGXT2		CST9L	3.10637	-1.23391	1.26494e-11	2.93183e-11							GMNC				XDH	ANKRA2									QRFP	0.185089	0.393	1.08631	8.66e-16	5.47e-15	KCTD3	48.465	19.4512	-1.31708	4.61e-37	4.73e-35
		TMEM108-AS1	LINC00603	ICOS	RP11-53B2.6		IAPP	6.68553	-0.950538	1.30497e-11	3.02268e-11							LRFN2				SLC25A37	CHRNA6									XDH	1.6714	11.2503	2.75084	2.95e-06	6.57e-06	ANKRA2	7.16335	3.44267	-1.05711	2.53e-38	3.23e-36
		KLF2P3	MRGPRX3	DGCR9	PIH1D3		CSH2	3.85768	-3.89488	1.42326e-11	3.29247e-11							HIST1H4H				AC012645.3	AC109927.1									SLC25A37	4.52144	11.3567	1.32869	6.48e-27	1.43e-25	CHRNA6	0.669577	0.157638	-2.08664	2.34e-12	1.02e-11
		ASTN2-AS1	RP11-14K3.7	LBP	CADM2		VWC2L	2.72333	-2.67713	1.4618e-11	3.37947e-11							CXCL9				AC243964.3	SAXO2									AC012645.3	0.234896	0.510915	1.12106	1.3e-07	3.37e-07	AC109927.1	0.314319	0.0697028	-2.17294	2.8e-10	9.83e-10
		UGT2A1	CDH12	PRSS51	CFC1		HIST2H3C	3.73573	-3.59133	1.50449e-11	3.4755e-11							DMBX1				USP49	KCNF1									AC243964.3	1.79589	3.94763	1.13629	1.21e-23	1.81e-22	SAXO2	0.747345	0.315085	-1.24603	3.45e-17	2.51e-16
		RN7SKP227	EDN3	RP11-608O21.1	CROCC2		PRSS33	3.88054	0.896369	1.68833e-11	3.88979e-11							TGFBR3L				ATP11A	LINC01522									USP49	0.900853	1.92211	1.09333	6.37e-10	2.15e-09	KCNF1	4.7895	0.599819	-2.99728	1.15e-10	4.22e-10
		BPIFB2	LINC00844	C2orf71	RBFOX1		RAX	2.47639	-3.86676	1.73741e-11	4.00187e-11							HIST2H2AC				RASGEF1B	MAB21L1									ATP11A	2.0444	5.03817	1.30122	7.76e-21	8.42e-20	LINC01522	2.15675	0.155255	-3.79615	7.44e-20	7.21e-19
		HAO1	RP11-167B3.3	LHX2	C5orf38		PRDM13	3.98007	-2.24195	1.78376e-11	4.10706e-11							DEGS2				ACTR3B	SCGB2A2									RASGEF1B	1.27988	3.03004	1.24332	6.1e-31	2.33e-29	MAB21L1	0.461435	0.217412	-1.08569	5.09e-14	2.67e-13
		RNU1-55P	OR5E1P	POPDC3	RAB11FIP1		LCE1A	5.51985	-2.97782	1.92536e-11	4.42522e-11							HIST1H4K				SLC29A4	AC091849.2									ACTR3B	1.78507	4.77722	1.42019	2.46e-16	1.65e-15	SCGB2A2	866.003	143.321	-2.59512	1.18e-19	1.12e-18
		RNASEH1P1	PGA5	INSL6	MS4A15		DCD	5.1682	6.38907	2.07747e-11	4.7652e-11							KCNJ10				SCEL	PSD3									SLC29A4	1.12077	2.50419	1.15985	7.69e-10	2.57e-09	AC091849.2	0.24945	0.079015	-1.65855	2.89e-14	1.55e-13
		HNRNPA3P15	HSPB3	RP5-1120P11.3	CES1P1		WNT7A	2.28741	-2.08465	2.33292e-11	5.34169e-11							IL17B				RASAL1	MKX									SCEL	0.258338	1.37751	2.41474	5.92e-20	5.8e-19	PSD3	5.75452	1.72713	-1.73632	1.39e-12	6.21e-12
		RP13-1056D16.2	RP11-481F24.3	CBSL	MEPE		DLX2	2.13999	1.75685	2.3557e-11	5.39248e-11							UNC13A				WFDC21P	GPR162									RASAL1	0.748898	3.26815	2.12563	6.7e-34	4.14e-32	MKX	3.03466	0.497826	-2.60782	1.29e-08	3.75e-08
		RTL1	MTDHP3	RP11-153F1.1	PRLHR		SPAG6	2.47419	2.67509	2.42021e-11	5.53665e-11							ATP1A3				ANGPT1	HS6ST3									WFDC21P	1.90395	6.94872	1.86775	2.32e-17	1.72e-16	GPR162	1.54352	0.541302	-1.51172	5.89e-09	1.78e-08
		LINC01014	RP11-26L20.4	CTD-2270F17.1	HPN		S100A7A	4.66142	3.29019	2.43413e-11	5.56499e-11							PLPPR1				TFCP2L1	SPATA6L									ANGPT1	0.487302	1.25903	1.36942	2.73e-05	5.42e-05	HS6ST3	1.97907	0.671802	-1.55872	2.74e-13	1.33e-12
		ADARB2-AS1	RP11-739N10.1	IL31RA	MIR4728		KRT81	2.41257	6.38319	2.46686e-11	5.6384e-11							HIST1H1C				LINC00518	GRB7									TFCP2L1	3.40977	12.274	1.84786	5.21e-15	3.02e-14	SPATA6L	0.386544	0.151381	-1.35245	3.84e-16	2.51e-15
		CACNA2D3-AS1	RP4-809F18.1	RP11-6O2.2	TNNT3		SSTR5	3.00438	-2.80694	2.80876e-11	6.40294e-11							OR10A3				CPAMD8	NRIP3									LINC00518	0.101197	0.877589	3.11638	2.45e-32	1.21e-30	GRB7	24.4163	8.75483	-1.47969	0.0106724	0.0148302
		CCND2P1	RP11-489D6.2	TLX3	TPH2		DCAF4L2	5.54212	-1.39886	2.83538e-11	6.46281e-11							PPP2R2C				YBX1P10	TMEM229B									CPAMD8	1.16078	2.6972	1.21637	2.68e-10	9.45e-10	NRIP3	8.41911	1.34478	-2.6463	2.78e-09	8.73e-09
		KRT6A	PAQR9	IL17C	LINC00564		CACNG5	2.49395	-4.19775	2.89304e-11	6.59093e-11							CPNE7				GABRP	LCA5L									YBX1P10	2.40935	5.64983	1.22957	1.89e-36	1.73e-34	TMEM229B	3.93678	1.64944	-1.25504	3.68e-23	5.17e-22
		CA10	LINC01883	CTD-2066L21.3	RP11-865I6.2		SPERT	2.45088	-2.11241	3.16485e-11	7.19392e-11							AMZ1				AGPAT4	TPPP3									GABRP	9.78332	166.602	4.08994	2.54e-31	1.04e-29	LCA5L	0.999679	0.498943	-1.00259	2.55e-25	4.58e-24
		LINC02109	P2RX6P	PAGE4	AKAP14		TAAR6	4.69559	-3.70019	3.26417e-11	7.41225e-11							SLC14A2				KCNS1	AP005212.2									AGPAT4	0.989738	2.02161	1.03039	1.09e-17	8.33e-17	TPPP3	8.82708	3.31174	-1.41435	5.22e-16	3.39e-15
		AP000439.5	RP11-10H3.1	C8orf31	DUX4L50		TEX15	3.36542	-0.932847	3.28974e-11	7.46566e-11							NPY2R				KLK5	UGT2B4									KCNS1	0.0994832	1.15062	3.53182	4.67e-27	1.06e-25	AP005212.2	0.313489	0.105169	-1.57571	3.52e-12	1.52e-11
		AMY2A	LINC02066	RP11-350J20.12	AC062028.1		PSG9	2.97376	-1.76081	3.3573e-11	7.61516e-11							WT1				IGKV1OR22-5	FAXDC2									KLK5	4.82448	66.7164	3.7896	2.09e-19	1.92e-18	UGT2B4	5.02871	0.0223105	-7.81632	2.22e-13	1.09e-12
		LY6L	GLYATL1P4	GAPDHP68	APOBEC4		GHSR	4.25703	-2.93911	3.43922e-11	7.79805e-11							FOXJ1				AL136162.1	AP000439.1									IGKV1OR22-5	0.348038	1.51157	2.11874	0.000612999	0.00101973	FAXDC2	4.18122	1.83598	-1.18737	5.43e-06	1.18e-05
		SEMG2	NOTO	SOHLH1	NELL1		VAX1	3.86304	-1.90647	3.44079e-11	7.80064e-11							CAPN9				SPATA13	ENTPD3									AL136162.1	0.466664	1.05444	1.17602	3.36e-14	1.79e-13	AP000439.1	0.434284	0.0374587	-3.53527	1.24e-28	3.48e-27
		PEX5L-AS2	CTD-2023N9.3	RGS6	CLDN5		KRTAP3-1	2.40842	-3.25393	3.87079e-11	8.74818e-11							HIST1H4J				MEX3A	RHOT1P1									SPATA13	0.105859	2.14614	4.34153	1.24e-59	4.87e-56	ENTPD3	2.21795	0.9074	-1.28941	1.32e-10	4.81e-10
		KRTAP9-4	PWRN1	RP11-449D8.5	RP5-1121E10.2		C11orf86	3.51514	-1.07518	3.89856e-11	8.80985e-11							TMEM249				LINC01842	TMEM26-AS1									MEX3A	6.65952	21.146	1.66689	1.96e-21	2.26e-20	RHOT1P1	0.583564	0.120917	-2.27087	5.66e-14	2.95e-13
		AQP12B	OR7E101P	CYP2W1	RP11-1415C14.3		REG1A	5.94196	-1.3786	3.92038e-11	8.85805e-11							IL9R				STEAP3	AL391421.1									LINC01842	0.41576	1.2902	1.63377	2.21e-17	1.64e-16	TMEM26-AS1	0.449	0.0783312	-2.51906	1.77e-17	1.33e-16
		GHRH	UGT2B28	RP11-408H20.3	SLC25A24P2		CHRNA4	2.95373	-1.49445	4.06968e-11	9.18967e-11							RDH16				SBSN	SEMA3B-AS1									STEAP3	10.8451	24.1831	1.15695	4.11e-24	6.46e-23	AL391421.1	2.84608	0.243373	-3.54774	6.34e-34	3.96e-32
		AC012354.6	SPRR2F	ESX1	MUC5AC		ZFR2	2.10605	-0.415481	4.30929e-11	9.71642e-11							MYBL1				LINC00987	CCDC158									SBSN	2.96846	7.77038	1.38827	5.57e-31	2.16e-29	SEMA3B-AS1	3.6491	0.862705	-2.0806	4.46e-30	1.5e-28
		RNU1-35P		MUC15	CHST8		GSTA3	2.73717	-0.843401	4.39027e-11	9.89145e-11							HPN				LINC00460	CELSR1									LINC00987	0.744424	1.90057	1.35224	5.17e-05	9.92e-05	CCDC158	0.374364	0.125112	-1.58122	3.51e-15	2.07e-14
		RP11-180C1.1		ST8SIA2	PSD3		LYPD4	2.65444	-2.64815	4.42584e-11	9.96418e-11							HIST1H2AL				DUOXA1	SEZ6									LINC00460	0.220427	0.883947	2.00366	2.97e-07	7.43e-07	CELSR1	22.5602	5.45063	-2.04928	1.19e-37	1.36e-35
		MIR5190		AIM2	MAB21L1		EBLN1	3.42812	-2.81426	4.97808e-11	1.11881e-10							OTX1				SLC9A6	POU4F3									DUOXA1	0.456958	1.80086	1.97855	2.21e-11	8.76e-11	SEZ6	0.401344	0.0368421	-3.44541	3.4e-07	8.43e-07
		RP1-166H4.2		DKK1	SULT2B1		CXorf67	3.56314	-1.48021	5.13638e-11	1.15338e-10							NAT1				RASD2	ADRA2C									SLC9A6	2.24318	4.59152	1.03342	1.83e-29	5.63e-28	POU4F3	0.238251	0.0305191	-2.9647	9.03e-05	0.000168116
		RNU1-108P		IGHV1-18	DEFB132		C1orf68	5.27621	-2.79019	5.63165e-11	1.26241e-10							TEX19				RCAN1	CABP4									RASD2	3.69183	17.4709	2.24255	3.42e-25	6.06e-24	ADRA2C	2.27204	0.927616	-1.29239	1.61e-09	5.19e-09
		RNU1-120P		FNDC1-IT1	SLC1A1		FAM71C	2.18928	-3.12645	5.80089e-11	1.29938e-10							MMP9				COLCA1	AK8									RCAN1	7.79122	17.1896	1.14161	2.68e-20	2.74e-19	CABP4	1.33552	0.361893	-1.88377	8.36e-17	5.86e-16
		AL050303.10		RP11-60A8.1	GCG		CT45A1	5.73089	-2.25726	5.98196e-11	1.33846e-10							COL22A1				ST8SIA1	AHNAK									COLCA1	0.259567	0.780847	1.58893	2.02e-06	4.59e-06	AK8	2.31155	0.677291	-1.77101	5.91e-40	1.08e-37
		AP003900.6		PCOLCE2	LDHD		NKX2-5	2.91633	0.05081	6.31774e-11	1.41046e-10							PRR15				MSN	RIPK3									ST8SIA1	0.343882	1.34489	1.96751	5.36e-34	3.4e-32	AHNAK	87.4937	40.3079	-1.11812	1.36e-26	2.88e-25
		RNU6-171P		CTC-529P8.1	RP11-403B2.7		ZIC3	3.09769	-2.42515	6.47801e-11	1.44517e-10							PLPPR5				MND1	KRT223P									MSN	49.3179	103.855	1.07438	2.19e-22	2.8e-21	RIPK3	3.05845	1.41549	-1.1115	5.08e-16	3.3e-15
		LINC00351		OTOP1	TMEM215		SPO11	4.08251	-3.83812	6.58037e-11	1.46693e-10							SLC27A6				UGT2B7	KCNJ11									MND1	2.46571	5.21634	1.08104	2.19e-19	2.01e-18	KRT223P	0.559914	0.0154683	-5.17782	1.16e-25	2.19e-24
		SCb-64M4.1		MIR4500HG	RIMS4		ALPI	3.92788	-3.60475	6.61205e-11	1.47345e-10							MEX3A				BIN1	NELL1									UGT2B7	0.167553	1.43695	3.10032	1.9e-28	5.21e-27	KCNJ11	6.76044	1.31348	-2.36372	8.94e-42	2.62e-39
		RP11-114G22.1		CADM3	AC141930.2		FCAMR	2.4081	-1.06322	6.78251e-11	1.50958e-10							SCUBE3				LYN	NPNT									BIN1	2.5465	5.62357	1.14297	5.72e-14	2.98e-13	NELL1	0.71512	0.151342	-2.24037	0.00161933	0.00253816
		RP11-153K16.1		CTD-2314B22.1	SERPINA5		BPIFA1	5.89769	1.78213	7.56242e-11	1.67966e-10							ARMC3				TCAM1P	C4A									LYN	4.74445	11.2319	1.24329	7.02e-25	1.2e-23	NPNT	39.5827	11.1306	-1.83034	9.38e-28	2.37e-26
		RP11-346D19.1		XAGE5	AC011899.10		C10orf113	2.50656	-2.84055	8.90333e-11	1.9717e-10							KCNG3				CALHM6	PTPRT									TCAM1P	0.142842	1.44071	3.33429	4.66e-29	1.38e-27	C4A	11.3466	2.73008	-2.05524	4.9e-24	7.61e-23
		RP11-352B15.2		PCDH8	GABRA1		HIST1H4F	3.65423	-3.51497	8.93379e-11	1.9782e-10							CAPSL				NCS1	EXOC2									CALHM6	4.80542	10.1983	1.08559	2e-09	6.39e-09	PTPRT	6.10317	0.468983	-3.70195	3.76e-28	9.91e-27
		KCNK16		LINC00392	DLX1		WFDC13	2.1257	-3.01519	1.00254e-10	2.21209e-10							HIST1H2BL				AL442663.4	AC005336.1									NCS1	4.694	10.4955	1.16089	1.23e-28	3.46e-27	EXOC2	18.1246	8.76967	-1.04736	2.75e-16	1.83e-15
		GABRR3		ELOVL3	RP5-1092A11.5		NKX2-3	3.16128	-2.42343	1.03326e-10	2.2785e-10							CADPS				MT1H	ARHGAP32									AL442663.4	1.05363	2.35133	1.1581	5.4e-13	2.53e-12	AC005336.1	0.592403	0.129979	-2.1883	1.53e-16	1.04e-15
		RP11-451F14.1		OR7C1	NOC2LP1		LCE1F	4.9018	-3.42404	1.07023e-10	2.35802e-10							CBLN2				CASC10	AC091182.1									MT1H	0.234981	1.24965	2.41091	2.58e-19	2.35e-18	ARHGAP32	9.38621	4.59692	-1.02988	2.47e-22	3.14e-21
		FLJ36000		COLCA1	CDH7		HTN1	5.79986	-1.05955	1.17667e-10	2.5875e-10							LHFPL5				COTL1	ADAMTS15									CASC10	0.505707	1.65986	1.71468	9.06e-15	5.11e-14	AC091182.1	1.04262	0.271877	-1.93919	1.46e-08	4.23e-08
		RP11-43D4.3		MT1H	RP11-166N6.2		DMRTC2	2.63951	-1.29729	1.21343e-10	2.66672e-10							SCGB1A1				FIGN	PCK1									COTL1	15.7282	40.7084	1.37198	3.06e-27	7.12e-26	ADAMTS15	15.5774	1.70587	-3.19087	4.89e-39	7.4e-37
		Six3os1_1		KIRREL2	KRT19P1		FGF3	3.27085	-3.30372	1.26893e-10	2.78431e-10							NT5DC4				IGLC3	BAALC									FIGN	0.32876	1.18133	1.84531	8.17e-16	5.17e-15	PCK1	0.380369	0.13582	-1.4857	1.94e-06	4.42e-06
		EFCAB3		LINC02100	GLRA3		PNMA6E	4.72463	-2.59301	1.30305e-10	2.85711e-10							GAL3ST2				MTFR2	DSCAM-AS1									IGLC3	207.41	482.781	1.21889	5.69e-07	1.38e-06	BAALC	1.35014	0.589954	-1.19443	0.0226808	0.0299432
		RN7SL183P		TPRXL	KCNJ3		CFC1	3.68614	-4.00216	1.42164e-10	3.11299e-10							FGD3				KLK8	MAST4									MTFR2	1.45544	3.47964	1.25748	1.06e-25	2.02e-24	DSCAM-AS1	11.2625	0.480749	-4.5501	1.01e-33	6.04e-32
		TPTE		SEPT14P12	RNY3		APOC3	5.11042	-1.10992	1.48655e-10	3.25357e-10							RET				RUNX3	CBLN1									KLK8	0.697082	6.05918	3.11972	9.94e-16	6.25e-15	MAST4	5.00438	1.63102	-1.61742	1.25e-33	7.28e-32
		AC144833.1		RP5-912I13.1	RP11-148B3.2		SLC5A12	2.27255	-0.825639	1.49132e-10	3.26322e-10							HOXC10				EDN3	RBM47									RUNX3	3.52765	10.034	1.50811	1.31e-19	1.23e-18	CBLN1	0.52023	0.164686	-1.65943	2.92e-07	7.31e-07
		RP11-408E5.4		HTR2A	LRRN4CL		ZIC5	3.03992	-0.660401	1.93282e-10	4.20293e-10							SPP1				AL512329.2	NXNL2									EDN3	0.698203	2.29745	1.71832	8.28e-05	0.000154734	RBM47	19.4417	9.31318	-1.06181	6.85e-33	3.61e-31
		RN7SL736P		EDN3	ADAM18		IRS4	3.79717	1.50738	2.20005e-10	4.76635e-10							EDN2				AC005674.2	AL139393.2									AL512329.2	1.01349	2.22283	1.13306	3.06e-09	9.58e-09	NXNL2	2.0111	0.216092	-3.21827	8.51e-37	8.5e-35
		RNU1-47P		PCP4	CTD-2033D15.2		SP8	3.77194	-3.41398	2.2631e-10	4.90117e-10							SLC44A4				OGDHL	RNA5SP111									AC005674.2	0.454514	0.930211	1.03323	4.85e-08	1.32e-07	AL139393.2	3.34975	1.60095	-1.06513	8.86e-18	6.85e-17
		RP11-1B20.1		NKX6-3	AC064875.2		KNCN	2.71159	-4.11803	2.38824e-10	5.16604e-10							RHBG				IGKJ5	CYP4F22									OGDHL	0.165726	0.493825	1.5752	4.56e-05	8.81e-05	RNA5SP111	0.552186	0.256501	-1.10619	2.58e-06	5.79e-06
		C14orf105		RP11-493L12.5	SCGB1D2		PNLIP	3.65964	-3.46264	2.50871e-10	5.42275e-10							RAMP1				ALG1L9P	GJA1									IGKJ5	4.02708	11.9942	1.57453	6.15e-08	1.66e-07	CYP4F22	4.98367	0.948095	-2.39411	1.18e-16	8.1e-16
		AC099552.4		SLC25A5P5	AP001136.2		TAS2R30	2.46653	-2.29018	2.63567e-10	5.69176e-10							AQP4				SLC2A14	TMC4									ALG1L9P	0.163498	0.423578	1.37336	1.31e-31	5.74e-30	GJA1	109.006	27.5794	-1.98275	1.84e-16	1.25e-15
		RNU1-84P		GPR158	TMEM178A		SLC15A1	2.24693	1.59715	2.73976e-10	5.91161e-10							HIST1H2AJ				ORM2	TSPAN13									SLC2A14	0.12842	0.667577	2.37806	6.23e-27	1.38e-25	TMC4	41.3044	17.1767	-1.26584	6.79e-27	1.49e-25
		RP11-115C10.1		ZDHHC4P1	DUX4L18		FAM9C	3.30477	-0.41257	2.74953e-10	5.93129e-10							SYT5				IGHV3OR16-8	FAM174A									ORM2	2.04028	13.0979	2.6825	1.58e-09	5.1e-09	TSPAN13	167.519	60.2943	-1.47423	3.41e-34	2.23e-32
		RN7SL308P		LINC00540	RP11-116O18.1		F13B	2.21267	-4.24521	2.77689e-10	5.98604e-10							ARNT2				QPCT	TACC1P1									IGHV3OR16-8	0.589882	1.42382	1.27127	0.00126664	0.0020139	FAM174A	18.5862	7.50057	-1.30916	9.21e-42	2.66e-39
		KCNIP4-IT1		COL6A5	IAPP		KLK12	3.15262	1.55021	3.03818e-10	6.53455e-10							CSAG1				TXK	CPED1									QPCT	4.48617	11.0884	1.3055	1.72e-07	4.42e-07	TACC1P1	0.268412	0.0277492	-3.27393	1.34e-27	3.31e-26
		AJ239322.1		RP11-291B21.2	RP11-382H24.2		C6orf118	2.47231	-2.5519	3.05965e-10	6.57994e-10							NLGN1				MLC1	CABCOCO1									TXK	0.200105	0.423663	1.08216	2.23e-05	4.47e-05	CPED1	1.74128	0.818907	-1.08838	2.45e-10	8.68e-10
		SSX3		CFHR1	LINC01953		AHSG	3.70882	-2.57048	3.0662e-10	6.59327e-10							CALB2				ARHGAP22	ATP6V1G2									MLC1	0.402555	2.36677	2.55567	0.00346578	0.00517972	CABCOCO1	0.817531	0.251356	-1.70154	1.99e-09	6.35e-09
		RN7SL493P		COL9A1	AVPR2		NEUROD4	5.30568	-2.09771	3.25256e-10	6.98324e-10							SPOCD1				RIPK4	GLRB									ARHGAP22	0.684868	1.54739	1.17594	7.67e-18	5.97e-17	ATP6V1G2	1.13255	0.533469	-1.08609	2.45e-15	1.48e-14
		RN7SL7P		NWD2	LRRN3		SLC17A8	2.40857	-2.5321	3.61363e-10	7.73923e-10							PCSK1				ST3GAL6-AS1	KDM4B									RIPK4	3.12784	6.48738	1.05247	3.93e-23	5.49e-22	GLRB	3.83667	1.5962	-1.26521	1.76e-10	6.32e-10
		RN7SL648P		KRT4	RNA5SP399		LIN28B	4.22719	-2.1842	3.68215e-10	7.87947e-10							SAMD11				SLPI	GALNT5									ST3GAL6-AS1	0.236051	0.823463	1.80261	4.83e-25	8.43e-24	KDM4B	12.2362	4.05222	-1.59437	9.94e-37	9.68e-35
		LCE5A		LINC01098	RNU6-316P		RAET1L	2.0431	-0.554383	3.72579e-10	7.97003e-10							ELAVL2				MMP7	MAN1A1									SLPI	64.434	626.465	3.28134	1.51e-26	3.16e-25	GALNT5	3.79876	0.748544	-2.34337	7.13e-19	6.19e-18
		RN7SL255P		RP11-87G24.3	CACNA1G		CCDC172	5.01279	-2.4349	3.90397e-10	8.33647e-10							BMPR1B				VPS9D1-AS1	PTGER3									MMP7	17.1196	161.147	3.23466	1.43e-24	2.36e-23	MAN1A1	22.2409	11.0785	-1.00545	1.07e-12	4.85e-12
		RP11-110H1.8		RP5-875O13.7	TEX14		C1orf158	2.40551	-2.30872	3.91759e-10	8.36455e-10							KCNK15				SPIB	RMND1									VPS9D1-AS1	2.75861	6.15611	1.15808	5.39e-08	1.46e-07	PTGER3	5.0626	0.909264	-2.47711	3.94e-29	1.17e-27
		FGB		AP001628.7	TPPP3		NR5A1	2.90142	-1.02835	3.99929e-10	8.53398e-10							UMODL1				TLX1	AL353593.2									SPIB	0.550138	4.92635	3.16265	1e-17	7.71e-17	RMND1	24.9556	8.53507	-1.54789	1.02e-22	1.35e-21
		LCE6A		KCNB1	CAPN11		TEX13B	2.63571	-4.05801	4.00697e-10	8.54836e-10							GBP5				ANGPTL4	AC003965.1									TLX1	0.273187	2.71142	3.31109	5.53e-19	4.87e-18	AL353593.2	0.458997	0.211388	-1.11859	1.15e-14	6.45e-14
		SCGB1D4		CNPY1	RP11-426L16.10		LCE2C	4.85875	-3.39548	4.04367e-10	8.62361e-10							PARD6B				SHC4	CCDC148									ANGPTL4	6.29349	15.3052	1.28209	6.71e-09	2.02e-08	AC003965.1	0.702425	0.240187	-1.54819	5.13e-22	6.3e-21
		OPCML-IT1		BCAR4	NBPF4		LCE2D	4.42613	-3.70364	4.14116e-10	8.8284e-10							MIEN1				KIAA1549L	RIIAD1									SHC4	0.606879	5.03738	3.05319	6.78e-25	1.16e-23	CCDC148	0.522	0.241646	-1.11116	2.94e-19	2.66e-18
		ZPBP2		RP11-366F6.2	MEG3		KRT24	2.88773	-0.310009	4.1968e-10	8.94598e-10							CGA				DDC	CFAP69									KIAA1549L	1.01241	2.67347	1.40092	5.38e-06	1.16e-05	RIIAD1	0.562063	0.166475	-1.75543	7.35e-27	1.61e-25
		RLBP1		SALL3	KLKP1		ECEL1	2.09925	3.25681	4.41091e-10	9.38584e-10							NELL2				OLFM4	UCP1									DDC	0.533433	1.79636	1.7517	9.01e-25	1.53e-23	CFAP69	0.990286	0.296882	-1.73795	1.46e-30	5.24e-29
		APOH		ARL14	RP11-265N7.2		KRT31	2.30056	0.0552552	4.43341e-10	9.43197e-10							TPPP2				DCLK2	GPD1									OLFM4	11.232	29.0456	1.3707	2.35e-07	5.95e-07	UCP1	0.922594	0.0385191	-4.58205	7.64e-07	1.82e-06
		RN7SL177P		UCMA	GC		MAGEB16	4.31296	-3.30762	4.43362e-10	9.43197e-10							SPDYC				A2ML1	CST9									DCLK2	1.30791	2.77767	1.08661	7.16e-12	2.99e-11	GPD1	5.11324	2.14688	-1.252	0.00011859	0.000217064
		RP11-759F5.1		C2orf70	FRMPD2		CNMD	3.21985	0.0843616	4.6235e-10	9.82324e-10							C11orf87				PLAGL1	MIR5685									A2ML1	1.07447	7.33815	2.77179	3.4e-38	4.23e-36	CST9	12.1736	0.0856569	-7.15097	5.64e-33	3.01e-31
		NOVA1-AS1		SCHLAP1	ZBTB16		FEZF1	2.50005	-2.9958	4.69469e-10	9.96992e-10							FBXL16				AC055822.1	AC007637.1									PLAGL1	1.26077	3.12152	1.30794	6.95e-16	4.44e-15	MIR5685	1.95705	0.679937	-1.52521	1.09e-14	6.11e-14
		RN7SL366P		RP5-1056H1.2	TEKT5		NEUROD2	2.40336	-0.938434	4.79408e-10	1.01785e-09							CYP1A2				WNT6	CDHR3									AC055822.1	1.02213	2.29568	1.16734	1.46e-23	2.15e-22	AC007637.1	0.541169	0.171799	-1.65536	6.8e-15	3.89e-14
		MUC21		LINC01297	C7orf57		C7orf77	2.36328	-3.67682	5.24465e-10	1.11165e-09							HIST1H1E				TNFSF13B	AC068888.1									WNT6	0.49199	4.92425	3.3232	4.33e-26	8.69e-25	CDHR3	1.04014	0.342597	-1.60219	0.000299964	0.000520794
		RP11-386B13.4		IGHD3-10	TNNT1		PLG	2.8556	-2.70065	5.24507e-10	1.11165e-09							SLC7A11				POU5F1B	KCNH1									TNFSF13B	4.05083	10.1514	1.32539	2.48e-06	5.59e-06	AC068888.1	3.91501	1.50051	-1.38357	8.06e-26	1.55e-24
		GS1-165B14.2		KNOP1P5	RP1-159A19.4		RTP3	3.66966	-1.87215	5.44969e-10	1.15287e-09							ADAMDEC1				AC019171.1	ASCL1									POU5F1B	0.181287	0.986403	2.4439	0.0288432	0.0375099	KCNH1	0.477438	0.0445648	-3.42134	1.46e-35	1.15e-33
		HELT		EFTUD1P1	SLC5A7		ZG16	2.36923	-2.37504	5.87673e-10	1.2406e-09							IL19				L1CAM	AC093297.2									AC019171.1	0.192788	1.51919	2.97821	1.14e-16	7.89e-16	ASCL1	3.19197	0.15325	-4.38049	1.27e-06	2.95e-06
		LINC01716		RP11-77A13.1	RP11-754N21.1		CLEC2A	2.98273	-4.03504	6.16032e-10	1.29866e-09							VGF				EEF1DP5	CA12									L1CAM	0.951677	3.30339	1.7954	5.85e-13	2.73e-12	AC093297.2	17.9752	3.19539	-2.49195	3.55e-30	1.23e-28
		DPPA2		IGHM	FAXDC2		FGF21	3.50608	-3.04349	6.26043e-10	1.31915e-09							NMU				MET	CACNA1F									EEF1DP5	0.499232	1.83547	1.87837	1.78e-39	2.95e-37	CA12	79.9253	5.83963	-3.7747	3.01e-49	5.92e-46
		SPANXC		RNASE7	KCNC1		SORCS3	2.17892	-1.14541	6.62512e-10	1.39392e-09							MOGAT1				CARD9	SYTL2									MET	2.95755	7.70602	1.38158	7.71e-16	4.9e-15	CACNA1F	0.330757	0.105314	-1.65107	9.24e-14	4.71e-13
		SPACA7		CALCB	RP11-299G20.2		TPH2	2.31398	-3.11877	6.87572e-10	1.44561e-09							CEACAM6				FOXQ1	PIFO									CARD9	0.738116	1.57497	1.09341	1.9e-19	1.76e-18	SYTL2	12.4504	2.51144	-2.30961	4.34e-36	3.71e-34
		RP11-402P6.9		RP11-180M15.3	LMOD2		SERPINB4	4.28257	0.650143	7.30195e-10	1.53327e-09							TLX1				RASGRF1	SPAG6									FOXQ1	0.543468	1.94959	1.84291	0.0011234	0.00180157	PIFO	2.70363	1.28933	-1.06828	3.25e-11	1.26e-10
		LINC00355		AC144835.1	SAMD11		APOA5	2.2081	-3.25656	7.66849e-10	1.60689e-09							HIST1H1B				PLAG1	MIR29B2CHG									RASGRF1	0.357959	1.04207	1.54158	5.05e-15	2.93e-14	SPAG6	2.01971	0.113356	-4.15522	0.0011318	0.00181447
		RN7SL296P		STAC2	CTD-2154H6.1		KPRP	4.56688	-2.34266	7.8979e-10	1.65478e-09							CLDN9				GZMB	FHL5									PLAG1	0.209881	0.465556	1.14939	7.95e-05	0.000148903	MIR29B2CHG	1.03937	0.19477	-2.41586	8.71e-32	3.9e-30
		RPL35AP31		ECEL1	RP11-102N12.2		CPA6	2.05115	1.79688	8.00738e-10	1.67694e-09							CLGN				AC243960.1	CCDC173									GZMB	2.15441	7.90218	1.87496	6.18e-19	5.39e-18	FHL5	0.904583	0.441206	-1.0358	2.6e-10	9.17e-10
		C1orf141		NLRP3P1	RMRP		GNAT3	4.97876	-0.155698	8.12332e-10	1.70083e-09							CHST6				CAVIN4	TMC3-AS1									AC243960.1	0.527619	1.06995	1.01998	0.000122381	0.000223546	CCDC173	0.524309	0.175105	-1.58219	4.61e-27	1.04e-25
		RP11-115H15.2		CTD-2023N9.3	KRT18P68		CLVS2	3.38293	1.029	8.33292e-10	1.74371e-09							DMP1				CDT1	AC020917.4									CAVIN4	0.165856	0.43731	1.39872	2.62e-25	4.7e-24	TMC3-AS1	0.502369	0.246847	-1.02513	3.81e-19	3.4e-18
		CHRNB3		PPP1R1A	KRT18P13		GCG	5.21386	-2.10008	8.66347e-10	1.811e-09							TINCR				TNFRSF13B	TMC5									CDT1	4.65148	10.4004	1.16088	7.94e-23	1.07e-21	AC020917.4	1.25187	0.471842	-1.40772	3.06e-26	6.22e-25
		RP11-712P20.2		DMRT1	COX17P1		VRTN	3.37729	-1.93489	8.98923e-10	1.87737e-09							MUC2				SH3PXD2A-AS1	AC092162.3									TNFRSF13B	0.168542	0.401626	1.25275	0.00225679	0.00346688	TMC5	12.0888	3.93359	-1.61976	2.14e-22	2.75e-21
		LINC02118		XIRP1	RCVRN		PRSS41	3.6063	-1.92654	9.20592e-10	1.92218e-09							TMEM190				AL356417.2	KIF5C									SH3PXD2A-AS1	0.135943	0.736985	2.43863	4.72e-21	5.22e-20	AC092162.3	0.261995	0.034407	-2.92877	3.54e-35	2.63e-33
		RP11-482M8.3		RPL6P7	CCDC175		KRTAP17-1	2.33118	-3.72713	9.35206e-10	1.95202e-09							AMH				TICRR	GLI3									AL356417.2	0.678952	2.62179	1.94917	8.74e-10	2.91e-09	KIF5C	3.79886	0.75477	-2.33146	1.17e-26	2.48e-25
		OR52E6		KDM4E	LINC01124		NEUROG3	2.48154	-2.20071	1.00497e-09	2.09451e-09							GABRQ				TRBJ2-3	KCNH1-IT1									TICRR	1.02627	2.46124	1.26198	4.61e-27	1.04e-25	GLI3	8.68493	2.73648	-1.66619	4.25e-33	2.3e-31
		RNU2-59P		STRA8	RP11-719K4.3		WDR72	2.17565	2.50376	1.00573e-09	2.09584e-09							CFAP47				AC027228.2	AC009716.1									TRBJ2-3	0.873306	1.83989	1.07506	0.00030523	0.000529422	KCNH1-IT1	0.534986	0.0351799	-3.92668	1.03e-29	3.32e-28
		CTD-2043I16.1		IL21-AS1	APOA2		EDDM3B	2.41278	-1.33027	1.08129e-09	2.2484e-09							LY6H				LINC01348	CCNO									AC027228.2	0.294415	0.685466	1.21924	4.83e-17	3.46e-16	AC009716.1	0.351453	0.129407	-1.44141	2.86e-13	1.38e-12
		RP11-829H16.5		RP4-555L14.4	ELOVL2		GSTA2	2.27003	-1.25698	1.09348e-09	2.27298e-09							TAS1R3				OR7E38P	AC021483.2									LINC01348	0.232819	0.555182	1.25375	1.94e-08	5.5e-08	CCNO	9.04662	2.54027	-1.8324	1.16e-11	4.72e-11
		PDHA1P1		RP11-3J1.1	BTNL9		OLIG2	2.50174	-3.48035	1.11564e-09	2.3185e-09							IL17REL				TPRXL	AC010522.1									OR7E38P	3.53894	10.178	1.52406	1.15e-26	2.44e-25	AC021483.2	0.257319	0.125055	-1.041	5.89e-24	9.05e-23
		RP11-277P12.10		AC002056.5	CTD-3118D11.3		CFHR4	3.22002	-3.37766	1.13284e-09	2.3529e-09							APLP1				CEBPB	LINC01116									TPRXL	0.329008	0.838457	1.34962	9.96e-14	5.06e-13	AC010522.1	0.450689	0.189179	-1.25238	1.25e-12	5.63e-12
		RN7SL173P		TTC24	RP11-426D19.1		OR56A3	3.72169	-2.93327	1.20942e-09	2.50937e-09							KCNH1				GNRH1	KLHDC9									CEBPB	25.0212	59.5896	1.25191	3.64e-33	2e-31	LINC01116	8.44401	1.83042	-2.20575	5.57e-39	8.12e-37
		RP1-293L8.2		RP11-362F19.1	SNORA7B		MAB21L2	2.25665	-1.60618	1.22941e-09	2.54969e-09							CA9				PLEKHG1	AC098679.2									GNRH1	0.64744	1.40609	1.11887	5.02e-13	2.36e-12	KLHDC9	7.94309	2.69146	-1.56131	4.37e-29	1.3e-27
		E2F3-IT1		RP11-499O7.7	HOXB5		PRR35	2.02843	-3.93034	1.29647e-09	2.68447e-09							TMEM215				LSP1P2	ZDHHC11B									PLEKHG1	2.47881	6.62479	1.41823	5.51e-24	8.5e-23	AC098679.2	0.297224	0.0652243	-2.18807	1.55e-25	2.89e-24
		RP11-474L11.5		C11orf53	RP3-395M20.12		C8A	4.34771	-2.88087	1.43381e-09	2.9594e-09							SLC4A1				STOX2	CST2									LSP1P2	0.583128	1.18686	1.02527	6.51e-06	1.4e-05	ZDHHC11B	0.727898	0.330031	-1.14114	2.31e-08	6.52e-08
		PRB2		RP11-5P18.10	RGS7		SCRT2	3.4362	-3.5576	1.53006e-09	3.1509e-09							NSG2				GPRIN2	TPRG1-AS2									STOX2	0.333435	1.16569	1.80571	4.01e-27	9.16e-26	CST2	6.6804	1.00263	-2.73615	8.86e-21	9.57e-20
		OR7E39P		NPTX2	LRRC31		DEFB126	3.58299	-3.61712	1.73892e-09	3.57169e-09							CCDC187				PTTG1	CXCR1									GPRIN2	0.912445	4.62743	2.3424	6.15e-26	1.21e-24	TPRG1-AS2	0.316933	0.0307636	-3.36488	8.34e-21	9.04e-20
		PROKR2		FTHL17	SPANXC		WFDC6	2.29248	-0.914863	1.8027e-09	3.69892e-09							AADAC				AC008622.2	LRRC31									PTTG1	10.9321	21.8932	1.00191	3.06e-22	3.85e-21	CXCR1	0.320555	0.108067	-1.56865	2.11e-05	4.25e-05
		RNU1-94P		MAGEA9B	INS		CT83	4.72324	0.436192	2.01212e-09	4.11698e-09							CHRNA9				IGLV5-37	DCLK1									AC008622.2	0.207623	0.427509	1.04199	5.44e-15	3.15e-14	LRRC31	2.45956	0.460722	-2.41643	1.21e-18	1.02e-17
		AC106873.4		CASP14	TUBA4B		S100A7	3.13358	5.95466	2.1754e-09	4.44555e-09							HIST1H3C				AC011442.1	CYP2A7									IGLV5-37	1.21635	3.00368	1.30418	0.0093018	0.013052	DCLK1	3.57521	1.0427	-1.7777	6.81e-17	4.82e-16
		HRG		METTL21C	RN7SL826P		TBX20	2.3432	-1.52997	2.32824e-09	4.75255e-09							GDA				PGBD5	AC010735.2									AC011442.1	0.311331	0.948663	1.60745	2.11e-15	1.28e-14	CYP2A7	11.6162	0.274281	-5.40434	9.94e-17	6.92e-16
		CPN1		EQTN	CCDC172		FGG	3.7825	4.07084	2.38007e-09	4.85616e-09							PF4				OLFM2	PTPN13									PGBD5	0.497126	2.94345	2.56582	2.42e-20	2.49e-19	AC010735.2	2.65794	0.788237	-1.75361	5.32e-20	5.23e-19
		LINC00488		LINC01925	DUSP15		TAGLN3	2.31061	-1.41726	2.63028e-09	5.35284e-09							ADGRB2				RFLNA	AL512785.2									OLFM2	7.57445	18.8866	1.31815	2.06e-16	1.39e-15	PTPN13	6.55769	3.26812	-1.00473	1.86e-14	1.02e-13
		RP11-9H20.2		FAM133A	VAV3-AS1		CCDC175	2.02766	-2.80754	2.66706e-09	5.42587e-09							HS3ST4				CENPA	AC120498.4									RFLNA	1.51742	4.12331	1.44219	2.12e-14	1.15e-13	AL512785.2	0.248762	0.0994793	-1.3223	9.95e-08	2.62e-07
		RN7SL105P		KRT86	KRT18P3		GC	5.10677	-1.36321	2.69036e-09	5.47143e-09							C19orf33				CLDN8	MAPT-IT1									CENPA	2.98206	9.60274	1.68714	1.58e-34	1.07e-32	AC120498.4	7.12339	0.732559	-3.28155	2.09e-39	3.43e-37
		MIR4714		AC010091.1	COMMD3-BMI1		WFDC10A	2.69238	-3.93089	2.75231e-09	5.59428e-09							IGFALS				IRX4	MED15P4									CLDN8	4.42441	14.1795	1.68024	1.39e-05	2.86e-05	MAPT-IT1	0.425937	0.0165901	-4.68224	1.31e-33	7.61e-32
		RN7SL126P		SPRR2E	TIMP4		APOBEC1	2.56384	-4.13073	2.79078e-09	5.66821e-09							CD177				PDE9A	MKRN2OS									IRX4	1.05502	2.19725	1.05843	0.0367908	0.0470933	MED15P4	1.9905	0.0404328	-5.62146	4.8e-18	3.8e-17
		BARHL2		OR1F1	RP5-1063M23.2		PCSK2	2.94016	1.51022	2.79086e-09	5.66821e-09							FGFR3				PINX1	LDLRAD4									PDE9A	1.22579	5.43066	2.14741	1.02e-24	1.71e-23	MKRN2OS	1.22111	0.590752	-1.04757	1.92e-18	1.58e-17
		RP11-319G9.1		IGHV3-30	FGF16		HS3ST6	2.21773	-1.1621	2.92869e-09	5.94016e-09							2018-03-10				NKX2-5	LUZP2									PINX1	0.00411689	1.58543	8.5891	2.27e-75	1.49e-71	LDLRAD4	6.575	2.88994	-1.18595	2.56e-22	3.26e-21
		RP11-25C19.3		RPL18P13	RP11-54O7.3		ZNF280A	2.56924	-3.01803	3.16898e-09	6.4132e-09							ENTPD8				CPNE8-AS1	RPS15AP36									NKX2-5	0.237364	1.6382	2.78694	7.76e-16	4.93e-15	LUZP2	0.226003	0.0695332	-1.70057	1.72e-14	9.45e-14
		CACNA1C-IT3		ERVWE2	CTNND2		BRINP3	3.09265	3.43799	3.21346e-09	6.50104e-09							RCOR2				AC006946.2	HID1									CPNE8-AS1	0.260874	0.902848	1.79113	4.57e-18	3.63e-17	RPS15AP36	0.795173	0.351931	-1.17598	2.92e-11	1.14e-10
		CTD-2350J17.1		GAPDHS	ITPKA		ZNF716	3.08642	-2.41581	3.28971e-09	6.65085e-09							HIST1H1T				FABP5P7	LRRC6									AC006946.2	0.355313	1.12149	1.65826	4.56e-22	5.63e-21	HID1	32.2633	11.0493	-1.54594	1.06e-33	6.3e-32
		CYP2A7P1		RP5-963E22.4	RIT2		PAX7	3.07754	1.62926	3.49076e-09	7.04556e-09							MS4A15				TRBV6-1	SOCS2-AS1									FABP5P7	0.286959	0.848122	1.56343	2.88e-20	2.92e-19	LRRC6	4.55125	1.66136	-1.4539	7.68e-19	6.64e-18
		RP11-338L22.2		MAGEA4	RP11-444D3.1		MOG	2.64442	-1.20983	4.11645e-09	8.28263e-09							CELF3				SIRPA	SIDT1-AS1									TRBV6-1	0.540692	1.1131	1.04171	1.94e-06	4.42e-06	SOCS2-AS1	1.0274	0.471104	-1.12488	4.89e-07	1.19e-06
		SPANXD		RP11-109A6.2	RP11-320H14.1		OLIG1	2.15742	-1.07187	4.16077e-09	8.36902e-09							HOXB9				MOB3B	PHGR1									SIRPA	9.96434	20.7255	1.05656	5.71e-25	9.89e-24	SIDT1-AS1	0.276998	0.0657513	-2.07479	2.09e-20	2.17e-19
		ADAM7		RP11-157G21.2	RP11-626H12.1		MAGEB2	3.62665	-1.4169	4.25666e-09	8.55716e-09							HHIPL2				MT1L	GDPD3									MOB3B	1.39892	3.63657	1.37826	2.22e-23	3.21e-22	PHGR1	2.64155	0.0717936	-5.20139	2.67e-23	3.83e-22
		CACNA1C-AS4		LINC01693	LINC00052		LHX5	2.35901	-3.04958	4.39627e-09	8.83293e-09							INSM1				RSU1	KCNJ12									MT1L	3.00186	8.20921	1.45139	2.14e-08	6.07e-08	GDPD3	5.39421	1.88682	-1.51546	0.000932998	0.00151166
		GLYATL3		OR7E108P	SDPR		XAGE2	4.31955	-0.190094	4.5613e-09	9.1564e-09							MNX1				LINCR-0001	SERPINA9									RSU1	19.2959	42.7892	1.14895	4.23e-31	1.67e-29	KCNJ12	0.414768	0.185685	-1.15944	5.57e-05	0.000106373
		LCE1C		AC010967.2	PLPPR3		HMX3	2.71913	-2.66669	4.59048e-09	9.21191e-09							BRSK2				PRSS33	LRRN4CL									LINCR-0001	0.221234	0.694282	1.64995	0.000184049	0.000328532	SERPINA9	0.49219	0.150784	-1.70673	4.4e-18	3.5e-17
		RP6-24A23.8		CHRDL2	RP11-121E16.1		FGL1	2.51086	1.40249	4.6897e-09	9.40477e-09							HIST1H3G				AC104117.3	TTC23L									PRSS33	0.569289	3.80388	2.74024	1.08e-36	1.04e-34	LRRN4CL	0.954651	0.475776	-1.00469	1.86e-11	7.42e-11
		RP11-396O20.1		SPX	PROZ		SYT4	4.23972	1.05431	5.26143e-09	1.05258e-08							CCDC151				IGLV3-16	METRN									AC104117.3	0.299571	1.04533	1.80298	6.9e-18	5.38e-17	TTC23L	0.361527	0.121192	-1.57681	8.06e-26	1.55e-24
		RN7SKP189		RP4-613A2.1	CTD-2263F21.1		GPR6	2.78922	-2.64335	5.28639e-09	1.05745e-08							CHRND				PTCHD1	FAM83E									IGLV3-16	0.97718	3.16825	1.69699	0.000304483	0.000528174	METRN	17.761	7.67814	-1.20988	2.15e-18	1.76e-17
		RN7SL692P		CCL7	XXbac-BPG248L24.13		LCE2A	3.57554	-4.12878	5.31755e-09	1.06345e-08							FAM196A				ETV4	LINC00271									PTCHD1	0.126002	1.27146	3.33496	3.15e-26	6.39e-25	FAM83E	6.21841	1.69377	-1.87631	1.42e-13	7.06e-13
		RN7SL471P		HSPA8P3	HAL		OCSTAMP	2.10504	-3.16433	5.35757e-09	1.07134e-08							EMX1				U62317.1	RNU6-137P									ETV4	3.29793	7.06667	1.09947	3.27e-09	1.02e-08	LINC00271	0.241944	0.118874	-1.02525	5.3e-15	3.07e-14
		MARK2P5		TERT	RN7SL260P		SLC6A19	2.19407	-4.1723	5.62443e-09	1.12346e-08							TERT				NPR3	PIEZO2									U62317.1	2.34038	9.39177	2.00465	1.23e-23	1.82e-22	RNU6-137P	2.07587	1.00905	-1.04072	2.64e-19	2.4e-18
		SPRR1B		RP11-62I21.1	RP11-126O22.1		C9	2.54283	-2.02154	6.41053e-09	1.27515e-08							CST6				PRR27	MSX2									NPR3	1.1157	3.92142	1.81342	0.000250079	0.00043891	PIEZO2	2.30451	0.694259	-1.73091	3.52e-13	1.69e-12
		CTB-152G17.5		GALR1	FGL1		AMELX	3.94543	-3.42989	7.35814e-09	1.45869e-08							TMEM151A				IGHV3-42	NDP									PRR27	0.0213131	3.16004	7.21206	2.01e-15	1.22e-14	MSX2	7.13542	2.78607	-1.35677	3.21e-26	6.49e-25
		ARL4AP1		LINC01926	ACSM2A		UGT2A1	3.84949	-3.12497	7.56669e-09	1.49791e-08							HIST1H1D				CRLF1	AL513304.1									IGHV3-42	0.181546	0.364176	1.0043	0.00225355	0.00346243	NDP	6.79175	0.907811	-2.90332	0.00466769	0.00683833
		RP11-39M21.1		TAS2R2P	MIR10B		SLC18A3	3.68145	-3.57481	7.75212e-09	1.53378e-08							PNCK				CALML5	APOA1									CRLF1	1.71073	9.09074	2.40979	0.00010885	0.00020028	AL513304.1	1.28887	0.219428	-2.55429	3.95e-06	8.68e-06
		NKX6-3		LINC00605	LINC00160		SLITRK1	2.73142	0.214136	7.78695e-09	1.54034e-08							CLPSL1				SLC7A5P1	GPRC5A									CALML5	83.2809	281.791	1.75857	7.12e-15	4.06e-14	APOA1	0.355578	0.124304	-1.5163	0.0113239	0.0156802
		CLUHP4		AC067959.1	XXbac-BPG248L24.10		KLK14	2.07411	3.2508	8.23684e-09	1.62702e-08							HIST1H2BG				RRAGD	RAB26									SLC7A5P1	0.158898	0.548585	1.78761	6.47e-21	7.07e-20	GPRC5A	48.6119	21.4545	-1.18003	2.82e-19	2.56e-18
		RP11-397C12.1		HOXA11-AS	RP11-644A7.2		ANKRD66	2.22556	-3.34364	8.333e-09	1.64584e-08							MSLNL				TTC22	PYDC1									RRAGD	2.45189	7.17477	1.54904	1.17e-22	1.55e-21	RAB26	5.10852	1.73405	-1.55876	4.23e-27	9.63e-26
		RNU1-63P		RP11-1109M24.5	KRT8P3		FSTL5	2.69853	-1.8081	8.66167e-09	1.70983e-08							SIM2				RBM38	C1orf189									TTC22	1.51692	4.08051	1.42761	2.48e-26	5.07e-25	PYDC1	8.90346	2.07192	-2.1034	0.000423806	0.000720668
		RNU1-78P		HOXD13	CTA-392E5.1		CTSE	2.28443	-0.246079	9.16792e-09	1.8067e-08							SCX				IGKV1D-39	LGALS8-AS1									RBM38	11.7175	27.9231	1.25279	9.86e-33	5.12e-31	C1orf189	0.840221	0.399799	-1.07149	1.44e-13	7.19e-13
		RP11-319F12.2		HAPLN1	RP4-753M9.1		KRTAP9-4	3.72944	-4.03411	9.16833e-09	1.8067e-08							IGF2BP1				AC109322.1	ALOXE3									IGKV1D-39	1.25074	3.44857	1.46321	4.21e-05	8.17e-05	LGALS8-AS1	0.54534	0.168829	-1.69159	1.41e-28	3.92e-27
		PANX3		MIR4432HG	IGFBP1		CAMKV	2.09741	-1.28169	9.55331e-09	1.88134e-08							NKX6-1				SPAAR	TTC39A									AC109322.1	1.48782	3.26556	1.13413	8.73e-19	7.49e-18	ALOXE3	0.361791	0.174885	-1.04875	6.25e-07	1.5e-06
		RP11-318G21.4		SLC12A1	RN7SKP261		RTL1	3.13349	-1.57732	1.04777e-08	2.0578e-08							GNG3				DGAT2	AL353803.5									SPAAR	0.588531	2.37025	2.00985	5.04e-13	2.37e-12	TTC39A	16.7507	5.27071	-1.66815	8.14e-31	3.03e-29
		RNU1-17P		P3H2-AS1	TMEM244		KRT38	2.56297	-3.47609	1.05397e-08	2.06952e-08							AOC1				DNER	GNA14									DGAT2	3.3313	11.0405	1.72865	1.83e-23	2.67e-22	AL353803.5	0.833269	0.166153	-2.32627	4.31e-25	7.6e-24
		ADAM5		ZBED2	TMC5		HAO1	3.34868	-2.11916	1.06976e-08	2.09962e-08							SGCZ				MCM10	SLC24A2									DNER	0.448308	1.7534	1.96759	1.5e-22	1.95e-21	GNA14	2.81706	1.09876	-1.35832	1.29e-16	8.89e-16
		XXbac-BPG27H4.8		RP11-471M2.3	SNORD15B		NPY	3.40935	-0.778718	1.07727e-08	2.11413e-08							DLX4				CLDN23	LMX1B									MCM10	2.24272	5.9166	1.39952	4.54e-25	7.97e-24	SLC24A2	0.65122	0.180277	-1.85293	1.51e-21	1.77e-20
		AE000658.25		AF277315.13	PLPPR5		SOX3	2.57113	-2.68338	1.0847e-08	2.12849e-08							HIST3H2A				KRT5	ERO1B									CLDN23	2.65148	7.23213	1.44762	1.03e-17	7.92e-17	LMX1B	14.5119	3.45155	-2.07192	7.06e-41	1.67e-38
		RP1-53O8.2		RP11-344P13.6	RP1-272L16.1		AMER2	2.70288	-0.992055	1.11296e-08	2.183e-08							LKAAEAR1				PDZK1IP1	MREG									KRT5	36.2179	167.494	2.20933	3.31e-13	1.59e-12	ERO1B	4.42234	2.10362	-1.07194	2.21e-12	9.69e-12
		MAGEB6		HOXB9	GATA4		SEMG2	3.90936	-2.87207	1.12994e-08	2.21557e-08							TF				SLC36A4	CCND1									PDZK1IP1	18.8376	51.767	1.45841	8.16e-15	4.63e-14	MREG	17.8794	8.43168	-1.08441	8.71e-32	3.9e-30
		SLC6A10P		MAGEB6	PTH2		LY6L	4.04254	-3.08316	1.23381e-08	2.41221e-08							KCNE4				BCL2A1	ETNK2									SLC36A4	1.04997	2.16351	1.04302	6.67e-24	1.02e-22	CCND1	147.739	37.9055	-1.96257	9.79e-28	2.46e-26
		CTD-2021H9.3		RAP2CP1	RP11-680C21.1		CCDC198	2.37541	-3.35995	1.24082e-08	2.4254e-08							HIST1H4C				AL583785.1	MAP3K1									BCL2A1	2.89927	17.5018	2.59374	7.78e-18	6.05e-17	ETNK2	14.3026	6.90094	-1.05141	8.73e-19	7.49e-18
		ISX		RP11-114F10.3	LINC00305		MYT1L	2.12214	-1.87852	1.28955e-08	2.5182e-08							FUT7				LINC01679	AL135818.2									AL583785.1	0.861843	3.88196	2.17129	2.73e-13	1.33e-12	MAP3K1	15.6454	7.13737	-1.13227	9.94e-23	1.32e-21
		PRDM14		SERPINB10	RP11-115F18.1		AQP12B	2.99568	-4.20402	1.30792e-08	2.55353e-08							HIST1H3F				BIRC3	SLC25A21-AS1									LINC01679	0.306162	0.793378	1.37372	6.81e-21	7.42e-20	AL135818.2	0.953116	0.239398	-1.99324	8.51e-28	2.15e-26
		SETP10		MLC1	CA4		OR4B1	3.70171	-4.13577	1.39588e-08	2.72087e-08							PRAC2				GBP1	EPB41L4A									BIRC3	4.12813	8.58451	1.05625	1.63e-08	4.67e-08	SLC25A21-AS1	1.12873	0.544489	-1.05173	9.55e-22	1.14e-20
		HMGB1P23		PSAPL1	RNU5E-1		KRTAP21-2	2.58626	-4.23512	1.49721e-08	2.91306e-08							SLC16A6				ART3	SNORA60									GBP1	12.7295	36.6327	1.52496	3.48e-17	2.54e-16	EPB41L4A	1.94172	0.835524	-1.21658	3.41e-18	2.73e-17
		PRB4		RP11-624C23.1	RNU5B-4P		TGIF2LX	3.19464	-4.1435	1.52116e-08	2.95903e-08							CASP14				FAM19A3	RNU6-1165P									ART3	0.426436	14.1944	5.05685	3.81e-39	5.9e-37	SNORA60	2.7468	1.16047	-1.24304	0.00218658	0.00336611
		RP13-379L11.1		RPL31P44	RP11-531H8.2		KCNQ2	2.1379	-0.813886	1.60815e-08	3.12256e-08							BBOX1				NCAM1	AC008669.1									FAM19A3	0.290669	4.54452	3.96668	7.4e-28	1.89e-26	RNU6-1165P	0.359931	0.168609	-1.09404	8.38e-08	2.23e-07
		RP11-399K21.12		PLA2G2F	RP11-114M1.3		RHCG	2.03666	2.39312	1.67482e-08	3.2475e-08							HIST1H2BM				LMO1	LINC00886									NCAM1	0.316201	0.649444	1.03836	0.00103927	0.00167363	AC008669.1	0.996198	0.429365	-1.21423	3.53e-24	5.59e-23
		KIR3DL3		ZNF723P	AGAP1-IT1		AMY2A	2.78617	-2.28924	1.76101e-08	3.4099e-08							SIX2				PRKD3	CYP2T3P									LMO1	0.176988	0.722242	2.02883	1.02e-11	4.21e-11	LINC00886	1.06036	0.491693	-1.10873	8.71e-12	3.6e-11
		MAGEA9B		GLIS3-AS1	FABP1		CNTN5	2.10437	-0.559006	1.81223e-08	3.5057e-08							LCN1				CDH19	ABLIM3									PRKD3	3.49195	7.46894	1.09687	3.82e-25	6.75e-24	CYP2T3P	0.78228	0.0453957	-4.10706	1.25e-09	4.08e-09
		RN7SL445P		SMYD1	WARS2-IT1		KRTAP4-1	3.25252	-3.64416	1.82633e-08	3.53148e-08							MMP3				AL512598.1	AGL									CDH19	0.142246	2.26452	3.99275	8.71e-12	3.6e-11	ABLIM3	5.79019	1.78597	-1.69691	3.33e-29	9.96e-28
		RP6-24A23.6		CALCA	KIF3AP1		KCNK16	2.96498	-3.06024	1.90195e-08	3.67457e-08							KRT37				ADD2	NR2E3									AL512598.1	0.466729	1.2981	1.47574	3.82e-15	2.25e-14	AGL	11.1706	4.8413	-1.20624	2.9e-13	1.4e-12
		TYRL		RP11-442J21.2	NBPF6		SMR3B	4.89674	5.71165	2.1853e-08	4.20632e-08							GDF15				IGHV1-67	SYCE3									ADD2	0.34578	1.35324	1.96849	4.16e-12	1.77e-11	NR2E3	0.307651	0.070061	-2.13461	4.37e-24	6.84e-23
		SNRPGP18		LINC01833	AC010761.14		FDCSP	2.62892	7.46601	2.28278e-08	4.38838e-08							SAA4				LAMC2	AC012485.2									IGHV1-67	0.966464	1.97151	1.02851	0.000963004	0.00155758	SYCE3	2.40369	1.15378	-1.05889	1.42e-08	4.1e-08
		RN7SL685P		SHISA8	KRT8P37		BPIFB2	2.08399	4.46362	2.36494e-08	4.54103e-08							KISS1				LHFPL5	SERP2									LAMC2	8.24907	21.493	1.38157	3.44e-11	1.33e-10	AC012485.2	0.234097	0.103368	-1.17932	7.83e-10	2.62e-09
		DCAF8L1		MRPL23-AS1	RP11-552I14.1		GABRR3	2.26254	-3.61182	2.37246e-08	4.55451e-08							TSPAN1				CENPW	ZNF467									LHFPL5	0.217692	0.473719	1.12174	3.73e-08	1.03e-07	SERP2	1.59256	0.645843	-1.30209	2.35e-18	1.92e-17
		ZBTB20-AS5		MIR137HG	RP11-616M22.2		CA10	2.93976	-0.702319	2.44801e-08	4.69606e-08							FSIP1				FUT3	CMYA5									CENPW	9.60967	41.161	2.09872	4.42e-37	4.6e-35	ZNF467	10.0861	3.76625	-1.42117	4.45e-32	2.12e-30
		RP11-220C2.1		AC226118.1	PRR25		PRB1	3.36788	-3.81764	2.5404e-08	4.86919e-08							CFAP99				PART1	MINDY1									FUT3	1.46753	4.39232	1.58159	2.8e-21	3.18e-20	CMYA5	2.89322	0.868301	-1.73641	4.87e-30	1.64e-28
		RP11-149B9.2		FOXE3	RP11-299G20.5		KRT6A	2.37363	5.39799	2.63284e-08	5.04158e-08							KCNA4				CLDN6	TPSAB1									PART1	0.356131	1.08943	1.61309	5.35e-22	6.56e-21	MINDY1	19.5685	8.87471	-1.14076	9.83e-27	2.11e-25
		ESX1		RP11-109E24.1	RN7SL494P		BPIFB3	4.35884	-2.86761	2.75129e-08	5.26285e-08							KCNK9				ELOVL4	AC007220.1									CLDN6	0.168894	9.49234	5.81257	5.9e-21	6.47e-20	TPSAB1	10.8561	3.04576	-1.83363	4.16e-21	4.62e-20
		SERPINB11		RP11-459D22.1	KLF2P1		GHRH	2.3003	-0.714943	2.77956e-08	5.3158e-08							F7				ANKRD1	SYNPR-AS1									ELOVL4	0.806373	2.40549	1.57681	2.1e-08	5.94e-08	AC007220.1	0.268546	0.127529	-1.07434	1.29e-07	3.36e-07
		RP4-753D4.2		CCDC166	COL10A1		MAGEA9	3.5004	-4.01313	2.78629e-08	5.32812e-08							TYRP1				AC105094.1	FAM151B									ANKRD1	0.211429	2.39855	3.50392	9.4e-11	3.48e-10	SYNPR-AS1	0.760687	0.102328	-2.89411	1.17e-29	3.74e-28
		LINC00404		C14orf105	PLA2G2C		EFCAB3	2.46258	-3.14667	3.00056e-08	5.73e-08							PVALB				CCKBR	TMEM190									AC105094.1	0.143056	1.37272	3.26238	1.85e-21	2.14e-20	FAM151B	0.767288	0.34762	-1.14226	5.85e-36	4.88e-34
		RP11-552M6.1		LINC00113	RP11-775G23.1		CST9	2.5714	3.86235	3.03879e-08	5.79996e-08							EPO				NCOA7	CYP4F23P									CCKBR	0.0998724	2.79375	4.80597	1.22e-19	1.15e-18	TMEM190	0.524071	0.207913	-1.33378	0.00363253	0.00541043
		CHP2		RP11-737O24.1	IGFN1		TPTE	3.20582	-3.91268	3.17536e-08	6.05109e-08							CYP21A2				FCRL3	CASQ1									NCOA7	5.41627	14.0916	1.37946	4.44e-26	8.85e-25	CYP4F23P	5.06578	1.533	-1.72443	1.02e-24	1.72e-23
		RNU6-681P		PSORS1C2	RP1-56K13.5		LCE3D	3.82551	-3.64127	3.24328e-08	6.17597e-08							OPRD1				PRSS41	SYT13									FCRL3	0.35959	0.881312	1.2933	2.96e-06	6.59e-06	CASQ1	0.908931	0.29725	-1.6125	5.71e-12	2.4e-11
		RP11-190D6.1		RP1-101D8.1	RPL13AP17		PHGR1	2.01452	1.15475	3.42435e-08	6.5085e-08							FCRLB				AC005586.2	AC124067.2									PRSS41	0.189036	0.751583	1.99127	9.56e-13	4.36e-12	SYT13	14.7221	2.10303	-2.80744	2.98e-07	7.47e-07
		OTOP3		IGHV4-31	RP11-678D18.1		PSAPL1	3.82425	-1.01437	3.53869e-08	6.71808e-08							KCNJ3				AC108673.2	AC023421.1									AC005586.2	0.304166	0.674172	1.14826	1.04e-06	2.44e-06	AC124067.2	3.03994	0.864175	-1.81465	4.5e-14	2.37e-13
		SLC17A4		Six3os1_5	RN7SL554P		C3orf30	2.33416	-4.14081	3.64723e-08	6.9169e-08							ZBED2				IGHV3-22	PTHLH									AC108673.2	0.677811	1.78535	1.39725	5.83e-18	4.58e-17	AC023421.1	0.542023	0.066225	-3.03291	3.1e-09	9.67e-09
		MTND2P2		CTD-2083E4.7	LINC00671		ELSPBP1	2.91738	-4.12292	3.70142e-08	7.01674e-08							DIO1				EN1	RLN2									IGHV3-22	0.216988	0.670177	1.62693	0.00832835	0.0117912	PTHLH	6.57856	3.21188	-1.03435	8.25e-06	1.75e-05
		AC152010.1		RP11-1134I14.2	RN7SL546P		DEFB4A	3.59009	-3.98309	3.85492e-08	7.30239e-08							CACNG4				CAHM	CTNND2									EN1	1.53569	27.0373	4.13799	1.64e-29	5.09e-28	RLN2	2.30367	0.454396	-2.34192	4.19e-11	1.61e-10
		SLC6A5		EN2	RP11-9G1.3		SSX3	3.945	-3.29274	4.27056e-08	8.07289e-08							ORM1				TSPAN33	GLIPR1L2									CAHM	0.249406	0.536982	1.10638	2.98e-23	4.24e-22	CTNND2	2.91315	1.05215	-1.46924	1.72e-13	8.53e-13
		TBC1D21		FGF21	LCN6		SCGB1D4	3.52809	-3.2589	4.30407e-08	8.13453e-08							FABP6				IGHV2-26	LRRC37A5P									TSPAN33	6.4886	17.6572	1.44428	4.4e-31	1.73e-29	GLIPR1L2	0.601756	0.216265	-1.47638	1.72e-20	1.8e-19
		RP11-301N24.3		SH3GL2	RP3-333B15.5		LCE6A	4.04426	-3.68548	4.43122e-08	8.36702e-08							LAG3				OLAH	COL1A2									IGHV2-26	18.2129	40.5937	1.15629	0.000390676	0.000667679	LRRC37A5P	0.223951	0.102995	-1.12061	1.27e-15	7.9e-15
		LIPF		IGHV3-73	GLDN		LCE1D	3.70124	-3.98616	4.80606e-08	9.05782e-08							MMP10				GJB5	ZBTB18									OLAH	0.193581	1.29008	2.73644	8.47e-36	6.88e-34	COL1A2	502.792	251.14	-1.00147	8.89e-13	4.07e-12
		CGB5		AK3P5	SNORA71D		OR52E8	2.2798	-4.00277	5.10368e-08	9.60279e-08							RUFY4				LRP8	MEIS3									GJB5	1.21315	4.53817	1.90336	2.9e-10	1.02e-09	ZBTB18	25.6404	11.6991	-1.13202	0.0120832	0.0166472
		RP11-748C4.1		FUT3	AC013439.4		OR52E6	2.59131	-4.05484	5.33433e-08	1.00243e-07							ADAMTS20				AC067931.1	AL157931.1									LRP8	1.09517	2.84447	1.37701	6.21e-27	1.38e-25	MEIS3	5.7231	2.11388	-1.4369	6.08e-30	2.02e-28
		EEF1B2P8		PROK2	HSD17B13		APOH	3.97718	-1.85119	5.8209e-08	1.09059e-07							HOXB13				IL27RA	SREBF1									AC067931.1	0.21799	0.700122	1.68335	5.75e-13	2.69e-12	AL157931.1	0.343602	0.143741	-1.25727	0.00289134	0.00437101
		CTD-2015H3.1		RPRML	HNRNPA1P57		CRNN	3.97457	-2.01614	5.85588e-08	1.09692e-07							IFNL2				ELF5	KIAA1257									IL27RA	6.53982	16.7811	1.35951	1.37e-14	7.62e-14	SREBF1	49.4808	24.4807	-1.01523	1.96e-18	1.61e-17
		AC006000.5		IVL	NRAP		LRTM1	2.34358	-3.85642	6.60419e-08	1.23328e-07							FGF5				PLEKHG6	AC073508.1									ELF5	3.54317	33.9386	3.25981	1.32e-32	6.73e-31	KIAA1257	0.448966	0.174877	-1.36026	2.31e-20	2.38e-19
		HAND1		AC017002.2	VSTM2A		SPANXC	3.51332	-3.07704	6.79918e-08	1.2689e-07							SPHKAP				VGLL1	LRRC15									PLEKHG6	3.23196	6.72165	1.05641	6.89e-14	3.56e-13	AC073508.1	0.692266	0.0347082	-4.31798	3.11e-15	1.85e-14
		NAA11		CTD-2207P18.1	RNU1-3		DPPA2	3.47413	-3.73911	6.99801e-08	1.30521e-07							TIGIT				IGKV1D-33	RPS6P12									VGLL1	1.67821	36.3293	4.43614	1.38e-44	7.77e-42	LRRC15	27.7306	13.1565	-1.0757	8.3e-11	3.09e-10
		LINC01111		IGKV1D-39	DLG3-AS1		DDX53	3.16087	-3.35533	7.22882e-08	1.34577e-07							RGS8				CDCA2	KIF12									IGKV1D-33	0.306338	1.07237	1.80761	0.000378666	0.000648167	RPS6P12	0.275615	0.0473446	-2.54139	5.95e-11	2.25e-10
		LINC02050		ALPP	RPL7P39		KCNJ18	2.73387	-3.67568	7.3091e-08	1.36043e-07							TNR				ARHGEF26-AS1	PHF21B									CDCA2	1.85813	6.68289	1.84662	1.82e-32	9.11e-31	KIF12	18.1582	2.73903	-2.72888	1.11e-29	3.55e-28
		RP11-614F17.2		OR7E161P	AC152010.1		SPACA7	2.70065	-4.25763	7.50786e-08	1.39643e-07							IFNL3				AC141557.1	OMD									ARHGEF26-AS1	0.304124	0.835918	1.4587	1.52e-12	6.81e-12	PHF21B	0.324758	0.0202187	-4.0056	3.61e-17	2.63e-16
		SLC25A51P3		PGC	HPYR1		LCE5A	3.01229	-3.69767	7.63174e-08	1.4183e-07							GJA3				IGHJ2	ARSG									AC141557.1	1.04378	2.72751	1.38577	5.97e-18	4.69e-17	OMD	6.06296	1.82257	-1.73405	3.89e-20	3.89e-19
		SCHLAP1		PAX3	STAR		FGF23	3.37897	-3.35672	7.85938e-08	1.45956e-07							EPHA8				IGHV3OR16-13	LRRN3									IGHJ2	6.40353	18.8632	1.55863	3.56e-05	6.98e-05	ARSG	4.72164	1.20787	-1.96683	2.93e-42	9.31e-40
		RP11-52J3.3		NKX2-5	AC132008.1		PRB2	2.33318	-3.3911	8.27892e-08	1.53434e-07							MIOX				AC011479.1	U73166.1									IGHV3OR16-13	0.70682	2.53214	1.84094	0.000729543	0.00120101	LRRN3	0.611078	0.295054	-1.05038	3.02e-09	9.43e-09
		RN7SKP48		FOXD3	RN7SL692P		RLBP1	2.23224	-1.37572	8.73963e-08	1.61692e-07							SLC30A8				KCNQ4	RHBDL3									AC011479.1	0.931395	2.67411	1.5216	8.39e-09	2.49e-08	U73166.1	0.704033	0.290085	-1.27917	1.13e-19	1.07e-18
		NTS		NPHS1	XIRP2		FGB	3.25421	4.33929	9.97484e-08	1.83888e-07							RIMS4				KRT83	AC135050.5									KCNQ4	0.414897	2.85862	2.7845	2.26e-31	9.41e-30	RHBDL3	0.594552	0.196282	-1.59887	1.15e-10	4.21e-10
		CTC-527H23.1		PNPLA5	MYF6		C2orf78	2.98513	-3.80462	1.03169e-07	1.90002e-07							BPIFB1				GLS	AL133230.1									KRT83	0.24555	2.5098	3.35349	2.16e-32	1.07e-30	AC135050.5	1.37667	0.645408	-1.0929	2.1e-17	1.56e-16
		RP1-65P5.5		TRIML2	RP11-234O6.2		AC091980.2	2.45949	-4.27568	1.06874e-07	1.96605e-07							CST5				AC090907.2	PDCL3P4									GLS	6.17874	13.018	1.07512	1.01e-22	1.34e-21	AL133230.1	0.220976	0.110089	-1.00521	5.91e-09	1.79e-08
		KRT77		GLB1L3	ELANE		HELT	2.61032	-4.18175	1.07266e-07	1.97286e-07							CALHM1				MMP12	ZMYND10									AC090907.2	0.16556	0.49652	1.5845	1.42e-06	3.28e-06	PDCL3P4	2.01348	0.934736	-1.10706	2.08e-17	1.55e-16
		RP11-680E19.1		CTC-465D4.1	RN7SL253P		ZPBP2	2.32881	-2.92409	1.07891e-07	1.98416e-07							ADGRF4				P2RX5	SIGLEC15									MMP12	2.14066	9.95484	2.21734	6.17e-21	6.74e-20	ZMYND10	4.6098	0.69867	-2.72202	8.5e-41	1.94e-38
		MT1B		KLHL30-AS1	AC007163.6		KRT78	2.45354	-1.85305	1.18467e-07	2.17162e-07							AADACL3				YBX1P1	AC100826.1									P2RX5	0.30385	0.844516	1.47477	6.29e-15	3.61e-14	SIGLEC15	2.34041	0.996282	-1.23214	2.3e-18	1.88e-17
		RP11-182I10.1		FAM131C	CFB		ZNF560	2.19621	-1.70909	1.24997e-07	2.28808e-07							KIF1A				KLK6	RN7SL838P									YBX1P1	0.5067	1.28806	1.34599	5.34e-32	2.49e-30	AC100826.1	1.7174	0.282963	-2.60154	1.94e-29	5.95e-28
		DCAF12L1		DNAH11	NKX3-1		DMBT1	2.10953	2.63731	1.25294e-07	2.29329e-07							CLDN25				PSAT1	AL021068.1									KLK6	2.84028	41.2781	3.86127	9.24e-31	3.42e-29	RN7SL838P	0.404027	0.0787227	-2.3596	0.00149292	0.00234975
		CH507-513H4.3		IGHV3-21	MIR342		CHRNB3	2.15677	-4.16362	1.34578e-07	2.45876e-07							HIST1H2AG				GALNT13	CADM2									PSAT1	3.76824	24.9381	2.72639	3.81e-44	1.97e-41	AL021068.1	2.1899	0.861662	-1.34567	4.22e-15	2.47e-14
		RN7SL393P		PRDM14	LINC01168		C1orf141	2.47468	-4.04683	1.35541e-07	2.4756e-07							PMCH				XIRP1	DISP3									GALNT13	0.271544	1.58443	2.5447	1.69e-09	5.42e-09	CADM2	0.340856	0.0821976	-2.05199	2.3e-14	1.25e-13
		F9		RP4-681L3.2	NPY1R		MUC21	2.52533	-0.910264	1.51579e-07	2.75937e-07							KCNJ6				PLB1	EVA1B									XIRP1	0.262914	0.679029	1.36888	2.18e-09	6.93e-09	DISP3	0.332251	0.138744	-1.25985	2.75e-08	7.72e-08
		RP11-143E21.1		LINC01675	SLC18A1		ALPPL2	2.14121	-4.23139	1.73795e-07	3.15305e-07							CEACAM5				AL844908.1	RAI2									PLB1	0.356516	1.28514	1.84988	2.05e-10	7.29e-10	EVA1B	24.3369	8.80474	-1.46679	2.99e-15	1.78e-14
		RP11-413B19.2		KCNJ6	MAS1L		CPN1	3.04186	-3.89663	1.78431e-07	3.23391e-07							CDH2				FIRRE	ASPN									AL844908.1	0.74239	2.52698	1.76717	8.44e-21	9.12e-20	RAI2	11.9705	3.20669	-1.90033	1.6e-22	2.07e-21
		RP11-182I10.2		PCSK1N	KRT8P9		PRB4	2.56955	-3.89841	1.86017e-07	3.36804e-07							PRAME				GS1-594A7.3	CYP4Z1									FIRRE	0.300138	1.3859	2.20713	1.71e-14	9.4e-14	ASPN	56.1979	17.8049	-1.65824	4.88e-17	3.5e-16
		CTA-992D9.6		RP11-3B12.5	GAGE2A		BARHL2	2.5484	-3.76187	1.88856e-07	3.41774e-07							MAEL				AC245100.3	AC130650.2									GS1-594A7.3	0.190015	1.10611	2.54131	6.44e-29	1.86e-27	CYP4Z1	56.5201	5.61022	-3.33263	1e-18	8.55e-18
		GOLGA6L11P		LINC01908	KRT18P18		HRG	2.32175	-3.69507	2.49301e-07	4.48214e-07							APOA1				MIR3142HG	AL365181.2									AC245100.3	0.343283	1.20076	1.80647	0.000159002	0.000286056	AC130650.2	0.585682	0.274897	-1.09122	2.6e-15	1.56e-14
		RN7SL297P		KCNJ18	CTA-972D3.2		PSG11	3.69462	-2.94499	2.62786e-07	4.71991e-07							PLEKHD1				AIF1L	SYT1									MIR3142HG	0.370817	1.39928	1.9159	1.94e-20	2.02e-19	AL365181.2	1.47754	0.327095	-2.17542	1.04e-14	5.82e-14
		CTD-2383I20.1		RPRM	AC000124.1		HTR2C	2.55468	-2.26063	2.67499e-07	4.80217e-07							C2orf54				VLDLR	RN7SL704P									AIF1L	9.57236	26.441	1.46583	4.72e-27	1.06e-25	SYT1	7.87811	0.406504	-4.27651	2.98e-24	4.75e-23
		CTAG2		OGDHL	CFAP65		FLG2	2.59782	-1.31806	2.67962e-07	4.81002e-07							DLX5				ANP32E	TNFRSF14-AS1									VLDLR	1.99217	4.18997	1.0726	6.03e-18	4.73e-17	RN7SL704P	0.248829	0.105206	-1.24193	7.15e-05	0.000134714
		ZNF679		SACS-AS1	CCL16		C6orf15	2.06519	2.10695	2.80631e-07	5.02848e-07							AKR7A3				PCBP3	AC008663.1									ANP32E	18.1675	50.7065	1.48081	2.92e-27	6.82e-26	TNFRSF14-AS1	0.635802	0.299392	-1.08654	3.56e-14	1.89e-13
		UGT1A10		FAM230C	RP11-138H10.2		MAGEB10	2.8401	-4.25895	2.93225e-07	5.24638e-07							PIGR				SIT1	MAP3K12									PCBP3	0.247317	0.749511	1.59959	6.47e-14	3.35e-13	AC008663.1	11.2413	0.687407	-4.0315	5.42e-35	3.91e-33
		NEK2		IL21	RP11-127O4.3		C1orf94	2.70234	-2.16352	3.03243e-07	5.42029e-07							AC004233.2				STAP1	MIEN1									SIT1	1.91493	3.84404	1.00533	1.77e-06	4.04e-06	MAP3K12	2.19012	0.929759	-1.23608	7.95e-32	3.6e-30
		PKMYT1		UGT1A10	LRRC3C		PROKR2	2.64949	-2.84012	3.15425e-07	5.63469e-07							HOXC12				AATBC	EXOC6									STAP1	0.686932	1.43719	1.06502	0.000241605	0.00042472	MIEN1	50.7096	18.681	-1.44068	2.5e-06	5.63e-06
		KIF4A		FRGCA	IPO8P1		KRT6C	2.27061	1.54911	3.20696e-07	5.72547e-07							KLHDC7B				AC023043.1	LRRC17									AATBC	0.456902	1.02163	1.16091	3.74e-18	2.99e-17	EXOC6	6.1465	2.80175	-1.13344	6.68e-36	5.54e-34
		HSD17B6		GS1-594A7.3	HTR1E		UCMA	2.45971	-4.2429	3.30863e-07	5.90293e-07							CLPS				CDC25A	BMPR1B									AC023043.1	1.82675	4.16627	1.18948	1.05e-16	7.31e-16	LRRC17	6.90461	1.60089	-2.10868	6.85e-31	2.6e-29
		SPC25		PROKR2	SNORA23		FAM9A	2.60946	-4.16941	3.36571e-07	5.99946e-07							SLC6A4				IGKV1OR2-108	LYPD6									CDC25A	1.77185	4.40782	1.3148	3.98e-30	1.35e-28	BMPR1B	37.9208	1.29488	-4.8721	1.01e-15	6.34e-15
		CDC25C		CWH43	LINC00210		SPANXD	2.97465	-4.19214	3.61806e-07	6.43916e-07							LIX1				ITGA6	AC068137.1									IGKV1OR2-108	3.21041	7.38467	1.20178	9.59e-05	0.000177714	LYPD6	4.51143	0.939083	-2.26426	1.98e-25	3.61e-24
		UHRF1		ATP11A-AS1	C11orf97		TMEM229A	2.68656	-3.31835	3.70098e-07	6.58222e-07							TMEFF2				FAM129C	STARD10									ITGA6	16.7098	41.7219	1.32011	2.27e-08	6.4e-08	AC068137.1	0.274709	0.0817071	-1.74937	3.25e-16	2.15e-15
		NUSAP1		NPBWR1	RP11-471N19.1		CST11	2.08772	-3.54963	3.72402e-07	6.6206e-07							MRGPRX3				CD79B	NTN4									FAM129C	0.211858	0.593512	1.48618	0.00140197	0.0022144	STARD10	68.6809	16.888	-2.02391	2.36e-37	2.56e-35
		TPX2		KRT6C	2019-12-01		FGA	3.96013	3.53617	3.82696e-07	6.79827e-07							JPH3				IDO1	RNU4-82P									CD79B	2.58441	7.21057	1.48028	2.15e-15	1.3e-14	NTN4	36.2757	9.91526	-1.87128	9.41e-20	9e-19
		NUF2		CTD-2527I21.5	HSPB7		ADAM7	3.1109	-3.61649	4.03143e-07	7.14962e-07							CABP7				L3MBTL4	AC141930.1									IDO1	2.7396	19.0037	2.79424	2.85e-18	2.3e-17	RNU4-82P	0.315668	0.143561	-1.13675	4.15e-05	8.07e-05
		HJURP		CSAG2	RP11-648L3.2		GLYATL3	3.79542	-0.881076	4.19886e-07	7.43711e-07							SOX11				KCNN4	CEACAM6									L3MBTL4	0.401043	1.65466	2.04471	2.48e-29	7.54e-28	AC141930.1	2.29907	0.606864	-1.92161	1.86e-28	5.11e-27
		CDK1		RN7SL393P	RP11-94I2.4		SERPINB3	3.63116	0.63076	4.58627e-07	8.10162e-07							LHCGR				TINCR	TAL2									KCNN4	5.87883	30.4441	2.37256	3.04e-37	3.25e-35	CEACAM6	75.5068	17.8422	-2.08131	5.73e-19	5.04e-18
		CCNB1		RP11-266N13.2	CTD-2043I16.1		2020-03-11	2.11739	-0.926941	5.18926e-07	9.14049e-07							PYDC1				SLCO4A1-AS1	MORN5									TINCR	4.29592	9.29289	1.11316	1.27e-05	2.62e-05	TAL2	0.268869	0.101861	-1.4003	6.77e-05	0.000128065
		DTL		AC018641.7	LINC01111		RALYL	2.50724	-1.17815	5.42815e-07	9.55016e-07							ONECUT2				CARD17	SNORA11									SLCO4A1-AS1	0.174027	1.09868	2.65839	1.14e-27	2.86e-26	MORN5	0.245334	0.102163	-1.26387	0.00101659	0.0016386
		TROAP		RP11-96B2.1	KRT8P35		OTX2	2.6701	-3.87245	5.73861e-07	1.00837e-06							CLDN6				SMOC1	LINC02343									CARD17	0.243987	0.739179	1.59912	6.05e-12	2.54e-11	SNORA11	19.0666	1.22066	-3.96531	1.25e-20	1.33e-19
		CKS2		MKRN3-AS1	KISS1R		PRDM14	2.28703	-4.08329	5.79782e-07	1.01838e-06							MYOD1				YBX3	NEGR1									SMOC1	1.29646	6.79218	2.38929	1.56e-26	3.27e-25	LINC02343	1.17021	0.223668	-2.38733	3.62e-28	9.56e-27
		SPC24		RP1-127D3.4	RNU1-14P		LINC02203	2.84364	-4.26255	5.89915e-07	1.03507e-06							GAD1				NES	CYB561D2									YBX3	11.6186	27.6175	1.24915	2.89e-31	1.18e-29	NEGR1	1.26155	0.399955	-1.65729	6.7e-20	6.53e-19
		C16orf59		PAX1	WFDC10A		SMR3A	4.34304	-0.769393	6.13095e-07	1.07471e-06							HIST1H3I				FAT2	SPATA41									NES	11.8935	31.6279	1.41102	2.46e-09	7.77e-09	CYB561D2	14.4957	5.04813	-1.5218	1.43e-45	9.35e-43
		HMMR		TRBV7-7	ZBBX		SPRR4	3.02042	-4.18973	6.26977e-07	1.0983e-06							TRH				AC008760.2	RPH3AL									FAT2	0.668809	1.56935	1.2305	6.8e-11	2.56e-10	SPATA41	0.546795	0.234259	-1.2229	2.86e-17	2.1e-16
		INHBA		ZNF679	CLRN1		SPRR1B	3.18553	0.889566	6.68005e-07	1.16747e-06							C1orf194				AC022144.1	LINC00940									AC008760.2	0.709419	2.19491	1.62945	1.22e-08	3.57e-08	RPH3AL	2.14588	0.822494	-1.38349	7.84e-27	1.71e-25
		KIF20A		AC128709.2	RP3-340B19.3		LCE1C	2.76207	-1.88032	7.06845e-07	1.23392e-06							VSTM2L				AC005682.1	RAB6C									AC022144.1	0.610695	1.24283	1.0251	1.74e-07	4.48e-07	LINC00940	0.727584	0.144173	-2.33531	4.02e-35	2.95e-33
		CEP55		CXCR2P1	HSPD1P15		PRODH2	2.61266	-3.65127	7.53033e-07	1.31278e-06							BCAS1				IGLV3-19	AL137798.1									AC005682.1	0.315589	0.854074	1.43632	5.95e-14	3.09e-13	RAB6C	0.916772	0.0866404	-3.40345	2.09e-41	5.48e-39
		BUB1		RP11-43D4.2	RNY4		VCX2	2.31005	-4.2041	1.00637e-06	1.74172e-06							FRMPD3				PNMA3	FLRT3									IGLV3-19	132.085	294.888	1.15869	6.02e-06	1.29e-05	AL137798.1	0.229172	0.0999308	-1.19743	0.000249889	0.000438616
		CDKN3		NPSR1	DCDC2		KRTAP3-3	2.91589	-1.79811	1.00715e-06	1.7429e-06							INHA				TLR6	AC124067.4									PNMA3	0.174588	1.1787	2.75516	1.02e-27	2.56e-26	FLRT3	2.25717	0.629177	-1.84298	5.13e-16	3.33e-15
		COL11A1		CT45A10	RP11-356O9.1		HCRTR2	2.11647	-2.10582	1.04667e-06	1.80991e-06							NXPH4				IGHD2-2	SARDH									TLR6	0.985782	2.02116	1.03584	5.06e-13	2.38e-12	AC124067.4	0.919939	0.0631718	-3.86419	7.05e-46	5.16e-43
		BICDL1		KRT6A	SNORA38B		PANX3	2.00311	-3.78532	1.11213e-06	1.91963e-06							FSD1				ELOVL3	NXPH1									IGHD2-2	0.866925	1.93396	1.15758	1.34e-08	3.89e-08	SARDH	1.61167	0.799331	-1.01169	1.1e-08	3.23e-08
		BUB1B		AC012363.13	MIR3178		C11orf97	2.09329	-3.97813	1.19249e-06	2.05423e-06							SPINK4				RYR1	AC084262.1									ELOVL3	0.488972	1.10114	1.17118	0.00767055	0.0109253	NXPH1	3.16214	0.117814	-4.74632	1.5e-18	1.25e-17
		PYCR1		RP11-662I13.2	PDK4		ISX	2.95776	-1.24217	1.30174e-06	2.23544e-06							SUSD3				CLDN1	ZNF516									RYR1	0.330007	1.16405	1.81858	1.03e-16	7.15e-16	AC084262.1	0.257915	0.124461	-1.05119	4.38e-08	1.2e-07
		TRIM59		OR7E39P	RN7SL838P		KIR3DL3	2.16546	-4.26438	1.31355e-06	2.25508e-06							MAST1				AC015712.4	AL031709.1									CLDN1	6.4192	19.4703	1.60081	1.41e-09	4.56e-09	ZNF516	4.23384	1.86273	-1.18455	2.68e-20	2.74e-19
		DLGAP5		IGFL2-AS1	ACTN3		SERPINA6	2.29617	5.51909	1.46479e-06	2.50832e-06							FOXD3				ZBTB32	DOK7									AC015712.4	0.140024	0.853644	2.60796	3.64e-24	5.76e-23	AL031709.1	0.643447	0.321651	-1.00032	1.6e-12	7.13e-12
		LMNB1		AC060834.2	2019-03-11		MAGEA9B	3.54879	-2.60987	1.62648e-06	2.77682e-06							SLCO1A2				IGHGP	GPD1L									ZBTB32	0.275794	0.603762	1.13039	4.15e-10	1.43e-09	DOK7	2.63236	0.676315	-1.96059	8.18e-21	8.86e-20
		KIF11		RP5-1028L10.2	KRTAP9-4		PRM1	3.43229	-3.95922	1.65853e-06	2.82967e-06							FOXD1				NHSL1	APOF									IGHGP	23.5182	62.4845	1.40972	2.78e-06	6.2e-06	GPD1L	20.2599	8.90238	-1.18637	1.8e-28	4.97e-27
		KIF23		RP3-413H6.2	GNAT3		MAGEB6	2.22384	-4.24998	1.67757e-06	2.86136e-06							OSTN				PPARA	CHST15									NHSL1	1.85035	3.82831	1.04891	5.58e-27	1.24e-25	APOF	0.508683	0.052392	-3.27935	2.88e-27	6.75e-26
		PAQR4		DEFB4A	KRT8P7		AL035425.2	3.48317	-2.71098	1.76955e-06	3.01343e-06							IL20				LINC01152	GATA2									PPARA	1.05102	2.33269	1.15021	1.31e-27	3.24e-26	CHST15	13.3806	6.03808	-1.14798	1.38e-30	4.97e-29
		RRM2		ELAVL3	LA16c-349E11.1		RBMXL2	2.26381	-3.39953	1.85035e-06	3.14718e-06							MINDY4B				PLEKHF1	LINC01605									LINC01152	0.3251	1.39645	2.10281	1.08e-15	6.73e-15	GATA2	4.65781	1.69851	-1.45538	1.21e-18	1.02e-17
		KIF2C		UMODL1-AS1	DQX1		SERPINB11	3.29779	-3.13489	2.3689e-06	4.00031e-06							CRYBA2				C6orf223	TMEM9B-AS1									PLEKHF1	3.24706	10.3397	1.67098	2.02e-16	1.37e-15	LINC01605	0.97882	0.39521	-1.30842	9.45e-19	8.08e-18
		TK1		KRT17P2	GS1-39E22.2		SERPINA7	2.66228	-4.23652	2.65242e-06	4.46373e-06							ORM2				IGKV1-17	TBC1D9									C6orf223	0.612267	3.61603	2.56217	1.1e-20	1.18e-19	TMEM9B-AS1	2.39313	0.972828	-1.29864	1.69e-23	2.48e-22
		SKA3		HTR3A	WI2-85898F10.1		DCAF8L1	2.46807	-4.28808	3.36994e-06	5.63e-06							HIST2H2AB				IGKV1OR2-3	FAM86B3P									IGKV1-17	39.7633	88.5812	1.15556	0.00110399	0.00177178	TBC1D9	100.149	9.62358	-3.37943	2.17e-50	7.12e-47
		NCAPG		IGLV3-25	CLPSL2		ALKAL1	2.36513	-3.05844	3.52731e-06	5.88588e-06							GABRA5				AC009229.2	AC073283.2									IGKV1OR2-3	0.235613	0.480584	1.02837	0.00123856	0.00197197	FAM86B3P	1.20971	0.598166	-1.01605	8.06e-12	3.34e-11
		CCNB2		RP5-897D18.1	MMP26		MTNR1B	2.34591	-3.43852	3.68645e-06	6.1424e-06							CDC20B				CSF2RB	IQCH									AC009229.2	0.165336	0.500366	1.59759	0.00180917	0.00281686	AC073283.2	0.663041	0.0916343	-2.85514	1.17e-07	3.05e-07
		GPRIN1		RP11-136K14.1	RP11-384P7.7		ESX1	2.72506	-3.32438	3.90341e-06	6.49078e-06							CCL7				KC877373.1	ANGPTL1									CSF2RB	3.00252	6.51568	1.11774	2.67e-06	5.96e-06	IQCH	0.639882	0.279238	-1.19631	9.67e-29	2.75e-27
		GTSE1		RP11-328C8.5	ZSCAN1		UGT2B10	2.23886	-2.17088	4.08871e-06	6.79208e-06							TNNI3				PAK3	ARFGEF3									KC877373.1	0.164249	0.405137	1.30253	1.04e-09	3.42e-09	ANGPTL1	1.09415	0.504283	-1.1175	7.24e-09	2.17e-08
		CDCA3		RP11-167H9.4	RN7SL709P		MAGEB1	2.47132	-2.12022	4.41431e-06	7.31822e-06							XKR7				ASNS	IGSF21									PAK3	0.21613	0.563086	1.38145	5.56e-11	2.11e-10	ARFGEF3	12.4931	5.23057	-1.25609	1.44e-25	2.71e-24
		RMI2		RP1-67A8.3	LINC01445		SPRR2D	3.53565	-0.476428	4.57009e-06	7.56598e-06							PPM1E				C8G	LINC02600									ASNS	6.88187	14.1365	1.03855	6.41e-25	1.1e-23	IGSF21	4.8407	1.2368	-1.9686	2.72e-11	1.07e-10
		SPAG5		LGSN	LINC01866		SLC6A5	2.28463	-4.03916	5.27858e-06	8.70731e-06							TRPM5				CSAG1	AC005288.1									C8G	0.514785	1.11292	1.11231	1.71e-11	6.85e-11	LINC02600	0.285781	0.0798083	-1.8403	1.63e-15	9.99e-15
		OIP5		Z83001.1	ST8SIA3		FABP1	2.49186	-1.76991	5.51518e-06	9.08356e-06							MAGEA1				CD207	NEK5									CSAG1	0.723069	4.29223	2.56952	5.46e-07	1.32e-06	AC005288.1	28.383	14.1702	-1.00216	6.36e-07	1.53e-06
		RPLP0P2		RP5-907D15.3	C9		PRSS48	2.09799	-3.11402	5.62549e-06	9.26189e-06							CCDC185				TFAP2E	ZNF423									CD207	1.89583	4.0284	1.08737	0.000160609	0.000288683	NEK5	1.1985	0.230862	-2.37612	1.92e-41	5.17e-39
		DEPDC1B		AACSP1	LINC01716		TBC1D21	2.62113	-3.89532	5.8234e-06	9.5799e-06							NEURL1				IL22RA2	PDZPH1P									TFAP2E	0.477461	1.1983	1.32753	1.84e-06	4.2e-06	ZNF423	1.35403	0.667644	-1.02011	1.99e-15	1.21e-14
		CDC20		FOXD1	SLC4A4		SLC17A4	2.23982	-3.81527	6.05342e-06	9.952e-06							NOTUM				ATG9B	C5orf49									IL22RA2	0.122495	1.54905	3.66058	1.38e-32	6.99e-31	PDZPH1P	0.31807	0.0142778	-4.4775	3.3e-22	4.13e-21
		RECQL4		CSAG1	FLT3		OTOP3	2.06232	-3.10277	6.88126e-06	1.126e-05							HS6ST3				CXCL11	REM2									ATG9B	0.440281	0.921919	1.06622	1.08e-10	3.96e-10	C5orf49	1.87563	0.423316	-2.14757	6.16e-31	2.34e-29
		BIRC5		SERPINB3	CNTNAP2		CGB5	2.34307	-4.04615	8.62146e-06	1.40065e-05							ASCL2				TRPV4	AC018529.1									CXCL11	6.23833	17.1896	1.4623	8.62e-10	2.87e-09	REM2	0.901776	0.429548	-1.06995	2.2e-12	9.62e-12
		C1QTNF6		SERPINB4	ARNT2		LIPF	2.1901	-1.69312	9.47173e-06	1.53426e-05							CARD17				DSC3	GRIK4									TRPV4	1.67768	3.71122	1.14543	7.94e-14	4.07e-13	AC018529.1	0.224138	0.106256	-1.07684	2.07e-07	5.26e-07
		MKI67		LVCAT1	PAH		SNTG1	2.03942	-2.77568	1.17633e-05	1.89413e-05							CACNA1H				IGHV3-20	AC004832.5									DSC3	2.44923	10.7948	2.13993	1.44e-12	6.43e-12	GRIK4	0.446177	0.110293	-2.01627	2.93e-22	3.7e-21
		SLC24A2		SSX5	RP11-247A12.1		HAND1	2.05504	-3.38459	1.21451e-05	1.95335e-05							GPR37L1				MYO10	GSC									IGHV3-20	2.72458	8.30936	1.6087	1.3e-06	3.01e-06	AC004832.5	1.43835	0.682776	-1.07493	8.13e-15	4.61e-14
		ESM1		PMPCAP1	C1orf189		FAM83C	2.32389	-1.46448	1.40571e-05	2.24891e-05							RUNDC3A				NPM2	CXCL14									MYO10	4.94809	11.598	1.22893	3.11e-22	3.9e-21	GSC	2.02551	0.779026	-1.37854	2.16e-11	8.57e-11
		CENPA		MAGEA10	RP11-483P21.2		NAA11	2.50649	-1.9139	1.46494e-05	2.33976e-05							LCN12				AL161431.1	SYT17									NPM2	0.275714	1.23927	2.16824	4.27e-33	2.31e-31	CXCL14	243.102	34.1835	-2.83019	5.35e-13	2.51e-12
		MTFR2		IGLV3-21	PSG11		OR8A1	2.20237	-4.13502	2.18824e-05	3.45516e-05							EDN3				HACD1	AL135786.1									AL161431.1	0.00993973	2.45547	7.94858	1.44e-19	1.35e-18	SYT17	3.96751	0.843992	-2.23293	4.51e-33	2.42e-31
		SHCBP1		DAZL	COMP		NTS	2.3996	4.81254	2.61851e-05	4.11915e-05							SYT1				NCMAP	ERBB2									HACD1	0.74277	2.70577	1.86505	1.99e-20	2.07e-19	AL135786.1	0.665862	0.254864	-1.3855	1.03e-13	5.23e-13
		CDC45		AMER2	SCGB1D4		TMIGD1	2.29634	-3.72529	2.76895e-05	4.34977e-05							FABP9				IGLV4-60	SFXN5									NCMAP	0.719684	4.27451	2.57032	2.38e-20	2.45e-19	ERBB2	117.306	24.9627	-2.23243	1.93e-24	3.14e-23
		RAD54L		ACADL	RNA5SP107		KRT33B	2.06286	-3.21201	2.78488e-05	4.37365e-05							MCIDAS				AC021087.3	DYNC2H1									IGLV4-60	7.91489	28.5689	1.8518	8.7e-05	0.000162279	SFXN5	3.3688	1.57909	-1.09314	1.81e-17	1.36e-16
		COMP		CTB-20D2.1	RP1-35C21.2		KRT77	2.1205	0.0542982	3.32177e-05	5.18857e-05							MYO3B				E2F3	CISH									AC021087.3	0.911183	5.24218	2.52436	0.0013874	0.00219316	DYNC2H1	1.89696	0.92584	-1.03486	3.5e-16	2.31e-15
		CIT		IGHV1-3	PEX5L-AS2		SEMG1	2.37547	-4.16881	3.81506e-05	5.93356e-05							IGFBPL1				ARHGEF4	CASC1									E2F3	5.29417	11.2249	1.08422	3.12e-31	1.25e-29	CISH	14.1703	5.59635	-1.34031	8.93e-28	2.26e-26
		POLQ		ITLN2	U91319.1		PASD1	2.33705	-3.83759	4.40103e-05	6.81398e-05							SPACA4				MESP2	AC109361.2									ARHGEF4	0.419734	1.50203	1.83937	2.39e-26	4.9e-25	CASC1	1.26481	0.303305	-2.06009	1.32e-34	9.01e-33
		RP11-417E7.2		PRSS41	PLIN1		MT1B	2.30606	-3.9831	4.45466e-05	6.89467e-05							DISP3				FAM78B	IFT140									MESP2	1.18124	2.71007	1.19802	0.000813916	0.00133022	AC109361.2	0.73194	0.135509	-2.43334	3.58e-27	8.25e-26
		RP11-863P13.3		CTD-2532K18.2	LINC01264		GJD2	2.52776	-3.72367	4.80118e-05	7.40761e-05							HIST1H4B				AL390729.1	NSG2									FAM78B	0.476646	1.14075	1.25899	1.34e-07	3.49e-07	IFT140	7.67574	3.40159	-1.1741	3.95e-30	1.35e-28
		MYBL2		AC008060.7	SLC8A2		OTOP1	2.03777	-4.2268	4.85221e-05	7.48254e-05							HMGA2				AC009041.2	SLC44A4									AL390729.1	0.168007	0.665388	1.98567	7.65e-16	4.86e-15	NSG2	1.32363	0.0335093	-5.3038	3.23e-21	3.64e-20
		IBSP		ATP13A5	HOXB6		TRIM43	2.16168	-2.71058	5.73324e-05	8.79484e-05							GDPD2				MATN4	LINC02130									AC009041.2	0.555558	3.27268	2.55846	2e-20	2.08e-19	SLC44A4	48.4602	9.21091	-2.39539	1.37e-37	1.51e-35
		MMP13		FEZF1	RN7SL394P		F9	2.46205	-3.44244	6.69577e-05	0.000102127							PLA2G4D				SLC43A3	AC006042.1									MATN4	0.143367	1.55898	3.44281	1.48e-35	1.16e-33	LINC02130	0.417534	0.0187323	-4.47829	1.21e-37	1.37e-35
		CTXN1		IGHG1	RP11-274H24.1		SLCO1B3	2.27107	-3.17487	6.74468e-05	0.000102847							CCNO				STEAP1B	LETM2									SLC43A3	6.00317	22.0111	1.87443	2.21e-36	1.99e-34	AC006042.1	4.23953	1.74567	-1.28012	7.94e-23	1.07e-21
		CNIH2		OLIG1	ZNF804B		MMP26	2.08932	-3.99418	6.88753e-05	0.000104928							CHST1				IGKV6-21	AC093838.1									STEAP1B	0.129672	0.82027	2.66124	1.29e-21	1.51e-20	LETM2	0.976604	0.295701	-1.72363	7.81e-23	1.05e-21
		UNC5B		CEL	HSPA8P8		DCAF12L1	2.1847	-1.71948	7.8399e-05	0.000119018							TUBA3D				IFNG	STMN3									IGKV6-21	10.0569	21.172	1.07398	0.00357886	0.00533614	AC093838.1	2.17848	0.0506056	-5.42788	1.87e-35	1.43e-33
		KIF26B		MRPL15P1	KRT8P8		UGT1A6	2.33761	-1.02665	0.00010329	0.000155492							CCL20				AL117335.1	SLC14A2									IFNG	0.259795	0.791574	1.60735	8.92e-08	2.36e-07	STMN3	22.7307	11.0222	-1.04423	3.64e-11	1.41e-10
		TTK		PLD5	FGB		RPTN	2.03479	-3.25737	0.000136723	0.000204112							CDH12				CD79A	PBX1									AL117335.1	0.154121	0.594647	1.94797	1.58e-22	2.06e-21	SLC14A2	0.242806	0.0388426	-2.64409	2.61e-16	1.74e-15
		MAD2L1		SMPX	LINC02118		STATH	2.71479	-2.91545	0.000156952	0.000233391							C1orf189				AC145676.1	MCIDAS									CD79A	7.34302	21.9683	1.58098	1.82e-07	4.67e-07	PBX1	20.2732	8.70754	-1.21924	3.14e-26	6.36e-25
		TRIP13		RP13-143G15.4	RNU1-134P		CTAG2	2.45251	-0.883861	0.000372451	0.000539997							CCL24				KCNJ16	SAMD11									AC145676.1	0.25964	0.815477	1.65113	0.00750863	0.0107078	MCIDAS	1.18677	0.301766	-1.97554	3.13e-11	1.22e-10
		RP11-424C20.2		RP11-399H11.2	CACNA1S		ZNF679	2.00397	-4.14757	0.000461545	0.000664184							SYN1				SEMA5B	SEMA6D									KCNJ16	0.13458	0.936248	2.79843	0.015924	0.0215374	SAMD11	3.17033	1.06599	-1.57244	3.21e-11	1.25e-10
		CLEC5A		AC097374.2	AC131056.3		UGT1A10	2.10717	-3.30853	0.000693781	0.000985108							UNC5A				ITPRIPL1	AGAP1-IT1									SEMA5B	0.366179	0.851701	1.2178	1.45e-08	4.19e-08	SEMA6D	1.20295	0.516411	-1.21999	9.16e-11	3.39e-10
		LEF1-AS1		AWAT1	CEACAM16		LACRT	2.29227	3.81661	0.000797648	0.00112809							EFNA2				DYNC1I1	AC008537.3									ITPRIPL1	0.431785	0.884759	1.03497	1.31e-09	4.26e-09	AGAP1-IT1	1.09538	0.442258	-1.30847	3.54e-15	2.09e-14
		EME1		HAO1	TAAR6		XAGE5	2.08859	-2.97153	0.00115648	0.00161594							SRD5A2				METTL7B	2020-03-04									DYNC1I1	0.399763	1.17056	1.54998	2.12e-07	5.39e-07	AC008537.3	0.953025	0.443514	-1.10354	0.00021589	0.00038211
		FN1		ANGPTL7	TCL1B		SPRR2E	2.05438	-0.720913	0.00293198	0.00396529							PRLH				MIR155HG	SERPINA6									METTL7B	0.757471	1.71147	1.17597	1.21e-07	3.16e-07	2020-03-04	0.2782	0.0606541	-2.19745	0.00037128	0.00063641
		MCM10		RPL10L	INSM1													KCNJ16				TMPRSS5	AL928742.1									MIR155HG	0.742448	1.5645	1.07534	1.75e-12	7.74e-12	SERPINA6	31.101	0.145919	-7.73565	7.38e-16	4.7e-15
		ARHGAP11A		PRB4	LEFTY1													SERPINB7				AC007906.2	ESR1									TMPRSS5	0.196952	1.35936	2.78701	2.36e-15	1.42e-14	AL928742.1	1.10229	0.358169	-1.62179	0.000472497	0.000798564
		SALL4		AC068491.3	CSRP3													HIST1H2AB				LIPG	AC037198.2									AC007906.2	1.18989	4.61308	1.95491	5.31e-06	1.15e-05	ESR1	47.7072	1.20749	-5.30413	1.13e-49	2.77e-46
		TONSL		RP11-125O18.1	NDP-AS1													RNASE10				FSD1	TPSD1									LIPG	0.245793	1.7526	2.83398	1.18e-21	1.4e-20	AC037198.2	16.1593	0.979419	-4.04429	2.66e-37	2.86e-35
		TLCD1		MAJIN	LINC01336													LTB				OCA2	SPOPL									FSD1	0.150914	0.870523	2.52816	3.56e-16	2.35e-15	TPSD1	2.01642	0.768787	-1.39114	2.29e-09	7.25e-09
		STIL		VNN3	RN7SL197P													MSMB				LY6E	TMEM161BP1									OCA2	0.0826024	1.28503	3.95948	8.71e-29	2.49e-27	SPOPL	13.78	5.83882	-1.23883	1.65e-34	1.11e-32
		LAGE3		RP11-572N21.1	LINC01344													DNAJC12				PPIAP77	AC007919.1									LY6E	123.984	264.678	1.09408	2.36e-14	1.28e-13	TMEM161BP1	0.494732	0.00883103	-5.80792	3.02e-32	1.47e-30
		RNFT2		SPRR2D	RN7SL513P													PROZ				SLC2A6	BFSP2-AS1									PPIAP77	0.137689	0.537046	1.96363	2.29e-16	1.54e-15	AC007919.1	0.618941	0.25173	-1.29792	7.8e-05	0.000146399
		P4HA3		LYZL1	RP11-159D12.11													SMC1B				NFE2L3	ZNF486									SLC2A6	1.67697	4.04738	1.27113	1.31e-14	7.28e-14	BFSP2-AS1	0.348571	0.049023	-2.82992	6.01e-10	2.04e-09
		FBXO43		ALKAL2	EGR3													KCNH2				AC092969.1	C10orf82									NFE2L3	6.14961	15.527	1.33621	1.29e-27	3.19e-26	ZNF486	5.37309	2.51255	-1.0966	3.25e-12	1.4e-11
		CDCA2		ELOA2	RP11-304F15.4													ANKRD1				MYBL2	AC126177.7									AC092969.1	0.132383	0.602729	2.18679	5.03e-20	4.96e-19	C10orf82	3.00817	0.120461	-4.64225	3.41e-27	7.89e-26
		RAB26		LINC01602	TTR													ZPLD1				RASGEF1C	DNAI1									MYBL2	18.2139	47.4518	1.38142	3.68e-26	7.42e-25	AC126177.7	0.816554	0.399812	-1.03023	5.07e-11	1.93e-10
		SPATA20P1		FAM181A-AS1	RP11-483I13.2													KCNH6				CDC25B	PGGHG									RASGEF1C	0.0927666	1.07122	3.5295	4.89e-32	2.3e-30	DNAI1	0.711656	0.192256	-1.88815	2.29e-15	1.39e-14
		CCDC78		RPS15AP29	RP4-530I15.9													CD1A				RGN	GHRH									CDC25B	13.5837	28.0154	1.04434	5.3e-20	5.21e-19	PGGHG	17.5967	8.2456	-1.09361	0.000983842	0.00158932
		GRM8		PNLIPRP1	RN7SL664P													USP41				IGHV3-52	IVD									RGN	0.586752	1.28843	1.13479	2.2e-08	6.22e-08	GHRH	1.19104	0.0446155	-4.73853	4.81e-19	4.25e-18
		CST1		DLL3	CA2													ELFN2				LINC01554	ANKRD20A5P									IGHV3-52	0.493537	1.10778	1.16644	0.00108611	0.00174479	IVD	17.0157	8.43137	-1.01303	2.41e-31	9.97e-30
		SQLE		ERN2	AC142293.3													DOK7				SLCO4A1	LINC01977									LINC01554	0.202517	2.41667	3.57691	3.23e-24	5.14e-23	ANKRD20A5P	0.490845	0.114769	-2.09654	3.6e-19	3.22e-18
		AC015849.16		BECN2	RP11-93I21.3													SCRT1				REM1	KIAA0825									SLCO4A1	0.716306	1.63723	1.1926	6.99e-12	2.92e-11	LINC01977	2.37598	1.02906	-1.2072	5.46e-09	1.66e-08
		CCNE2		RP11-236B18.5	C19orf33													SHISA8				TGFA	DNAJC1									REM1	0.716768	2.35299	1.71492	5.92e-07	1.43e-06	KIAA0825	0.456158	0.216064	-1.07807	1.5e-27	3.69e-26
		HIST1H3H		ONECUT2	CTD-3116E22.8													IFNB1				LY75	ACSM5									TGFA	1.56919	5.12403	1.70726	4.42e-26	8.84e-25	DNAJC1	45.2487	21.9421	-1.04417	4.73e-15	2.75e-14
		MFAP2		GHRHR	ZNF350-AS1													CSAG3				CDKN2A	ABCG1									LY75	1.14473	2.30028	1.00681	1.61e-13	7.97e-13	ACSM5	0.484469	0.237147	-1.03062	2.52e-14	1.36e-13
		HIST1H2BD		PLCZ1	CRAT37													IFNL1				IGHV3-48	C14orf132									CDKN2A	2.85001	16.496	2.53308	1.3e-24	2.16e-23	ABCG1	10.4377	4.89874	-1.09131	2.67e-28	7.18e-27
		GRM4		IGKV2-29	RN7SL183P													GDF9				KLK10	CPHL1P									IGHV3-48	15.228	32.7067	1.10286	6.27e-05	0.000119138	C14orf132	3.93022	1.51462	-1.37565	3.18e-21	3.59e-20
		AIM1L		SCGB1B2P	RP13-392I16.1													TMPRSS6				TMPRSS13	SNORD116-4									KLK10	2.50952	16.2104	2.69144	3.33e-18	2.67e-17	CPHL1P	2.62909	0.905359	-1.538	1.99e-17	1.49e-16
		CDC6		RP11-84N19.1	LCE2B													DYDC2				SLC5A6	CHRD									TMPRSS13	4.13009	8.81661	1.09405	8.44e-23	1.13e-21	SNORD116-4	0.635392	0.31142	-1.02879	2.24e-06	5.06e-06
		PITX1		AKR1C2	MIR4477B													NBPF4				GPM6B	ZSCAN1									SLC5A6	18.4934	44.6224	1.27076	1.45e-24	2.4e-23	CHRD	5.05321	0.684285	-2.88453	1.34e-34	9.1e-33
		METTL11B		SLC2A14	CST11													KPNA7				CD8B	GAL3ST2									GPM6B	2.14594	6.72913	1.64881	1.03e-28	2.92e-27	ZSCAN1	0.693339	0.251832	-1.4611	1.06e-10	3.89e-10
		RTKN2		KRT14	RN7SL660P													MEIKIN				ELAVL2	CDHR4									CD8B	1.6102	3.25186	1.01402	1.38e-06	3.2e-06	GAL3ST2	0.940622	0.403237	-1.22198	0.00321449	0.00482799
		SCT		RP11-565A3.2	RHBG													NPTX2				TRAV2	DQX1									ELAVL2	0.540368	1.51107	1.48355	0.000129148	0.000235054	CDHR4	0.30224	0.0172944	-4.12732	1.05e-15	6.57e-15
		F12		RP11-391L3.3	RP11-356O9.2													AGR2				SULT4A1	AMFR									TRAV2	0.500851	1.03846	1.05198	8.05e-06	1.71e-05	DQX1	1.01036	0.335088	-1.59225	9.17e-08	2.43e-07
		E2F2		DPYD-AS1	RP4-654C18.1													HIST1H2BI				CDK2AP1	RERG									SULT4A1	0.436554	1.13877	1.38324	8.1e-10	2.71e-09	AMFR	37.6802	18.8293	-1.00083	2.69e-24	4.32e-23
		RP4-616B8.5		IGHD3-3	TENM2													HSPB3				BBOX1	GALNT6									CDK2AP1	26.8291	65.3758	1.28496	1.16e-34	7.97e-33	RERG	21.561	5.9671	-1.85332	8.87e-30	2.88e-28
		MMP1		ACTA1	MYOCD													SCG2				E2F2	TMEM144									BBOX1	1.64007	8.19677	2.3213	2.32e-19	2.13e-18	GALNT6	37.6057	9.66466	-1.96016	4.62e-32	2.19e-30
		HIST1H2AM		AC024592.9	RP11-510N19.5													TMEM171				IGHV3-7	ITGBL1									E2F2	1.69253	4.53235	1.42108	1.06e-23	1.59e-22	TMEM144	3.69026	1.33046	-1.47179	5.06e-36	4.24e-34
		RP11-542B15.1		SLC1A6	OR4B1													NKX2-2				CTLA4	TAF1A-AS1									IGHV3-7	3.90565	9.51157	1.28412	0.00831359	0.011772	ITGBL1	4.90643	2.2863	-1.10166	4.71e-15	2.75e-14
		FAM72A		DPP10	RP11-210M15.1													C6orf222				LINC00707	AC139769.1									CTLA4	1.00494	2.257	1.1673	1.07e-12	4.83e-12	TAF1A-AS1	1.82494	0.905944	-1.01036	2.53e-22	3.22e-21
		TDO2		RN7SL751P	RP11-454P7.3													VIL1				ICAM1	PCDH19									LINC00707	0.128567	3.55539	4.78941	1.26e-24	2.09e-23	AC139769.1	2.76996	1.18589	-1.22389	3.78e-15	2.23e-14
		KREMEN2		TRIM43	SCGB2A2													SERPINC1				PRTFDC1	CTTNBP2									ICAM1	11.1186	24.1499	1.11904	4.82e-13	2.27e-12	PCDH19	1.41944	0.19046	-2.89777	1.37e-22	1.8e-21
		TYMS		HSD52	RP11-143E21.1													KRT75				TNNI2	KLHDC1									PRTFDC1	2.21154	7.68887	1.79772	4.27e-20	4.25e-19	CTTNBP2	0.918597	0.249499	-1.8804	1.67e-20	1.75e-19
		SDS		SAA2-SAA4	RPL29P7													NBPF6				AC083809.1	PDK4									TNNI2	1.2107	4.35816	1.84787	1.7e-16	1.16e-15	KLHDC1	1.24275	0.544212	-1.1913	3.19e-26	6.46e-25
		WBSCR28		RNU1-88P	GSG1L													F2				MIR4539	CT62									AC083809.1	0.147043	0.530007	1.84977	2.66e-09	8.36e-09	PDK4	12.6575	5.89168	-1.10324	1.77e-07	4.53e-07
		BLM		RP11-135A1.3	SNAP25													IL12B				MAP2	CYP2B7P									MIR4539	0.452537	1.7408	1.94364	1.36e-07	3.52e-07	CT62	2.86445	0.163837	-4.12792	6.69e-48	9.4e-45
		ATAD2		RP11-66H6.3	TRAV18													OTOR				CXCL5	AL132657.1									MAP2	0.964021	4.08568	2.08344	5.91e-19	5.18e-18	CYP2B7P	47.0055	3.19849	-3.87737	9.06e-36	7.33e-34
		CHRNA6		GLYATL2	NBPF22P													C1orf105				CA13	N4BP3									CXCL5	0.224524	2.26218	3.33277	3.02e-28	8.07e-27	AL132657.1	0.698253	0.341514	-1.03181	2.66e-19	2.41e-18
		ORC1		ACE2	RP11-713M6.2													SSTR2				CDCA5	LINC01237									CA13	0.926555	2.22812	1.26588	9.36e-19	8e-18	N4BP3	7.48787	3.69876	-1.01751	1.63e-20	1.72e-19
		TUBB3		RP11-556I13.2	FOXN4													PRSS2				VXN	RGS7									CDCA5	6.83527	13.7952	1.0131	2.9e-22	3.66e-21	LINC01237	0.997322	0.390787	-1.35168	2.22e-16	1.49e-15
		SAPCD2		ORM1	ALOXE3													C4orf50				STAC	NPY1R									VXN	0.328735	3.54178	3.42948	1.73e-09	5.54e-09	RGS7	0.246384	0.0524089	-2.23302	1.24e-06	2.88e-06
		C9orf172		ALPPL2	RP11-452H21.1													GNG4				CCDC9B	LINC01836									STAC	0.338108	2.66946	2.98099	5.25e-34	3.34e-32	NPY1R	75.4857	12.3258	-2.61452	8.73e-06	1.84e-05
		BRIP1		RPL37P18	GLYATL3													SEZ6L				SMC1B	SMCR2									CCDC9B	2.06918	4.31625	1.06072	6.4e-15	3.67e-14	LINC01836	1.04684	0.507069	-1.04579	2.65e-06	5.92e-06
		IGSF9		CIB4	DCAF12L1													TNIP3				LCN2	AC004066.2									SMC1B	0.363778	1.45938	2.00422	9.78e-25	1.65e-23	SMCR2	0.435986	0.117766	-1.88836	1.74e-19	1.62e-18
		HIST1H2AI		SP8	APOH													KIAA0319				TREX2	PTPRN2									LCN2	8.31664	65.8695	2.98554	6.77e-20	6.59e-19	AC004066.2	0.386035	0.151357	-1.35078	1.78e-14	9.78e-14
		ARTN		SLC9A3P2	TMIGD1													STMND1				LINC00857	AC127526.2									TREX2	0.226957	0.657854	1.53535	1.16e-21	1.37e-20	PTPRN2	6.02377	0.803329	-2.9066	1.36e-19	1.28e-18
		HIST1H2BO		LL22NC03-63E9.3	ZG16													SPANXB1				CXCL1	WFS1									LINC00857	0.266622	1.02001	1.93571	5.91e-15	3.41e-14	AC127526.2	0.326315	0.0662764	-2.2997	2.34e-31	9.7e-30
		IL21R		RP11-317N12.1	AC005008.3													POU3F2				MIR3682	RF00569									CXCL1	1.1088	4.15828	1.90699	2.26e-23	3.26e-22	WFS1	25.5258	9.63037	-1.40629	2.09e-42	6.96e-40
		RP1-63M2.7		IGHV7-40	RP11-377D9.1													HIST2H3D				AC004069.1	CAPN13									MIR3682	3.34106	6.80239	1.02574	3.53e-10	1.23e-09	RF00569	2.57153	1.2708	-1.01689	2.02e-14	1.1e-13
		GSG2		CHRND	RP11-607P23.1													TUBA3E				AC006357.1	AC062028.1									AC004069.1	0.317528	0.785793	1.30727	6.13e-24	9.4e-23	CAPN13	9.08562	2.84112	-1.67712	3.57e-30	1.24e-28
		CST2		CAPZA3	KRT18P1													MAGEA12				B4GALNT1	RNF225									AC006357.1	0.185153	0.396685	1.09928	8.49e-18	6.58e-17	AC062028.1	1.41112	0.081467	-4.11448	4.22e-08	1.16e-07
		HNRNPA1P21		ISL2	AC010970.2													A2ML1				MAP3K21	SPATA46									B4GALNT1	0.631747	1.2932	1.03352	4.06e-07	1e-06	RNF225	0.251851	0.117435	-1.10071	2.27e-05	4.55e-05
		LINC00337		ASNSP1	RP11-506E9.3													AC020636.2				AC023983.2	CAVIN2									MAP3K21	0.865584	3.09008	1.8359	1.52e-32	7.71e-31	SPATA46	0.462171	0.143255	-1.68984	9.1e-12	3.75e-11
		TIGD3		RP11-180C1.1	AC092569.2													ZDHHC22				CRYAB	RAD17P1									AC023983.2	0.247453	0.773418	1.6441	9.82e-18	7.56e-17	CAVIN2	3.47946	1.73111	-1.00716	5.18e-07	1.26e-06
		PRR11		AC006372.6	HP													PGA5				AC144652.1	PLPPR3									CRYAB	12.5953	97.2928	2.94945	1.93e-26	3.99e-25	RAD17P1	0.59206	0.0230926	-4.68024	1.84e-44	1.01e-41
		HIST1H2BK		RP11-286B14.1	SNORA79													PYY				CD247	FRY									AC144652.1	0.975182	2.01774	1.049	2.95e-17	2.17e-16	PLPPR3	3.88763	0.990353	-1.97288	1.67e-21	1.94e-20
		BCAS4		XAGE2	RP11-202G11.2													MSLN				POPDC3	DNMBP-AS1									CD247	1.36244	2.74577	1.01102	2.36e-08	6.64e-08	FRY	2.45973	1.00399	-1.29276	1.82e-27	4.41e-26
		KIFC2		LINC01287	GSTM5													LGALS9C				RIOK1	AC009962.1									POPDC3	0.257257	0.629195	1.2903	6.68e-11	2.52e-10	DNMBP-AS1	0.3716	0.172262	-1.10914	2.65e-11	1.04e-10
		MISP		HOXD12	RP11-379K22.3													NUPR2				ABTB2	ENO4									RIOK1	7.56298	15.1342	1.00079	2.88e-27	6.75e-26	AC009962.1	0.308734	0.0988917	-1.64244	8.99e-06	1.9e-05
		LGALS8-AS1		C12orf56	AC079613.1													CACNA1B				TNF	AC073573.1									ABTB2	1.87666	4.65091	1.30935	1.17e-27	2.9e-26	ENO4	0.293434	0.125444	-1.22599	8.02e-24	1.22e-22
		HTR1D		IGHV2-26	LINC01441													GATA4				SLC26A9	SPEF2									TNF	1.16448	3.57964	1.62013	9.06e-13	4.14e-12	AC073573.1	0.25121	0.051352	-2.2904	2.97e-17	2.17e-16
		HIST1H4I		CTAG2	MAB21L2													DLL3				AC005005.3	TRH									SLC26A9	0.118514	0.970334	3.03343	1.25e-33	7.28e-32	SPEF2	1.19368	0.403851	-1.56352	1.31e-34	8.98e-33
		RP11-122M14.1		RP11-97N19.3	RP11-95G17.2													WDR38				LTB	RGS11									AC005005.3	0.399436	1.28852	1.68968	5.39e-16	3.49e-15	TRH	12.9449	0.0585165	-7.78932	6.97e-25	1.2e-23
		C3orf67		RP5-1121A15.3	DMP1													KRT1				TYMS	KRT41P									LTB	5.7382	16.7923	1.54913	4.31e-09	1.33e-08	RGS11	2.61473	0.587586	-2.15379	2.89e-28	7.74e-27
		RP11-480I12.5		LINC01179	CLRN1-AS1													ERVV-2				CECR7	CCDC24									TYMS	9.67767	21.3479	1.14136	4.56e-16	2.97e-15	KRT41P	0.874617	0.0962586	-3.18366	0.00056688	0.000947176
		GPRC5A		RP11-268P4.5	LINC01788													SBK2				LINC01508	DNAJC12									CECR7	0.884497	2.60597	1.55889	1.18e-22	1.56e-21	CCDC24	6.07031	3.01097	-1.01155	3.28e-22	4.11e-21
		HIST1H3D		RPTN	MTCO1P29													HIST1H4A				AP001574.1	RGL3									LINC01508	0.191672	0.724521	1.91839	7.68e-13	3.54e-12	DNAJC12	25.9007	1.96017	-3.72394	7.45e-43	2.99e-40
		COX6C		ERVV-2	PRODH													SALL3				PPP1R14C	LINC02593									AP001574.1	0.270406	1.13254	2.06636	5.39e-22	6.59e-21	RGL3	3.3865	1.33578	-1.34211	1.57e-17	1.19e-16
		TESMIN		OTOS	RP4-725G10.4													MGAT5B				GATA6	RAMP3									PPP1R14C	2.11596	19.1409	3.17727	4.48e-42	1.4e-39	LINC02593	1.61528	0.550827	-1.55211	1.65e-07	4.25e-07
		GNG13		LINC00645	CMA1													S100A8				RPL39P3	C1orf226									GATA6	1.53078	3.70669	1.27586	1.25e-10	4.56e-10	RAMP3	21.2927	9.8752	-1.10848	0.000196162	0.00034873
		SYNDIG1		CDX2	RP11-433M22.2													CNGA2				GPR55	TMEM150C									RPL39P3	17.644	35.7693	1.01954	9.8e-07	2.31e-06	C1orf226	9.51061	4.44514	-1.09731	9.08e-14	4.63e-13
		PIF1		LINC01793	RPL5P13													TUBA4B				PAPSS1	DBNDD2									GPR55	0.142903	0.74664	2.38537	9.41e-13	4.29e-12	TMEM150C	28.3255	4.4207	-2.67975	1.67e-11	6.68e-11
		S100P		PRB1	RP11-100L22.1													HIST1H2BB				HMGB1P1	PRLH									PAPSS1	27.2221	63.0577	1.21189	1.57e-25	2.92e-24	DBNDD2	2.24923	1.02901	-1.12818	2.35e-15	1.42e-14
		RP11-480I12.9		TBC1D3P1	IGLV3-15													HORMAD1				AP005233.2	LINC01214									HMGB1P1	0.359443	1.33444	1.8924	1.54e-24	2.55e-23	PRLH	0.320689	0.0372366	-3.10638	1.38e-27	3.4e-26
		CST4		KRT38	CHST1													SLC8A2				AC107294.2	RAB19									AP005233.2	0.517746	2.27513	2.13564	0.00460452	0.00675483	LINC01214	0.251437	0.0489238	-2.36159	1.37e-14	7.62e-14
		FOXD3-AS1		LVCAT5	SNTG1													SERPINA9				VAX2	LRRC4C									AC107294.2	0.950102	3.20184	1.75275	3.66e-08	1.01e-07	RAB19	1.68826	0.632589	-1.4162	1.83e-24	2.99e-23
		CAMK2N2		PNMA5	MYOZ2													GPR26				ANKS6	BAK1P2									VAX2	1.78731	4.22985	1.24282	2.47e-13	1.2e-12	LRRC4C	1.29935	0.479055	-1.43953	4.76e-14	2.5e-13
		AP000251.3		COX7B2	RP11-1112C15.2													LRG1				IL12RB2	U91319.1									ANKS6	0.936458	2.83598	1.59856	1.69e-28	4.7e-27	BAK1P2	0.253201	0.011245	-4.49293	7.58e-30	2.49e-28
		EPN3		KRT74	FAM9C													LGALS9B				AL353764.1	SYNPO2L									IL12RB2	0.323107	2.56389	2.98825	8.41e-33	4.39e-31	U91319.1	0.401306	0.198509	-1.0155	1.53e-08	4.41e-08
		TNFRSF9		RP11-336N8.4	KCND3-AS1													DRC7				BX470102.1	AL671883.1									AL353764.1	0.216524	0.605398	1.48336	2.85e-21	3.23e-20	SYNPO2L	1.82992	0.171725	-3.41361	2.11e-06	4.79e-06
		MAPK8IP2		COL18A1-AS1	PLAC1													DUSP13				ZC3H12C	RUNDC3A-AS1									BX470102.1	0.325778	1.48615	2.18962	3.66e-16	2.41e-15	AL671883.1	0.750256	0.242235	-1.63098	5.17e-14	2.71e-13
		CYSRT1		RSU1P3	RP11-611O2.2													GPR158				PKP4-AS1	PGAP3									ZC3H12C	0.618068	1.32359	1.09862	6.2e-17	4.4e-16	RUNDC3A-AS1	0.298415	0.114798	-1.37822	8.62e-08	2.29e-07
		ATP2A1-AS1		KRT78	LOR													GAL				TMEM40	AZGP1P2									PKP4-AS1	0.195681	0.499436	1.3518	5.31e-12	2.25e-11	PGAP3	32.9053	9.20647	-1.8376	2.17e-25	3.94e-24
		CTD-2510F5.4		RP11-380J14.1	CYP1A1													FAM83A				IL34	AC136475.3									TMEM40	0.848744	2.30001	1.43824	2.65e-13	1.29e-12	AZGP1P2	0.561881	0.0355068	-3.9841	7.32e-28	1.87e-26
		ILDR2		SLURP1	CELF3													LHX1				RPL10P13	ABCC8									IL34	2.74876	12.2982	2.16159	1.93e-28	5.28e-27	AC136475.3	7.58277	2.42462	-1.64497	0.0140506	0.0191644
		MIR4653		RP5-1011O1.3	SNORA2C													CDH7				IGHG3	OR7E47P									RPL10P13	0.159875	0.56879	1.83095	1.64e-12	7.31e-12	ABCC8	2.16465	0.197465	-3.45447	6.13e-39	8.86e-37
		TICRR		DPP10-AS1	KNDC1													PAX1				SLAIN1	GP2									IGHG3	100.668	216.344	1.10373	2.21e-08	6.25e-08	OR7E47P	0.374933	0.165204	-1.18238	1.1e-11	4.48e-11
		HAPLN1		C11orf86	SSTR2													SBSN				PIK3CD-AS2	SYP									SLAIN1	0.743469	2.1595	1.53835	9.18e-13	4.2e-12	GP2	14.7446	0.929912	-3.98695	1.92e-34	1.29e-32
		RP11-127I20.5		SBSN	FOXJ1													NEU4				AC012074.1	NEURL1									PIK3CD-AS2	0.945512	2.07824	1.1362	8.57e-11	3.18e-10	SYP	1.51807	0.365238	-2.05533	5.33e-12	2.25e-11
		COL1A1		AP000221.1	HS3ST5													AARD				IGKV3OR2-268	SNORA63C									AC012074.1	0.253554	0.678321	1.41968	1.48e-19	1.38e-18	NEURL1	3.53861	1.07821	-1.71454	1.86e-17	1.39e-16
		HSH2D		LINC01854	UNC13C													POTEC				UNC13D	AL136164.4									IGKV3OR2-268	0.956765	2.32809	1.28291	0.000254714	0.000446646	SNORA63C	1.73478	0.128902	-3.7504	0.00150035	0.00236088
		METRN		FABP6	IGHE													SLC1A1				SPOCK2	LINC00589									UNC13D	2.84293	7.40176	1.38049	4.63e-22	5.72e-21	AL136164.4	3.27113	1.55081	-1.07677	7.56e-09	2.26e-08
		LEF1		AC007099.1	APOB													GCNT3				SPHK1	HOXB5									SPOCK2	4.37794	10.0355	1.19679	3.88e-13	1.85e-12	LINC00589	0.349735	0.083207	-2.07149	1.11e-08	3.25e-08
		CELSR3		MAGEA3	RP4-753D4.2													ALG1L				SKP2	TPSB2									SPHK1	5.64021	13.5694	1.26654	3.74e-14	1.98e-13	HOXB5	3.35375	1.22367	-1.45456	5.76e-12	2.43e-11
		RP11-426C22.4		AC011298.2	RP11-44F14.10													ZP4				ORC6	TCEAL3									SKP2	4.75505	11.2704	1.24501	4.26e-25	7.51e-24	TPSB2	13.6156	3.79044	-1.84482	1.19e-18	1.01e-17
		PTK6		RP3-407E4.4	VMO1													HMX2				BCL11B	PIH1D2									ORC6	1.58829	3.69931	1.21978	3.89e-27	8.91e-26	TCEAL3	26.4491	8.48653	-1.63997	1.45e-35	1.15e-33
		RP11-399C16.3		MOG	RP11-301G7.1													MUC5B				AL390066.1	RPL7AP26									BCL11B	0.780899	1.71673	1.13646	4.62e-14	2.43e-13	PIH1D2	1.07096	0.502294	-1.0923	9.94e-21	1.07e-19
		2019-03-04		CR2	TNFRSF18													TMEM82				FRMD3	AC015921.1									AL390066.1	0.196553	0.5291	1.42863	4.38e-18	3.48e-17	RPL7AP26	0.241481	0.0665389	-1.85964	3.38e-08	9.4e-08
		S100A14		PIWIL3	TMEM190													FEZF2				EMILIN3	CILP									FRMD3	0.950483	3.22077	1.76067	2.11e-15	1.28e-14	AC015921.1	0.253993	0.118385	-1.10131	2.92e-20	2.97e-19
		POSTN		SCb-64M4.1	CRISP1													HIST1H2AH				MIR222HG	GUCY1A2									EMILIN3	0.228979	2.01967	3.14083	3.14e-13	1.51e-12	CILP	34.018	12.3721	-1.4592	1.28e-13	6.44e-13
		CTD-2529O21.1		MYT1L	AC011513.4													RXFP3				AC010980.2	OR4K12P									MIR222HG	0.346185	0.778002	1.16823	7.17e-09	2.15e-08	GUCY1A2	1.17429	0.458935	-1.35543	9.67e-15	5.45e-14
		SMIM22		RP11-874J12.4	RNU1-28P													INA				FABP7	HSPA8P15									AC010980.2	0.225128	0.590509	1.39121	1.47e-14	8.14e-14	OR4K12P	0.868343	0.0122063	-6.15257	2.36e-23	3.4e-22
		SYNGR4		IGKV2D-40	RP11-379K17.9													VMO1				UCHL1	INSM1									FABP7	5.39701	98.5984	4.19133	2.74e-34	1.82e-32	HSPA8P15	0.59021	0.218417	-1.43414	1.28e-15	7.99e-15
		SRMS		KIF25-AS1	CACNG7													ASCL1				TMEM171	AC110619.1									UCHL1	4.26153	22.8676	2.42386	1.92e-13	9.43e-13	INSM1	2.79271	0.306189	-3.18917	0.000880888	0.00143277
		HIST3H2BB		ZIC5	RP11-234K19.1													NPHS1				MYEOV	AC097478.1									TMEM171	0.21381	1.07621	2.33156	1.91e-22	2.45e-21	AC110619.1	3.24772	0.320717	-3.34006	3.02e-33	1.68e-31
		CLPSL2		CT45A1	NHLH2													TLX2				ATL2	2020-03-11									MYEOV	1.27581	6.10644	2.25892	0.00109331	0.00175563	AC097478.1	0.255464	0.0640295	-1.99631	3.96e-17	2.86e-16
		RP11-429J17.5		RP11-145G20.1	SLC14A2-AS1													MT1H				PIF1	NRIP1									ATL2	11.4571	26.312	1.19948	2.6e-30	9.14e-29	2020-03-11	0.323658	0.0671099	-2.26987	0.00111753	0.00179277
		IFI6		RP11-386B13.4	GHSR													KRT2				TTYH1	AC007405.3									PIF1	0.549256	1.75359	1.67476	1.17e-27	2.9e-26	NRIP1	18.4571	7.18255	-1.36161	2.07e-25	3.78e-24
		NKAIN1		AMD1P4	CD36													PGLYRP4				QRICH2	AC026801.2									TTYH1	0.657382	9.77831	3.89478	1.82e-26	3.77e-25	AC007405.3	2.78695	1.36763	-1.02701	6.34e-15	3.64e-14
		CCNE1		RP11-382F24.1	RP11-96C23.14													GABRA3				AL136126.1	TNXA									QRICH2	0.85298	2.24848	1.39836	5.11e-08	1.39e-07	AC026801.2	2.28665	1.00595	-1.18468	4.69e-27	1.06e-25
		GINS4		RP4-564F22.6	RNA5SP160													IL17C				PERP	NKAIN1									AL136126.1	0.357658	0.715683	1.00074	8.26e-06	1.75e-05	TNXA	0.636875	0.168208	-1.92076	2.9e-21	3.29e-20
		RP11-567M16.2		RP11-10O22.1	RN7SL217P													ACOD1				IGLV4-3	FAM198B-AS1									PERP	59.506	119.357	1.00417	2.7e-22	3.43e-21	NKAIN1	18.8684	2.42313	-2.96102	2.77e-24	4.44e-23
		RP11-14D22.1		RP11-553K8.5	SP5													CDK5R2				SGPP2	MYL7									IGLV4-3	0.550772	1.72699	1.64873	0.000992749	0.00160239	FAM198B-AS1	2.70136	0.453702	-2.57387	6.13e-40	1.11e-37
		ANKRD22		NAA11	RN7SL255P													PCSK1N				KLRG2	REEP6									SGPP2	2.11234	4.62465	1.1305	7.46e-11	2.79e-10	MYL7	0.531619	0.161888	-1.7154	0.000508041	0.000854598
		STARD10		CTC-518B2.8	KRT8P42													FCRL4				NIPAL4	AL121829.2									KLRG2	2.77657	6.99961	1.33397	1.06e-13	5.35e-13	REEP6	34.2047	15.8171	-1.11271	1.75e-24	2.86e-23
		CNTD2		LINC01446	TUBA3C													FAM71F1				RN7SL417P	SLC4A7									NIPAL4	0.181051	0.80995	2.16144	1.59e-19	1.49e-18	AL121829.2	0.364788	0.13801	-1.40229	3.43e-14	1.82e-13
		FBN2		MIR4296	RP11-19P22.5													BFSP2				MAML2	NBPF6									RN7SL417P	0.165582	0.402017	1.27971	0.000277393	0.000483826	SLC4A7	7.75917	3.5663	-1.12147	2e-13	9.82e-13
		SLC7A5		MIR604	RTBDN													CLEC6A				TPX2	AC013652.1									MAML2	2.90969	7.92978	1.44642	5.64e-29	1.64e-27	NBPF6	0.596192	0.104388	-2.51382	8.94e-10	2.97e-09
		HIST1H2BC		FOXA2	CKM													TFF3				MPP6	FAAH									TPX2	19.5534	45.8171	1.22847	4.28e-24	6.7e-23	AC013652.1	0.502874	0.102679	-2.29206	6.63e-25	1.14e-23
		RTBDN		LINC01036	OPCML-IT1													NKAIN4				HAAO	IGFBP5									MPP6	0.589451	1.78439	1.59798	5.22e-39	7.72e-37	FAAH	14.8448	6.88028	-1.10942	3.58e-27	8.25e-26
		HIST2H2BE		FEZF2	GOLGA6L11P													HIST2H2AA3				IL32	AKAP5									HAAO	1.82259	5.78899	1.66732	8.33e-10	2.78e-09	IGFBP5	314.41	72.7736	-2.11116	3.24e-12	1.4e-11
		GRIN2D		AC114803.3	LRRTM3													MUC19				IGKC	AC006970.2									IL32	10.9111	30.1775	1.46767	3.11e-17	2.27e-16	AKAP5	1.78579	0.642692	-1.47436	6.48e-15	3.72e-14
		LINC01429		GABRA3	RP11-480C22.1													PEX5L				IGLV1-44	GALNT7									IGKC	554.307	1706.36	1.62217	3.62e-08	1e-07	AC006970.2	0.964392	0.419148	-1.20216	1.82e-08	5.21e-08
		RP11-428L9.2		RP11-15G16.1	RP11-3M1.1													KCNF1				SLC12A1	ZCCHC24									IGLV1-44	65.7325	143.112	1.12247	3.79e-07	9.36e-07	GALNT7	20.9317	7.58283	-1.46488	6e-30	2e-28
		ZMYND10		PDCL2	RP11-68I3.7													DYDC1				NXPH4	PRSS30P									SLC12A1	0.159046	0.441709	1.47365	4.6e-07	1.12e-06	ZCCHC24	8.95759	4.40619	-1.02358	8.57e-21	9.25e-20
		LRRC37A9P		ANKRD20A10P	RARRES2P10													EIF4E1B				TIGIT	AL021395.1									NXPH4	2.83893	7.50702	1.40289	1.07e-13	5.43e-13	PRSS30P	0.367479	0.163654	-1.16701	7.2e-10	2.42e-09
		KLK4		TCHHL1	LRRC74B													LIN28A				FMNL2	AC055854.1									TIGIT	1.10322	2.33571	1.08214	1.52e-10	5.51e-10	AL021395.1	1.3658	0.114707	-3.57372	8.5e-20	8.18e-19
		LINC00511		MAGEA6	RN7SL483P													KRT3				ZNF454	C2orf27A									FMNL2	4.39934	10.0638	1.19382	2.79e-29	8.45e-28	AC055854.1	3.51769	0.19805	-4.1507	1.43e-40	3.03e-38
		ERMN		LINC01950	C14orf180													NIPAL4				AUNIP	ATP7B									ZNF454	0.29646	0.83687	1.49717	4.14e-20	4.13e-19	C2orf27A	3.45497	1.22099	-1.50063	8.17e-27	1.77e-25
		RP11-1399P15.1		RP11-263K4.4	MTCO1P46													ZBBX				KLHL2P1	PRKAR2A-AS1									AUNIP	1.56816	3.67594	1.22904	2.07e-24	3.37e-23	ATP7B	4.97354	1.08941	-2.19072	7.04e-38	8.35e-36
		TRPA1		HTN1	C19orf81													ZAN				CHI3L2	TMEM26									KLHL2P1	0.270023	0.676265	1.32451	7.85e-17	5.52e-16	PRKAR2A-AS1	0.736509	0.365335	-1.01148	1.34e-23	1.99e-22
		RP4-533D7.5		RP11-637N19.1	LY6G6C													TEX14				AC245041.1	MYMX									CHI3L2	6.15201	49.401	3.00541	3.07e-29	9.23e-28	TMEM26	2.86758	0.399227	-2.84455	6.5e-26	1.27e-24
		APOBEC3B		IGHD3-22	RP11-407P15.2													TMPRSS4				AC008592.5	HTR7P1									AC245041.1	0.124455	0.864923	2.79694	2.51e-06	5.64e-06	MYMX	0.533878	0.255212	-1.06482	3.23e-10	1.13e-09
		LINC02086		LINC01896	RN7SL177P													ZIC2				FAM81A	CFAP70									AC008592.5	0.160009	1.14725	2.84196	2.15e-19	1.98e-18	HTR7P1	3.14813	0.847635	-1.89298	3.31e-23	4.7e-22
		RP4-694A7.2		ISX	ADAMTS19-AS1													HPDL				LY6D	SLC4A10									FAM81A	0.463874	1.0479	1.1757	4.37e-05	8.47e-05	CFAP70	0.842143	0.311723	-1.4338	1.96e-23	2.84e-22
		FDPSP8		LINC01518	HOXB-AS3													ROBO2				RN7SL192P	AKR7A3									LY6D	4.40154	21.4199	2.28287	7.38e-25	1.26e-23	SLC4A10	0.370973	0.0260595	-3.83143	0.000180583	0.00032258
		KLKP1		RP11-962G15.1	FAM92A1P2													PAX2				CPA4	AC015802.1									RN7SL192P	0.308106	0.753947	1.29104	4.24e-13	2.01e-12	AKR7A3	17.9071	2.13823	-3.06604	1.09e-33	6.48e-32
		RP13-463N16.6		LINC00488	RP11-749H17.1													CLEC3A				SLC7A5	VWA2									CPA4	0.929667	5.23907	2.49453	1.51e-26	3.16e-25	AC015802.1	0.276597	0.116076	-1.25272	4.9e-15	2.85e-14
		IGFL3		REG1A	LINC00261													SNTN				S100A3	KCND2									SLC7A5	21.932	64.6346	1.55927	2.93e-31	1.19e-29	VWA2	6.51074	1.99783	-1.70439	3.81e-19	3.4e-18
		CIB3		RPS16P9	CTD-2383I20.1													LRRIQ4				HSD17B2	AC131392.1									S100A3	0.715766	1.97466	1.46404	9.14e-15	5.15e-14	KCND2	1.38793	0.526494	-1.39845	1.27e-13	6.39e-13
		RP11-624L4.1		RP11-1070N10.5	APCS													TUBA3C				ULBP3	BCL2									HSD17B2	0.312853	0.890231	1.50869	2.57e-17	1.89e-16	AC131392.1	0.599235	0.163169	-1.87676	3.99e-19	3.56e-18
		ACAN		AC006262.10	SHISA2													GABBR2				TRBJ2-2	FSTL4									ULBP3	0.387732	1.56362	2.01176	1.66e-27	4.04e-26	BCL2	14.6673	3.8196	-1.94111	3.73e-30	1.28e-28
		SMCR2		RN7SL398P	OR4D10													NAT16				MELTF	KCNJ3									TRBJ2-2	0.431025	0.92752	1.10561	0.000132306	0.000240446	FSTL4	0.817608	0.303099	-1.43162	5.15e-23	7.09e-22
		ACTL8		SPRR4	CTB-49A3.2													OTOG				AC009303.4	KRT18									MELTF	2.30582	14.9853	2.70019	6.09e-28	1.57e-26	KCNJ3	13.9486	0.0760318	-7.5193	6.3e-33	3.33e-31
		ULBP1		RP11-391L3.4	VCX3B													PGK2				NOTCH1	AC010487.1									AC009303.4	0.43692	0.909355	1.05748	1.93e-25	3.53e-24	KRT18	312.443	121.963	-1.35715	5.51e-31	2.14e-29
		RIIAD1		RP11-1070N10.7	RP11-281P11.1													ROS1				AC022509.1	PNMT									NOTCH1	5.47367	11.0647	1.01538	9.45e-22	1.13e-20	AC010487.1	2.57324	1.17129	-1.13549	3.54e-23	5e-22
		CFB		VCX2	CELA2A													C16orf92				AC100812.1	AC020663.2									AC022509.1	0.107614	0.88367	3.03765	3.56e-15	2.1e-14	PNMT	12.9337	1.95995	-2.72225	6.98e-08	1.87e-07
		CNTNAP2		RP11-1103G16.1	RP1-32B1.4													PAGE2				NFIB	LINC01341									AC100812.1	0.208095	0.753426	1.85622	4.12e-35	3.01e-33	AC020663.2	1.01054	0.439266	-1.20196	9.83e-19	8.39e-18
		RP11-865I6.2		RP11-43D4.3	DNAI2													TCL1B				PTGFR	SLC22A5									NFIB	8.82227	24.555	1.4768	7.13e-26	1.39e-24	LINC01341	0.485983	0.196659	-1.30521	6.04e-16	3.89e-15
		OR2W6P		LINC01475	TM4SF5													SIX3				LINC00337	SERPINI1									PTGFR	0.440524	1.43193	1.70067	1.32e-08	3.84e-08	SLC22A5	3.30571	1.24997	-1.40307	2.43e-38	3.12e-36
		CSMD2		RP11-308B16.2	AC017060.1													UTS2				GAPDHP35	FAM25A									LINC00337	0.217186	0.483241	1.15381	6.95e-15	3.97e-14	SERPINI1	10.8373	2.6949	-2.0077	3.25e-18	2.61e-17
		FAM72C		HTR2C	MAST4-IT1													PPBP				ARHGEF9	GSTM3									GAPDHP35	1.41319	2.95722	1.06528	2.6e-07	6.56e-07	FAM25A	1.58401	0.222791	-2.82982	2.78e-07	6.98e-07
		RP11-806H10.4		RP11-1029M24.4	CFAP221													AGR3				CCNA2	PPP1R3C									ARHGEF9	3.64257	7.35392	1.01356	7.98e-13	3.67e-12	GSTM3	36.1004	5.71985	-2.65797	5.99e-31	2.29e-29
		RP3-323A16.1		RP11-17E4.1	RN7SL827P													CYP2A7				ADGRG2	LURAP1L									CCNA2	8.1249	17.4175	1.10012	6.85e-23	9.29e-22	PPP1R3C	11.8072	2.3451	-2.33194	5.97e-29	1.72e-27
		HIST2H2BF		MAGEA12	STK19B													H3.Y				SLC35F3	C1QTNF7									ADGRG2	0.185687	1.14796	2.62813	3.76e-06	8.29e-06	LURAP1L	25.2066	9.46681	-1.41285	8.07e-19	6.95e-18
		MROH6		RTL1	RP11-98O2.1													DPYSL5				CSN3	TTC8									SLC35F3	0.677421	2.41406	1.83334	1.18e-08	3.46e-08	C1QTNF7	0.515565	0.118925	-2.1161	9.54e-24	1.44e-22
		HIST1H4E		CFHR4	SLC35D3													ASIC5				SULT1B1	AL049869.3									CSN3	11.543	208.035	4.17174	1.33e-12	5.98e-12	TTC8	5.47753	2.43787	-1.1679	1.75e-40	3.67e-38
		LRTM2		BACH1-IT3	AC073551.1													NETO1				GHRL	CNTN3									SULT1B1	0.0750467	0.984799	3.71397	0.0171108	0.0230428	AL049869.3	0.609501	0.300262	-1.02141	2.3e-13	1.13e-12
		SPEF1		NKX2-3	DNAH9													CREB3L3				ANKLE1	AL023881.1									GHRL	0.361676	0.981357	1.44008	7.87e-07	1.87e-06	CNTN3	0.709086	0.344519	-1.04138	1.49e-09	4.82e-09
		RP11-320N21.1		DSCR4	RNU1-67P													TMEM132E				AC024940.1	MSMB									ANKLE1	0.193346	0.790503	2.03159	2.3e-25	4.16e-24	AL023881.1	0.386445	0.152373	-1.34265	1.22e-15	7.6e-15
		RP1-86C11.7		UGT1A6	RP11-60A24.3													CRP				IGHV3-73	TMEM63C									AC024940.1	0.38604	3.29383	3.09294	4.06e-15	2.38e-14	MSMB	35.4991	5.60958	-2.66182	1.33e-08	3.86e-08
		RP11-465L10.10		RP11-169F17.1	RP5-1185K9.1													SHISA9				KIF2C	AL132708.1									IGHV3-73	14.7385	249.771	4.08295	0.000419043	0.000713062	TMEM63C	5.8029	2.24387	-1.37078	2.68e-27	6.31e-26
		CXCL9		RP11-182I10.1	LINC00930													APOA2				IFFO2	RTN1									KIF2C	6.4733	16.4277	1.34355	1.22e-28	3.42e-27	AL132708.1	0.470155	0.0248777	-4.24021	6.07e-25	1.05e-23
		LINC01605		CASC9	RN7SL449P													STXBP5L				AL391069.3	ZNRF2P2									IFFO2	3.9199	8.72327	1.15405	1.5e-21	1.76e-20	RTN1	3.64873	1.22358	-1.57629	4.79e-09	1.47e-08
		DEGS2		DPPA2	PHF21B													PSORS1C2				LINC02515	AC080112.3									AL391069.3	0.623542	1.48637	1.25324	1.68e-19	1.57e-18	ZNRF2P2	0.4906	0.221333	-1.14833	8.47e-13	3.89e-12
		ATP1A3		LINC01511	PLG													CSTL1				CWH43	CDC20B									LINC02515	0.331134	2.58425	2.96426	1.83e-08	5.21e-08	AC080112.3	0.679694	0.151218	-2.16826	1.15e-37	1.32e-35
		CPNE7		LINC01913	PTENP1-AS													S100A9				OR7E39P	PLAT									CWH43	0.34064	1.11646	1.71261	1.94e-09	6.19e-09	CDC20B	1.92033	0.0508771	-5.2382	1.47e-18	1.23e-17
		TGFBR3L		CTD-2147F2.1	GSTA3													MS4A8				CHRNA5	AC093903.1									OR7E39P	0.146954	0.550356	1.905	5.73e-17	4.08e-16	PLAT	29.5869	8.54771	-1.79135	1.16e-18	9.82e-18
		IL9R		C8orf22	KPNA2P2													COL9A3				TMEM132E	AL157895.1									CHRNA5	0.476607	1.39163	1.5459	4.81e-24	7.5e-23	AC093903.1	0.284822	0.0264789	-3.42714	2.41e-14	1.3e-13
		HIST2H2AC		SPRR1B	SNORA38													SLC5A5				PTX3	GAMT									TMEM132E	0.249189	1.06992	2.10219	0.00151865	0.00238833	AL157895.1	0.275078	0.0519041	-2.40592	2.17e-30	7.68e-29
		UNC13A		LINC01194	FMO9P													GNGT1				CLEC7A	CMA1									PTX3	0.984602	10.6099	3.42972	6.86e-22	8.31e-21	GAMT	21.5309	6.99201	-1.62263	4.35e-30	1.47e-28
		DMBX1		LINC02167	CLUHP4													SEZ6				CLEC4E	HOXB-AS2									CLEC7A	2.72977	6.44484	1.23936	1.62e-15	9.96e-15	CMA1	0.828054	0.370806	-1.15906	3.38e-08	9.39e-08
		HOXC-AS3		SLCO1B7	UBBP2													IGF2BP3				CCL19	ATP5PBP5									CLEC4E	0.69774	1.57433	1.17397	1.24e-12	5.61e-12	HOXB-AS2	1.1068	0.273075	-2.01902	1.08e-14	6.06e-14
		HIST1H1C		RN7SKP227	RP11-506O24.2													MMP12				NOTUM	EDARADD									CCL19	23.6729	48.7704	1.04277	0.00816209	0.0115725	ATP5PBP5	1.00581	0.453388	-1.14954	2.03e-12	8.93e-12
		CTD-2116N20.1		SPRR2A	RPS20P15													VTN				SAA2-SAA4	AL357093.2									NOTUM	0.245711	1.21785	2.3093	0.000182887	0.000326555	EDARADD	4.4829	1.1927	-1.9102	2.35e-17	1.74e-16
		LINC01522			RP11-313L6.2													AMER3				C6orf15	LINC01342									SAA2-SAA4	1.75274	4.54547	1.37482	5.96e-09	1.8e-08	AL357093.2	0.299778	0.0927516	-1.69245	0.00204284	0.00316067
		CTD-3001H11.2			CIDEC													CSAG2				ADM	RHBDL1									C6orf15	0.397165	7.52855	4.24456	2.93e-19	2.65e-18	LINC01342	0.248443	0.0611011	-2.02364	2.35e-19	2.15e-18
		TMEM249			BRINP2													MALRD1				IGHV3-49	KCTD6									ADM	3.85959	8.03414	1.0577	2.04e-13	1e-12	RHBDL1	2.79983	1.06041	-1.40071	2.77e-16	1.84e-15
		WT1-AS			MIR4300HG													GATA5				ITPRID1	FAM184B									IGHV3-49	26.2007	71.572	1.44979	0.000271888	0.000474856	KCTD6	7.95224	2.32873	-1.77182	8.34e-36	6.81e-34
		PPP2R2C			SCARNA21													ASCL4				IGHV3-30	DENND1B									ITPRID1	0.122958	0.657827	2.41954	4.73e-18	3.75e-17	FAM184B	0.502922	0.106604	-2.23807	5.01e-20	4.94e-19
		RP11-485G7.6			TACR3													MKRN3				LCK	EMX1									IGHV3-30	49.9156	103.767	1.05579	7.07e-06	1.51e-05	DENND1B	5.66025	2.5118	-1.17215	4.18e-08	1.15e-07
		HPN			RP11-141M1.1													FAM25A				FOXP4-AS1	GRM4									LCK	2.80285	5.79944	1.04902	2.33e-10	8.25e-10	EMX1	0.602765	0.062431	-3.27126	6.76e-25	1.16e-23
		HIST1H4J			RNU6-1209P													SHH				MRAP2	AC138356.2									FOXP4-AS1	0.734373	2.72715	1.89281	4.03e-21	4.49e-20	GRM4	0.587658	0.107406	-2.4519	2.16e-18	1.76e-17
		MEX3A			RP11-297L17.2													CPLX2				MAGEA10	C16orf74									MRAP2	0.730009	1.81832	1.31662	2.24e-11	8.88e-11	AC138356.2	1.6472	0.640798	-1.36208	8.28e-12	3.43e-11
		OTX1			PGAM4P2													LHX9				IGKV2D-40	TCEAL4									MAGEA10	0.0860923	1.10141	3.67732	1.85e-13	9.09e-13	C16orf74	3.80798	1.77154	-1.10402	8e-20	7.73e-19
		CTC-276P9.4			LINC02112													SLC1A6				MBNL1-AS1	CIRBP									IGKV2D-40	7.04824	17.313	1.29652	0.00466216	0.00683226	TCEAL4	80.4723	33.9713	-1.24417	5.03e-25	8.77e-24
		PRR15			RP11-110L15.2													PRB3				TGM1	FYB2									MBNL1-AS1	0.415379	0.97119	1.22533	7.48e-10	2.51e-09	CIRBP	49.5227	24.5803	-1.01059	1.08e-30	3.95e-29
		COL22A1			RP11-328J6.1													TGM4				AC016027.1	AP001528.3									TGM1	0.37455	1.20073	1.68068	7.86e-23	1.06e-21	FYB2	1.05999	0.150187	-2.81922	5.09e-25	8.86e-24
		WT1			LCE1D													TGM3				AL033384.1	PTGER4P2									AC016027.1	0.255575	0.523824	1.03534	1.26e-24	2.1e-23	AP001528.3	0.851814	0.394749	-1.1096	4.75e-17	3.4e-16
		LGALS17A			RP11-226M10.3													SOX2				TUBB4A	C20orf204									AL033384.1	0.158072	0.934931	2.56428	1.69e-20	1.78e-19	PTGER4P2	0.803172	0.263442	-1.60822	1.51e-06	3.49e-06
		RN7SL3			METTL11B													COL6A5				MOGAT2	AC107884.2									TUBB4A	0.312943	1.72609	2.46353	8.35e-14	4.28e-13	C20orf204	0.521151	0.242724	-1.10239	2.45e-10	8.65e-10
		RP11-909N17.2			RP13-870H17.3													CPB1				TMEM200C	GPER1									MOGAT2	1.12034	2.93081	1.38736	7.21e-05	0.000135838	AC107884.2	0.539305	0.178442	-1.59564	7.03e-20	6.82e-19
		TEX19			RP11-301N24.3													FOXG1				FAM72D	AC104825.1									TMEM200C	0.249072	0.659735	1.40532	9.28e-09	2.74e-08	GPER1	2.86335	0.918602	-1.64019	5.77e-09	1.75e-08
		RP11-616M22.11			PCSK2													TCF24				ZNF883	TNNT1									FAM72D	0.244938	0.59261	1.27467	1.18e-09	3.87e-09	AC104825.1	5.02225	2.30376	-1.12434	2.58e-21	2.95e-20
		KCNG3			COL4A6													SLCO1B7				RAB6B	MALRD1									ZNF883	1.24768	3.74841	1.58703	1.91e-18	1.57e-17	TNNT1	17.4524	6.50855	-1.42302	2.33e-09	7.36e-09
		RP11-74M13.4			LHCGR													GABRA1				SUV39H2	RIMS1									RAB6B	1.30601	2.99858	1.19912	5.19e-21	5.71e-20	MALRD1	1.0608	0.0324392	-5.03127	1.42e-21	1.66e-20
		HIST1H2BL			SNORA46													NTNG1				HTR3A	RAMP1									SUV39H2	3.21133	7.33519	1.19167	2.71e-31	1.1e-29	RIMS1	0.403723	0.0876257	-2.20394	2.4e-08	6.75e-08
		ARNT2			RP11-1134I14.4													SPTSSB				AC009275.1	NRK									HTR3A	0.0677095	1.45926	4.42974	2.27e-11	8.98e-11	RAMP1	18.9242	5.73113	-1.72334	1.33e-15	8.27e-15
		PP14571			RP11-14O19.2													MAGEC2				LINC01139	CST9L									AC009275.1	0.221017	0.448195	1.01997	9.47e-07	2.23e-06	NRK	0.898277	0.429069	-1.06595	1.31e-18	1.1e-17
		PARD6B			RN7SL126P													SERPINA12				MAMLD1	SCIN									LINC01139	1.33552	3.45074	1.3695	0.000587784	0.000980188	CST9L	0.527606	0.00131677	-8.64631	5.1e-24	7.92e-23
		RNF224			LCN10													MT3				AC245884.12	AC104667.2									MAMLD1	0.897087	2.86481	1.67512	8.16e-23	1.09e-21	SCIN	1.91576	0.449843	-2.09042	2.75e-06	6.13e-06
		SPP1			SLC3A1													FMR1NB				HIST1H2BJ	C16orf45									AC245884.12	0.247095	0.742455	1.58724	8.45e-13	3.88e-12	AC104667.2	1.79513	0.788584	-1.18676	8.73e-24	1.32e-22
		HOXC10			RP11-515O17.3													SPIB				AP000344.1	AQP11									HIST1H2BJ	3.36323	7.27509	1.11312	1.37e-08	3.97e-08	C16orf45	9.95593	2.49068	-1.99902	3.8e-32	1.82e-30
		RAMP1			CCL14													BPIFA2				AC092164.1	DCAF10									AP000344.1	0.487542	1.2157	1.31819	9.04e-12	3.73e-11	AQP11	1.61395	0.751693	-1.10238	1e-13	5.1e-13
		EDN2			LRG1													AKAP14				FAM83B	ZMAT4									AC092164.1	0.4409	0.885939	1.00676	3.69e-11	1.43e-10	DCAF10	16.3203	7.66274	-1.09074	3.54e-18	2.84e-17
		MIR3153			GPR26													NELL1				LINC01235	NR4A2									FAM83B	1.83776	3.81988	1.05558	1.22e-11	4.98e-11	ZMAT4	0.806346	0.108552	-2.89301	3.07e-09	9.58e-09
		KCNK15			RN7SL555P													C20orf85				SYCE1L	AC139769.3									LINC01235	1.26396	6.84944	2.43803	6.17e-17	4.38e-16	NR4A2	7.41911	3.54627	-1.06494	1.8e-11	7.21e-11
		CTA-126B4.7			CD177P1													SMIM32				ACSM3	FAM131B									SYCE1L	0.764506	1.88993	1.30573	5.93e-16	3.82e-15	AC139769.3	0.990635	0.468767	-1.07948	4.46e-12	1.9e-11
		RUNDC3A-AS1			RP3-388N13.3													R3HDML				UPK3BL1	PKIB									ACSM3	0.453126	1.28804	1.50719	3.15e-12	1.36e-11	FAM131B	0.726151	0.241942	-1.58561	1.22e-13	6.13e-13
[truncated: 1,226 more rows]
